# Supplementary material for: Synthesis and structure–activity relationship (SAR) studies of 1,2,3-triazole, amide, and ester-based benzothiazole derivatives as potential molecular probes for tau protein
Source: Royal Society of Chemistry journal article supplement (doi:10.1039/d2md00358a), 2023-01-01
Supplement: d2md00358a1.pdf [file d2md00358a1.pdf]

## Supporting Information

# Synthesis and Structure–Activity Relationship (SAR) Studies of 1,2,3-Triazole, Amide, and Ester-Based Benzothiazole Derivatives as Potential Molecular Probes for Tau Protein

Hendris Wongso,<sup>a,b,c</sup> Maiko Ono,<sup>d</sup> Tomoteru Yamasaki,<sup>e</sup> Katsushi Kumata,<sup>e</sup> Makoto Higuchi,<sup>d</sup>  
Ming-Rong Zhang,<sup>e</sup> Michael J. Fulham,<sup>f</sup> Andrew Katsifis,<sup>\*f</sup> Paul A. Keller<sup>\*a</sup>

<sup>a</sup>School of Chemistry and Molecular Bioscience, Molecular Horizons, University of Wollongong, Wollongong, NSW 2522, Australia

<sup>b</sup>Research Center for Radioisotope, Radiopharmaceutical, and Biodosimetry Technology, National Research and Innovation Agency, Puspiptek, Banten 15314, Indonesia.

<sup>c</sup>Research Collaboration Center for Theranostic Radiopharmaceuticals, National Research and Innovation Agency, Sumedang 45363, Indonesia

<sup>d</sup>Department of Functional Brain Imaging, National Institutes for Quantum Science and Technology, Chiba 263-8555, Japan.

<sup>e</sup>Department of Advanced Nuclear Medicine Sciences, National Institutes for Quantum Science and Technology, Chiba 263-8555, Japan.

<sup>f</sup>Department of PET and Nuclear Medicine, Royal Prince Alfred Hospital, Camperdown, NSW 2050, Australia

## Table of Contents

|                                                                          |           |
|--------------------------------------------------------------------------|-----------|
| 1. General experimental information                                      | S3        |
| 2. Synthesis of 1,2,3-triazole, amide, and ester derivatives             | S4        |
| General procedure A                                                      | S4        |
| General procedure B                                                      | S4        |
| General procedure C                                                      | S5        |
| General procedure D                                                      | S5        |
| Compounds <b>35-39</b>                                                   | S5-S7     |
| Compounds <b>41-43</b>                                                   | S7-S8     |
| Compounds <b>54-63</b>                                                   | S9-S11    |
| Compounds <b>64-78</b>                                                   | S11-S17   |
| Compounds <b>84-88</b>                                                   | S18-S19   |
| Compounds <b>89-93</b>                                                   | S19-S21   |
| Compounds <b>109-121</b>                                                 | S21-S27   |
| Compound <b>122</b>                                                      | S27       |
| Compounds <b>127-130</b>                                                 | S27-S29   |
| 3. $^1\text{H}$ NMR and $^{13}\text{C}$ NMR spectra of final compounds   | S30-S69   |
| 4. $^1\text{H}$ NMR and $^{13}\text{C}$ NMR spectra of key intermediates | S70-S89   |
| 5. HRMS spectra of final compounds                                       | S90-S125  |
| 6. Physicochemical properties of several ligand candidates               | S126-S128 |
| 7. References                                                            | S129      |

## 1. General Experimental Information

Unless stated otherwise, all chemicals were laboratory or reagent grade and were purchased from Merck (Australia) or AK Scientific, Inc (USA). All chemicals were used as received. All solvents were reagent grade and, when necessary, were purified and dried by standard methods. Water was purified via Millipore filtration prior to use. HOBT was purchased with added stabilizer (10% w/w H<sub>2</sub>O), and therefore, the quantity required for reactions was adjusted accordingly and is reflected in the reagent mass reported in the experimental. All reactions requiring anhydrous conditions were conducted under a positive atmosphere of nitrogen in oven-dried glassware. Cold reaction temperatures were obtained by an ice bath (0 °C). Heating of reaction was performed with a paraffin oil bath. Standard syringe and autopipette techniques were used for the anhydrous addition of liquids. Reactions were routinely monitored by TLC analysis performed on aluminium-backed SiO<sub>2</sub> gel plates (F254 grade – 0.20 mm thickness) or by low resolution mass spectrometry (LRMS) on Shimadzu LC-2010 mass spectrometer. Visualization on TLC plates was achieved with UV light ( $\lambda = 254, 365$  nm), ninhydrin stain, or cerium ammonium molybdate stain. All filtrations were conducted as a gravity filtration through a filter paper Whatman Grade 4 (20 – 25  $\mu$ m) or as a vacuum filtration through a sintered glass funnel (medium porosity). Vacuum filtration was achieved with the aid of vacuum pump. Organic solutions were dried over anhydrous Na<sub>2</sub>SO<sub>4</sub>. Solvent removal via concentration was performed on a rotary evaporator under reduced pressure. All solvent mixtures are expressed in terms of volume ratio (i.e. v/v). Normal phase flash column chromatography was performed on SiO<sub>2</sub> gel 60 with a positive air pressure. Preparative TLC was run using PLC silica gel 60 F<sub>254</sub> 1 mm plates (20 x 20 cm<sup>2</sup>). All synthesized compounds were dried under high vacuum (< 1 mbar) before determination of chemical yields and spectroscopic characterization. All synthesized compounds were subjected to full spectroscopic characterization and assignment. Melting points were determined on a Gallenkamp melting point apparatus in open capillary tubes and were uncorrected. <sup>1</sup>H and <sup>13</sup>C NMR spectra were recorded on a Bruker Avance 400 (400 MHz) or Varian Inova 500 (500 MHz) NMR spectrometer. Chemical shifts ( $\delta$ ) were reported in parts per million (ppm) relative to the internal standard. Samples were dissolved in CDCl<sub>3</sub> (with TMS as the internal standard – 0.00 ppm), CD<sub>3</sub>OD (solvent resonance as internal standard – 3.31 ppm) or DMSO-*d*<sub>6</sub> (solvent resonance as internal standard – 2.50 ppm). <sup>13</sup>C NMR signal assignments were confirmed by analysis of NMR experiments: APT, gCOSY, gHSQC, gHMBC, zTOCSY, NOESY and/or gHSQC-TOCSY. Low resolution mass spectrometry (LRMS) spectra were recorded on a

Shimadzu LC-2010 mass spectrometer in electrospray positive and negative ionization modes (ESI-MS). High resolution mass spectrometry (HRMS) spectra were recorded on a Waters Quadrupole-Time of Flight (QTOF) Xevo spectrometer in electrospray positive and negative ionization modes (ESI-MS). All mass spectrometry samples were dissolved in HPLC grade MeOH. Solid-state infrared spectroscopy was performed on a Bruker Vertex 70 FTIR spectrometer in combination with a MIRacle 10 Single Reflection Attenuated Total Reflectance accessory outfitted with a 1.5 mm round diamond crystal. IR peaks are reported as the wavenumber ( $\nu_{\max}$  in  $\text{cm}^{-1}$ ) of the maximum absorption. Analytical HPLC was performed on a Shimadzu LC-2030C 3D UV/vis detector ( $\lambda = 254 \text{ nm}$ ) using a C-18 column ( $5 \mu\text{m}$ ,  $4.9 \times 150 \text{ mm}$ ) at  $25 \text{ }^\circ\text{C}$  using mobile phases A (water and 0.1% trifluoroacetic acid (TFA)) and B (MeCN and 0.1% TFA) at a flow rate of  $1 \text{ mL}\cdot\text{min}^{-1}$ . The following gradient was applied: gradient elution for 35 min at 0 – 100% of solvent B, linear increase from 0 – 100% of solvent B over 25 min, hold at 100% of solvent B for 10 min (tau ligands). The purity of all final compounds was found to be higher than 95%.

## 2. Synthesis of 1,2,3-Triazole, Amide, and Ester Derivatives

### General Procedure A: Synthesis of 1,2,3-triazole product (CuAAC reaction)

**General Procedure A<sub>1</sub>:** To a stirred solution of alkyne (1.0 eq) in *t*-BuOH/H<sub>2</sub>O (1:1, 20 mL/mmol alkyne) was added CuSO<sub>4</sub>·5H<sub>2</sub>O (0.1 eq), sodium ascorbate (0.2 eq), and the appropriate azide (2.0 eq). Stirring was prolonged at rt for 24 h under N<sub>2</sub> atmosphere, and the resulting reaction mixture was poured into H<sub>2</sub>O (25 mL), and extracted with EtOAc (3 x 25 mL). The organic solution was separated, washed with H<sub>2</sub>O (2 x 25 mL), brine (2 x 25 mL), dried (Na<sub>2</sub>SO<sub>4</sub>), filtered, and concentrated. The residue was purified by preparative TLC plate chromatography to afford the 1,4-disubstituted-1,2,3-triazole product.

**General Procedure A<sub>2</sub>:** To a stirred solution of alkyne (1.0 eq) in *t*-BuOH/H<sub>2</sub>O (1:1, 20 mL/mmol alkyne) was added CuSO<sub>4</sub>·5H<sub>2</sub>O (0.1 eq), sodium ascorbate (0.2 eq), and the appropriate azide (2.0 eq). Stirring was prolonged at rt for 24 h under N<sub>2</sub> atmosphere, and the resulting precipitate was filtered. The residue was triturated with sequential addition of CH<sub>2</sub>Cl<sub>2</sub>, MeCN, and hot MeOH to afford the 1,4-disubstituted-1,2,3-triazole product.

### General Procedure B: Azidation of alkyl bromide

The appropriate alkyl bromide or benzyl bromide or phenylethyl bromide (1.0 eq) and NaN<sub>3</sub> (1.5 eq) were combined in anhydrous DMF (20 mL), and stirred at  $55 \text{ }^\circ\text{C}$  for 24 h. The resulting

reaction mixture was poured into H<sub>2</sub>O (25 mL) and extracted with CH<sub>2</sub>Cl<sub>2</sub> (3 x 25 mL). The organic layer was washed with H<sub>2</sub>O (2 x 25 mL), brine (2 x 25 mL), dried (Na<sub>2</sub>SO<sub>4</sub>), filtered, and concentrated. The azide product was used for the next reaction without further purification (alkyl azide) or purified by flash chromatography (benzyl azide and phenylethyl azide) over SiO<sub>2</sub> gel (CH<sub>2</sub>Cl<sub>2</sub>/MeOH).

### **General Procedure C: Amide Coupling**

The acid (1.0 eq), the appropriate aromatic amine (1.0 eq), HOBT (1.0 eq), EDCI (1.3 eq), and DIPEA (4.0 eq) were combined in anhydrous DMF (10 mL/mmol), and stirred at rt for 24 h under N<sub>2</sub> atmosphere. The resulting reaction mixture was poured into H<sub>2</sub>O (50 mL), and extracted with EtOAc (3 x 50 mL). The organic layer was washed with H<sub>2</sub>O (2 x 50 mL), brine (2 x 50 mL), dried (Na<sub>2</sub>SO<sub>4</sub>), filtered, and concentrated. The residue was purified by preparative TLC plate chromatography to afford the desired amide product.

### **General Procedure D: Ester Formation**

The benzothiazole salt (1.0 eq) and the appropriate alkyl bromide (1.0 eq) were combined in anhydrous DMF (10 mL/mmol), and stirred at rt for 24 h under N<sub>2</sub> atmosphere. The resulting reaction mixture was poured into H<sub>2</sub>O (50 mL), and extracted with EtOAc (3 x 50 mL). The organic layer was washed with H<sub>2</sub>O (2 x 50 mL), brine (2 x 50 mL), dried (Na<sub>2</sub>SO<sub>4</sub>), filtered, and concentrated. The residue was purified by preparative TLC plate chromatography to afford the desired ester product.

**2-aminobenzo[*d*]thiazol-6-ol 35.**<sup>1</sup> To a stirred solution of thiourea **34** (7.60 g, 0.10 mol) in EtOH (200 mL) and concentrated HCl (9.0 mL) was added a hot solution of 1,4-benzoquinone **33** (21.60 g, 0.20 mol) in EtOH (400 mL). The mixture was stirred at rt for 48 h. The solvent was evaporated, and the residue triturated with hot MeCN (100 mL). This process was repeated until TLC analysis of the solid showed only one component. The solid was collected and washed with cold EtOH (10 mL) to afford the product as the hydrochloride salt. The free base was obtained by dissolving the salt in a minimal volume of H<sub>2</sub>O, followed by neutralisation using NaOAc. The resulting precipitated was collected by filtration, yielding the hydroxy benzothiazole **35** (12.05 g, 72%) as a dark grey solid. The spectroscopic data was in agreement with that previously reported. TLC (CH<sub>2</sub>Cl<sub>2</sub>/MeOH – 90:10): R<sub>f</sub> = 0.41. <sup>1</sup>H NMR (400 MHz, CD<sub>3</sub>OD) δ 7.20 (d, *J* = 8.8 Hz, 1H), 7.01 (d, *J* = 2.4 Hz, 1H), 6.73 (dd, *J* = 8.8, 2.4 Hz, 1H).

$^{13}\text{C}$  NMR (400 MHz,  $\text{CD}_3\text{OD}$ )  $\delta$  164.4, 152.6, 146.1, 132.3, 118.6, 114.0, 107.4. MS (ESI +ve)  $m/z$  167 ( $[\text{M} + \text{H}]^+$ , 100%).

**6-((*tert*-butyldimethylsilyloxy)benzo[*d*]thiazol-2-amine 36.** To a stirred solution of hydroxy benzothiazole **35** (5.00 g, 30.1 mmol) in anhydrous DMF was added TBDMS-Cl (5.40 g, 36.1 mmol) and imidazole (2.46 g, 36.1 mmol). The reaction was stirred at rt for 24 h, and partitioned between  $\text{H}_2\text{O}$  (150 mL) and EtOAc (150 mL). The aqueous phase was extracted with EtOAc (2 x 100 mL), and the combined organic layers dried ( $\text{Na}_2\text{SO}_4$ ), filtered, and concentrated. The residue was subjected to flash chromatography over  $\text{SiO}_2$  gel (EtOAc/hexanes – 30:70) to afford the protected phenol **36** (0.35 g, 41%) as a reddish oil. The spectroscopic data was in agreement with that previously reported. TLC (EtOAc/hexanes – 30:70):  $R_f$  = 0.57.  $^1\text{H}$  NMR (400 MHz,  $\text{CDCl}_3$ )  $\delta$  7.35 (d,  $J$  = 8.4 Hz, 1H), 7.05 (d,  $J$  = 2.4 Hz, 1H), 6.80 (dd,  $J$  = 8.4, 2.4 Hz, 1H), 5.85 (br s, 2H), 0.98 (s, 9H), 0.19 (s, 6H).  $^{13}\text{C}$  NMR (400 MHz,  $\text{CDCl}_3$ )  $\delta$  165.2, 151.2, 146.5, 132.2, 119.2, 118.9, 112.0, 25.8, 18.3, -4.67. MS (ESI +ve)  $m/z$  281 ( $[\text{M} + \text{H}]^+$ , 100%). HRMS (ESI +ve TOF) calcd for  $\text{C}_{13}\text{H}_{21}\text{N}_2\text{OSSi}^+$  281.1138, found 281.1138 ( $[\text{M} + \text{H}]^+$ ).

**6-((*tert*-butyldimethylsilyloxy)-2-iodobenzo[*d*]thiazole 37.** To a solution of protected phenol **36** (0.52 g, 1.86 mmol) and *p*-toluenesulfonic acid monohydrate (1.12 mg, 6.51 mmol) in MeCN (55 mL) was added a solution of  $\text{NaNO}_2$  (0.26 g, 3.72 mmol) and KI (0.80 g, 4.83 mmol) in  $\text{H}_2\text{O}$  (2.0 mL) at 0 °C. The reaction was allowed to reach rt, and was stirred for 18 h. The reaction mixture was quenched with  $\text{H}_2\text{O}$  (100 mL) and basified with 2 M  $\text{NaHCO}_3$  to pH 8-9, followed by addition of  $\text{Na}_2\text{S}_2\text{O}_3$  (10 mL), yielding a brown precipitate. The precipitate was collected by filtration, washed with  $\text{H}_2\text{O}$  (20 mL), and dried *in vacuo*. The residue was subjected to flash chromatography over  $\text{SiO}_2$  gel (EtOAc/hexanes – 30:70) to afford the iodobenzothiazole **37** (0.46 g, 63%) as a grey solid. TLC (EtOAc/hexanes – 30:70):  $R_f$  = 0.69. Mp 68 °C.  $^1\text{H}$  NMR (400 MHz,  $\text{CDCl}_3$ )  $\delta$  7.86 (d,  $J$  = 8.4 Hz, 1H), 7.26 (d,  $J$  = 2.4 Hz, 1H), 6.94 (dd,  $J$  = 8.4, 2.4 Hz, 1H), 1.00 (s, 9H), 0.22 (s, 6H).  $^{13}\text{C}$  NMR (400 MHz,  $\text{CDCl}_3$ )  $\delta$  154.3, 149.6, 140.3, 123.0, 120.2, 110.7, 102.2, 25.8, 18.4, -4.28. IR (neat)  $\nu_{\text{max}}$  2954 (m), 2924 (m), 2852 (m), 1595 (m), 1555 (m), 1468 (s), 1438 (s), 1401 (m), 1360 (w), 1269 (s), 1252 (s), 1210 (s), 1004 (m), 928 (s), 834 (s), 780 (s)  $\text{cm}^{-1}$ . MS (ESI +ve)  $m/z$  392 ( $[\text{M} + \text{H}]^+$ , 100%). HRMS (ESI +ve TOF) calcd for  $\text{C}_{13}\text{H}_{19}\text{INOSSi}^+$  391.9996, found 391.9997 ( $[\text{M} + \text{H}]^+$ ).

**6-((tert-butyldimethylsilyloxy)-2-((trimethylsilyl)ethynyl)benzo[d]thiazole 38.** To a solution of iodobenzothiazole **37** (200 mg, 0.51 mmol), PdCl<sub>2</sub>(PPh<sub>3</sub>)<sub>2</sub> (10 mg, 0.01 mmol), CuI (3 mg, 0.02 mmol), and triethylamine (0.46 mL, 3.30 mmol) in anhydrous DMF (2.0 mL) was added a solution of ethynyltrimethylsilane (100 mg, 1.02 mmol). The resulting mixture was stirred at 65 °C for 6 h. After cooling to rt, the solution was filtered through a layer of Celite, and concentrated. The residue was subjected to flash chromatography over SiO<sub>2</sub> gel (EtOAc/hexanes – 20:80) to afford the protected alkyne **38** (136 mg, 74%) as a brown oil. The product was used in the next reaction step immediately or stored in the freezer for a limited time due to stability issues. TLC (EtOAc/hexanes – 20:80): R<sub>f</sub> = 0.86. <sup>1</sup>H NMR (400 MHz, CDCl<sub>3</sub>) δ 7.88 (d, *J* = 8.5 Hz, 1H, H4), 7.25 (d, *J* = 2.5 Hz, 1H, H7), 7.01 (dd, *J* = 8.5, 2.5 Hz, 1H, H5), 1.00 (s, 9H, H2"), 0.30 (s, 9H, H3'), 0.22 (s, 6H, H1"). <sup>13</sup>C NMR (400 MHz, CDCl<sub>3</sub>) δ 155.0, 147.8, 146.2, 137.0, 124.3, 120.9, 112, 102.5, 97.1, 25.8, 18.4, -0.38, -4.25. IR (neat) ν<sub>max</sub> 2912 (m), 1610 (m), 1552 (m), 1461 (s), 1438 (s), 1404 (m), 1366 (w), 1289 (s), 1111 (m), 930 (s), 844 (s), 788 (s) cm<sup>-1</sup>. MS (ESI +ve) *m/z* 362 ([M + H]<sup>+</sup>, 100%). HRMS (ESI +ve TOF) calcd for C<sub>18</sub>H<sub>28</sub>NOSSi<sub>2</sub><sup>+</sup> 362.1425, found 362.1426 ([M + H]<sup>+</sup>).

**2-ethynylbenzo[d]thiazol-6-ol 39.** To a solution of the protected alkyne **38** (110 mg, 0.30 mmol) in MeOH (5.0 mL) was added KF (220 mg, 3.78 mmol), and the mixture was stirred at rt for 4 h. The solvent was removed, and the residue was purified by preparative TLC plate chromatography (CH<sub>2</sub>Cl<sub>2</sub>/MeOH – 90:10) to afford the free alkyne **39** (45 mg, 86%) as a pale yellow solid. TLC (CH<sub>2</sub>Cl<sub>2</sub>/MeOH – 90:10): R<sub>f</sub> = 0.10. Mp 101 °C (decomp). <sup>1</sup>H NMR (500 MHz, DMSO) δ 10.14 (s, 1H), 7.85 (d, *J* = 8.5 Hz, 1H), 7.74 (d, *J* = 2.5 Hz, 1H), 7.22 (dd, *J* = 8.5, 2.5 Hz, 1H), 4.33 (s, 1H). <sup>13</sup>C NMR (500 MHz, DMSO) δ 157.0, 145.7, 143.2, 136.3, 124.2, 117.0, 106.4, 87.1, 77.0. IR (neat) ν<sub>max</sub> 3310 (w), 2977 (w), 2188 (w), 2134 (w), 1732 (s), 1615 (w), 1589 (w), 1530 (m), 1480 (m), 1450 (m), 1394 (m), 1370 (m), 1254 (s), 1153 (s), 1097 (s), 1030 (m), 798 (m), 761 (m) cm<sup>-1</sup>. MS (ESI +ve) *m/z* 174 ([M – H]<sup>-</sup>, 100%). HRMS (ESI –ve TOF) calcd for C<sub>9</sub>H<sub>4</sub>NOS<sup>-</sup> 174.0019, found 174.0019 ([M – H]<sup>-</sup>).

**2-iodo-6-methylbenzo[d]thiazole 41.** To a solution of 6-methylbenzo[d]thiazol-2-amine **40** (4.11 g, 25.00 mmol) and *p*-toluenesulfonic acid monohydrate (15.07 g, 87.50 mmol) in MeCN (150 mL) was added a solution of NaNO<sub>2</sub> (4.45 g, 50.00 mmol) and KI (10.79 g, 65.00 mmol) in H<sub>2</sub>O (16 mL) at 0 °C. The reaction was allowed to reach rt, and was stirred for 18 h. The reaction mixture was quenched with H<sub>2</sub>O (350 mL) and basified with 2 M NaHCO<sub>3</sub> to pH 8-9, followed by addition of Na<sub>2</sub>S<sub>2</sub>O<sub>3</sub> (20 mL), yielding a light brown precipitate. The precipitate

was collected by filtration, washed with H<sub>2</sub>O (20 mL), and dried *in vacuo* to afford the iodobenzothiazole **41** (4.90 g, 71%) as a light orange solid. The product was used directly for the next step without further purification. TLC (EtOAc/hexanes – 60:40):  $R_f = 0.88$ . Mp 96 °C. <sup>1</sup>H NMR (400 MHz, CDCl<sub>3</sub>) δ 7.89 (d,  $J = 8.4$  Hz, 1H), 7.60 (br s, 1H), 7.23 (dd,  $J = 8.4, 1.6$  Hz, 1H), 2.46 (s, 3H). <sup>13</sup>C NMR (400 MHz, CDCl<sub>3</sub>) δ 152.6, 139.4, 136.0, 128.0, 122.1, 120.3, 104.3, 21.6. IR (neat)  $\nu_{\max}$  2910 (w), 1886 (w), 1609 (m), 1505 (m), 1428 (m), 1394 (m), 1307 (m), 1232 (m), 1056 (m), 1042 (w), 954 (s), 875 (m), 854 (m), 807 (s), 584 (s). MS (ESI +ve)  $m/z$  276 ([M + H]<sup>+</sup>, 100%). HRMS (ESI +ve TOF) calcd for C<sub>8</sub>H<sub>7</sub>INS<sup>+</sup> 275.9338, found 275.9344 ([M + H]<sup>+</sup>).

**6-methyl-2-((trimethylsilyl)ethynyl)benzo[d]thiazole 42.** To a solution of iodobenzothiazole **41** (1.76 g, 6.40 mmol), PdCl<sub>2</sub>(PPh<sub>3</sub>)<sub>2</sub> (90 mg, 0.13 mmol), CuI (26 mg, 0.14 mmol), and triethylamine (4.0 mL, 28.70 mmol) in anhydrous DMF (8.0 mL) was added a solution of ethynyltrimethylsilane (1.26 g, 12.83 mmol). The resulting mixture was stirred at 65 °C for 6 h. After cooling to rt, the solution was filtered through a layer of Celite, and concentrated. The residue was subjected to flash chromatography over SiO<sub>2</sub> gel (EtOAc/hexanes – 60:40) to afford the protected alkyne **42** (1.21 g, 76%) as a light yellow oil. The product was used in the next reaction step immediately or stored in the freezer for a limited time due to stability issues. TLC (EtOAc/hexanes – 60:40):  $R_f = 0.89$ . <sup>1</sup>H NMR (400 MHz, CDCl<sub>3</sub>) δ 7.91 (d,  $J = 8.4$  Hz, 1H), 7.62 (br s, 1H), 7.30 (dd,  $J = 8.4, 1.6$  Hz, 1H), 2.48 (s, 3H), 0.30 (s, 9H). <sup>13</sup>C NMR (400 MHz, CDCl<sub>3</sub>) δ 151.0, 147.3, 136.9, 135.6, 128.5, 123.3, 121.1, 102.7, 97.1, 21.7, 0.40. IR (neat)  $\nu_{\max}$  3215 (br), 2990 (w), 1608 (m), 1558 (m), 1493 (m), 1439 (m), 1384 (m), 1302 (m), 1211 (s), 1109 (m), 1053 (m), 922 (s), 877 (s), 708 (m). MS (ESI +ve)  $m/z$  246 ([M + H]<sup>+</sup>, 100%). HRMS (ESI +ve TOF) calcd for C<sub>13</sub>H<sub>16</sub>NSSi<sup>+</sup> 246.0767, found 246.0767 ([M + H]<sup>+</sup>).

**2-ethynyl-6-methylbenzo[d]thiazole 43.** To a solution of the protected alkyne **42** (0.94 g, 3.83 mmol) in MeOH (30 mL) was added KF (1.00 g, 17.21 mmol), and the mixture was stirred at rt for 2 h. The solvent was removed, and the residue was subjected to flash chromatography over SiO<sub>2</sub> gel (EtOAc/hexanes – 60:40) to afford the free alkyne **43** (0.64 g, 96%) as a pale yellow solid. TLC (EtOAc/hexanes – 60:40):  $R_f = 0.77$ . Mp 60 °C. <sup>1</sup>H NMR (400 MHz, CDCl<sub>3</sub>) δ 7.94 (d,  $J = 8.4$  Hz, 1H), 7.65 (br s, 1H), 7.32 (dd,  $J = 8.4, 1.6$  Hz, 1H), 3.56 (s, 1H), 2.49 (s, 3H). <sup>13</sup>C NMR (400 MHz, CDCl<sub>3</sub>) δ 150.9, 146.4, 137.2, 135.5, 128.8, 123.6, 121.1, 83.6, 77.0, 21.8. IR (neat)  $\nu_{\max}$  3185 (br), 2945 (w), 2103 (m), 1604 (m), 1552 (m), 1476 (m), 1401 (m), 1310 (m), 1247 (w), 1116 (s), 1052 (m), 1034 (m), 874 (m), 809 (s), 742 (m), 686 (m), 559 (s).



MS (ESI +ve)  $m/z$  174 ( $[M + H]^+$ , 100%). HRMS (ESI +ve TOF) calcd for  $C_{10}H_8NS^+$  174.0372, found 174.0377 ( $[M + H]^+$ ).

**1-(azidomethyl)-4-fluorobenzene 54.**<sup>2</sup> Following General Procedure B, alkyl bromide **44** (756 mg, 4.00 mmol) and  $NaN_3$  (390 mg, 6.00 mmol) were stirred in anhydrous DMF (20 mL) to afford the azide **54** (500 mg, 83%) as a pale yellow oil after flash chromatography ( $CH_2Cl_2/MeOH - 90:10$ ). The spectroscopic data was in agreement with that previously reported. TLC ( $CH_2Cl_2/MeOH - 90:10$ ):  $R_f = 0.71$ .  $^1H$  NMR (400 MHz,  $CDCl_3$ )  $\delta$  7.32 – 7.28 (m, 2H), 7.10 – 7.06 (m, 2H), 4.32 (s, 2H).  $^{13}C$  NMR (100 MHz,  $CDCl_3$ )  $\delta$  162.8 (d,  $^1J_{CF} = 245.0$  Hz), 131.3 (d,  $^4J_{CF} = 4.0$  Hz), 130.13 (d,  $^3J_{CF} = 8.0$  Hz), 115.9 (d,  $^2J_{CF} = 22.0$  Hz), 54.2. MS (ESI +ve)  $m/z$  152 ( $[M + H]^+$ , 100%).

**1-(azidomethyl)-3-fluorobenzene 55.**<sup>2</sup> Following General Procedure B, alkyl bromide **45** (756 mg, 4.00 mmol) and  $NaN_3$  (390 mg, 6.00 mmol) were stirred in anhydrous DMF (20 mL) to afford the azide **55** (455 mg, 75%) as a pale yellow oil after flash chromatography ( $CH_2Cl_2/MeOH - 90:10$ ). The spectroscopic data was in agreement with that previously reported. TLC ( $CH_2Cl_2/MeOH - 90:10$ ):  $R_f = 0.86$ .  $^1H$  NMR (400 MHz,  $CDCl_3$ )  $\delta$  7.40 – 7.33 (m, 1H), 7.12 – 7.02 (m, 3H), 4.35 (s, 2H).  $^{13}C$  NMR (100 MHz,  $CDCl_3$ )  $\delta$  163.1 (d,  $^1J_{CF} = 245.0$  Hz), 138.0 (d,  $^3J_{CF} = 7.0$  Hz), 130.6, 123.8, 115.2 (d,  $^2J_{CF} = 41.0$  Hz), 115.2, 54.2. MS (ESI +ve)  $m/z$  152 ( $[M + H]^+$ , 100%).

**1-(azidomethyl)-4-(trifluoromethyl)benzene 56.**<sup>3</sup> Following General Procedure B, alkyl bromide **46** (956 mg, 4.00 mmol) and  $NaN_3$  (390 mg, 6.00 mmol) were stirred in anhydrous DMF (20 mL) to afford the azide **56** (698 mg, 87%) as a pale yellow oil after flash chromatography ( $CH_2Cl_2/MeOH - 99:1$ ). The spectroscopic data was in agreement with that previously reported. TLC ( $CH_2Cl_2/MeOH - 99:1$ ):  $R_f = 0.67$ .  $^1H$  NMR (400 MHz,  $CDCl_3$ )  $\delta$  7.64 (d,  $J = 8.0$  Hz, 2H), 7.46 (d,  $J = 8.0$  Hz, 2H), 4.43 (s, 2H).  $^{13}C$  NMR (100 MHz,  $CDCl_3$ )  $\delta$  139.6, 130.7 (q,  $^2J_{CF} = 32.3$  Hz), 128.4, 126.0 (q,  $^3J_{CF} = 3.8$  Hz), 125.7 (q,  $^1J_{CF} = 270.4$  Hz), 54.3. MS (ESI +ve)  $m/z$  202 ( $[M + H]^+$ , 100%).

**Azidomethylbenzene 57.**<sup>2</sup> Following General Procedure B, alkyl bromide **47** (684 mg, 4.00 mmol) and  $NaN_3$  (390 mg, 6.00 mmol) were stirred in anhydrous DMF (20 mL) to afford the azide **57** (480 mg, 90%) as a pale yellow oil after flash chromatography ( $CH_2Cl_2/MeOH - 90:10$ ). The spectroscopic data was in agreement with that previously reported. TLC

(CH<sub>2</sub>Cl<sub>2</sub>/MeOH – 90:10): R<sub>f</sub> = 0.86. <sup>1</sup>H NMR (400 MHz, CDCl<sub>3</sub>) δ 7.43 – 7.33 (m, 5H), 4.35 (s, 2H). <sup>13</sup>C NMR (400 MHz, CDCl<sub>3</sub>) δ 135.5, 129.0, 128.4, 128.3, 54.9. MS (ESI +ve) *m/z* 134 ([M + H]<sup>+</sup>, 100%).

**1-(azidomethyl)-4-nitrobenzene 58.**<sup>3</sup> Following General Procedure B, alkyl bromide **48** (864 mg, 4.00 mmol) and NaN<sub>3</sub> (390 mg, 6.00 mmol) were stirred in anhydrous DMF (20 mL) to afford the azide **58** (550 mg, 77%) as a yellow oil after flash chromatography (CH<sub>2</sub>Cl<sub>2</sub>/MeOH – 90:10). The spectroscopic data was in agreement with that previously reported. TLC (CH<sub>2</sub>Cl<sub>2</sub>/MeOH – 90:10): R<sub>f</sub> = 0.65. <sup>1</sup>H NMR (400 MHz, CDCl<sub>3</sub>) δ 8.20 (d, *J* = 8.8 Hz, 2H), 7.49 (d, *J* = 8.8 Hz, 2H), 4.49 (s, 2H). <sup>13</sup>C NMR (400 MHz, CDCl<sub>3</sub>) δ 147.7, 142.8, 128.6, 124.0, 53.7. MS (ESI +ve) *m/z* 179 ([M + H]<sup>+</sup>, 100%).

**4-(azidomethyl)benzonitrile 59.**<sup>2</sup> Following General Procedure B, alkyl bromide **49** (784 mg, 4.00 mmol) and NaN<sub>3</sub> (390 mg, 6.00 mmol) were stirred in anhydrous DMF (20 mL) to afford the azide **59** (490 mg, 77%) as a yellow oil after flash chromatography (CH<sub>2</sub>Cl<sub>2</sub>/MeOH – 90:10). The spectroscopic data was in agreement with that previously reported. TLC (CH<sub>2</sub>Cl<sub>2</sub>/MeOH – 90:10): R<sub>f</sub> = 0.88. <sup>1</sup>H NMR (400 MHz, CDCl<sub>3</sub>) δ 7.67 (d, *J* = 8.8 Hz, 2H), 7.43 (d, *J* = 8.8 Hz, 2H), 4.44 (s, 2H). <sup>13</sup>C NMR (400 MHz, CDCl<sub>3</sub>) δ 140.9, 132.7, 128.6, 118.5, 112.3, 54.1. MS (ESI +ve) *m/z* 159 ([M + H]<sup>+</sup>, 100%).

**1-(2-azidoethyl)-4-fluorobenzene 60.**<sup>2</sup> Following General Procedure B, alkyl bromide **50** (812 mg, 4.00 mmol) and NaN<sub>3</sub> (390 mg, 6.00 mmol) were stirred in anhydrous DMF (20 mL) to afford the azide **60** (488 mg, 74%) as a pale yellow oil after flash chromatography (CH<sub>2</sub>Cl<sub>2</sub>/MeOH – 90:10). The spectroscopic data was in agreement with that previously reported. TLC (CH<sub>2</sub>Cl<sub>2</sub>/MeOH – 90:10): R<sub>f</sub> = 0.69. <sup>1</sup>H NMR (400 MHz, CDCl<sub>3</sub>) δ 7.20 – 7.16 (m, 2H), 7.03 – 6.99 (m, 2H), 3.49 (t, *J* = 6.8 Hz, 2H), 2.87 (t, *J* = 6.8 Hz, 2H). <sup>13</sup>C NMR (100 MHz, CDCl<sub>3</sub>) δ 162.0 (d, <sup>1</sup>*J*<sub>CF</sub> = 245.0 Hz), 133.9 (d, <sup>4</sup>*J*<sub>CF</sub> = 4.0 Hz), 130.36 (d, <sup>3</sup>*J*<sub>CF</sub> = 8.0 Hz), 115.6 (d, <sup>2</sup>*J*<sub>CF</sub> = 22.0 Hz), 52.6, 34.7. MS (ESI +ve) *m/z* 166 ([M + H]<sup>+</sup>, 100%).

**1-(2-azidoethyl)-4-(trifluoromethyl)benzene 61.**<sup>4</sup> Following General Procedure B, alkyl bromide **51** (1.01 g, 4.00 mmol) and NaN<sub>3</sub> (390 mg, 6.00 mmol) were stirred in anhydrous DMF (20 mL) to afford the azide **61** (711 mg, 83%) as a pale yellow oil after flash chromatography (CH<sub>2</sub>Cl<sub>2</sub>/MeOH – 90:10). The spectroscopic data was in agreement with that previously reported. TLC (CH<sub>2</sub>Cl<sub>2</sub>/MeOH – 90:10): R<sub>f</sub> = 0.77. <sup>1</sup>H NMR (500 MHz, CDCl<sub>3</sub>) δ

7.59 (d,  $J = 6.4$  Hz, 2H), 7.34 (d,  $J = 6.4$  Hz, 2H), 3.55 (t,  $J = 5.6$  Hz, 2H), 2.95 (t,  $J = 5.6$  Hz, 2H).  $^{13}\text{C}$  NMR (125 MHz,  $\text{CDCl}_3$ )  $\delta$  142.3, 129.4 (q,  $^2J_{\text{CF}} = 32.3$  Hz), 129.3, 125.7 (q,  $^3J_{\text{CF}} = 3.8$  Hz), 125.6 (q,  $^1J_{\text{CF}} = 270.4$  Hz), 52.1, 35.3. MS (ESI +ve)  $m/z$  216 ( $[\text{M} + \text{H}]^+$ , 100%).

**4-(2-azidoethyl)phenol 62.**<sup>2</sup> Following General Procedure B, alkyl bromide **52** (805 mg, 4.00 mmol) and  $\text{NaN}_3$  (390 mg, 6.00 mmol) were stirred in anhydrous DMF (20 mL) to afford the azide **62** (511 mg, 78%) as a colourless oil after flash chromatography ( $\text{CH}_2\text{Cl}_2/\text{MeOH} - 90:10$ ). The spectroscopic data was in agreement with that previously reported. TLC ( $\text{CH}_2\text{Cl}_2/\text{MeOH} - 90:10$ ):  $R_f = 0.60$ .  $^1\text{H}$  NMR (400 MHz,  $\text{CDCl}_3$ )  $\delta$  7.09 (d,  $J = 8.8$  Hz, 2H), 6.79 (d,  $J = 8.8$  Hz, 2H), 5.15 (s, 1H), 3.46 (t,  $J = 7.2$  Hz, 2H), 2.83 (t,  $J = 7.2$  Hz, 2H).  $^{13}\text{C}$  NMR (400 MHz,  $\text{CDCl}_3$ )  $\delta$  154.5, 130.3, 130.1, 115.6, 52.8, 34.6. MS (ESI +ve)  $m/z$  164 ( $[\text{M} + \text{H}]^+$ , 100%).

**1-(2-azidoethyl)-4-nitrobenzene 63.**<sup>5</sup> Following General Procedure B, alkyl bromide **53** (920 mg, 4.00 mmol) and  $\text{NaN}_3$  (390 mg, 6.00 mmol) were stirred in anhydrous DMF (20 mL) to afford the azide **63** (601 mg, 78%) as a yellow oil after flash chromatography ( $\text{CH}_2\text{Cl}_2/\text{MeOH} - 95:5$ ). The spectroscopic data was in agreement with that previously reported. TLC ( $\text{CH}_2\text{Cl}_2/\text{MeOH} - 95:5$ ):  $R_f = 0.63$ .  $^1\text{H}$  NMR (400 MHz,  $\text{CDCl}_3$ )  $\delta$  8.17 (d,  $J = 7.2$  Hz, 2H), 7.40 (d,  $J = 7.2$  Hz, 2H), 3.58 (t,  $J = 5.2$  Hz, 2H), 2.99 (t,  $J = 5.2$  Hz, 2H).  $^{13}\text{C}$  NMR (400 MHz,  $\text{CDCl}_3$ )  $\delta$  147.1, 145.9, 129.8, 123.9, 51.8, 35.3. MS (ESI +ve)  $m/z$  193 ( $[\text{M} + \text{H}]^+$ , 100%).

**2-(1-(4-fluorobenzyl)-1H-1,2,3-triazol-4-yl)-6-methoxybenzo[*d*]thiazole 64.** Following General Procedure A<sub>1</sub>, alkyne **25** (40 mg, 0.21 mmol),  $\text{CuSO}_4 \cdot 5\text{H}_2\text{O}$  (5 mg, 0.02 mmol), sodium ascorbate (8 mg, 0.04 mmol), and azide **54** (64 mg, 0.42 mmol) were stirred in *t*-BuOH/ $\text{H}_2\text{O}$  (1:1, 4.2 mL) to afford the 1,4-disubstituted-1,2,3-triazole **64** (55 mg, 77%) as a pale yellow solid after preparative TLC plate chromatography ( $\text{CH}_2\text{Cl}_2/\text{MeOH} - 98:2$ ). TLC ( $\text{CH}_2\text{Cl}_2/\text{MeOH} - 98:2$ ):  $R_f = 0.55$ . Mp 175 °C.  $^1\text{H}$  NMR (500 MHz, DMSO)  $\delta$  8.95 (s, 1H), 7.90 (d,  $J = 9.0$  Hz, 1H), 7.73 (d,  $J = 2.4$  Hz, 1H), 7.51 – 7.47 (m, 2H), 7.26 – 7.22 (m, 2H), 7.15 (dd,  $J = 9.0, 2.4$  Hz, 1H), 5.84 (s, 2H), 3.85 (s, 3H).  $^{13}\text{C}$  NMR (125 MHz, DMSO)  $\delta$  162.0 (d,  $^1J_{\text{CF}} = 243.3$  Hz), 157.6, 156.3, 147.6, 142.3, 135.4, 131.8 (d,  $^4J_{\text{CF}} = 2.8$  Hz), 130.5 (d,  $^3J_{\text{CF}} = 8.6$  Hz), 123.4, 123.1, 115.8 (d,  $^2J_{\text{CF}} = 44.4$  Hz), 115.8, 104.9, 55.7, 52.5. IR (neat)  $\nu_{\text{max}}$  3200 (w), 2831 (w), 2230 (w), 1605 (m), 1580 (w), 1557 (m), 1508 (m), 1489 (m), 1465 (m), 1435 (s), 1259 (s), 1219 (m), 1184 (m), 1157 (m), 1128 (s), 948 (m), 887 (s)  $\text{cm}^{-1}$ . MS (ESI +ve)  $m/z$

341 ( $[M + H]^+$ , 100%); (ESI  $-ve$ )  $m/z$  339 ( $[M - H]^-$ , 100%). HRMS (ESI  $+ve$  TOF) calcd for  $C_{17}H_{14}FN_4OS^+$  341.0867, found 341.0872 ( $[M + H]^+$ ).

**2-(1-(4-fluorophenethyl)-1H-1,2,3-triazol-4-yl)-6-methoxybenzo[d]thiazole 65.** Following **General Procedure A<sub>1</sub>**, alkyne **25** (40 mg, 0.21 mmol),  $CuSO_4 \cdot 5H_2O$  (5 mg, 0.02 mmol), sodium ascorbate (8 mg, 0.04 mmol), and azide **60** (69 mg, 0.42 mmol) were stirred in *t*-BuOH/ $H_2O$  (1:1, 4.2 mL) to afford the 1,4-disubstituted-1,2,3-triazole **65** (51 mg, 69%) as a pale yellow solid after preparative TLC plate chromatography ( $CH_2Cl_2/MeOH - 98:2$ ). TLC ( $CH_2Cl_2/MeOH - 98:2$ ):  $R_f = 0.57$ . Mp 149 °C.  $^1H$  NMR (400 MHz, DMSO)  $\delta$  8.80 (s, 1H), 7.89 (d,  $J = 9.0$  Hz, 1H), 7.72 (d,  $J = 2.4$  Hz, 1H), 7.28 – 7.24 (m, 2H), 7.14 – 7.10 (m, 2H), 7.09 (dd,  $J = 9.0, 2.4$  Hz, 1H), 4.73 (t,  $J = 7.2$  Hz, 2H), 3.85 (s, 3H), 3.25 (t,  $J = 7.2$  Hz, 2H).  $^{13}C$  NMR (100 MHz, DMSO)  $\delta$  161.1 (d,  $^1J_{CF} = 240.7$  Hz), 157.5, 156.5, 147.6, 141.9, 135.3, 133.6 (d,  $^4J_{CF} = 3.1$  Hz), 130.6 (d,  $^3J_{CF} = 8.0$  Hz), 123.3, 123.1, 115.9, 115.2 (d,  $^2J_{CF} = 21.0$  Hz), 104.9, 55.7, 50.9, 34.5. IR (neat)  $\nu_{max}$  3107 (w), 2841 (w), 2229 (w), 1610 (m), 1582 (m), 1554 (m), 1489 (m), 1466 (m), 1437 (s), 1325 (m), 1278 (s), 1215 (s), 1161 (m), 1116 (m), 943 (m), 877 (s)  $cm^{-1}$ . MS (ESI  $+ve$ )  $m/z$  355 ( $[M + H]^+$ , 100%). HRMS (ESI  $+ve$  TOF) calcd for  $C_{18}H_{16}FN_4OS^+$  355.1023, found 355.1029 ( $[M + H]^+$ ).

**2-(1-(3-fluorobenzyl)-1H-1,2,3-triazol-4-yl)-6-methoxybenzo[d]thiazole 66.** Following **General Procedure A<sub>1</sub>**, alkyne **25** (40 mg, 0.21 mmol),  $CuSO_4 \cdot 5H_2O$  (5 mg, 0.02 mmol), sodium ascorbate (8 mg, 0.04 mmol), and azide **55** (63 mg, 0.42 mmol) were stirred in *t*-BuOH/ $H_2O$  (1:1, 4.2 mL) to afford the 1,4-disubstituted-1,2,3-triazole **66** (60 mg, 84%) as a pale yellow solid after preparative TLC plate chromatography ( $CH_2Cl_2/MeOH - 98:2$ ). TLC ( $CH_2Cl_2/MeOH - 98:2$ ):  $R_f = 0.50$ . Mp 170 °C.  $^1H$  NMR (400 MHz, DMSO)  $\delta$  8.98 (s, 1H), 7.90 (d,  $J = 9.0$  Hz, 1H), 7.73 (d,  $J = 2.4$  Hz), 7.46 – 7.42 (m, 1H), 7.30 – 7.18 (m, 3H), 7.14 (dd,  $J = 9.0, 2.4$  Hz, 1H), 4.74 (s, 2H), 3.85 (s, 3H).  $^{13}C$  NMR (100 MHz, DMSO)  $\delta$  162.2 (d,  $^1J_{CF} = 243.0$  Hz), 157.6, 156.6, 147.6, 142.3, 138.2 (d,  $^3J_{CF} = 7.8$  Hz), 135.4, 131.0, 130.9, 124.2, 123.7, 116.0, 115.1 (d,  $^2J_{CF} = 40.4$  Hz), 115.1, 104.9, 55.7, 52.6. IR (neat)  $\nu_{max}$  3121 (w), 2840 (w), 2220 (w), 1608 (m), 1582 (m), 1553 (m), 1490 (m), 1460 (m), 1431 (s), 1319 (m), 1268 (s), 1211 (s), 1159 (m), 1130 (m), 943 (m), 878 (s)  $cm^{-1}$ . MS (ESI  $+ve$ )  $m/z$  341 ( $[M + H]^+$ , 100%); (ESI  $-ve$ )  $m/z$  339 ( $[M - H]^-$ , 100%). HRMS (ESI  $+ve$  TOF) calcd for  $C_{17}H_{14}FN_4OS^+$  341.0867, found 341.0872 ( $[M + H]^+$ ).

**6-methoxy-2-(1-(4-(trifluoromethyl)benzyl)-1*H*-1,2,3-triazol-4-yl)benzo[*d*]thiazole 67.** Following General Procedure A<sub>1</sub>, alkyne **25** (40 mg, 0.21 mmol), CuSO<sub>4</sub>·5H<sub>2</sub>O (5 mg, 0.02 mmol), sodium ascorbate (8 mg, 0.04 mmol), and azide **56** (84 mg, 0.42 mmol) were stirred in *t*-BuOH/H<sub>2</sub>O (1:1, 4.2 mL) to afford the 1,4-disubstituted-1,2,3-triazole **67** (61 mg, 74%) as a pale yellow solid after preparative TLC plate chromatography (CH<sub>2</sub>Cl<sub>2</sub>/MeOH – 98:2). TLC (CH<sub>2</sub>Cl<sub>2</sub>/MeOH – 98:2): R<sub>f</sub> = 0.66. Mp 174 °C. <sup>1</sup>H NMR (400 MHz, DMSO) δ 9.01 (s, 1H), 7.90 (d, *J* = 8.8 Hz, 1H), 7.78 (d, *J* = 8.0 Hz, 2H), 7.74 (d, *J* = 2.4 Hz, 1H), 7.60 (d, *J* = 8.0 Hz, 2H), 7.14 (dd, *J* = 8.8, 2.4 Hz, 1H), 5.85 (s, 2H), 3.85 (s, 3H). <sup>13</sup>C NMR (100 MHz, DMSO) δ 158.1, 156.7, 148.1, 142.9, 140.7, 135.9, 129.3, 129.3 (q, <sup>2</sup>J<sub>CF</sub> = 31.8 Hz), 126.3 (q, <sup>3</sup>J<sub>CF</sub> = 3.8 Hz), 125.0 (q, <sup>1</sup>J<sub>CF</sub> = 270.4 Hz), 124.3, 123.6, 116.5, 105.4, 56.2, 53.1. IR (neat) ν<sub>max</sub> 3142 (w), 2841 (w), 2215 (w), 1608 (m), 1579 (m), 1553 (m), 1491 (m), 1459 (m), 1436 (s), 1324 (m), 1272 (s), 1215 (s), 1160 (m), 1120 (m), 948 (m), 874 (s) cm<sup>-1</sup>. MS (ESI +ve) *m/z* 391 ([M + H]<sup>+</sup>, 100%); (ESI –ve) *m/z* 389 ([M – H]<sup>-</sup>, 100%). HRMS (ESI +ve TOF) calcd for C<sub>18</sub>H<sub>14</sub>F<sub>3</sub>N<sub>4</sub>OS<sup>+</sup> 391.0835, found 391.0840 ([M + H]<sup>+</sup>).

**6-methoxy-2-(1-(4-(trifluoromethyl)phenethyl)-1*H*-1,2,3-triazol-4-yl)benzo[*d*]thiazole 68.** Following General Procedure A<sub>1</sub>, alkyne **25** (40 mg, 0.21 mmol), CuSO<sub>4</sub>·5H<sub>2</sub>O (5 mg, 0.02 mmol), sodium ascorbate (8 mg, 0.04 mmol), and azide **61** (90 mg, 0.42 mmol) were stirred in *t*-BuOH/H<sub>2</sub>O (1:1, 4.2 mL) to afford the 1,4-disubstituted-1,2,3-triazole **68** (60 mg, 71%) as a pale yellow solid after preparative TLC plate chromatography (CH<sub>2</sub>Cl<sub>2</sub>/MeOH – 98:2). TLC (CH<sub>2</sub>Cl<sub>2</sub>/MeOH – 98:2): R<sub>f</sub> = 0.71. Mp 167 °C. <sup>1</sup>H NMR (500 MHz, DMSO) δ 8.86 (s, 1H), 7.89 (d, *J* = 8.8 Hz, 1H), 7.72 (d, *J* = 2.4 Hz, 1H), 7.65 (d, *J* = 8.0 Hz, 2H), 7.47 (d, *J* = 8.0 Hz, 2H), 7.13 (dd, *J* = 8.8, 2.4 Hz, 1H), 4.80 (t, *J* = 5.6 Hz, 2H), 3.85 (s, 3H), 3.37 (t, *J* = 5.6 Hz, 2H). <sup>13</sup>C NMR (125 MHz, DMSO) δ 157.6, 156.4, 147.6, 142.4, 142.0, 135.3, 129.6, 127.4 (q, <sup>2</sup>J<sub>CF</sub> = 31.8 Hz), 125.3 (q, <sup>3</sup>J<sub>CF</sub> = 3.8 Hz), 124.6 (q, <sup>1</sup>J<sub>CF</sub> = 270.4 Hz), 123.3, 123.1, 115.9, 104.9, 55.7, 50.4, 35.0. IR (neat) ν<sub>max</sub> 3107 (w), 2922 (w), 2229 (w), 1606 (m), 1570 (m), 1516 (s), 1484 (m), 1452 (m), 1344 (s), 1312 (m), 1228 (m), 1178 (m), 1130 (m), 1106 (m), 948 (s), 882 (s) cm<sup>-1</sup>. MS (ESI +ve) *m/z* 405 ([M + H]<sup>+</sup>, 100%); (ESI –ve) *m/z* 403 ([M – H]<sup>-</sup>, 100%). HRMS (ESI +ve TOF) calcd for C<sub>19</sub>H<sub>16</sub>F<sub>3</sub>N<sub>4</sub>OS<sup>+</sup> 405.0991, found 405.0997 ([M + H]<sup>+</sup>).

**2-(1-benzyl-1*H*-1,2,3-triazol-4-yl)-6-methoxybenzo[*d*]thiazole 69.** Following General Procedure A<sub>1</sub>, alkyne **25** (40 mg, 0.21 mmol), CuSO<sub>4</sub>·5H<sub>2</sub>O (5 mg, 0.02 mmol), sodium ascorbate (8 mg, 0.04 mmol), and azide **57** (56 mg, 0.42 mmol) were stirred in *t*-BuOH/H<sub>2</sub>O (1:1, 4.2 mL) to afford the 1,4-disubstituted-1,2,3-triazole **69** (58 mg, 86%) as a pale yellow

solid after preparative TLC plate chromatography (CH<sub>2</sub>Cl<sub>2</sub>/MeOH – 98:2). TLC (CH<sub>2</sub>Cl<sub>2</sub>/MeOH – 98:2): R<sub>f</sub> = 0.67. Mp 162 °C. <sup>1</sup>H NMR (500 MHz, DMSO) δ 8.95 (s, 1H), 7.90 (d, *J* = 9.0 Hz, 1H), 7.73 (d, *J* = 3.0 Hz, 1H), 7.34 – 7.12 (m, 5H), 7.13 (dd, *J* = 9.0, 3.0 Hz, 1H), 5.71 (s, 2H), 3.85 (s, 3H). <sup>13</sup>C NMR (500 MHz, DMSO) δ 157.6, 156.3, 147.6, 142.3, 135.6, 135.4, 128.9, 128.3, 128.1, 123.5, 123.1, 116.0, 104.9, 55.7, 53.3. IR (neat) ν<sub>max</sub> 3140 (w), 2980 (w), 2241 (w), 1607 (s), 1576 (m), 1556 (m), 1489 (m), 1465 (m), 1430 (m), 1322 (s), 1255 (s), 1222 (m), 1180 (s), 1040 (m), 1026 (m), 945 (m), 887 (s) cm<sup>-1</sup>. MS (ESI +ve) *m/z* 323 ([M + H]<sup>+</sup>, 100%). HRMS (ESI +ve TOF) calcd for C<sub>17</sub>H<sub>15</sub>N<sub>4</sub>OS<sup>+</sup> 323.0961, found 323.0967 ([M + H]<sup>+</sup>).

**4-(2-(4-(6-methoxybenzo[*d*]thiazol-2-yl)-1*H*-1,2,3-triazol-1-yl)ethyl)phenol 70.** Following **General Procedure A<sub>2</sub>**, alkyne **25** (40 mg, 0.21 mmol), CuSO<sub>4</sub>·5H<sub>2</sub>O (5 mg, 0.02 mmol), sodium ascorbate (8 mg, 0.04 mmol), and azide **62** (69 mg, 0.42 mmol) were stirred in *t*-BuOH/H<sub>2</sub>O (1:1, 4.2 mL) to afford the 1,4-disubstituted-1,2,3-triazole **70** (52 mg, 70%) as a white solid after sequential trituration with CH<sub>2</sub>Cl<sub>2</sub>, MeCN, and hot MeOH. TLC (CH<sub>2</sub>Cl<sub>2</sub>/MeOH – 90:10): R<sub>f</sub> = 0.05. Mp 160 °C (decomp). <sup>1</sup>H NMR (400 MHz, DMSO) δ 9.25 (s, 1H), 8.74 (s, 1H), 7.89 (d, *J* = 8.8 Hz, 1H), 7.72 (d, *J* = 2.4 Hz, 1H), 7.13 (dd, *J* = 8.8, 2.4 Hz), 7.00 (d, *J* = 8.4 Hz, 2H), 6.66 (d, *J* = 8.4 Hz, 2H), 4.66 (t, *J* = 7.2 Hz, 2H), 3.85 (s, 3H), 3.12 (t, *J* = 7.2 Hz, 2H). <sup>13</sup>C NMR (400 MHz, DMSO) δ 157.5, 156.5, 156.0, 147.6, 141.8, 135.3, 129.6, 127.3, 123.2, 123.1, 115.9, 115.2, 104.9, 55.7, 51.3, 34.7. IR (neat) ν<sub>max</sub> 3133 (w), 2981 (w), 2092 (br), 1610 (m), 1555 (m), 1516 (m), 1489 (m), 1463 (m), 1378 (w), 1356 (w), 1320 (s), 1238 (s), 1216 (m), 1131 (m), 1102 (m), 950 (m), 864 (s) cm<sup>-1</sup>. MS (ESI +ve) *m/z* 353 ([M + H]<sup>+</sup>, 100%); (ESI –ve) *m/z* 351 ([M – H]<sup>-</sup>, 100%). HRMS (ESI +ve TOF) calcd for C<sub>18</sub>H<sub>17</sub>N<sub>4</sub>O<sub>2</sub>S<sup>+</sup> 353.1067, found 353.1072 ([M + H]<sup>+</sup>).

**6-methoxy-2-(1-(4-nitrobenzyl)-1*H*-1,2,3-triazol-4-yl)benzo[*d*]thiazole 71.** Following **General Procedure A<sub>2</sub>**, alkyne **25** (40 mg, 0.21 mmol), CuSO<sub>4</sub>·5H<sub>2</sub>O (5 mg, 0.02 mmol), sodium ascorbate (8 mg, 0.04 mmol), and azide **58** (75 mg, 0.42 mmol) were stirred in *t*-BuOH/H<sub>2</sub>O (1:1, 4.2 mL) to afford the 1,4-disubstituted-1,2,3-triazole **71** (61 mg, 79%) as a pale yellow solid after sequential trituration with CH<sub>2</sub>Cl<sub>2</sub>, MeCN, and hot MeOH. TLC (CH<sub>2</sub>Cl<sub>2</sub>/MeOH – 90:10): R<sub>f</sub> = 0.24. Mp 162 °C (decomp). <sup>1</sup>H NMR (400 MHz, DMSO) δ 8.85 (s, 1H), 8.23 (d, *J* = 8.4 Hz, 2H), 7.89 (d, *J* = 8.8 Hz, 1H), 7.66 (d, *J* = 2.4 Hz, 1H), 7.65 (d, *J* = 8.4 Hz, 2H), 7.14 (dd, *J* = 8.8, 2.4 Hz, 1H), 5.88 (s, 2H), 3.89 (s, 3H). <sup>13</sup>C NMR (500 MHz, DMSO) δ 157.6, 156.2, 147.6, 147.3, 142.9, 142.4, 135.4, 129.2, 124.0, 123.2, 122.3, 116.0,

104.9, 55.7, 52.4. IR (neat)  $\nu_{\max}$  3121 (w), 2900 (w), 2089 (w), 1610 (m), 1555 (s), 1516 (s), 1489 (m), 1432 (m), 1378 (s), 1356 (m), 1320 (m), 1272 (s), 1215 (s), 1174 (s), 1044 (m), 1027 (m), 949 (m), 818 (m)  $\text{cm}^{-1}$ . MS (ESI +ve)  $m/z$  368 ( $[\text{M} + \text{H}]^+$ , 100%). HRMS (ESI +ve TOF) calcd for  $\text{C}_{17}\text{H}_{14}\text{N}_5\text{O}_3\text{S}^+$  368.0812, found 368.0817 ( $[\text{M} + \text{H}]^+$ ).

**6-methoxy-2-(1-(4-nitrophenethyl)-1*H*-1,2,3-triazol-4-yl)benzo[*d*]thiazole 72.** Following **General Procedure A<sub>2</sub>**, alkyne **25** (40 mg, 0.21 mmol),  $\text{CuSO}_4 \cdot 5\text{H}_2\text{O}$  (5 mg, 0.02 mmol), sodium ascorbate (8 mg, 0.04 mmol), and azide **63** (81 mg, 0.42 mmol) were stirred in *t*-BuOH/ $\text{H}_2\text{O}$  (1:1, 4.2 mL) to afford the 1,4-disubstituted-1,2,3-triazole **72** (60 mg, 75%) as a pale yellow solid after sequential trituration with  $\text{CH}_2\text{Cl}_2$ , MeCN, and hot MeOH. TLC ( $\text{CH}_2\text{Cl}_2/\text{MeOH} - 90:10$ ):  $R_f = 0.22$ . Mp 172 °C (decomp).  $^1\text{H}$  NMR (400 MHz, DMSO)  $\delta$  8.85 (s, 1H), 8.15 (d,  $J = 8.4$  Hz, 2H), 7.89 (d,  $J = 8.8$  Hz, 1H), 7.72 (d,  $J = 2.8$  Hz, 1H), 7.53 (d,  $J = 8.4$  Hz, 2H), 7.13 (dd,  $J = 8.8, 2.8$  Hz, 1H), 4.83 (t,  $J = 7.2$  Hz, 2H), 3.85 (s, 3H), 3.43 (t,  $J = 7.2$  Hz, 2H).  $^{13}\text{C}$  NMR (400 MHz, DMSO)  $\delta$  157.6, 156.4, 147.6, 146.4, 145.7, 142.0, 135.3, 130.1, 123.5, 123.3, 123.1, 115.9, 104.9, 55.7, 50.2, 34.9. IR (neat)  $\nu_{\max}$  3131 (w), 2924 (w), 1604 (m), 1558 (s), 1512 (s), 1490 (m), 1438 (m), 1374 (s), 1342 (m), 1315 (m), 1259 (s), 1226 (s), 1178 (s), 1040 (m), 1021 (m), 945 (m), 827 (m)  $\text{cm}^{-1}$ . MS (ESI +ve)  $m/z$  382 ( $[\text{M} + \text{H}]^+$ , 100%). HRMS (ESI +ve TOF) calcd for  $\text{C}_{18}\text{H}_{16}\text{N}_5\text{O}_3\text{S}^+$  382.0968, found 382.0974 ( $[\text{M} + \text{H}]^+$ ).

**4-((4-(6-methoxybenzo[*d*]thiazol-2-yl)-1*H*-1,2,3-triazol-1-yl)methyl)benzonitrile 73.** Following **General Procedure A<sub>1</sub>**, alkyne **25** (40 mg, 0.21 mmol),  $\text{CuSO}_4 \cdot 5\text{H}_2\text{O}$  (5 mg, 0.02 mmol), sodium ascorbate (8 mg, 0.04 mmol), and azide **59** (66 mg, 0.42 mmol) were stirred in *t*-BuOH/ $\text{H}_2\text{O}$  (1:1, 4.2 mL) to afford the 1,4-disubstituted-1,2,3-triazole **73** (53 mg, 73%) as a pale yellow solid after preparative TLC plate chromatography ( $\text{CH}_2\text{Cl}_2/\text{MeOH} - 90:10$ ). TLC ( $\text{CH}_2\text{Cl}_2/\text{MeOH} - 90:10$ ):  $R_f = 0.25$ . Mp 178 °C (decomp).  $^1\text{H}$  NMR (400 MHz, DMSO)  $\delta$  9.00 (s, 1H), 7.92 (d,  $J = 8.8$  Hz, 1H), 7.87 (d,  $J = 8.4$  Hz, 2H), 7.73 (d,  $J = 2.4$  Hz, 1H), 7.56 (d,  $J = 8.4$  Hz, 2H), 7.15 (dd,  $J = 8.8, 2.4$  Hz, 1H), 5.84 (s, 2H), 3.85 (s, 3H).  $^{13}\text{C}$  NMR (400 MHz, DMSO)  $\delta$  157.6, 156.2, 147.6, 142.4, 140.9, 135.4, 132.8, 128.8, 123.9, 123.2, 118.5, 116.0, 111.1, 104.9, 55.8, 52.6. IR (neat)  $\nu_{\max}$  3143 (w), 2231 (w), 1607 (s), 1580 (m), 1509 (m), 1490 (m), 1459 (m), 1375 (w), 1253 (s), 1228 (s), 1038 (m), 1023 (m), 950 (m), 874 (s), 824 (m)  $\text{cm}^{-1}$ . MS (ESI +ve)  $m/z$  348 ( $[\text{M} + \text{H}]^+$ , 100%), 370 ( $[\text{M} + \text{Na}]^+$ , 20%); (ESI -ve)  $m/z$  346 ( $[\text{M} - \text{H}]^-$ , 100%). HRMS (ESI +ve TOF) calcd for  $\text{C}_{18}\text{H}_{14}\text{N}_5\text{OS}^+$  348.0914, found 348.0919 ( $[\text{M} + \text{H}]^+$ ).

**2-(1-(4-fluorobenzyl)-1*H*-1,2,3-triazol-4-yl)-6-methylbenzo[*d*]thiazole 74.** Following **General Procedure A<sub>1</sub>**, alkyne **43** (36 mg, 0.21 mmol), CuSO<sub>4</sub>·5H<sub>2</sub>O (5 mg, 0.02 mmol), sodium ascorbate (8 mg, 0.04 mmol), and azide **54** (63 mg, 0.42 mmol) were stirred in *t*-BuOH/H<sub>2</sub>O (1:1, 4.2 mL) to afford the 1,4-disubstituted-1,2,3-triazole **74** (53 mg, 78%) as a pale yellow solid after preparative TLC plate chromatography (CH<sub>2</sub>Cl<sub>2</sub>/MeOH – 98:2). TLC (CH<sub>2</sub>Cl<sub>2</sub>/MeOH – 98:2): R<sub>f</sub> = 0.84. Mp 184 °C. <sup>1</sup>H NMR (400 MHz, DMSO) δ 8.99 (s, 1H), 7.93 (br s, 1H), 7.89 (d, *J* = 9.0 Hz, 1H), 7.51 – 7.47 (m, 2H), 7.35 (dd, *J* = 9.0, 2.4 Hz, 1H), 7.27 – 7.22 (m, 2H), 5.71 (s, 2H), 2.45 (s, 3H). <sup>13</sup>C NMR (100 MHz, DMSO) δ 162.0 (d, <sup>1</sup>J<sub>CF</sub> = 243.3 Hz), 157.8, 151.3, 142.3, 135.4, 134.0, 131.8 (d, <sup>4</sup>J<sub>CF</sub> = 2.8 Hz), 130.5 (d, <sup>3</sup>J<sub>CF</sub> = 8.6 Hz), 128.1, 123.77, 122.2, 121.9, 115.7 (d, <sup>2</sup>J<sub>CF</sub> = 44.4 Hz), 52.5, 21.0. IR (neat) ν<sub>max</sub> 3123 (w), 2912 (w), 1605 (m), 1551 (m), 1508 (m), 1486 (m), 1461 (m), 1435 (s), 1353 (m), 1333 (m), 1221 (s), 1158 (m), 1128 (m), 1117 (s), 1090 (m), 950 (m), 818 (s) cm<sup>-1</sup>. MS (ESI +ve) *m/z* 325 ([M + H]<sup>+</sup>, 100%). HRMS (ESI +ve TOF) calcd for C<sub>17</sub>H<sub>14</sub>FN<sub>4</sub>S<sup>+</sup> 325.0918, found 325.0923 ([M + H]<sup>+</sup>).

**2-(1-(4-fluorophenethyl)-1*H*-1,2,3-triazol-4-yl)-6-methylbenzo[*d*]thiazole 75.** Following **General Procedure A<sub>1</sub>**, alkyne **43** (36 mg, 0.21 mmol), CuSO<sub>4</sub>·5H<sub>2</sub>O (5 mg, 0.02 mmol), sodium ascorbate (8 mg, 0.04 mmol), and azide **60** (69 mg, 0.42 mmol) were stirred in *t*-BuOH/H<sub>2</sub>O (1:1, 4.2 mL) to afford the 1,4-disubstituted-1,2,3-triazole **75** (49 mg, 69%) as a pale yellow solid after preparative TLC plate chromatography (CH<sub>2</sub>Cl<sub>2</sub>/MeOH – 95:5). TLC (CH<sub>2</sub>Cl<sub>2</sub>/MeOH – 95:5): R<sub>f</sub> = 0.79. Mp 178 °C. <sup>1</sup>H NMR (400 MHz, DMSO) δ 8.83 (s, 1H), 7.92 (br s, 1H), 7.89 (d, *J* = 9.0 Hz, 1H), 7.35 (dd, *J* = 9.0, 2.4 Hz, 1H), 7.28 – 7.24 (m, 2H), 7.13 – 7.08 (m, 2H), 4.73 (t, *J* = 7.2 Hz, 2H), 3.25 (t, *J* = 7.2 Hz, 2H), 2.45 (s, 3H). <sup>13</sup>C NMR (100 MHz, DMSO) δ 161.1 (d, <sup>1</sup>J<sub>CF</sub> = 240.7 Hz), 158.0, 151.3, 142.0, 135.3, 133.9, 133.5 (d, <sup>4</sup>J<sub>CF</sub> = 3.1 Hz), 130.6 (d, <sup>3</sup>J<sub>CF</sub> = 8.0 Hz), 128.0, 123.6, 122.1, 121.9, 115.2 (d, <sup>2</sup>J<sub>CF</sub> = 21.0 Hz), 50.9, 34.5, 21.0. IR (neat) ν<sub>max</sub> 3129 (w), 2950 (w), 1609 (m), 1578 (m), 1516 (m), 1487 (m), 1450 (m), 1431 (s), 1382 (m), 1357 (m), 1269 (m), 1236 (m), 1131 (m), 1055 (m), 1024 (m), 973 (m), 809 (s) cm<sup>-1</sup>. MS (ESI +ve) *m/z* 339 ([M + H]<sup>+</sup>, 100%). HRMS (ESI +ve TOF) calcd for C<sub>18</sub>H<sub>16</sub>FN<sub>4</sub>S<sup>+</sup> 339.1074, found 339.1080 ([M + H]<sup>+</sup>).

**6-methyl-2-(1-(4-(trifluoromethyl)benzyl)-1*H*-1,2,3-triazol-4-yl)benzo[*d*]thiazole 76.** Following **General Procedure A<sub>1</sub>**, alkyne **43** (36 mg, 0.21 mmol), CuSO<sub>4</sub>·5H<sub>2</sub>O (5 mg, 0.02 mmol), sodium ascorbate (8 mg, 0.04 mmol), and azide **56** (84 mg, 0.42 mmol) were stirred in *t*-BuOH/H<sub>2</sub>O (1:1, 4.2 mL) to afford the 1,4-disubstituted-1,2,3-triazole **76** (57 mg, 73%) as a



pale yellow solid after preparative TLC plate chromatography (CH<sub>2</sub>Cl<sub>2</sub>/MeOH – 95:5). TLC (CH<sub>2</sub>Cl<sub>2</sub>/MeOH – 95:5): R<sub>f</sub> = 0.87. Mp 175 °C. <sup>1</sup>H NMR (400 MHz, DMSO) δ 9.05 (s, 1H), 7.94 (br s, 1H), 7.91 (d, *J* = 9.0 Hz, 1H), 7.77 (d, *J* = 8.4 Hz, 2H), 7.60 (d, *J* = 8.4 Hz, 2H), 7.36 (dd, *J* = 8.4, 1.2 Hz), 5.85 (s, 2H), 2.45 (s, 3H). <sup>13</sup>C NMR (100 MHz, DMSO) δ 156.8, 151.33, 142.34, 140.2, 135.4, 134.0, 128.9 (q, <sup>2</sup>J<sub>CF</sub> = 31.8 Hz), 128.8, 128.1, 125.7 (q, <sup>3</sup>J<sub>CF</sub> = 3.8 Hz), 124.4 (q, <sup>1</sup>J<sub>CF</sub> = 270.4 Hz), 124.2, 122.2, 122.0, 52.7, 21.0. IR (neat) ν<sub>max</sub> 3138 (w), 2930 (w), 1609 (m), 1556 (m), 1507 (m), 1488 (m), 1454 (m), 1436 (s), 1323 (m), 1228 (s), 1174 (m), 1161 (m), 1119 (s), 1106 (m), 1066 (m), 949 (m), 808 (s) cm<sup>-1</sup>. MS (ESI +ve) *m/z* 375 ([M + H]<sup>+</sup>, 100%); (ESI -ve) *m/z* 373 ([M - H]<sup>-</sup>, 100%). HRMS (ESI +ve TOF) calcd for C<sub>18</sub>H<sub>14</sub>F<sub>3</sub>N<sub>4</sub>S<sup>+</sup> 375.0886, found 375.0891 ([M + H]<sup>+</sup>).

**4-(2-(4-(6-methylbenzo[*d*]thiazol-2-yl)-1*H*-1,2,3-triazol-1-yl)ethyl)phenol 77.** Following **General Procedure A<sub>2</sub>**, alkyne **43** (36 mg, 0.21 mmol), CuSO<sub>4</sub>·5H<sub>2</sub>O (5 mg, 0.02 mmol), sodium ascorbate (8 mg, 0.04 mmol), and azide **62** (69 mg, 0.42 mmol) were stirred in *t*-BuOH/H<sub>2</sub>O (1:1, 4.2 mL) to afford the 1,4-disubstituted-1,2,3-triazole **77** (57 mg, 81%) as a pale yellow solid after sequential trituration with CH<sub>2</sub>Cl<sub>2</sub>, MeCN, and hot MeOH. TLC (CH<sub>2</sub>Cl<sub>2</sub>/MeOH – 90:10): R<sub>f</sub> = 0.41. Mp 150 °C (decomp). <sup>1</sup>H NMR (400 MHz, DMSO) δ 9.24 (s, 1H), 8.78 (s, 1H), 7.93 (br s, 1H), 7.89 (d, *J* = 8.4 Hz, 1H), 7.36 (dd, *J* = 8.4, 2.0 Hz, 1H), 7.00 (d, *J* = 8.0 Hz, 2H), 6.65 (d, *J* = 8.0 Hz, 2H), 4.66 (t, *J* = 7.2 Hz, 2H), 3.13 (t, *J* = 7.2 Hz, 2H), 2.49 (s, 3H). <sup>13</sup>C NMR (400 MHz, DMSO) δ 158.0, 156.0, 151.3, 141.8, 135.3, 133.9, 129.6, 128.0, 127.3, 123.6, 122.1, 121.9, 115.2, 51.3, 34.7, 21.0. IR (neat) ν<sub>max</sub> 3128 (br), 2950 (w), 1609 (m), 1589 (m), 1516 (m), 1486 (m), 1449 (m), 1381 (w), 1357 (w), 1314 (s), 1296 (m), 1268 (m), 1237 (s), 1197 (m), 1175 (m), 1131 (m), 973 (m), 872 (s). MS (ESI +ve) *m/z* 337 ([M + H]<sup>+</sup>, 100%); (ESI -ve) *m/z* 335 ([M - H]<sup>-</sup>, 100%). HRMS (ESI +ve TOF) calcd for C<sub>18</sub>H<sub>17</sub>N<sub>4</sub>OS<sup>+</sup> 337.1118, found 337.1123 ([M + H]<sup>+</sup>).

**6-methyl-2-(1-(4-nitrobenzyl)-1*H*-1,2,3-triazol-4-yl)benzo[*d*]thiazole 78.** Following **General Procedure A<sub>2</sub>**, alkyne **43** (36 mg, 0.21 mmol), CuSO<sub>4</sub>·5H<sub>2</sub>O (5 mg, 0.02 mmol), sodium ascorbate (8 mg, 0.04 mmol), and azide **63** (75 mg, 0.42 mmol) were stirred in *t*-BuOH/H<sub>2</sub>O (1:1, 4.2 mL) to afford the 1,4-disubstituted-1,2,3-triazole **78** (55 mg, 75%) as a pale yellow solid after sequential trituration with CH<sub>2</sub>Cl<sub>2</sub>, MeCN, and hot MeOH. TLC (CH<sub>2</sub>Cl<sub>2</sub>/MeOH – 90:10): R<sub>f</sub> = 0.44. Mp 152 °C (decomp). <sup>1</sup>H NMR (500 MHz, DMSO) δ 9.06 (s, 1H), 8.25 (d, *J* = 9.0 Hz, 2H), 7.93 (br s, 1H), 7.90 (d, *J* = 8.5 Hz, 1H), 7.63 (d, *J* = 9.0 Hz, 2H), 7.36 (dd, *J* = 8.5, 2.0 Hz, 1H), 5.91 (s, 2H), 2.45 (s, 3H). <sup>13</sup>C NMR (500 MHz, DMSO) δ

157.7, 151.3, 147.4, 142.9, 142.4, 135.4, 134.0, 129.3, 128.1, 124.3, 124.0, 122.2, 122.0, 52.4, 21.1. IR (neat)  $\nu_{\max}$  3108 (w), 2900 (w), 2106 (w), 1607 (m), 1515 (s), 1484 (m), 1451 (m), 1345 (s), 1312 (m), 1269 (s), 1228 (s), 1174 (m), 1131 (m), 1039 (m), 1016 (m), 947 (m), 815 (s), 775 (s). MS (ESI +ve)  $m/z$  352 ( $[M + H]^+$ , 100%). HRMS (ESI +ve TOF) calcd for  $C_{17}H_{14}N_5O_2S^+$  352.0863, found 352.0868 ( $[M + H]^+$ ).

**2-azidoethan-1-ol 84.**<sup>6</sup> Following General Procedure B, alkyl bromide **79** (500 mg, 4.00 mmol) and  $NaN_3$  (390 mg, 6.00 mmol) were stirred in anhydrous DMF (20 mL) to afford the azide **84** (315 mg, 90%) as a pale yellow oil which was used for the next reaction without further purification. The spectroscopic data was in agreement with that previously reported. TLC ( $CH_2Cl_2/MeOH - 99:1$ ):  $R_f = 0.41$ .  $^1H$  NMR (400 MHz,  $CDCl_3$ )  $\delta$  3.77 (t,  $J = 5.2$  Hz, 2H), 3.44 (t,  $J = 5.2$  Hz, 2H) 2.14 (br s, 1H).  $^{13}C$  NMR (400 MHz,  $CDCl_3$ )  $\delta$  61.6, 53.7. MS (ESI +ve)  $m/z$  88 ( $[M + H]^+$ , 100%).

**3-azidopropan-1-ol 85.**<sup>7</sup> Following General Procedure B, alkyl bromide **80** (556 mg, 4.00 mmol) and  $NaN_3$  (390 mg, 6.00 mmol) were stirred in anhydrous DMF (20 mL) to afford the azide **85** (390 mg, 96%) as a pale yellow oil which was used for the next reaction without further purification. The spectroscopic data was in agreement with that previously reported. TLC ( $CH_2Cl_2/MeOH - 99:1$ ):  $R_f = 0.44$ .  $^1H$  NMR (400 MHz,  $CDCl_3$ )  $\delta$  3.70 (t,  $J = 6.0$  Hz, 2H), 3.41 (t,  $J = 6.0$  Hz, 2H) 2.42 (br s, 1H), 1.79 (quint,  $J = 6.0$  Hz, 2H).  $^{13}C$  NMR (400 MHz,  $CDCl_3$ )  $\delta$  59.7, 48.5, 31.5. MS (ESI +ve)  $m/z$  102 ( $[M + H]^+$ , 100%).

**7-azidoheptan-1-ol 86.**<sup>8</sup> Following General Procedure B, alkyl bromide **81** (780 mg, 4.00 mmol) and  $NaN_3$  (390 mg, 6.00 mmol) were stirred in anhydrous DMF (20 mL) to afford the azide **86** (588 mg, 94%) as a pale yellow oil which was used for the next reaction without further purification. The spectroscopic data was in agreement with that previously reported. TLC ( $CH_2Cl_2/MeOH - 95:5$ ):  $R_f = 0.40$ .  $^1H$  NMR (400 MHz,  $CDCl_3$ )  $\delta$  3.59 (t,  $J = 6.8$  Hz, 2H), 3.35 (t,  $J = 6.8$  Hz, 1H) 3.22 (t,  $J = 6.8$  Hz, 2H), 1.58 – 1.49 (m, 4H), 1.36 – 1.26 (m, 6H).  $^{13}C$  NMR (400 MHz,  $CDCl_3$ )  $\delta$  62.8, 51.5, 32.8, 29.0, 28.8, 26.7, 25.7. MS (ESI +ve)  $m/z$  158 ( $[M + H]^+$ , 100%).

**8-azidooctan-1-ol 87.**<sup>9</sup> Following General Procedure B, alkyl bromide **82** (836 mg, 4.00 mmol) and  $NaN_3$  (390 mg, 6.00 mmol) were stirred in anhydrous DMF (20 mL) to afford the azide **87** (622 mg, 91%) as a pale yellow oil which was used for the next reaction without

further purification. The spectroscopic data was in agreement with that previously reported. TLC (CH<sub>2</sub>Cl<sub>2</sub>/MeOH – 95:5): R<sub>f</sub> = 0.38. <sup>1</sup>H NMR (400 MHz, CDCl<sub>3</sub>) δ 3.60 (t, *J* = 6.4 Hz, 2H), 3.23 (t, *J* = 6.8 Hz, 2H), 1.75 (br s, 1H), 1.61 – 1.50 (m, 4H), 1.36 – 1.30 (m, 8H). <sup>13</sup>C NMR (400 MHz, CDCl<sub>3</sub>) δ 63.0, 51.5, 32.8, 29.3, 29.2, 28.9, 26.7, 25.7. MS (ESI +ve) *m/z* 172 ([M + H]<sup>+</sup>, 100%).

**2-(2-azidoethoxy)ethan-1-ol 88.**<sup>10</sup> Following General Procedure B, alkyl bromide **83** (676 mg, 4.00 mmol) and NaN<sub>3</sub> (390 mg, 6.00 mmol) were stirred in anhydrous DMF (20 mL) to afford the azide **88** (499 mg, 95%) as a pale yellow oil which was used for the next reaction without further purification. The spectroscopic data was in agreement with that previously reported. TLC (CH<sub>2</sub>Cl<sub>2</sub>/MeOH – 95:5): R<sub>f</sub> = 0.41. <sup>1</sup>H NMR (400 MHz, CDCl<sub>3</sub>) δ 3.78 – 3.74 (m, 2H), 3.71 – 3.69 (m, 2H), 3.63 – 3.61 (m, 2H), 3.43 – 3.41 (m, 2H), 2.38 (t, *J* = 6.0 Hz, 1H). <sup>13</sup>C NMR (400 MHz, CDCl<sub>3</sub>) δ 72.5, 70.1, 61.8, 50.8. MS (ESI +ve) *m/z* 132 ([M + H]<sup>+</sup>, 100%).

**2-(4-(6-methoxybenzo[*d*]thiazol-2-yl)-1*H*-1,2,3-triazol-1-yl)ethan-1-ol 89.** Following General Procedure A<sub>1</sub>, alkyne **25** (40 mg, 0.21 mmol), CuSO<sub>4</sub>·5H<sub>2</sub>O (5 mg, 0.02 mmol), sodium ascorbate (8 mg, 0.04 mmol), and azide **84** (37 mg, 0.42 mmol) were stirred in *t*-BuOH/H<sub>2</sub>O (1:1, 4.2 mL) to afford the 1,4-disubstituted-1,2,3-triazole **89** (49 mg, 84%) as a pale yellow solid after preparative TLC plate chromatography (CH<sub>2</sub>Cl<sub>2</sub>/MeOH – 95:5). TLC (CH<sub>2</sub>Cl<sub>2</sub>/MeOH – 95:5): R<sub>f</sub> = 0.74. Mp 178 °C (decomp). <sup>1</sup>H NMR (400 MHz, DMSO) δ 8.78 (s, 1H), 7.91 (d, *J* = 8.8 Hz, 1H), 7.73 (d, *J* = 2.4 Hz, 1H), 7.14 (dd, *J* = 8.8, 2.4 Hz, 1H), 5.09 (t, *J* = 5.2 Hz, 1H), 4.52 (t, *J* = 5.6 Hz, 2H), 3.86 (s, 3H), 3.85 (dt, *J* = 5.6, 5.2 Hz, 2H). <sup>13</sup>C NMR (400 MHz, CDCl<sub>3</sub>) δ 157.5, 156.6, 147.6, 141.8, 135.3, 123.7, 123.1, 115.9, 105.0, 59.6, 55.7, 52.7. IR (neat) ν<sub>max</sub> 3216 (br), 2922 (w), 2853 (w), 1608 (m), 1560 (w), 1434 (m), 1420 (m), 1258 (s), 1229 (s), 1081 (s), 1069 (m), 959 (m), 834 (s), 715 (w), 676 (m) cm<sup>-1</sup>. MS (ESI +ve) *m/z* 277 ([M + H]<sup>+</sup>, 100%). HRMS (ESI +ve TOF) calcd for C<sub>12</sub>H<sub>13</sub>N<sub>4</sub>O<sub>2</sub>S<sup>+</sup> 277.0754, found 277.0754 ([M + H]<sup>+</sup>).

**3-(4-(6-methoxybenzo[*d*]thiazol-2-yl)-1*H*-1,2,3-triazol-1-yl)propan-1-ol 90.**<sup>11</sup> Following General Procedure A<sub>1</sub>, alkyne **25** (40 mg, 0.21 mmol), CuSO<sub>4</sub>·5H<sub>2</sub>O (5 mg, 0.02 mmol), sodium ascorbate (8 mg, 0.04 mmol), and azide **85** (43 mg, 0.42 mmol) were stirred in *t*-BuOH/H<sub>2</sub>O (1:1, 4.2 mL) to afford the 1,4-disubstituted-1,2,3-triazole **90** (50 mg, 82%) as a pale yellow solid after preparative TLC plate chromatography (CH<sub>2</sub>Cl<sub>2</sub>/MeOH – 95:5). The spectroscopic data was in agreement with that previously reported. TLC (CH<sub>2</sub>Cl<sub>2</sub>/MeOH –

95:5):  $R_f$  = 0.77. Mp 131 °C.  $^1\text{H}$  NMR (400 MHz, DMSO)  $\delta$  8.85 (s, 1H), 7.91 (d,  $J$  = 8.8 Hz, 1H), 7.73 (d,  $J$  = 2.4 Hz, 1H), 7.15 (dd,  $J$  = 8.8, 2.4 Hz, 1H), 4.71 (t,  $J$  = 5.2 Hz, 1H), 4.53 (t,  $J$  = 6.8 Hz, 2H), 3.85 (s, 3H), 3.44 (dt,  $J$  = 6.8, 5.2 Hz, 2H), 2.05 (quint,  $J$  = 6.8 Hz, 2H).  $^{13}\text{C}$  NMR (400 MHz, DMSO)  $\delta$  157.5, 156.6, 147.6, 142.0, 135.4, 123.4, 123.1, 115.9, 105.0, 57.6, 55.7, 47.3, 32.7. IR (neat)  $\nu_{\text{max}}$  3306 (br), 2926 (w), 2834 (w), 1604 (m), 1556 (w), 1434 (m), 1411 (m), 1266 (s), 1223 (s), 1066 (s), 1040 (s), 950 (s), 838 (s), 711 (w), 679 (m)  $\text{cm}^{-1}$ . MS (ESI +ve)  $m/z$  291 ( $[\text{M} + \text{H}]^+$ , 100%). HRMS (ESI +ve TOF) calcd for  $\text{C}_{13}\text{H}_{15}\text{N}_4\text{O}_2\text{S}^+$  291.0910, found 291.0910 ( $[\text{M} + \text{H}]^+$ ).

**7-(4-(6-methoxybenzo[*d*]thiazol-2-yl)-1*H*-1,2,3-triazol-1-yl)heptan-1-ol 91.** Following **General Procedure A<sub>1</sub>**, alkyne **25** (40 mg, 0.21 mmol),  $\text{CuSO}_4 \cdot 5\text{H}_2\text{O}$  (5 mg, 0.02 mmol), sodium ascorbate (8 mg, 0.04 mmol), and azide **86** (66 mg, 0.42 mmol) were stirred in *t*-BuOH/ $\text{H}_2\text{O}$  (1:1, 4.2 mL) to afford the 1,4-disubstituted-1,2,3-triazole **91** (55 mg, 76%) as a pale yellow solid after preparative TLC plate chromatography ( $\text{CH}_2\text{Cl}_2/\text{MeOH}$  – 90:10). TLC ( $\text{CH}_2\text{Cl}_2/\text{MeOH}$  – 90:10):  $R_f$  = 0.67. Mp 108 °C.  $^1\text{H}$  NMR (400 MHz, DMSO)  $\delta$  8.87 (s, 1H), 7.90 (d,  $J$  = 8.8 Hz, 1H), 7.73 (d,  $J$  = 2.4 Hz, 1H), 7.13 (dd,  $J$  = 8.8, 2.4 Hz, 1H), 4.46 (t,  $J$  = 6.8 Hz, 2H), 4.32 (t,  $J$  = 5.2 Hz, 1H), 3.85 (s, 3H), 3.35 (dt,  $J$  = 6.8, 5.2 Hz, 2H), 1.89 (quint,  $J$  = 6.8 Hz, 2H), 1.42 – 1.25 (m, 8H).  $^{13}\text{C}$  NMR (400 MHz, DMSO)  $\delta$  157.5, 156.6, 147.6, 142.0, 135.4, 123.2, 123.1, 115.9, 104.9, 60.6, 55.7, 49.9, 32.5, 29.5, 28.3, 25.8, 25.3. IR (neat)  $\nu_{\text{max}}$  3423 (br), 3128 (w), 2930 (m), 2854 (m), 1609 (m), 1554 (w), 1493 (s), 1436 (s), 1268 (s), 1216 (s), 1070 (s), 1057 (m), 944 (s), 833 (s), 704 (w), 666 (m)  $\text{cm}^{-1}$ . MS (ESI +ve)  $m/z$  347 ( $[\text{M} + \text{H}]^+$ , 100%). HRMS (ESI +ve TOF) calcd for  $\text{C}_{17}\text{H}_{23}\text{N}_4\text{O}_2\text{S}^+$  347.1536, found 347.1542 ( $[\text{M} + \text{H}]^+$ ).

**8-(4-(6-methoxybenzo[*d*]thiazol-2-yl)-1*H*-1,2,3-triazol-1-yl)octan-1-ol 92.** Following **General Procedure A<sub>1</sub>**, alkyne **25** (40 mg, 0.21 mmol),  $\text{CuSO}_4 \cdot 5\text{H}_2\text{O}$  (5 mg, 0.02 mmol), sodium ascorbate (8 mg, 0.04 mmol), and azide **87** (72 mg, 0.42 mmol) were stirred in *t*-BuOH/ $\text{H}_2\text{O}$  (1:1, 4.2 mL) to afford the 1,4-disubstituted-1,2,3-triazole **92** (56 mg, 74%) as a pale yellow solid after preparative TLC plate chromatography ( $\text{CH}_2\text{Cl}_2/\text{MeOH}$  – 90:10). TLC ( $\text{CH}_2\text{Cl}_2/\text{MeOH}$  – 90:10):  $R_f$  = 0.66. Mp 106 °C.  $^1\text{H}$  NMR (400 MHz, DMSO)  $\delta$  8.87 (s, 1H), 7.90 (d,  $J$  = 8.8 Hz, 1H), 7.73 (d,  $J$  = 2.4 Hz, 1H), 7.14 (dd,  $J$  = 8.8, 2.4 Hz, 1H), 4.46 (t,  $J$  = 6.8 Hz, 2H), 4.30 (t,  $J$  = 5.2 Hz, 1H), 3.85 (s, 3H), 3.36 (dt,  $J$  = 6.8, 5.2 Hz, 2H), 1.93 – 1.86 (m, 2H), 1.41 – 1.23 (m, 10H).  $^{13}\text{C}$  NMR (400 MHz, DMSO)  $\delta$  157.5, 156.6, 147.6, 142.0, 135.3, 123.2, 123.1, 115.9, 104.9, 60.7, 55.7, 49.9, 32.5, 29.5, 28.7, 28.4, 25.7, 25.4. IR (neat)

$\nu_{\max}$  3425 (br), 3127 (w), 2929 (m), 2852 (m), 1609 (m), 1554 (w), 1493 (s), 1435 (s), 1269 (s), 1215 (s), 1070 (s), 1056 (m), 945 (s), 836 (s), 704 (w), 667 (m)  $\text{cm}^{-1}$ . MS (ESI +ve)  $m/z$  361 ( $[\text{M} + \text{H}]^+$ , 100%). HRMS (ESI +ve TOF) calcd for  $\text{C}_{18}\text{H}_{25}\text{N}_4\text{O}_2\text{S}^+$  361.1693, found 361.1693 ( $[\text{M} + \text{H}]^+$ ).

**2-(2-(4-(6-methoxybenzo[*d*]thiazol-2-yl)-1*H*-1,2,3-triazol-1-yl)ethoxy)ethan-1-ol 93.**

**Following General Procedure A<sub>1</sub>**, alkyne **25** (40 mg, 0.21 mmol),  $\text{CuSO}_4 \cdot 5\text{H}_2\text{O}$  (5 mg, 0.02 mmol), sodium ascorbate (8 mg, 0.04 mmol), and azide **88** (55 mg, 0.42 mmol) were stirred in *t*-BuOH/ $\text{H}_2\text{O}$  (1:1, 4.2 mL) to afford the 1,4-disubstituted-1,2,3-triazole **93** (49 mg, 73%) as a pale yellow solid after preparative TLC plate chromatography ( $\text{CH}_2\text{Cl}_2/\text{MeOH} - 90:10$ ). TLC ( $\text{CH}_2\text{Cl}_2/\text{MeOH} - 90:10$ ):  $R_f = 0.54$ . Mp 106 °C.  $^1\text{H}$  NMR (400 MHz,  $\text{CDCl}_3$ )  $\delta$  8.38 (s, 1H), 7.89 (d,  $J = 8.8$  Hz, 1H), 7.39 (d,  $J = 2.4$  Hz, 1H), 7.09 (dd,  $J = 8.8, 2.4$  Hz, 1H), 4.66 (t,  $J = 5.2$  Hz, 2H), 3.95 (t,  $J = 5.2$  Hz, 2H), 3.89 (s, 3H), 3.76 (t,  $J = 5.2$  Hz, 2H), 3.61 (t,  $J = 5.2$  Hz, 2H), 2.34 (br s, 1H).  $^{13}\text{C}$  NMR (400 MHz,  $\text{CDCl}_3$ )  $\delta$  158.1, 157.2, 148.2, 143.5, 136.2, 123.5, 122.9, 116.1, 104.3, 72.9, 69.3, 61.8, 56.0, 50.8. IR (neat)  $\nu_{\max}$  3258 (br), 3153 (w), 2958 (m), 2836 (m), 1608 (m), 1560 (s), 1490 (s), 1431 (s), 1260 (s), 1223 (s), 1062 (s), 1040 (m), 940 (s), 827 (s), 700 (w), 656 (m)  $\text{cm}^{-1}$ . MS (ESI +ve)  $m/z$  321 ( $[\text{M} + \text{H}]^+$ , 100%). HRMS (ESI +ve TOF) calcd for  $\text{C}_{14}\text{H}_{17}\text{N}_4\text{O}_3\text{S}^+$  321.1016, found 321.1021 ( $[\text{M} + \text{H}]^+$ ).

**6-methoxybenzo[*d*]thiazole-2-carboxylic acid 95.**<sup>12</sup> To a solution of benzothiazole nitrile **94** (1.00 g, 5.26 mmol) in EtOH (30 mL) was added a solution of 1.0 N NaOH (6.0 mL, 6.00 mmol). The reaction was stirred at reflux for 18 h. The EtOH was removed under reduced pressure at 40 °C, and the minimum volume of  $\text{H}_2\text{O}$  was added to the residue to dissolve completely any solid material. A solution of 18% HCl (1.6 mL) was added until pH reached 3, yielding a yellow precipitate. The resulting precipitate was collected by filtration, washed with  $\text{H}_2\text{O}$  (30 mL), and dried *in vacuo* to afford the benzothiazole carboxylic acid **95** (1.01 g, 92%) as a pale yellow solid. The spectroscopic data was in agreement with that previously reported. TLC ( $\text{CH}_2\text{Cl}_2/\text{MeOH} - 90:10$ ):  $R_f = 0.53$ .  $^1\text{H}$  NMR (400 MHz, DMSO)  $\delta$  8.06 (d,  $J = 9.2$  Hz, 1H), 7.74 (d,  $J = 2.0$  Hz, 1H), 7.22 (dd,  $J = 9.2, 2.0$  Hz, 1H), 3.86 (s, 3H).  $^{13}\text{C}$  NMR (400 MHz, DMSO)  $\delta$  161.6, 159.0, 158.0, 147.5, 138.3, 125.4, 117.4, 104.5, 55.9. MS (ESI +ve)  $m/z$  208 ( $[\text{M} - \text{H}]^-$ , 100%).

**6-methoxy-*N*-(6-methylpyridin-3-yl)benzo[*d*]thiazole-2-carboxamide 109.** **Following General Procedure C**, benzothiazole carboxylic acid **95** (100 mg, 0.48 mmol), amine **96** (52

mg, 0.48 mmol), HOBT (72 mg, 0.48 mmol), EDCI (119 mg, 0.62 mmol), and DIPEA (334  $\mu$ L, 1.92 mmol) were stirred in anhydrous DMF (4.8 mL) for 24 h to afford the amide **109** (101 mg, 70%) as a pale yellow solid after preparative TLC plate chromatography ( $\text{CH}_2\text{Cl}_2/\text{MeOH}$  – 97:3). TLC ( $\text{CH}_2\text{Cl}_2/\text{MeOH}$  – 97:3):  $R_f$  = 0.63. Mp 114 °C.  $^1\text{H}$  NMR (400 MHz, DMSO)  $\delta$  11.17 (br s, 1H), 8.93 (br s, 1H), 8.15 (dd,  $J$  = 8.4, 2.4 Hz, 1H), 8.05 (d,  $J$  = 9.2 Hz, 1H), 7.82 (d,  $J$  = 2.0 Hz, 1H), 7.29 – 7.23 (m, 2H), 3.88 (s, 3H), 2.45 (s, 3H).  $^{13}\text{C}$  NMR (400 MHz, DMSO)  $\delta$  161.2, 158.8, 158.5, 153.4, 147.0, 141.5, 138.3, 132.3, 128.4, 124.8, 122.8, 117.4, 102.8, 55.9, 23.4. IR (neat)  $\nu_{\text{max}}$  3200 (w), 3088 (w), 1652 (m), 1605 (s), 1555 (s), 1492 (s), 1450 (m), 1430 (m), 1330 (m), 1293 (s), 1263 (s), 1226 (m), 1182 (m), 1045 (m), 1026 (m), 876 (m), 835 (m), 741 (m)  $\text{cm}^{-1}$ . MS (ESI +ve)  $m/z$  300 ( $[\text{M} + \text{H}]^+$ , 100%). HRMS (ESI +ve TOF) calcd for  $\text{C}_{15}\text{H}_{14}\text{N}_3\text{O}_2\text{S}^+$  300.0801, found 300.0807 ( $[\text{M} + \text{H}]^+$ ).

**6-methoxy-*N*-(pyridin-4-yl)benzo[*d*]thiazole-2-carboxamide 110.** Following General Procedure C, benzothiazole carboxylic acid **95** (100 mg, 0.48 mmol), amine **97** (45 mg, 0.48 mmol), HOBT (72 mg, 0.48 mmol), EDCI (119 mg, 0.62 mmol), and DIPEA (334  $\mu$ L, 1.92 mmol) were stirred in anhydrous DMF (4.8 mL) for 24 h to afford the amide **110** (105 mg, 77%) as a pale yellow solid after preparative TLC plate chromatography ( $\text{CH}_2\text{Cl}_2/\text{MeOH}$  – 90:10). TLC ( $\text{CH}_2\text{Cl}_2/\text{MeOH}$  – 90:10):  $R_f$  = 0.46. Mp 220 °C (decomp).  $^1\text{H}$  NMR (500 MHz, DMSO)  $\delta$  11.41 (s, 1H), 8.52 (d,  $J$  = 6.5 Hz, 2H), 8.11 (d,  $J$  = 9.0 Hz, 1H), 7.93 (d,  $J$  = 6.5 Hz, 2H), 7.84 (d,  $J$  = 2.5 Hz, 1H), 7.27 (dd,  $J$  = 9.0, 2.5 Hz, 1H), 3.89 (s, 3H).  $^{13}\text{C}$  NMR (500 MHz, DMSO)  $\delta$  160.8, 159.3, 158.9, 150.4, 147.0, 145.0, 138.5, 125.0, 117.7, 114.5, 104.8, 55.9. IR (neat)  $\nu_{\text{max}}$  2944 (w), 2840 (w), 2224 (w), 1741 (m), 1682 (m), 1596 (m), 1551 (m), 1495 (s), 1432 (m), 1326 (m), 1275 (m), 1226 (s), 1209 (s), 1187 (m), 1044 (m), 1024 (m), 907 (m), 830 (m), 810 (s)  $\text{cm}^{-1}$ . MS (ESI +ve)  $m/z$  286 ( $[\text{M} + \text{H}]^+$ , 100%). HRMS (ESI +ve TOF) calcd for  $\text{C}_{14}\text{H}_{12}\text{N}_3\text{O}_2\text{S}^+$  286.0645, found 286.0645 ( $[\text{M} + \text{H}]^+$ ).

**(3-cyanophenyl)-6-methoxybenzo[*d*]thiazole-2-carboxamide 111.** Following General Procedure C, benzothiazole carboxylic acid **95** (100 mg, 0.48 mmol), amine **98** (57 mg, 0.48 mmol), HOBT (72 mg, 0.48 mmol), EDCI (119 mg, 0.62 mmol), and DIPEA (334  $\mu$ L, 1.92 mmol) were stirred in anhydrous DMF (4.8 mL) for 24 h to afford the amide **111** (111 mg, 75%) as a pale yellow solid after preparative TLC plate chromatography ( $\text{CH}_2\text{Cl}_2/\text{MeOH}$  – 90:10). TLC ( $\text{CH}_2\text{Cl}_2/\text{MeOH}$  – 90:10):  $R_f$  = 0.39. Mp 168 °C.  $^1\text{H}$  NMR (500 MHz,  $\text{CDCl}_3$ )  $\delta$  9.30 (s, 1H), 8.16 (s, 1H), 7.98 (d,  $J$  = 9.0 Hz, 1H), 7.95 – 7.93 (m, 1H), 7.50 – 7.46 (m, 2H), 7.40 (d,  $J$  = 2.0 Hz, 1H), 7.19 (dd,  $J$  = 9.0, 2.5 Hz, 1H), 3.92 (s, 3H).  $^{13}\text{C}$  NMR (500 MHz,

CDCl<sub>3</sub>)  $\delta$  160.2, 159.6, 158.2, 147.2, 139.2, 138.1, 130.3, 128.3, 125.3, 123.9, 122.9, 118.4, 118.0, 113.5, 104.1, 56.0. IR (neat)  $\nu_{\max}$  3329 (m), 2956 (w), 2224 (m), 1784 (w), 1675 (m), 1589 (m), 1533 (s), 1499 (s), 1426 (s), 1326 (m), 1259 (m), 1237 (m), 1218 (s), 1188 (m), 1044 (m), 1023 (m), 886 (m), 849 (s), 789 (s), 674 (s) cm<sup>-1</sup>. MS (ESI -ve)  $m/z$  308 ([M - H]<sup>-</sup>, 100%). HRMS (ESI -ve TOF) calcd for C<sub>16</sub>H<sub>10</sub>N<sub>3</sub>O<sub>2</sub>S<sup>-</sup> 308.0499, found 308.0488 ([M - H]<sup>-</sup>).

***N*-(5-fluoropyridin-3-yl)-6-methoxybenzo[*d*]thiazole-2-carboxamide 112.** Following General Procedure C, benzothiazole carboxylic acid **95** (100 mg, 0.48 mmol), amine **99** (54 mg, 0.48 mmol), HOBT (72 mg, 0.48 mmol), EDCI (119 mg, 0.62 mmol), and DIPEA (334  $\mu$ L, 1.92 mmol) were stirred in anhydrous DMF (4.8 mL) for 24 h to afford the amide **112** (106 mg, 73%) as a pale yellow solid after preparative TLC plate chromatography (CH<sub>2</sub>Cl<sub>2</sub>/MeOH - 95:5). TLC (CH<sub>2</sub>Cl<sub>2</sub>/MeOH - 95:5):  $R_f$  = 0.60. Mp 204 °C. <sup>1</sup>H NMR (500 MHz, DMSO)  $\delta$  11.37 (br s, 1H), 8.72 (s, 1H), 8.46 - 8.41 (m, 1H), 8.09 (d,  $J$  = 9.2 Hz, 1H), 7.83 (d,  $J$  = 2.0 Hz, 1H), 7.27 - 7.22 (m, 2H), 3.88 (s, 3H). <sup>13</sup>C NMR (125 MHz, DMSO)  $\delta$  160.9, 159.2 (d, <sup>1</sup> $J_{CF}$  = 232.5 Hz), 158.8, 158.7, 147.0, 139.5 (d, <sup>2</sup> $J_{CF}$  = 15.6 Hz), 138.4, 134.3, 133.2, 124.9, 117.6, 109.4 (d, <sup>2</sup> $J_{CF}$  = 39.1 Hz), 104.8, 55.9. IR (neat)  $\nu_{\max}$  3254 (br), 3066 (w), 1686 (m), 1590 (m), 1540 (s), 1499 (s), 1448 (m), 1426 (m), 1333 (m), 1312 (s), 1296 (s), 1247 (s), 1228 (m), 1124 (m), 1048 (m), 1018 (m), 871 (m), 727 (s) cm<sup>-1</sup>. MS (ESI +ve)  $m/z$  304 ([M + H]<sup>+</sup>, 100%). HRMS (ESI +ve TOF) calcd for C<sub>14</sub>H<sub>11</sub>FN<sub>3</sub>O<sub>2</sub>S<sup>+</sup> 304.0551, found 304.0556 ([M + H]<sup>+</sup>).

***N*-(4-fluoropyridin-2-yl)-6-methoxybenzo[*d*]thiazole-2-carboxamide 113.** Following General Procedure C, benzothiazole carboxylic acid **95** (100 mg, 0.48 mmol), amine **100** (54 mg, 0.48 mmol), HOBT (72 mg, 0.48 mmol), EDCI (119 mg, 0.62 mmol), and DIPEA (334  $\mu$ L, 1.92 mmol) were stirred in anhydrous DMF (4.8 mL) for 24 h to afford the amide **113** (110 mg, 76%) as a pale yellow solid after preparative TLC plate chromatography (CH<sub>2</sub>Cl<sub>2</sub>/MeOH - 95:5). TLC (CH<sub>2</sub>Cl<sub>2</sub>/MeOH - 95:5):  $R_f$  = 0.61. Mp 202 °C. <sup>1</sup>H NMR (500 MHz, DMSO)  $\delta$  10.61 (br s, 1H), 8.49 - 8.47 (m, 1H), 8.12 (d,  $J$  = 9.2 Hz, 1H), 7.97 - 7.94 (m, 1H), 7.87 (d,  $J$  = 2.0 Hz, 1H), 7.28 (dd,  $J$  = 9.2, 2.0 Hz, 1H), 7.22 - 7.18 (m, 1H), 3.89 (s, 3H). <sup>13</sup>C NMR (125 MHz, DMSO)  $\delta$  169.0 (d, <sup>1</sup> $J_{CF}$  = 255.8 Hz), 159.9, 159.0, 158.6, 152.7, 151.3, 146.8, 138.7, 125.2, 117.8, 108.7 (d, <sup>2</sup> $J_{CF}$  = 17.4 Hz), 104.9, 101.7 (d, <sup>2</sup> $J_{CF}$  = 23.4 Hz), 55.9. IR (neat)  $\nu_{\max}$  3179 (br), 3071 (w), 1668 (m), 1595 (m), 1555 (s), 1507 (s), 1466 (m), 1427 (m), 1416 (m), 1329 (s), 1297 (s), 1258 (s), 1220 (m), 1130 (m), 1043 (m), 1016 (m), 857 (m), 767 (s) cm<sup>-1</sup>.

MS (ESI +ve)  $m/z$  304 ( $[M + H]^+$ , 100%). HRMS (ESI +ve TOF) calcd for  $C_{14}H_{11}FN_3O_2S^+$  304.0551, found 304.0556 ( $[M + H]^+$ ).

***N*-(6-fluoropyridin-3-yl)-6-methoxybenzo[*d*]thiazole-2-carboxamide 114.** Following General Procedure C, benzothiazole carboxylic acid **95** (100 mg, 0.48 mmol), amine **101** (54 mg, 0.48 mmol), HOBT (72 mg, 0.48 mmol), EDCI (119 mg, 0.62 mmol), and DIPEA (334  $\mu$ L, 1.92 mmol) were stirred in anhydrous DMF (4.8 mL) for 24 h to afford the amide **114** (112 mg, 77%) as a brown solid after preparative TLC plate chromatography ( $CH_2Cl_2/MeOH - 95:5$ ). TLC ( $CH_2Cl_2/MeOH - 95:5$ ):  $R_f = 0.66$ . Mp 202 °C.  $^1H$  NMR (500 MHz, DMSO)  $\delta$  11.50 (br s, 1H), 8.98 (s, 1H), 8.35 – 8.31 (m, 1H), 8.26 – 8.22 (m, 1H), 8.09 (d,  $J = 9.2$  Hz, 1H), 7.82 (d,  $J = 2.0$  Hz, 1H), 7.25 (dd,  $J = 9.2, 2.0$  Hz), 3.88 (s, 3H).  $^{13}C$  NMR (125 MHz, DMSO)  $\delta$  160.7, 158.5 (d,  $^1J_{CF} = 252.0$  Hz), 159.0, 158.9, 147.0, 138.5, 138.4, 136.1, 132.8 (d,  $^2J_{CF} = 30.0$  Hz), 125.0, 117.6, 114.4 (d,  $^3J_{CF} = 22.5$  Hz), 104.8, 55.9. IR (neat)  $\nu_{max}$  3234 (br), 3052 (w), 1656 (m), 1603 (m), 1532 (s), 1499 (s), 1449 (m), 1429 (m), 1381 (m), 1331 (m), 1298 (s), 1271 (s), 1220 (m), 1121 (m), 1045 (m), 1022 (m), 870 (m), 733 (s)  $cm^{-1}$ . MS (ESI +ve)  $m/z$  304 ( $[M + H]^+$ , 100%). HRMS (ESI +ve TOF) calcd for  $C_{14}H_{11}FN_3O_2S^+$  304.0551, found 304.0556 ( $[M + H]^+$ ).

***N*-(4-(hydroxymethyl)phenyl)-6-methoxybenzo[*d*]thiazole-2-carboxamide 115.** Following General Procedure C, benzothiazole carboxylic acid **95** (100 mg, 0.48 mmol), amine **102** (59 mg, 0.48 mmol), HOBT (72 mg, 0.48 mmol), EDCI (119 mg, 0.62 mmol), and DIPEA (334  $\mu$ L, 1.92 mmol) were stirred in anhydrous DMF (4.8 mL) for 24 h to afford the amide **115** (112 mg, 71%) as a pale yellow solid after preparative TLC plate chromatography ( $CH_2Cl_2/MeOH - 90:10$ ). TLC ( $CH_2Cl_2/MeOH - 90:10$ ):  $R_f = 0.35$ . Mp 158 °C (decomp).  $^1H$  NMR (400 MHz,  $CDCl_3$ )  $\delta$  10.93 (s, 1H), 8.08 (d,  $J = 9.2$  Hz, 1H), 7.84 (d,  $J = 8.4$  Hz, 2H), 7.81 (d,  $J = 2.4$  Hz, 1H), 7.32 (d,  $J = 8.4$  Hz, 2H), 7.25 (dd,  $J = 9.2, 2.4$  Hz, 1H), 5.14 (t,  $J = 5.6$  Hz, 1H), 4.48 (d,  $J = 5.6$  Hz, 2H), 3.88 (s, 3H).  $^{13}C$  NMR (400 MHz,  $CDCl_3$ )  $\delta$  161.9, 158.6, 158.1, 147.1, 138.6, 138.3, 136.5, 126.8, 124.8, 120.4, 117.3, 104.8, 62.6, 55.8. IR (neat)  $\nu_{max}$  3452 (br), 3258 (br), 1645 (m), 1596 (m), 1529 (s), 1494 (s), 1412 (m), 1332 (m), 1269 (m), 1223 (s), 1186 (m), 1048 (m), 1018 (m), 977 (m), 910 (m), 876 (m), 824 (s), 733 (m)  $cm^{-1}$ . MS (ESI +ve)  $m/z$  315 ( $[M + H]^+$ , 100%). HRMS (ESI +ve TOF) calcd for  $C_{16}H_{15}N_2O_3S^+$  315.0798, found 315.0798 ( $[M + H]^+$ ).

**6-methoxy-*N*-((6-methylpyridin-3-yl)methyl)benzo[*d*]thiazole-2-carboxamide 116.** Following General Procedure C, benzothiazole carboxylic acid **95** (100 mg, 0.48 mmol),



amine **103** (59 mg, 0.48 mmol), HOBT (72 mg, 0.48 mmol), EDCI (119 mg, 0.62 mmol), and DIPEA (334  $\mu$ L, 1.92 mmol) were stirred in anhydrous DMF (4.8 mL) for 24 h to afford the amide **116** (123 mg, 82%) as a pale yellow solid after preparative TLC plate chromatography ( $\text{CH}_2\text{Cl}_2/\text{MeOH} - 95:5$ ). TLC ( $\text{CH}_2\text{Cl}_2/\text{MeOH} - 95:5$ ):  $R_f = 0.71$ . Mp 201  $^\circ\text{C}$ .  $^1\text{H}$  NMR (400 MHz,  $\text{CDCl}_3$ )  $\delta$  8.44 (br s, 1H), 8.32 (br s, 1H), 7.96 (dd,  $J = 8.4, 2.4$  Hz, 1H), 7.49 (d,  $J = 9.2$  Hz, 1H), 7.37 (d,  $J = 2.0$  Hz, 1H), 7.26 (d,  $J = 8.4$  Hz, 1H), 7.14 (dd,  $J = 9.2, 2.0$  Hz, 1H), 4.76 (d,  $J = 6.0$  Hz, 2H) 3.90 (s, 3H), 2.34 (s, 3H).  $^{13}\text{C}$  NMR (400 MHz,  $\text{CDCl}_3$ )  $\delta$  161.1, 160.3, 159.0, 153.4, 149.9, 147.7, 139.0, 137.6, 132.2, 125.2, 121.7, 117.2, 104.0, 56.0, 44.7, 18.3. IR (neat)  $\nu_{\text{max}}$  3366 (m), 3300 (w), 1657 (s), 1604 (m), 1516 (s), 1497 (s), 1448 (m), 1428 (m), 1326 (s), 1263 (s), 1226 (m), 1226 (m), 1183 (m), 1058 (s), 1023 (m), 872 (m), 822 (s), 764 (m)  $\text{cm}^{-1}$ . MS (ESI +ve)  $m/z$  314 ( $[\text{M} + \text{H}]^+$ , 100%). HRMS (ESI +ve TOF) calcd for  $\text{C}_{16}\text{H}_{16}\text{N}_3\text{O}_2\text{S}^+$  314.0958, found 314.0963 ( $[\text{M} + \text{H}]^+$ ).

***N*-benzyl-6-methoxybenzo[*d*]thiazole-2-carboxamide 117.** Following General Procedure C, benzothiazole carboxylic acid **95** (100 mg, 0.48 mmol), amine **104** (51 mg, 0.48 mmol), HOBT (72 mg, 0.48 mmol), EDCI (119 mg, 0.62 mmol), and DIPEA (334  $\mu$ L, 1.92 mmol) were stirred in anhydrous DMF (4.8 mL) for 24 h to afford the amide **117** (122 mg, 85%) as a white solid after preparative TLC plate chromatography ( $\text{CH}_2\text{Cl}_2/\text{MeOH} - 98:2$ ). TLC ( $\text{CH}_2\text{Cl}_2/\text{MeOH} - 98:2$ ):  $R_f = 0.76$ . Mp 155 $^\circ\text{C}$ .  $^1\text{H}$  NMR (400 MHz,  $\text{CDCl}_3$ )  $\delta$  7.89 (d,  $J = 9.2$  Hz, 1H), 7.67 (br s, 1H), 7.40 – 7.30 (m, 5H), 7.13 (dd,  $J = 9.2, 2.0$  Hz, 1H), 4.68 (d,  $J = 6.0$  Hz, 2H) 3.90 (s, 3H).  $^{13}\text{C}$  NMR (400 MHz,  $\text{CDCl}_3$ )  $\delta$  161.1, 160.1, 159.1, 147.5, 139.0, 137.6, 129.0, 128.2, 127.9, 125.0, 117.4, 104.0, 56.0, 44.0. IR (neat)  $\nu_{\text{max}}$  3363 (w), 3296 (w), 1656 (s), 1603 (m), 1526 (s), 1495 (s), 1457 (m), 1428 (m), 1328 (m), 1265 (s), 1249 (m), 1228 (m), 1187 (m), 1055 (m), 1023 (m), 894 (m), 831 (s), 764 (s)  $\text{cm}^{-1}$ . MS (ESI +ve)  $m/z$  299 ( $[\text{M} + \text{H}]^+$ , 100%). HRMS (ESI +ve TOF) calcd for  $\text{C}_{16}\text{H}_{15}\text{N}_2\text{O}_2\text{S}^+$  299.0849, found 299.0854 ( $[\text{M} + \text{H}]^+$ ).

**6-methoxy-*N*-(3-methylbenzyl)benzo[*d*]thiazole-2-carboxamide 118.** Following General Procedure C, benzothiazole carboxylic acid **95** (100 mg, 0.48 mmol), amine **105** (58 mg, 0.48 mmol), HOBT (72 mg, 0.48 mmol), EDCI (119 mg, 0.62 mmol), and DIPEA (334  $\mu$ L, 1.92 mmol) were stirred in anhydrous DMF (4.8 mL) for 24 h to afford the amide **118** (125 mg, 83%) as a pale yellow solid after preparative TLC plate chromatography ( $\text{CH}_2\text{Cl}_2/\text{MeOH} - 98:2$ ). TLC ( $\text{CH}_2\text{Cl}_2/\text{MeOH} - 98:2$ ):  $R_f = 0.77$ . Mp 99  $^\circ\text{C}$ .  $^1\text{H}$  NMR (400 MHz,  $\text{CDCl}_3$ )  $\delta$  7.88 (d,  $J = 9.2$  Hz, 1H), 7.64 (br s, 1H), 7.37 – 7.05 (m, 6H), 4.63 (s, 2H), 3.89 (s, 3H), 2.35 (s,

3H).  $^{13}\text{C}$  NMR (400 MHz,  $\text{CDCl}_3$ )  $\delta$  161.2, 160.1, 159.1, 147.5, 139.0, 138.7, 137.5, 128.9, 128.8, 128.7, 125.2, 125.0, 117.3, 104.0, 56.0, 44.0, 21.5. IR (neat)  $\nu_{\text{max}}$  3363 (w), 3296 (w), 1656 (s), 1603 (m), 1528 (s), 1495 (s), 1457 (m), 1431 (m), 1327 (m), 1263 (s), 1252 (m), 1227 (m), 1187 (m), 1055 (m), 1021 (m), 897 (s), 831 (s), 763 (s)  $\text{cm}^{-1}$ . MS (ESI +ve)  $m/z$  313 ( $[\text{M} + \text{H}]^+$ , 100%). HRMS (ESI +ve TOF) calcd for  $\text{C}_{17}\text{H}_{17}\text{N}_2\text{O}_2\text{S}^+$  313.1005, found 313.1011 ( $[\text{M} + \text{H}]^+$ ).

***N*-(4-fluorobenzyl)-6-methoxybenzo[*d*]thiazole-2-carboxamide 119.** Following General Procedure C, benzothiazole carboxylic acid **95** (100 mg, 0.48 mmol), amine **106** (60 mg, 0.48 mmol), HOBT (72 mg, 0.48 mmol), EDCI (119 mg, 0.62 mmol), and DIPEA (334  $\mu\text{L}$ , 1.92 mmol) were stirred in anhydrous DMF (4.8 mL) for 24 h to afford the amide **119** (115 mg, 76%) as a yellow solid after preparative TLC plate chromatography ( $\text{CH}_2\text{Cl}_2/\text{MeOH} - 95:5$ ). TLC ( $\text{CH}_2\text{Cl}_2/\text{MeOH} - 95:5$ ):  $R_f = 0.63$ . Mp 103  $^\circ\text{C}$ .  $^1\text{H}$  NMR (400 MHz,  $\text{CDCl}_3$ )  $\delta$  7.88 (d,  $J = 8.8$  Hz, 1H), 7.70 (br s, 1H), 7.37 – 7.32 (m, 3H), 7.13 (dd,  $J = 8.8, 2.4$  Hz, 1H), 7.05 – 7.01 (m, 2H), 4.64 (d,  $J = 6.4$  Hz, 2H), 3.89 (s, 3H).  $^{13}\text{C}$  NMR (100 MHz,  $\text{CDCl}_3$ )  $\delta$  162.4 (d,  $^1J_{\text{CF}} = 244.6$  Hz), 160.9, 160.0, 159.0, 147.4, 138.9, 133.4, 129.7 (d,  $^3J_{\text{CF}} = 8.1$  Hz), 124.9, 117.3, 156.7 (d,  $^2J_{\text{CF}} = 21.2$  Hz), 103.9, 55.9, 43.2. IR (neat)  $\nu_{\text{max}}$  33365 (m), 3010 (w), 1653 (s), 1603 (m), 1556 (s), 1456 (s), 1440 (m), 1425 (m), 1328 (m), 1304 (s), 1282 (s), 1255 (s), 1217 (m), 1118 (m), 1058 (m), 1025 (m), 848 (m), 747 (s)  $\text{cm}^{-1}$ . MS (ESI +ve)  $m/z$  317 ( $[\text{M} + \text{H}]^+$ , 100%). HRMS (ESI +ve TOF) calcd for  $\text{C}_{16}\text{H}_{14}\text{FN}_2\text{O}_2\text{S}^+$  317.0755, found 317.0760 ( $[\text{M} + \text{H}]^+$ ).

***N*-(3-fluorobenzyl)-6-methoxybenzo[*d*]thiazole-2-carboxamide 120.** Following General Procedure C, benzothiazole carboxylic acid **95** (100 mg, 0.48 mmol), amine **107** (60 mg, 0.48 mmol), HOBT (72 mg, 0.48 mmol), EDCI (119 mg, 0.62 mmol), and DIPEA (334  $\mu\text{L}$ , 1.92 mmol) were stirred in anhydrous DMF (4.8 mL) for 24 h to afford the amide **120** (103 mg, 68%) as a pale yellow solid after preparative TLC plate chromatography ( $\text{CH}_2\text{Cl}_2/\text{MeOH} - 95:5$ ). TLC ( $\text{CH}_2\text{Cl}_2/\text{MeOH} - 95:5$ ):  $R_f = 0.69$ . Mp 122  $^\circ\text{C}$ .  $^1\text{H}$  NMR (400 MHz, DMSO)  $\delta$  9.67 (t,  $J = 6.4$  Hz, 1H), 8.01 (d,  $J = 9.2$  Hz, 1H), 7.78 (d,  $J = 2.4$  Hz, 1H), 7.40 – 7.35 (m, 1H), 7.25 – 7.15 (m, 3H), 7.10 – 7.06 (m, 1H), 4.50 (d,  $J = 6.4$  Hz, 2H), 3.87 (s, 3H).  $^{13}\text{C}$  NMR (100 MHz, DMSO)  $\delta$  162.2 (d,  $^1J_{\text{CF}} = 242.0$  Hz), 161.4, 159.7, 158.5, 147.1, 141.9 (d,  $^3J_{\text{CF}} = 7.0$  Hz), 138.0, 130.3 (d,  $^3J_{\text{CF}} = 8.4$  Hz), 124.6, 123.42 (d,  $^4J_{\text{CF}} = 2.4$  Hz), 117.2, 114.1 (d,  $^2J_{\text{CF}} = 21.7$  Hz), 113.7 (d,  $^2J_{\text{CF}} = 20.7$  Hz), 104.8, 55.8, 42.2. IR (neat)  $\nu_{\text{max}}$  3303 (m), 1655 (s), 1603 (m), 1589 (s), 1530 (s), 1495 (s), 1466 (m), 1448 (m), 1328 (m), 1301 (s), 1270 (s), 1248 (s), 1229 (m), 1149 (m), 1055 (m), 1023 (m), 888 (m), 831 (m), 733 (m)  $\text{cm}^{-1}$ . MS (ESI +ve)  $m/z$

317 ( $[M + H]^+$ , 100%). HRMS (ESI +ve TOF) calcd for  $C_{16}H_{14}FN_2O_2S^+$  317.0755, found 317.0760 ( $[M + H]^+$ ).

**6-methoxy-*N*-(4-(trifluoromethyl)benzyl)benzo[*d*]thiazole-2-carboxamide 121.** Following **General Procedure C**, benzothiazole carboxylic acid **95** (100 mg, 0.48 mmol), amine **108** (84 mg, 0.48 mmol), HOBT (72 mg, 0.48 mmol), EDCI (119 mg, 0.62 mmol), and DIPEA (334  $\mu$ L, 1.92 mmol) were stirred in anhydrous DMF (4.8 mL) for 24 h to afford the amide **121** (129 mg, 73%) as a pale yellow solid after preparative TLC plate chromatography ( $CH_2Cl_2/MeOH - 95:5$ ). TLC ( $CH_2Cl_2/MeOH - 95:5$ ):  $R_f = 0.71$ . Mp 123 °C.  $^1H$  NMR (400 MHz, DMSO)  $\delta$  9.74 (t,  $J = 6.4$  Hz, 1H), 8.01 (d,  $J = 9.2$  Hz, 1H), 7.78 (d,  $J = 2.8$  Hz, 1H), 7.70 (d,  $J = 8.0$  Hz, 2H), 7.57 (d,  $J = 8.0$  Hz, 2H), 7.22 (dd,  $J = 9.2, 2.8$  Hz, 1H), 4.57 (d,  $J = 6.4$  Hz, 2H), 3.87 (s, 3H).  $^{13}C$  NMR (100 MHz, DMSO)  $\delta$  161.3, 159.8, 158.5, 147.1, 143.8, 138.0, 128.1, 127.7 (q,  $^2J_{CF} = 31.8$  Hz), 126.5 (q,  $^3J_{CF} = 3.5$  Hz), 125.2 (q,  $^1J_{CF} = 270.4$  Hz), 124.6, 117.2, 104.8, 55.8, 42.4. IR (neat)  $\nu_{max}$  3392 (m), 1676 (m), 1620 (m), 1602 (s), 1554 (s), 1494 (s), 1453 (m), 1436 (m), 1332 (m), 1300 (s), 1270 (s), 1247 (s), 1224 (m), 1150 (m), 1056 (m), 1015 (m), 848 (m), 831 (m), 747 (m)  $cm^{-1}$ . MS (ESI +ve)  $m/z$  367 ( $[M + H]^+$ , 100%). HRMS (ESI +ve TOF) calcd for  $C_{17}H_{14}F_3N_2O_2S^+$  367.0723, found 367.0728 ( $[M + H]^+$ ).

**Sodium 6-methoxybenzo[*d*]thiazole-2-carboxylate 122.**<sup>13</sup> To a solution of benzothiazole carboxylic acid **95** (500 mg, 2.39 mmol) in MeOH (25 mL) was added a solution of 0.1 M NaOH (25 mL, 2.50 mmol), and the reaction was stirred at rt for 2 h. The solvents were removed under reduced pressure at 40 °C, and the resulting material suspended in H<sub>2</sub>O (1.0 mL) and EtOH (5.0 mL), and evaporated to dryness. The solid was dissolved in  $CH_2Cl_2$ , and evaporated to afford the benzothiazole salt **122** (520 mg, 98%) as a pale yellow solid. The spectroscopic data was in agreement with that previously reported. TLC ( $CH_2Cl_2/MeOH - 90:10$ ):  $R_f = 0.73$ .  $^1H$  NMR (400 MHz, DMSO)  $\delta$  7.92 (d,  $J = 8.8$  Hz, 1H), 7.57 (d,  $J = 2.8$  Hz, 1H), 7.09 (dd,  $J = 8.8, 2.8$  Hz, 1H), 3.82 (s, 3H).  $^{13}C$  NMR (400 MHz, DMSO)  $\delta$  170.1, 162.0, 157.6, 147.7, 138.0, 124.2, 115.4, 104.4, 55.6. MS (ESI)  $m/z$  231 ( $[M]$ , 100%).

**4-cyanobenzyl 6-methoxybenzo[*d*]thiazole-2-carboxylate 127.** Following **General Procedure D**, benzothiazole salt **122** (90 mg, 0.39 mmol) and alkyl bromide **123** (76 mg, 0.39 mmol) were stirred in anhydrous DMF (3.9 mL) for 24 h to afford the ester **127** (108 mg, 85%) as a yellow solid after preparative TLC plate chromatography ( $CH_2Cl_2/MeOH - 97:3$ ). TLC ( $CH_2Cl_2/MeOH - 97:3$ ):  $R_f = 0.79$ . Mp 120 °C.  $^1H$  NMR (500 MHz,  $CDCl_3$ )  $\delta$  8.11 (d,  $J = 8.8$  Hz, 1H), 7.70 (d,  $J = 8.0$  Hz, 2H), 7.61 (d,  $J = 8.0$  Hz, 2H), 7.36 (d,  $J = 2.8$  Hz, 1H), 7.19 (dd,

$J = 8.8, 2.8$  Hz, 1H), 5.53 (s, 2H), 3.91 (s, 3H).  $^{13}\text{C}$  NMR (500 MHz,  $\text{CDCl}_3$ )  $\delta$  160.6, 160.0, 154.5, 148.0, 140.4, 139.0, 132.9, 128.9, 126.4, 118.6, 118.1, 112.7, 103.5, 67.0, 56.0. IR (neat)  $\nu_{\text{max}}$  2944 (w), 2840 (w), 2224 (m), 1741 (s), 1682 (w), 1604 (m), 1547 (m), 1494 (s), 1452 (m), 1325 (m), 1274 (m), 1236 (s), 1221 (m), 1179 (m), 1056 (m), 1028 (m), 903 (m), 858 (m), 830 (s), 751 (m)  $\text{cm}^{-1}$ . MS (ESI +ve)  $m/z$  325 ( $[\text{M} + \text{H}]^+$ , 100%). HRMS (ESI +ve TOF) calcd for  $\text{C}_{17}\text{H}_{13}\text{N}_2\text{O}_3\text{S}^+$  325.0641, found 325.0613 ( $[\text{M} + \text{H}]^+$ ).

**3-fluorobenzyl 6-methoxybenzo[*d*]thiazole-2-carboxylate 128.** Following **General Procedure D**, benzothiazole salt **122** (90 mg, 0.39 mmol) and alkyl bromide **124** (74 mg, 0.39 mmol) were stirred in anhydrous DMF (3.9 mL) for 24 h to afford the ester **128** (109 mg, 88%) as a pale yellow solid after preparative TLC plate chromatography ( $\text{CH}_2\text{Cl}_2/\text{MeOH} - 95:5$ ). TLC ( $\text{CH}_2\text{Cl}_2/\text{MeOH} - 95:5$ ):  $R_f = 0.71$ . Mp 89 °C.  $^1\text{H}$  NMR (500 MHz, DMSO)  $\delta$  8.10 (d,  $J = 8.8$  Hz, 1H), 7.80 – 7.78 (m, 1H), 7.50 – 7.46 (m, 1H), 7.38 – 7.34 (m, 2H), 7.25 – 7.21 (m, 2H), 5.45 (s, 2H), 3.86 (s, 3H).  $^{13}\text{C}$  NMR (125 MHz, DMSO)  $\delta$  162.2 (d,  $^1J_{\text{CF}} = 242.8$  Hz), 159.9, 159.4, 154.8, 147.3, 138.3, 138.0 (d,  $^3J_{\text{CF}} = 7.6$  Hz), 130.8, 125.8, 124.5, 118.0, 115.3 (d,  $^2J_{\text{CF}} = 43.0$  Hz), 115.3, 104.5, 66.9, 56.0. IR (neat)  $\nu_{\text{max}}$  3667 (w), 2951 (w), 2224 (w), 1740 (s), 1690 (m), 1599 (m), 1552 (m), 1493 (s), 1452 (m), 1433 (m), 1378 (m), 1331 (m), 1306 (m), 1247 (m), 1224 (s), 1180 (s), 1047 (m), 1024 (m), 956 (s), 873 (m), 738 (s)  $\text{cm}^{-1}$ . MS (ESI +ve)  $m/z$  318 ( $[\text{M} + \text{H}]^+$ , 100%), 340 ( $[\text{M} + \text{Na}]^+$ , 20%). HRMS (ESI +ve TOF) calcd for  $\text{C}_{16}\text{H}_{13}\text{FNO}_3\text{S}^+$  318.0595, found 318.0595 ( $[\text{M} + \text{H}]^+$ ).

**4-(trifluoromethyl)benzyl 6-methoxybenzo[*d*]thiazole-2-carboxylate 129.** Following **General Procedure D**, benzothiazole salt **122** (90 mg, 0.39 mmol) and alkyl bromide **125** (93 mg, 0.39 mmol) were stirred in anhydrous DMF (3.9 mL) for 24 h to afford the ester **129** (112 mg, 78%) as a pale yellow crystal after preparative TLC plate chromatography ( $\text{CH}_2\text{Cl}_2/\text{MeOH} - 95:5$ ). TLC ( $\text{CH}_2\text{Cl}_2/\text{MeOH} - 95:5$ ):  $R_f = 0.81$ . Mp 106 °C.  $^1\text{H}$  NMR (500 MHz, DMSO)  $\delta$  8.11 (d,  $J = 8.8$  Hz, 1H), 7.82 – 7.79 (m, 3H), 7.73 (d,  $J = 8.0$  Hz, 2H), 7.25 (dd,  $J = 8.8, 2.4$  Hz, 1H), 5.55 (s, 2H), 3.87 (s, 3H).  $^{13}\text{C}$  NMR (125 MHz, DMSO)  $\delta$  159.9, 159.4, 154.7, 147.3, 140.1, 138.4, 128.9, 127.7 (q,  $^2J_{\text{CF}} = 32.0$  Hz), 126.6 (q,  $^3J_{\text{CF}} = 3.2$  Hz), 125.8, 125.6 (q,  $^1J_{\text{CF}} = 270.4$  Hz), 118.0, 104.5, 66.8, 56.0. IR (neat)  $\nu_{\text{max}}$  2965 (w), 2926 (w), 2840 (w), 1700 (m), 1600 (m), 1550 (m), 1498 (s), 1455 (m), 1434 (m), 1419 (m), 1381 (m), 1326 (s), 1305 (m), 1244 (s), 1223 (m), 1116 (s), 1107 (s), 1092 (s), 1066 (s), 1048 (s), 829 (s), 760 (m), 737 (m)  $\text{cm}^{-1}$ . MS (ESI +ve)  $m/z$  368 ( $[\text{M} + \text{H}]^+$ , 100%). HRMS (ESI +ve TOF) calcd for  $\text{C}_{17}\text{H}_{13}\text{F}_3\text{NO}_3\text{S}^+$  368.0563, found 368.0616 ( $[\text{M} + \text{H}]^+$ ).

**4-nitrophenethyl 6-methoxybenzo[*d*]thiazole-2-carboxylate 130.** Following **General Procedure D**, benzothiazole salt **122** (90 mg, 0.39 mmol) and alkyl bromide **126** (90 mg, 0.39 mmol) were stirred in anhydrous DMF (3.9 mL) for 24 h to afford the ester **130** (105 mg, 75%) as a pale yellow solid after preparative TLC plate chromatography (CH<sub>2</sub>Cl<sub>2</sub>/MeOH – 97:3). TLC (CH<sub>2</sub>Cl<sub>2</sub>/MeOH – 97:3): R<sub>f</sub> = 0.77. Mp 130 °C. <sup>1</sup>H NMR (400 MHz, CDCl<sub>3</sub>) δ 8.19 (d, *J* = 8.4 Hz, 2H), 8.11 (d, *J* = 8.8 Hz, 1H), 7.48 (d, *J* = 8.4 Hz, 2H), 7.36 (d, *J* = 2.4 Hz, 1H), 7.19 (dd, *J* = 8.8, 2.4 Hz, 1H), 4.71 (t, *J* = 7.2 Hz, 2H), 3.91 (s, 3H), 3.27 (t, *J* = 7.2 Hz, 2H). <sup>13</sup>C NMR (400 MHz, CDCl<sub>3</sub>) δ 160.5, 160.0, 154.7, 148.0, 147.2, 145.1, 138.9, 130.1, 126.4, 124.0, 118.0, 103.5, 66.0, 56.0, 35.1. IR (neat) ν<sub>max</sub> 3122 (w), 2900 (w), 1609 (m), 1554 (s), 1520 (s), 1490 (m), 1433 (m), 1377 (m), 1356 (m), 1310 (m), 1270 (s), 1214 (m), 1159 (m), 1059 (m), 1025 (m), 898 (m), 811 (m) cm<sup>-1</sup>. MS (ESI +ve) *m/z* 359 ([M + H]<sup>+</sup>, 100%). HRMS (ESI +ve TOF) calcd for C<sub>17</sub>H<sub>15</sub>N<sub>2</sub>O<sub>5</sub>S<sup>+</sup> 359.0696, found 359.0697 ([M + H]<sup>+</sup>).

### 3. $^1\text{H}$ NMR and $^{13}\text{C}$ NMR Spectra of Final Compounds

Figure S1.  $^1\text{H}$  NMR for **30** (400 MHz,  $\text{DMSO-}d_6$ )

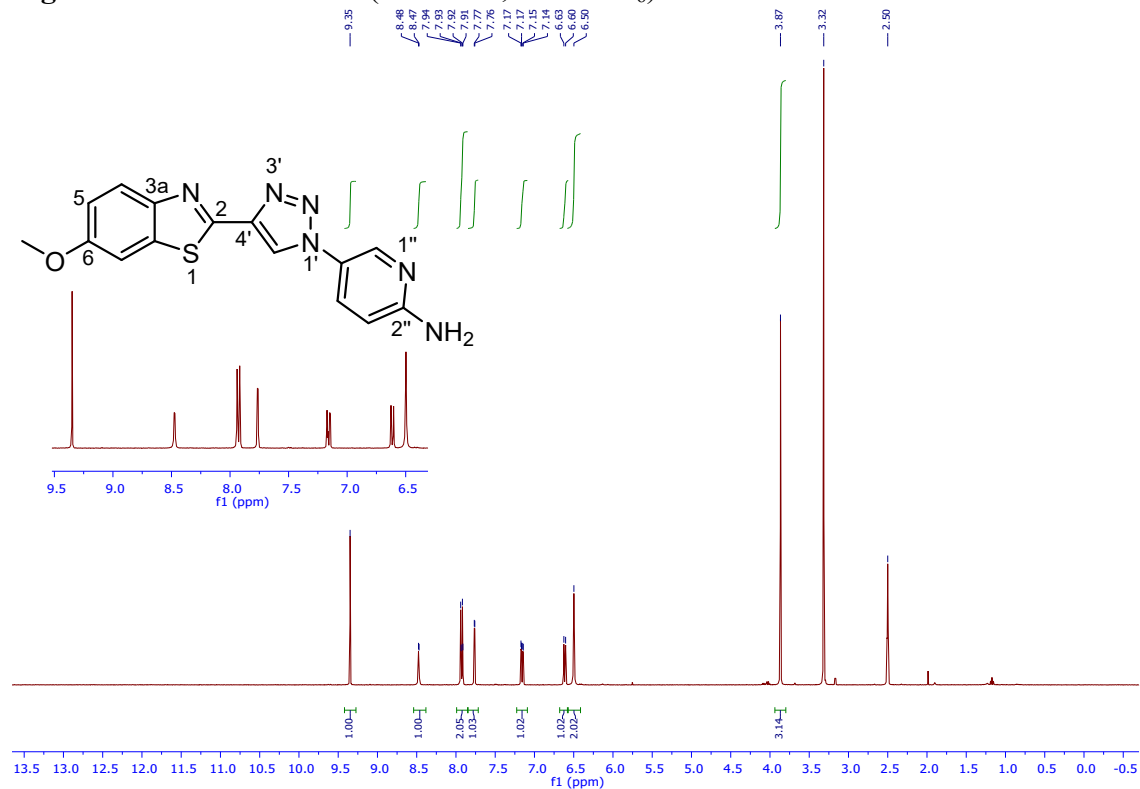

Figure S2.  $^{13}\text{C}$  NMR for **30** (400 MHz,  $\text{DMSO-}d_6$ )

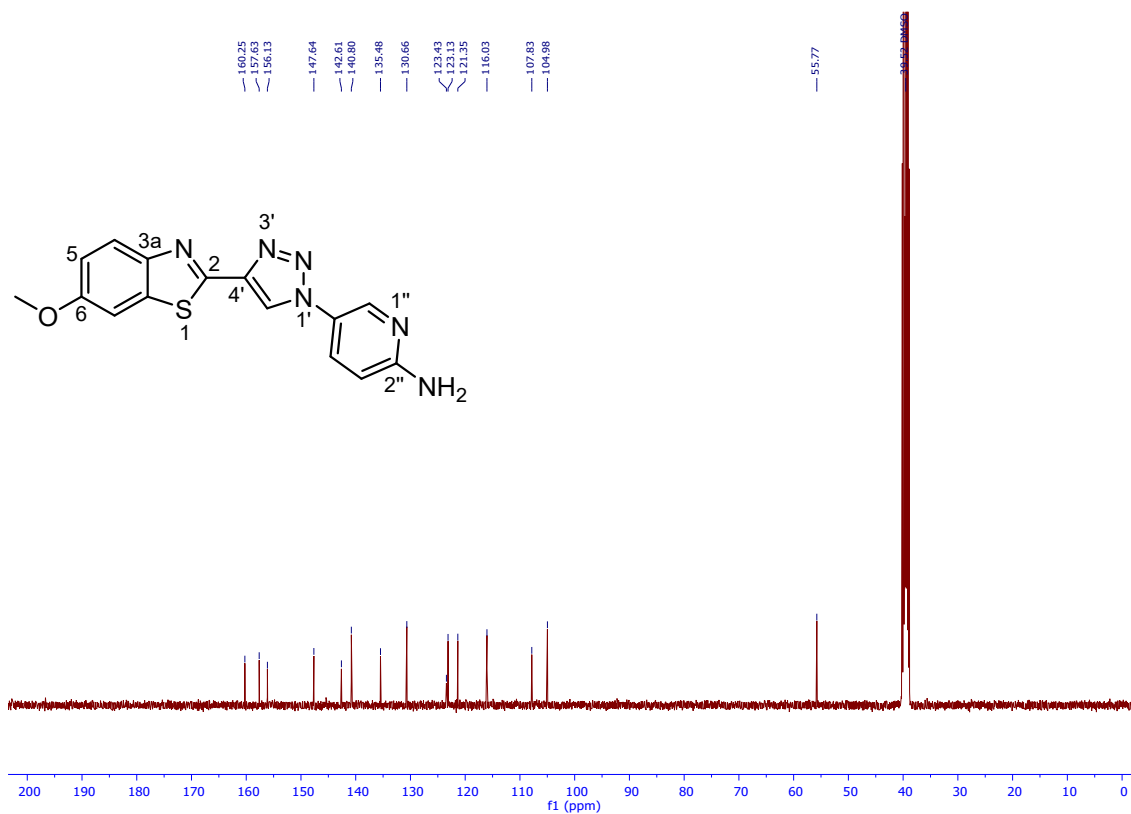

**Figure S3.**  $^1\text{H}$  NMR for **31** (400 MHz,  $\text{DMSO-}d_6$ )

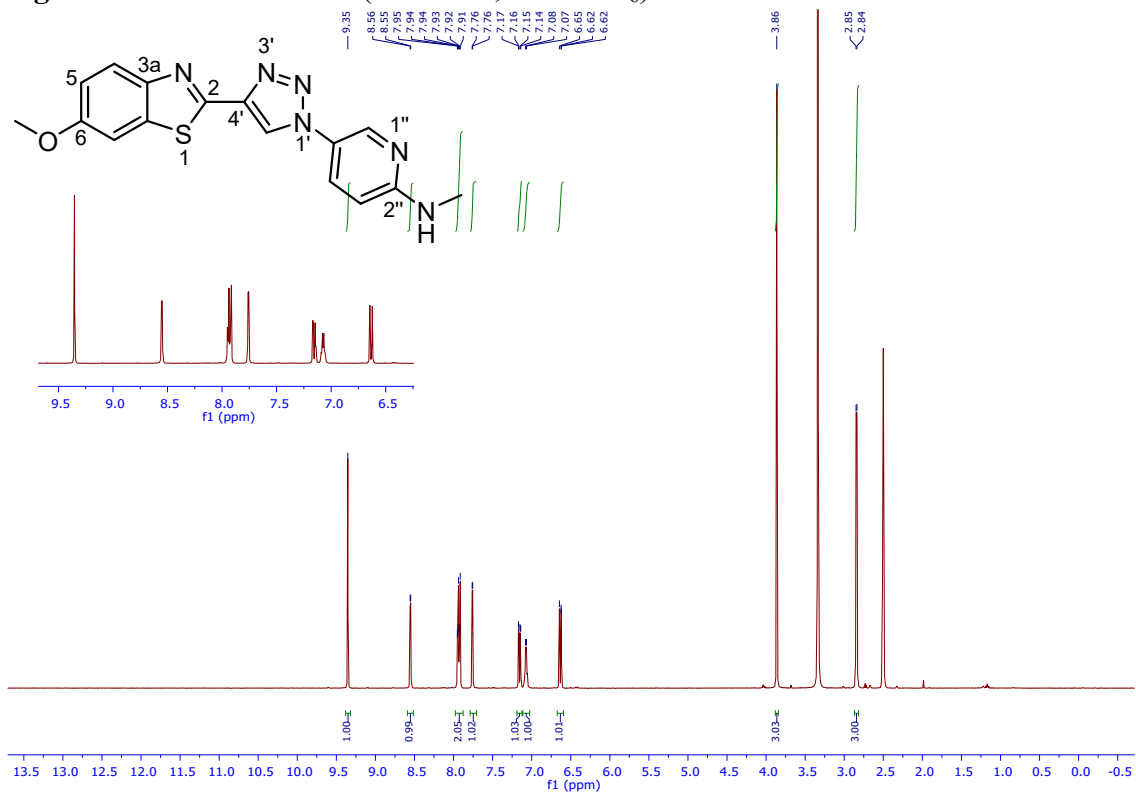

**Figure S4.**  $^{13}\text{C}$  NMR for **31** (400 MHz,  $\text{DMSO-}d_6$ )

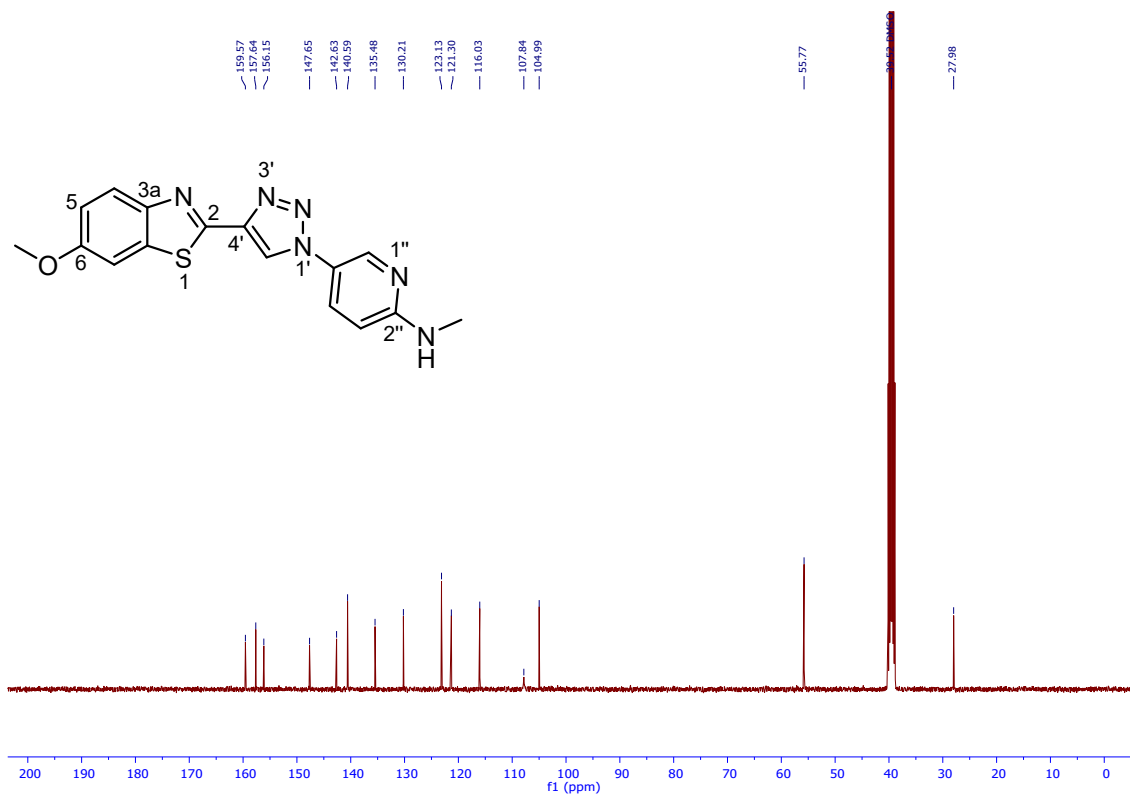

Figure S5.  $^1\text{H}$  NMR for **32** (500 MHz,  $\text{DMSO-}d_6$ )

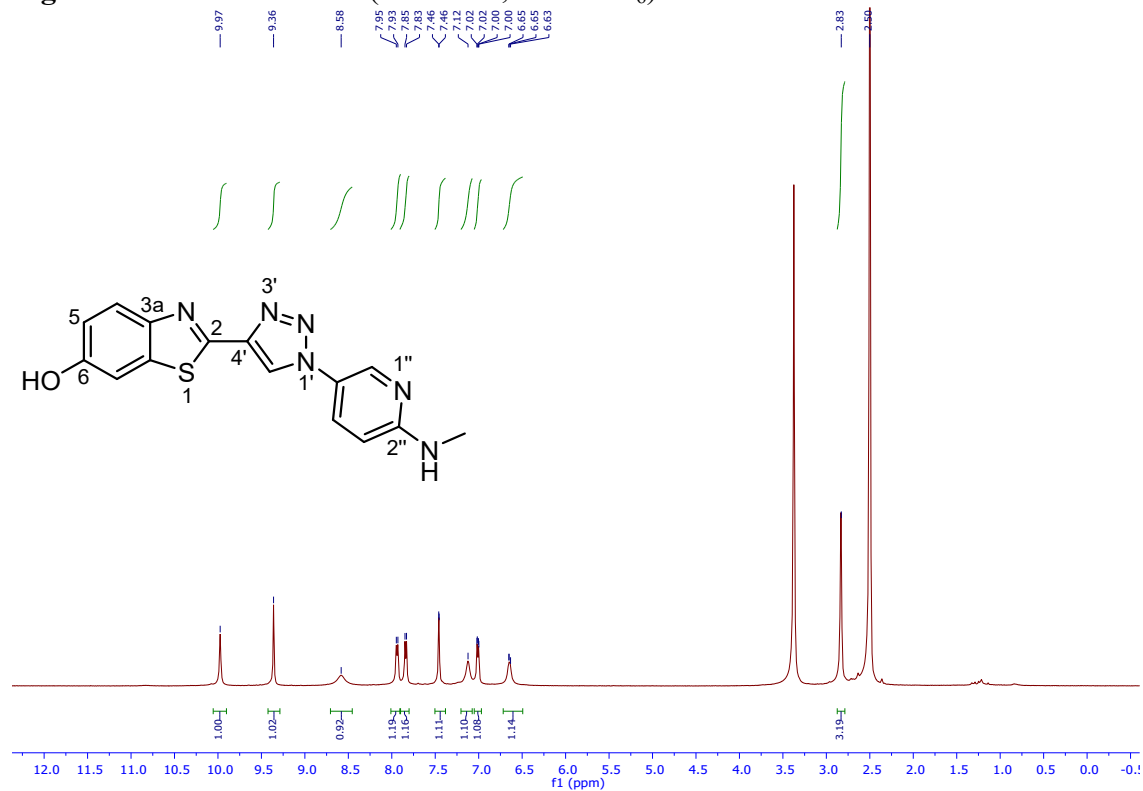

Figure S6.  $^{13}\text{C}$  NMR for **32** (500 MHz,  $\text{DMSO-}d_6$ )



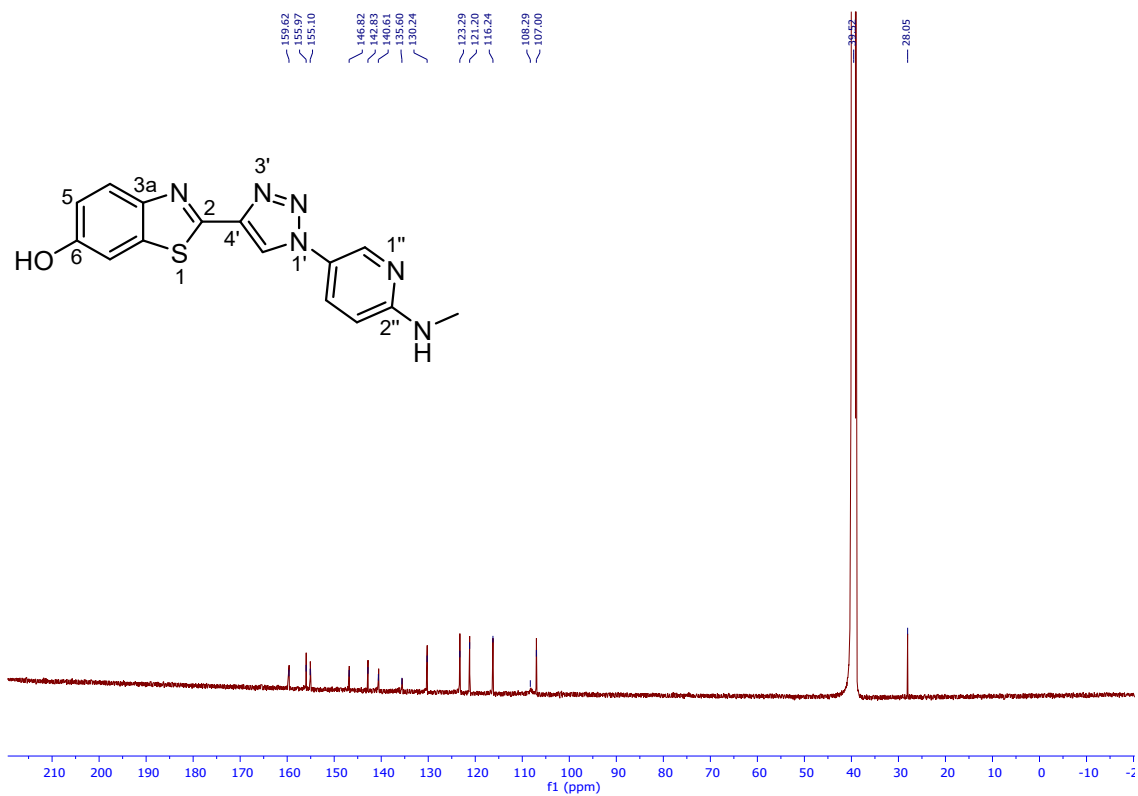

Figure S7.  $^1\text{H}$  NMR for **64** (500 MHz,  $\text{DMSO-}d_6$ )

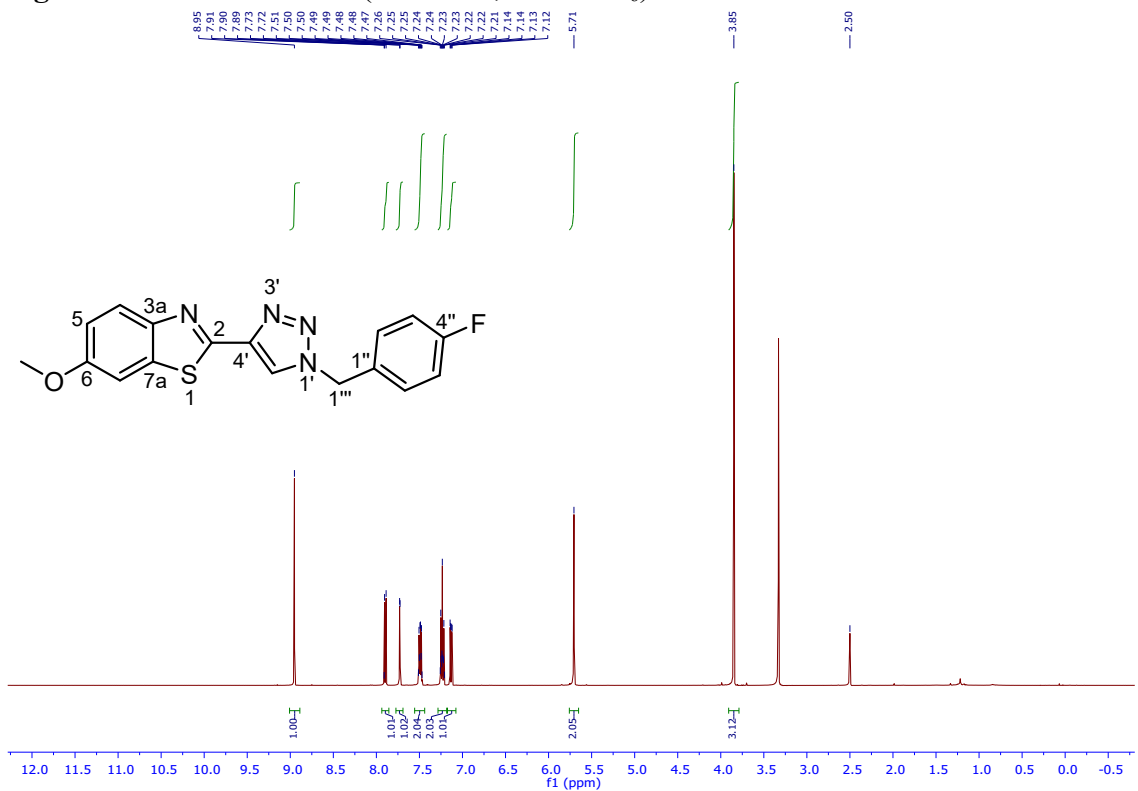

Figure S8.  $^{13}\text{C}$  NMR for **64** (125 MHz,  $\text{DMSO-}d_6$ )

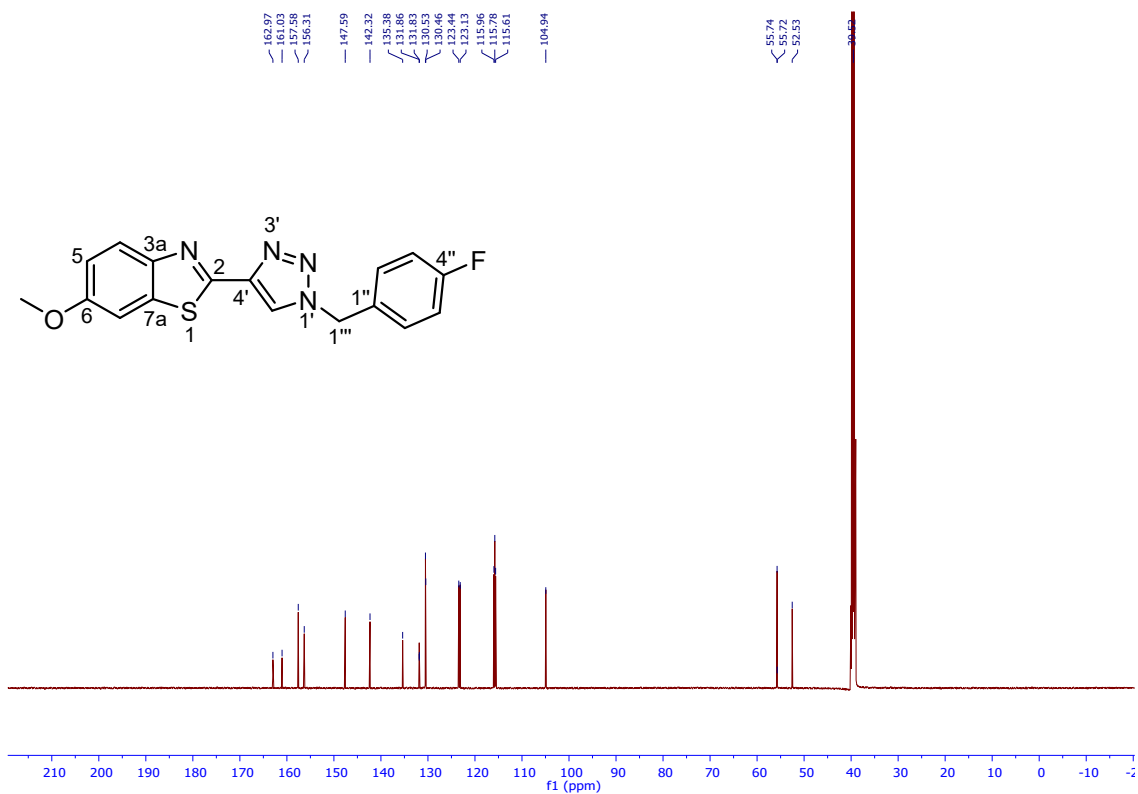

**Figure S9.** <sup>1</sup>H NMR for **65** (400 MHz, DMSO-*d*<sub>6</sub>)

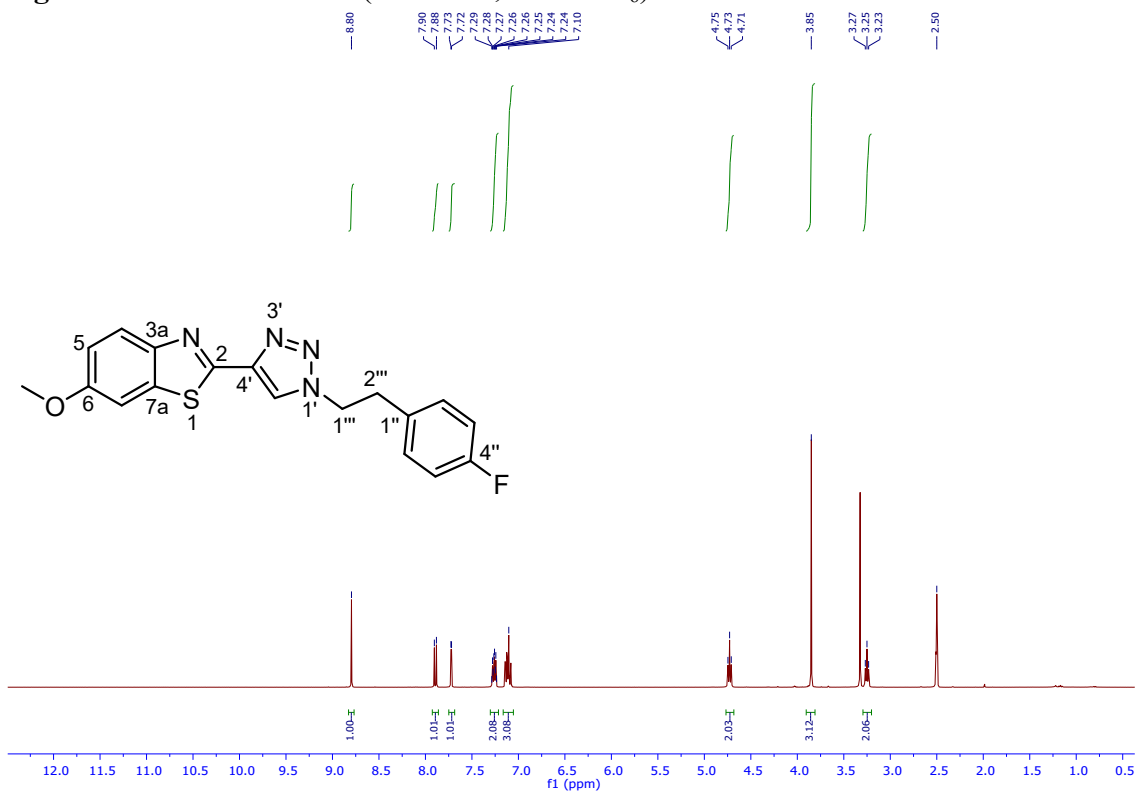

**Figure S10.** <sup>13</sup>C NMR for **65** (100 MHz, DMSO-*d*<sub>6</sub>)

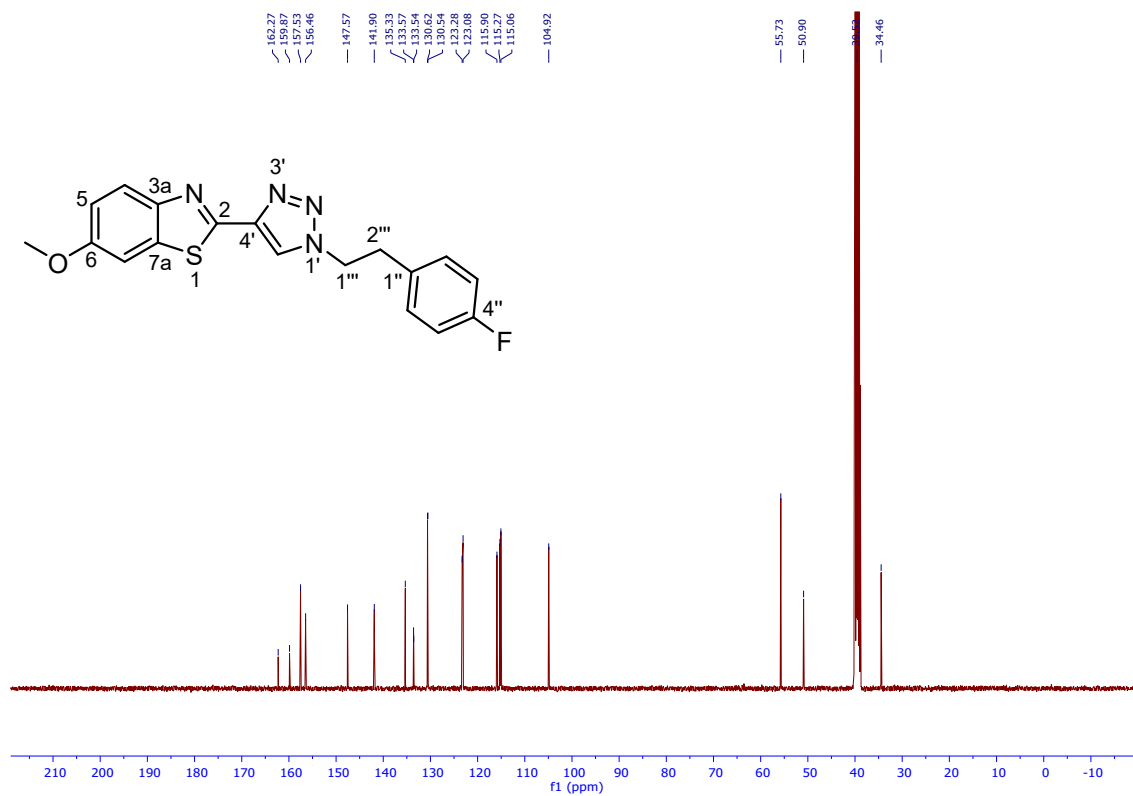

Figure S11. <sup>1</sup>H NMR for **66** (400 MHz, DMSO-*d*<sub>6</sub>)

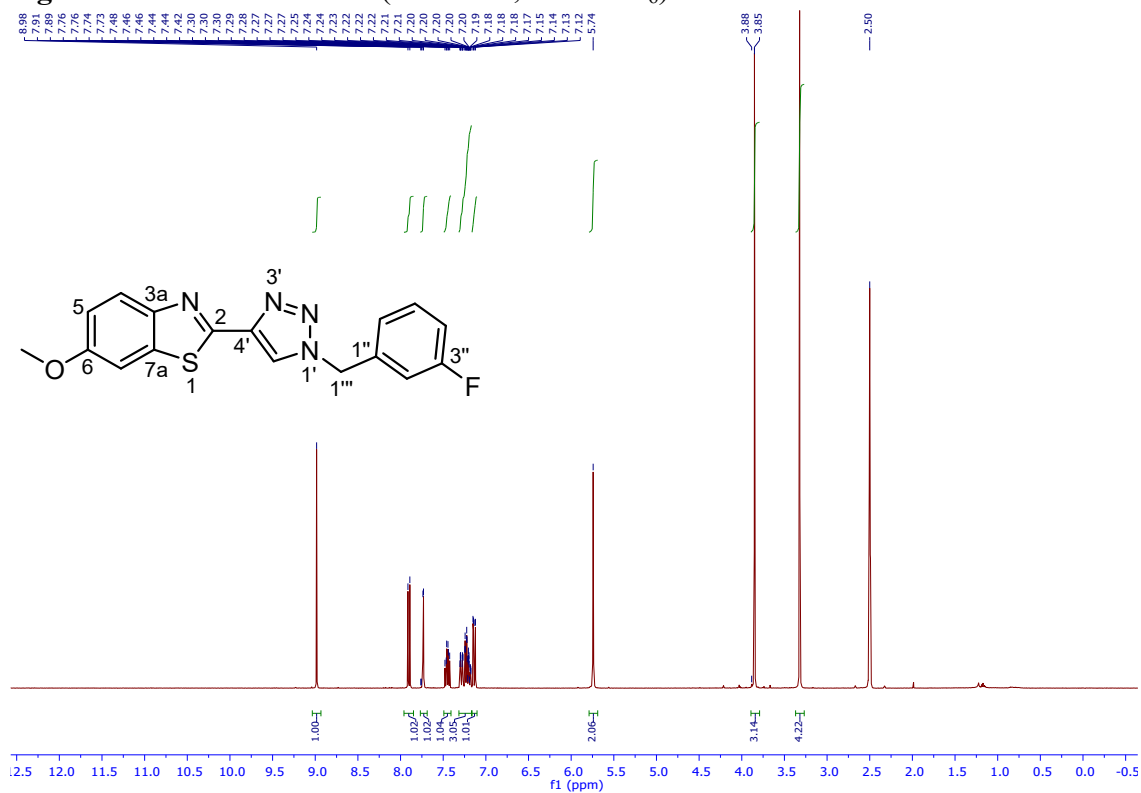

Figure S12. <sup>13</sup>C NMR for **66** (100 MHz, DMSO-*d*<sub>6</sub>)

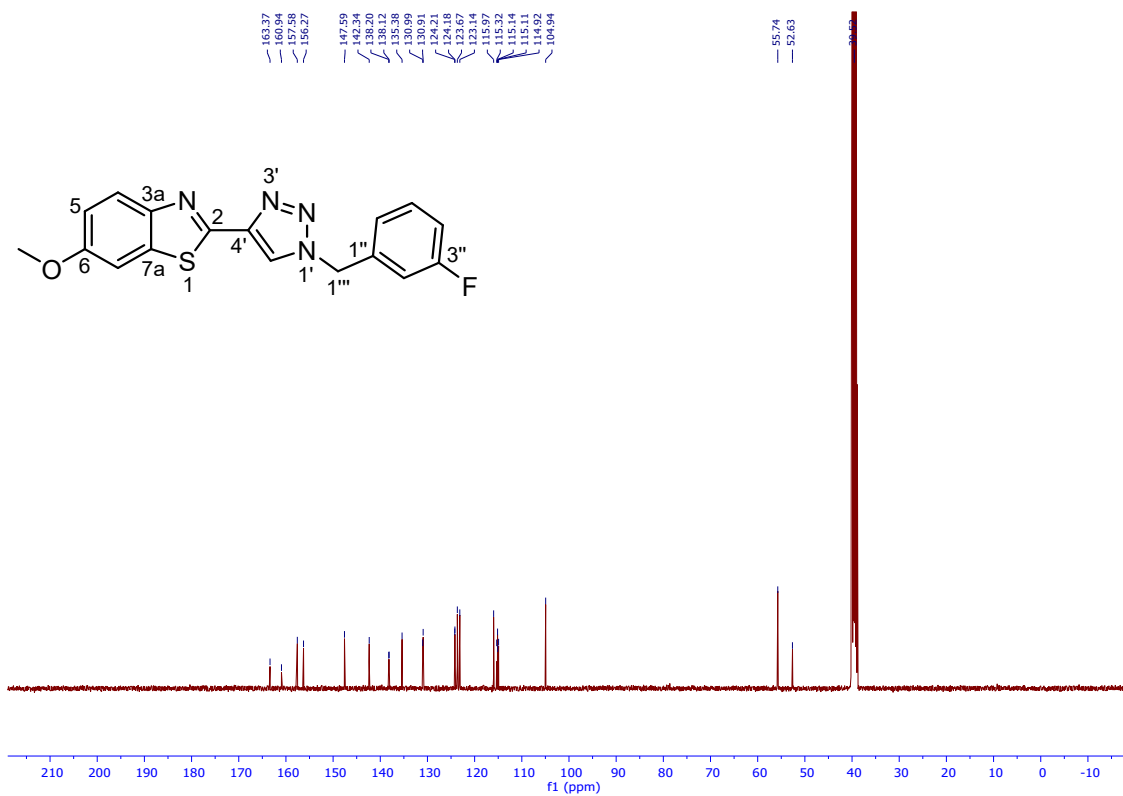

Figure S13.  $^1\text{H}$  NMR for **67** (400 MHz,  $\text{DMSO-}d_6$ )

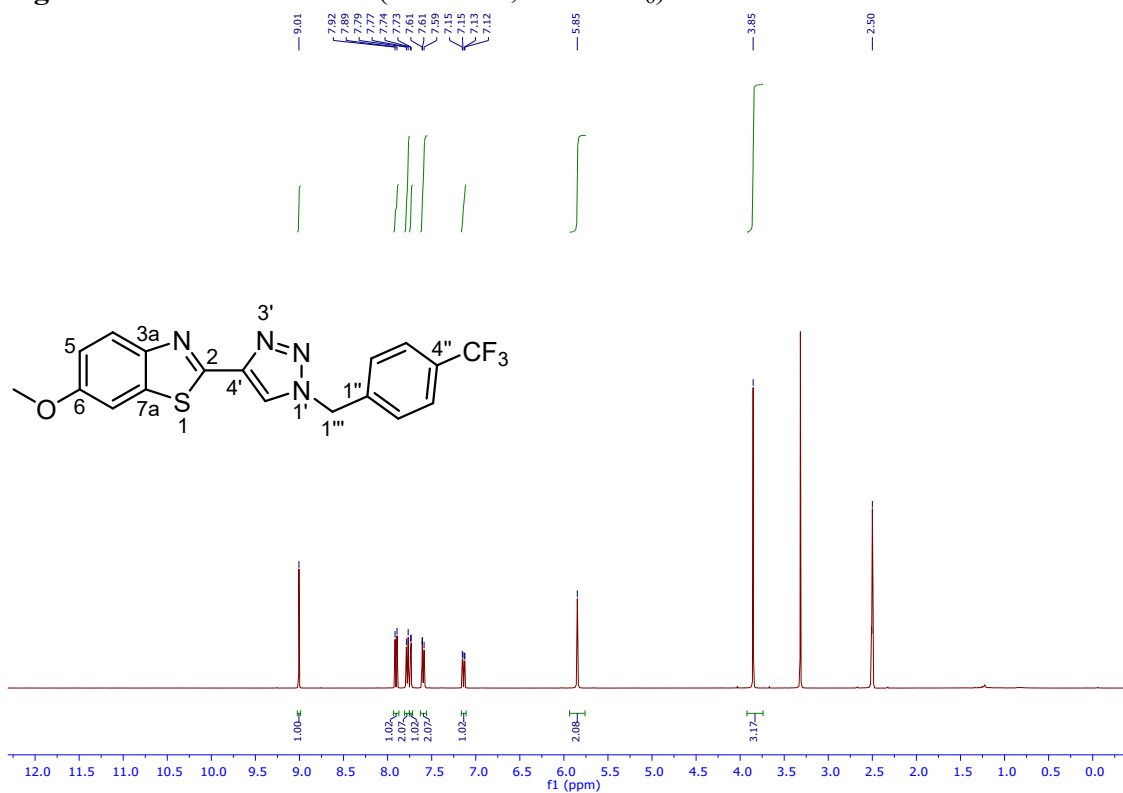

Figure S14.  $^{13}\text{C}$  NMR for **67** (100 MHz,  $\text{DMSO-}d_6$ )

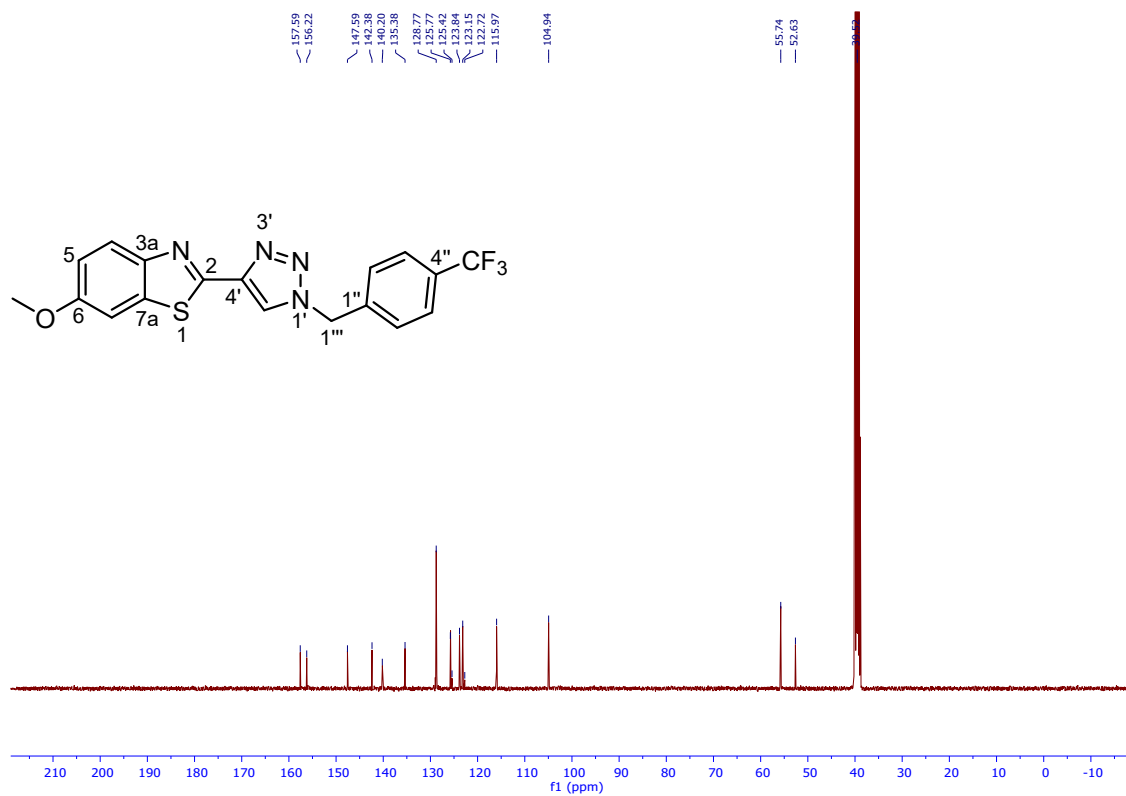

**Figure S15.** <sup>1</sup>H NMR for **68** (500 MHz, DMSO-*d*<sub>6</sub>)

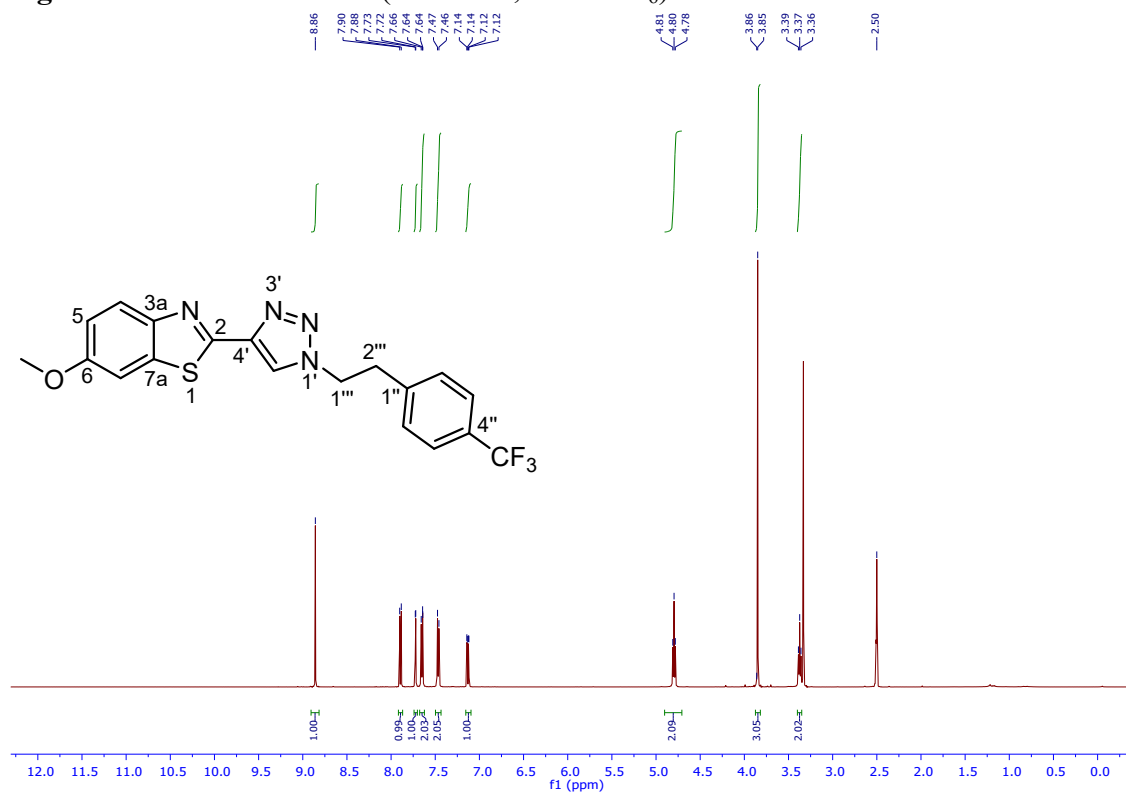

**Figure S16.** <sup>13</sup>C NMR for **68** (125 MHz, DMSO-*d*<sub>6</sub>)

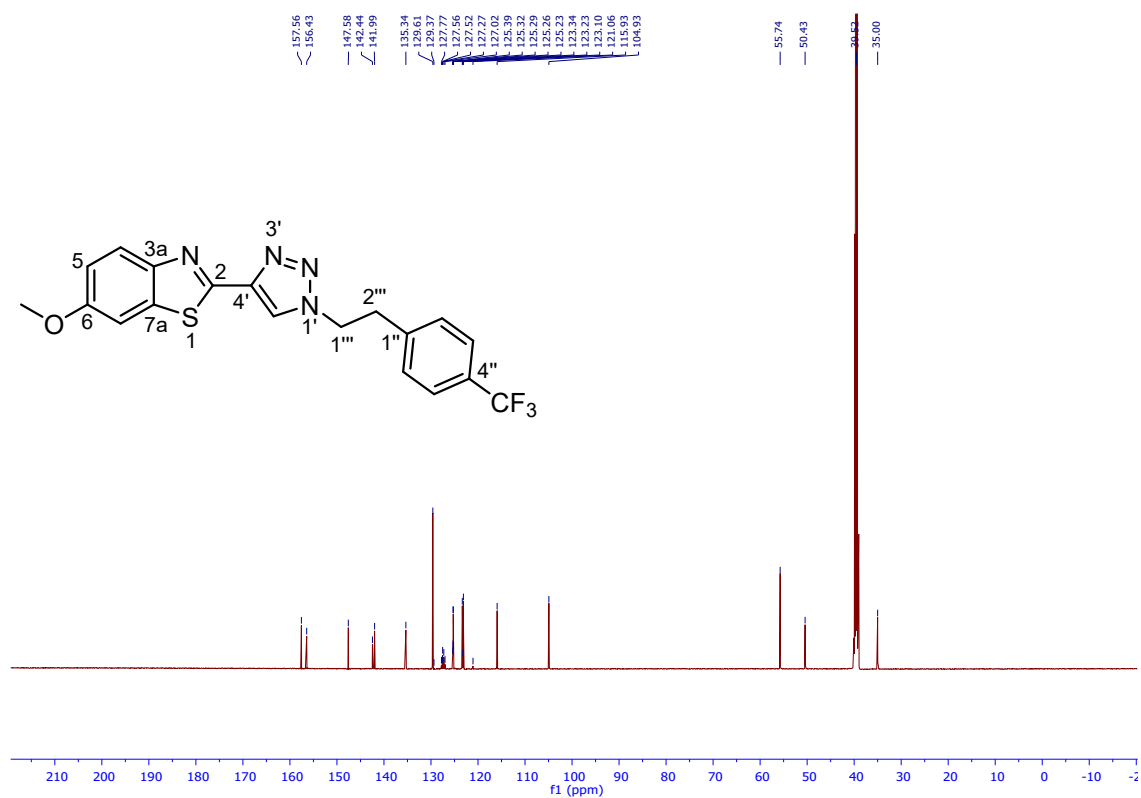

**Figure S17.** <sup>1</sup>H NMR for **69** (500 MHz, DMSO-*d*<sub>6</sub>)

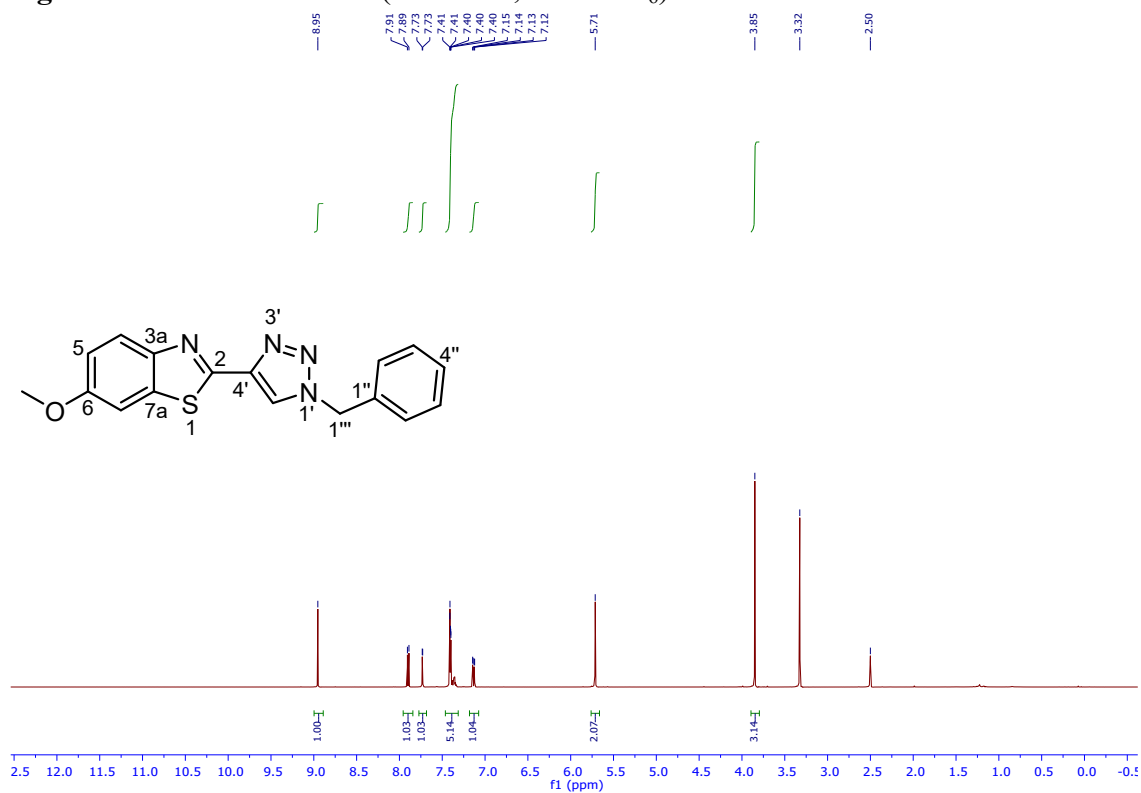

**Figure S18.** <sup>13</sup>C NMR for **69** (500 MHz, DMSO-*d*<sub>6</sub>)

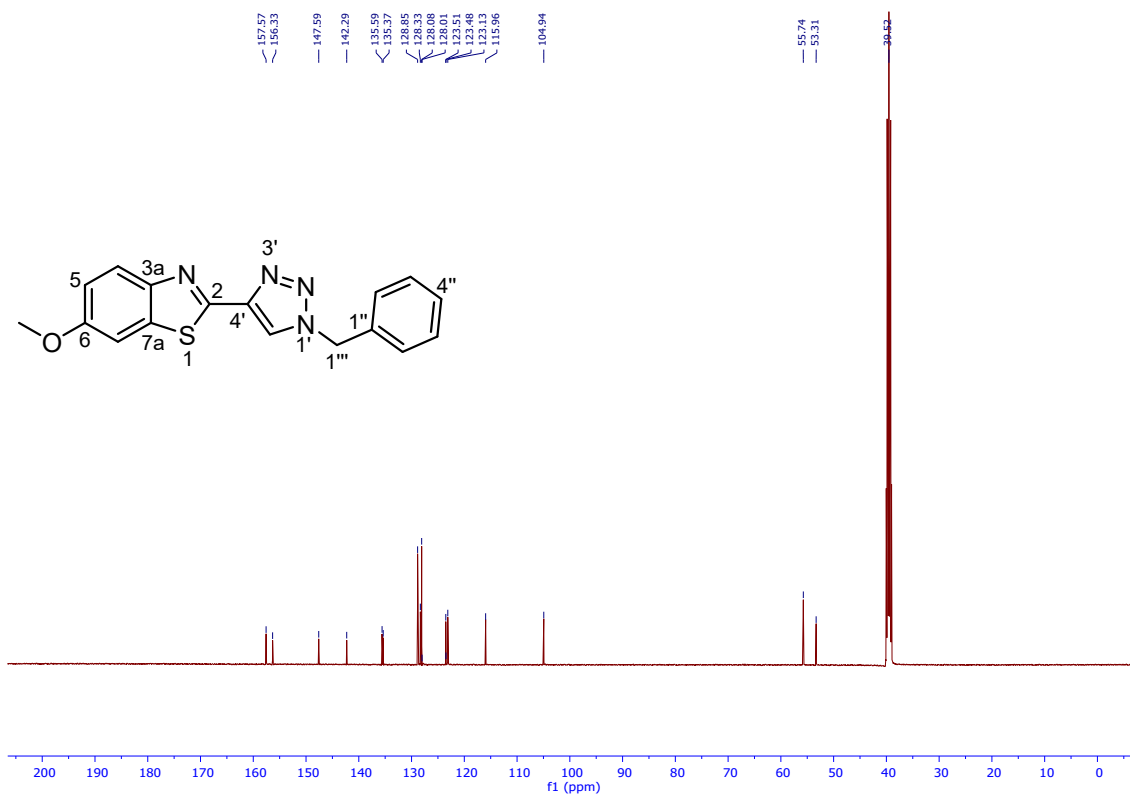

Figure S19. <sup>1</sup>H NMR for 70 (400 MHz, DMSO-*d*<sub>6</sub>)

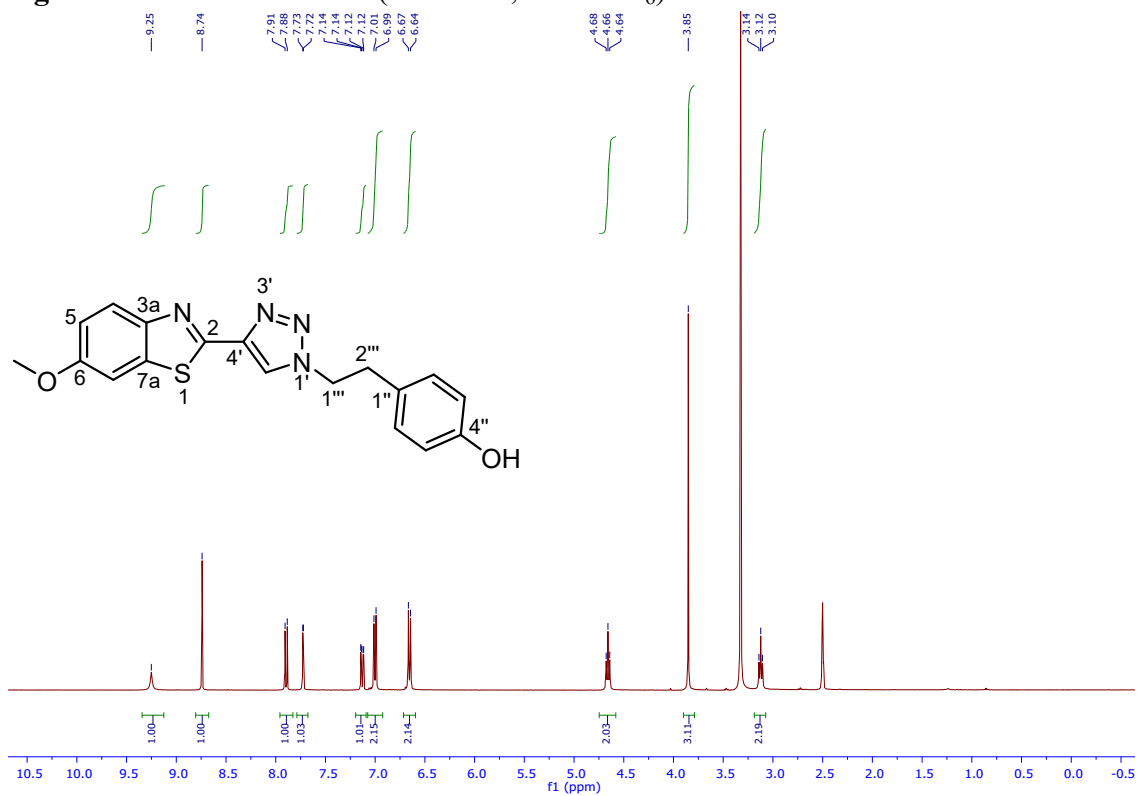

Figure S20. <sup>13</sup>C NMR for 70 (400 MHz, DMSO-*d*<sub>6</sub>)

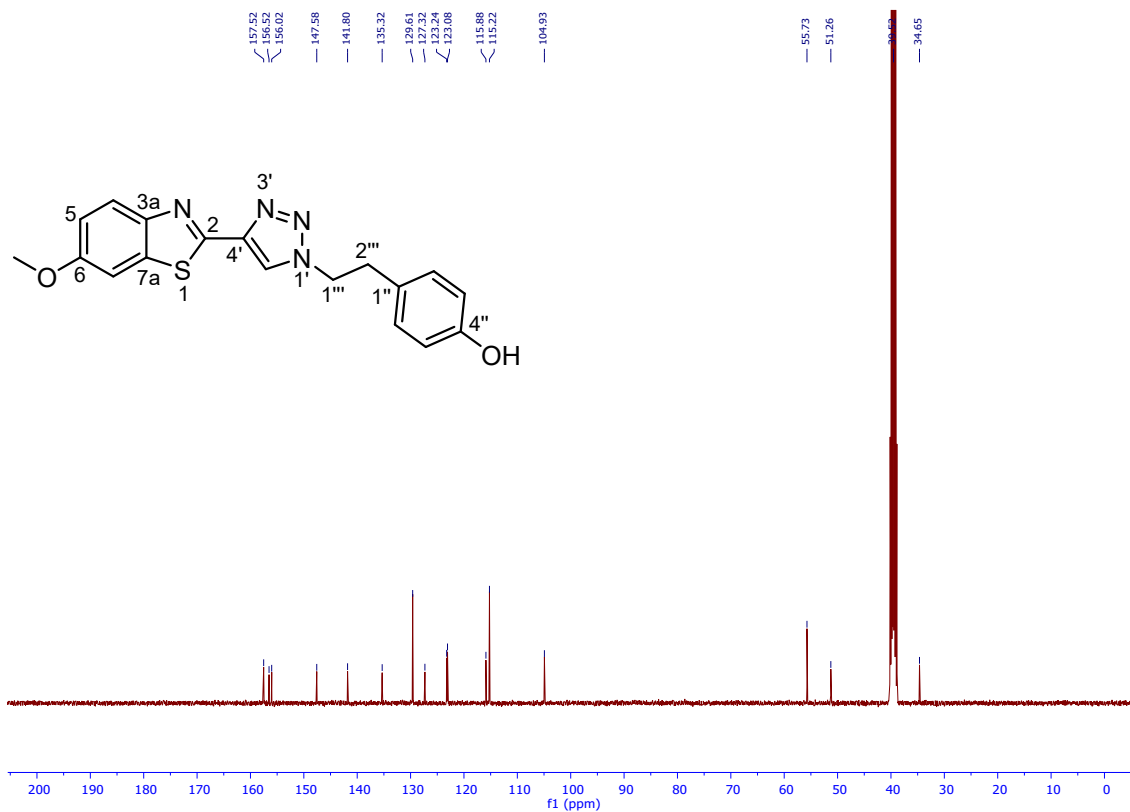

Figure S21. <sup>1</sup>H NMR for 71 (400 MHz, DMSO-*d*<sub>6</sub>)

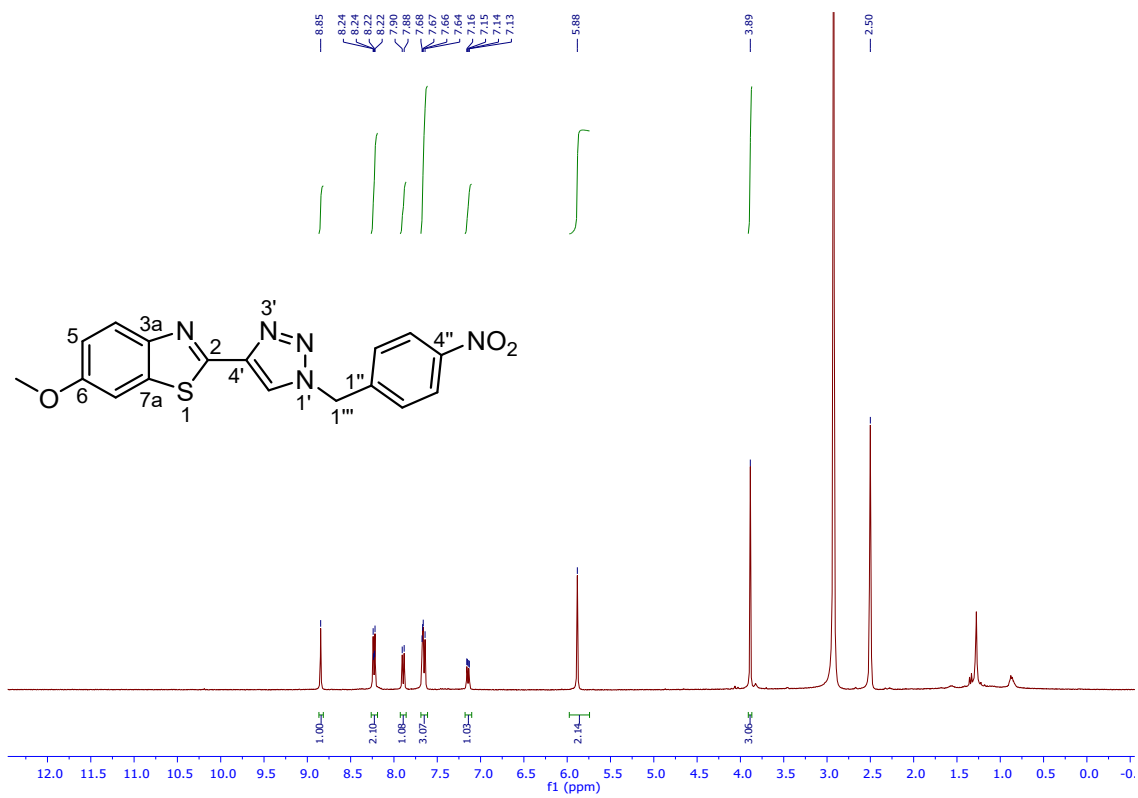



Figure S22.  $^{13}\text{C}$  NMR for **71** (500 MHz,  $\text{DMSO-}d_6$ )

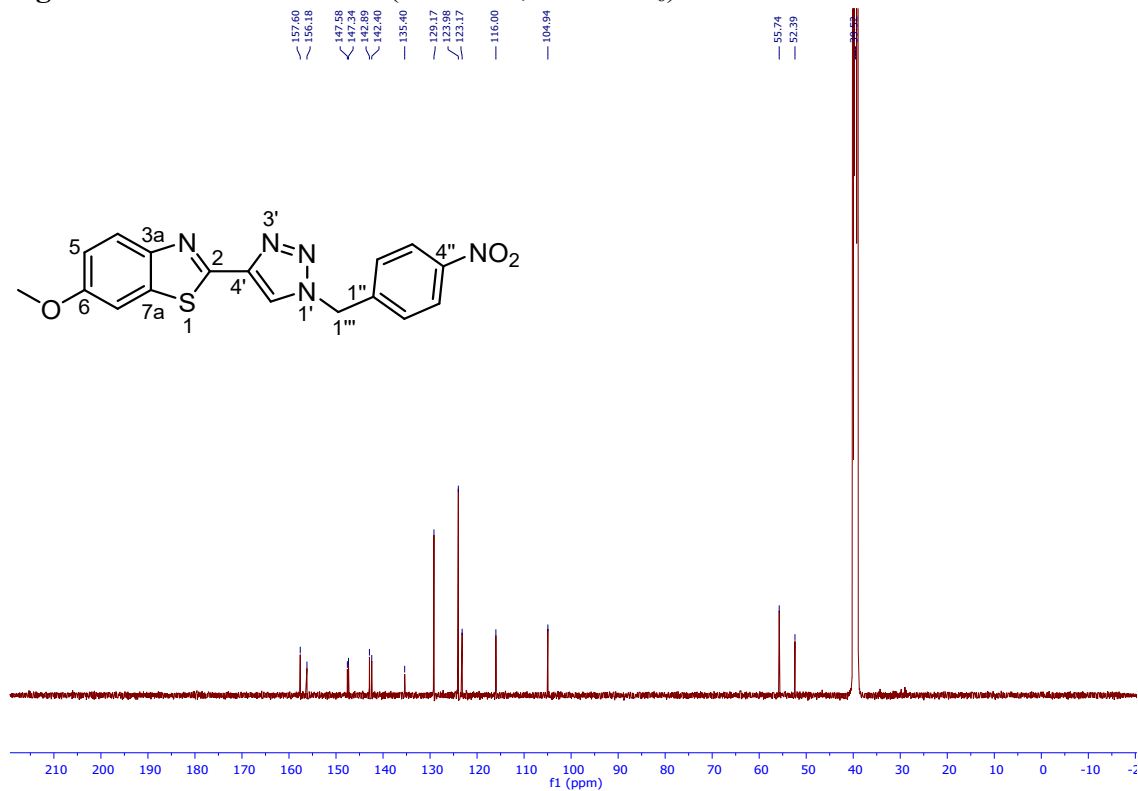

Figure S23.  $^1\text{H}$  NMR for **72** (400 MHz,  $\text{DMSO-}d_6$ )

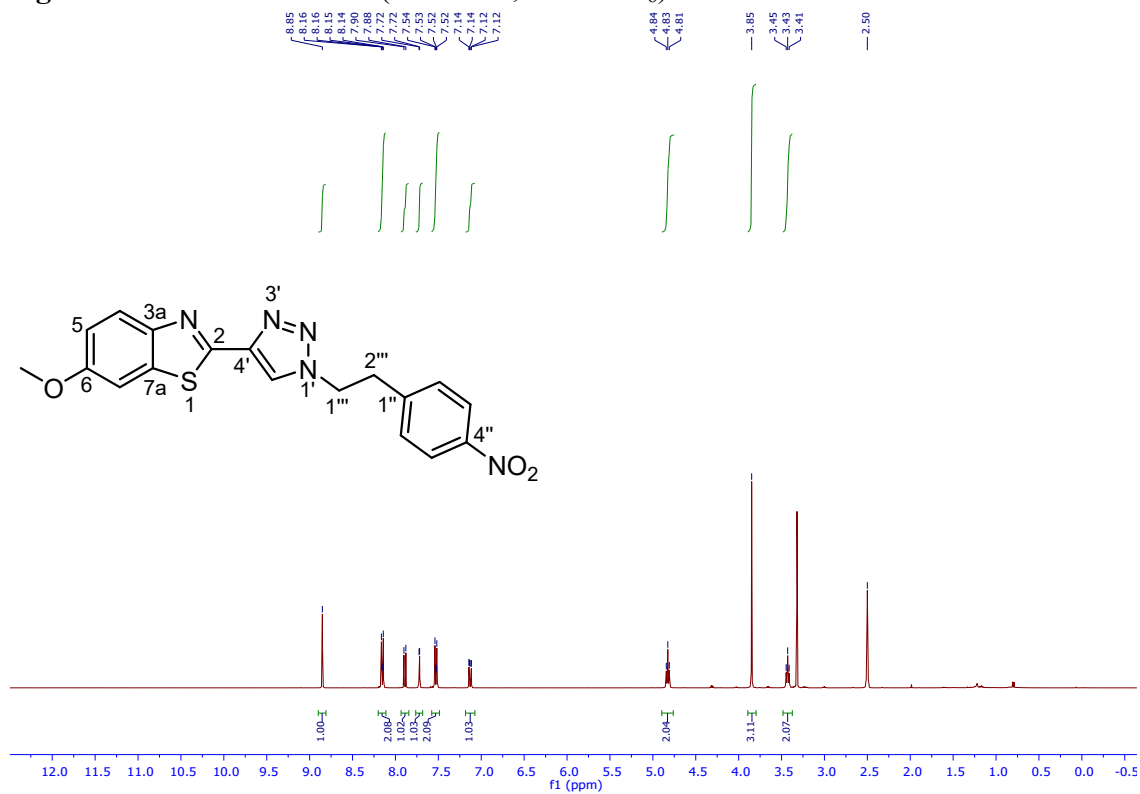

Figure S24.  $^{13}\text{C}$  NMR for **72** (400 MHz,  $\text{DMSO-}d_6$ )

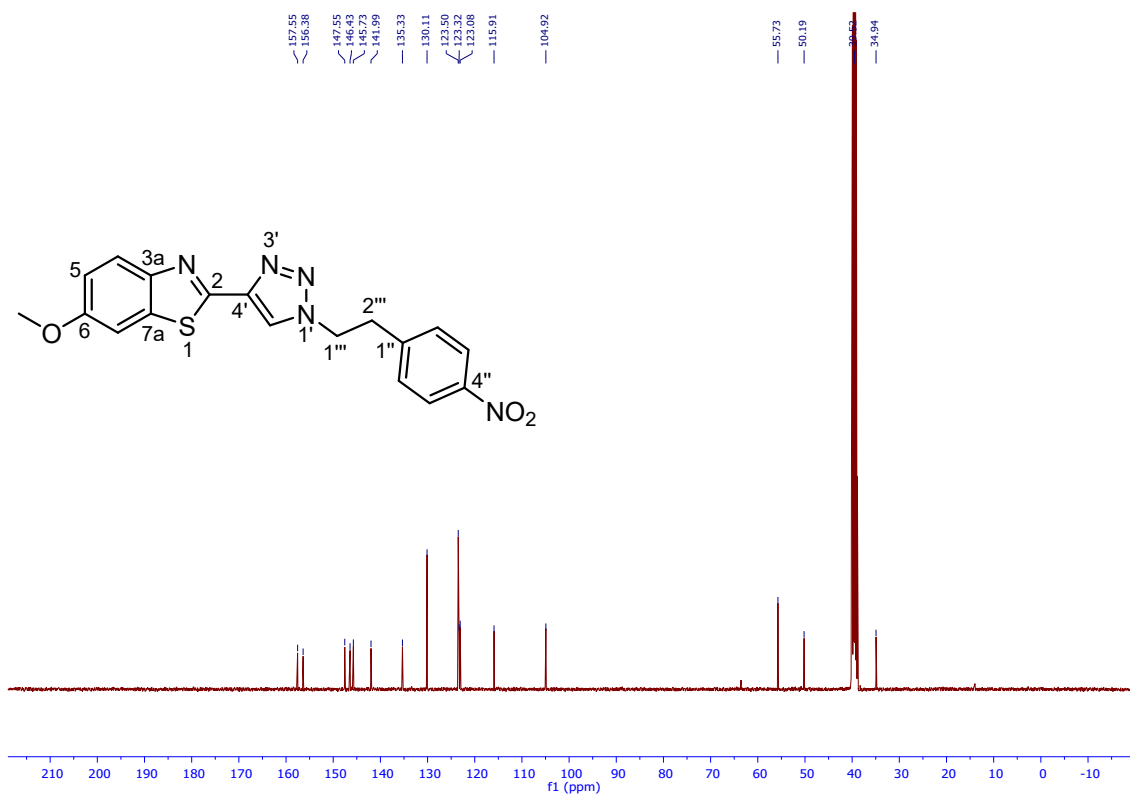

**Figure S25.**  $^1\text{H}$  NMR for **73** (400 MHz,  $\text{DMSO-}d_6$ )

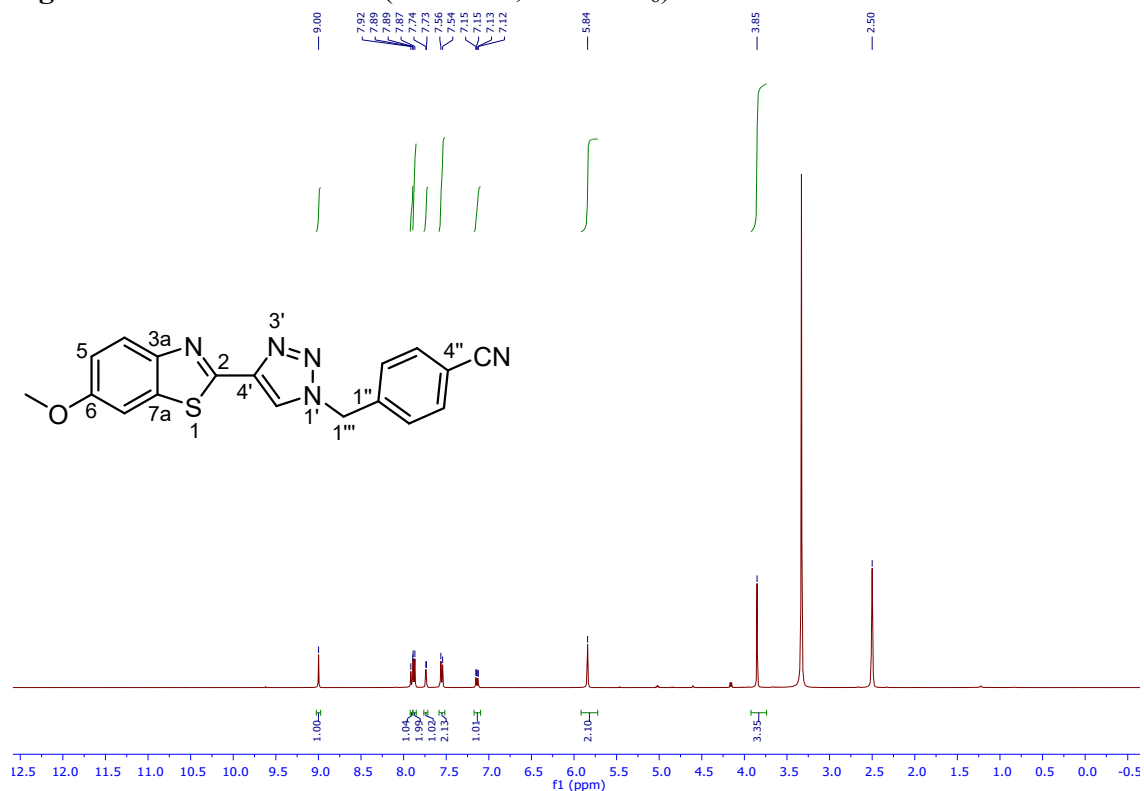

**Figure S26.**  $^{13}\text{C}$  NMR for **73** (400 MHz,  $\text{DMSO-}d_6$ )

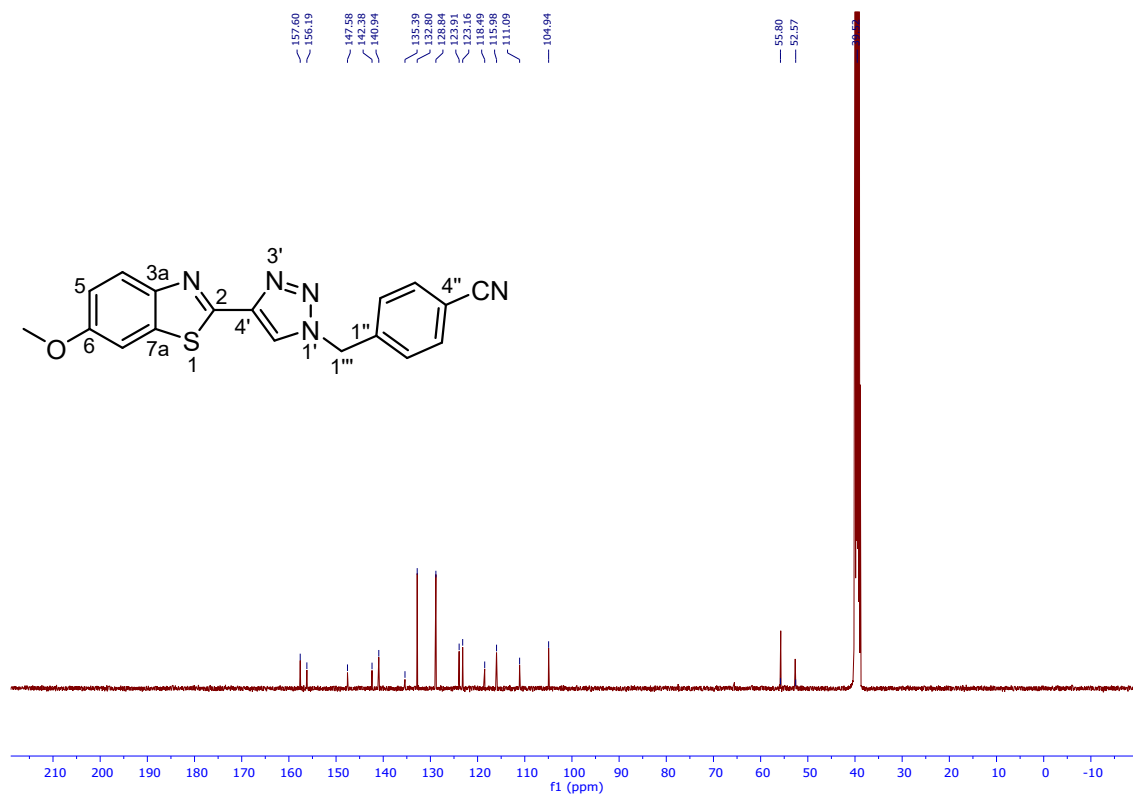

Figure S27.  $^1\text{H}$  NMR for 74 (400 MHz, DMSO- $d_6$ )

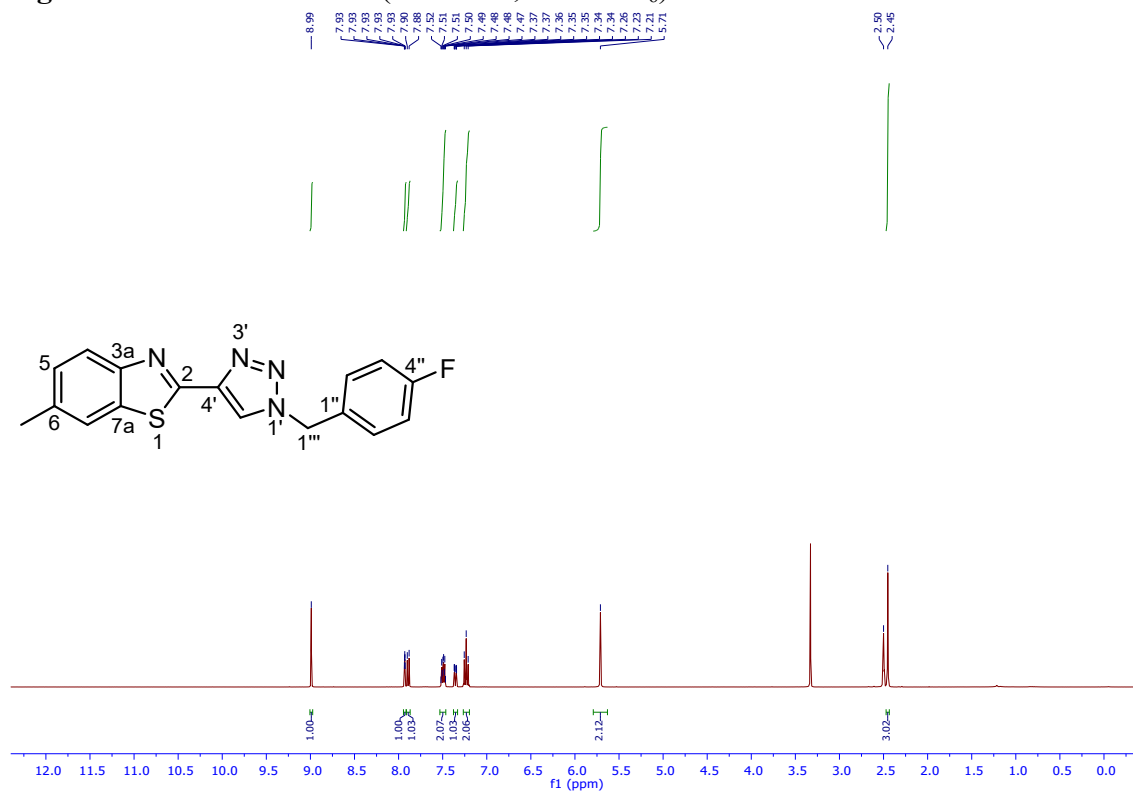

Figure S28.  $^{13}\text{C}$  NMR for 74 (100 MHz, DMSO- $d_6$ )

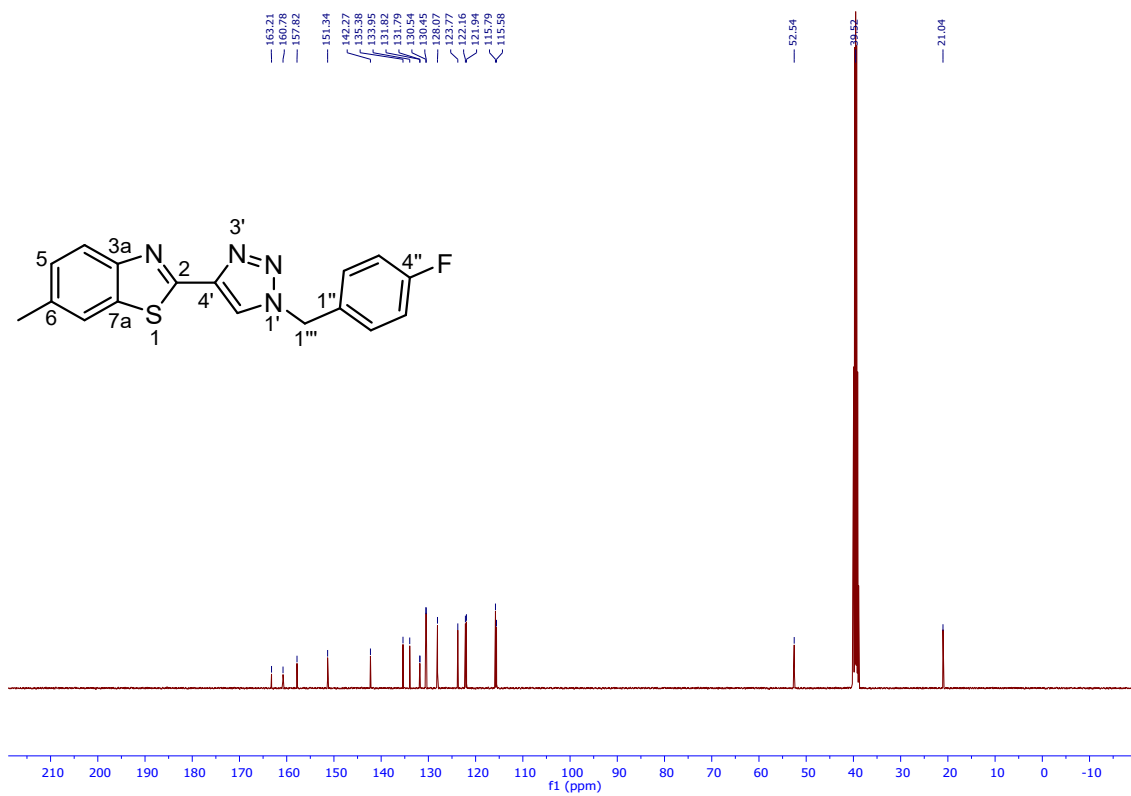

Figure S29. <sup>1</sup>H NMR for 75 (400 MHz, DMSO-*d*<sub>6</sub>)

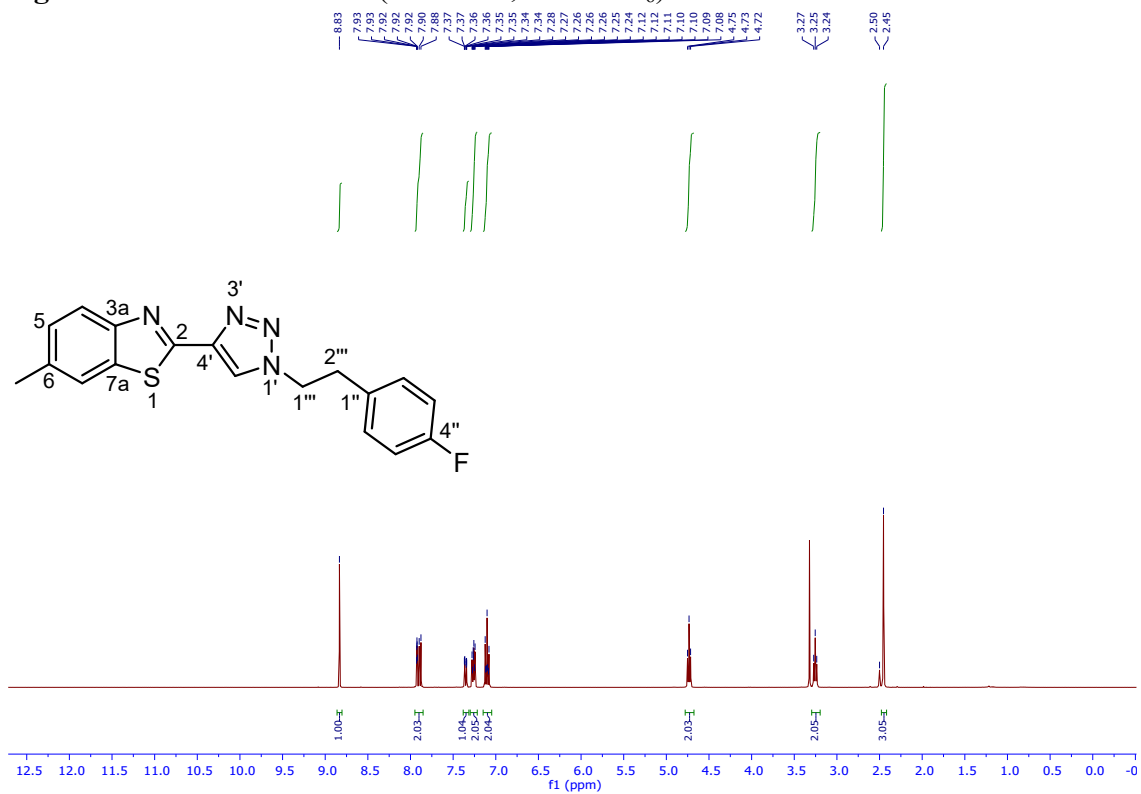

Figure S30. <sup>13</sup>C NMR for 75 (100 MHz, DMSO-*d*<sub>6</sub>)

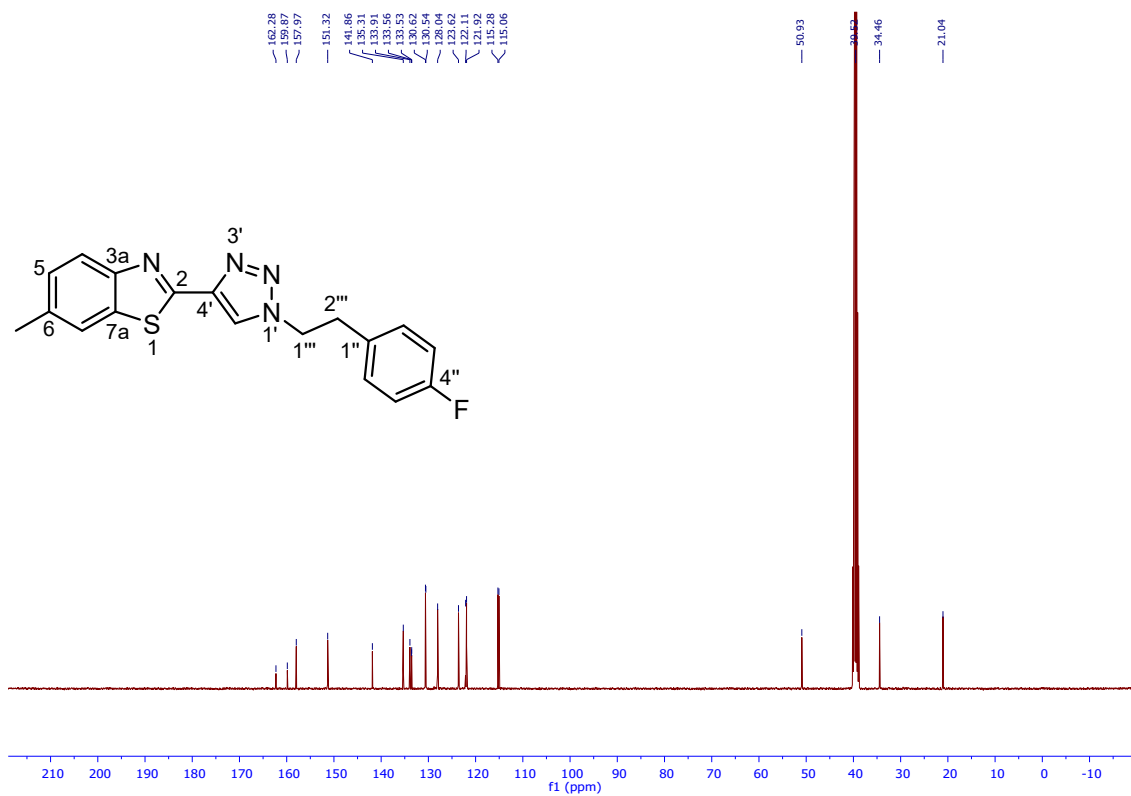

Figure S31. <sup>1</sup>H NMR for **76** (400 MHz, DMSO-*d*<sub>6</sub>)

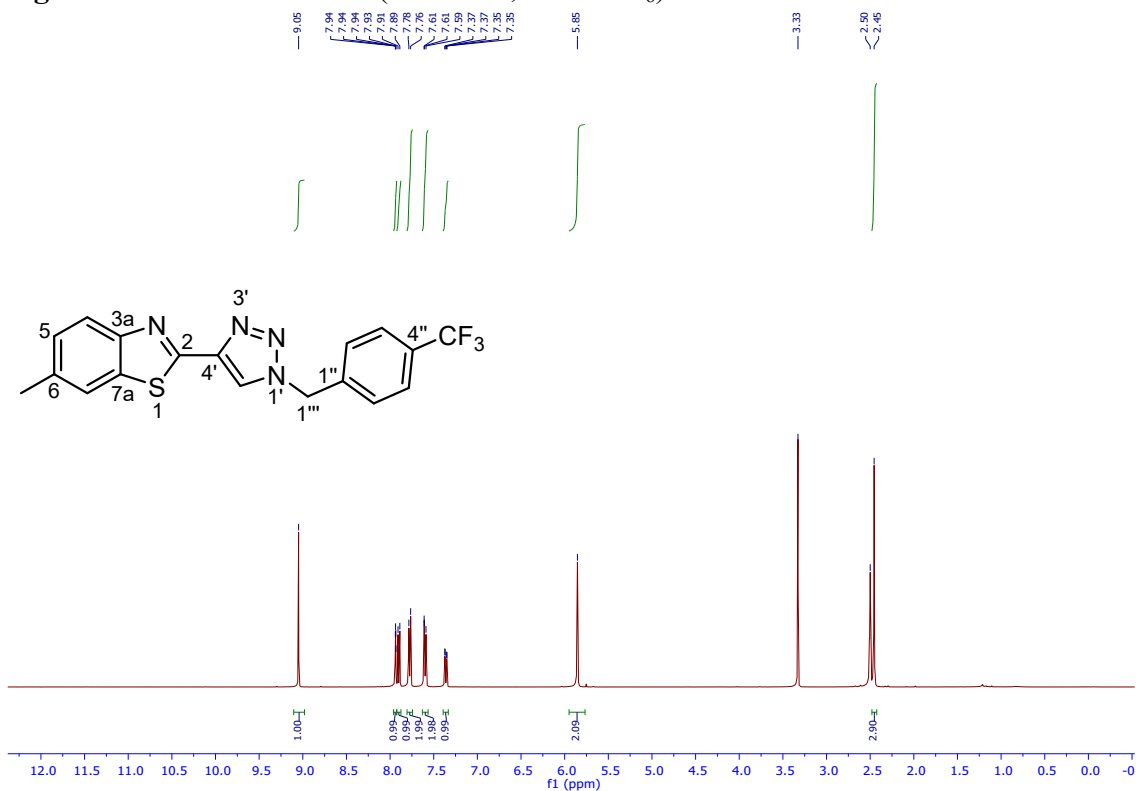

Figure S32. <sup>13</sup>C NMR for **76** (100 MHz, DMSO-*d*<sub>6</sub>)

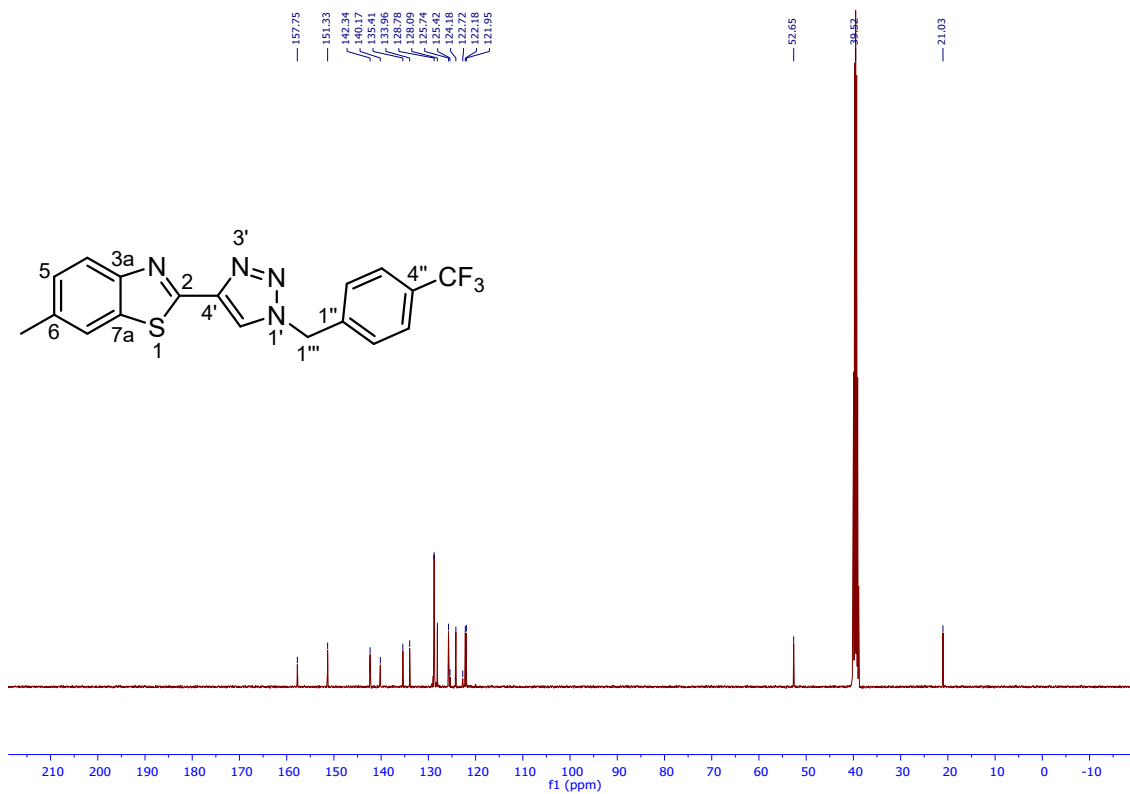

**Figure S33.** <sup>1</sup>H NMR for 77 (400 MHz, DMSO-*d*<sub>6</sub>)

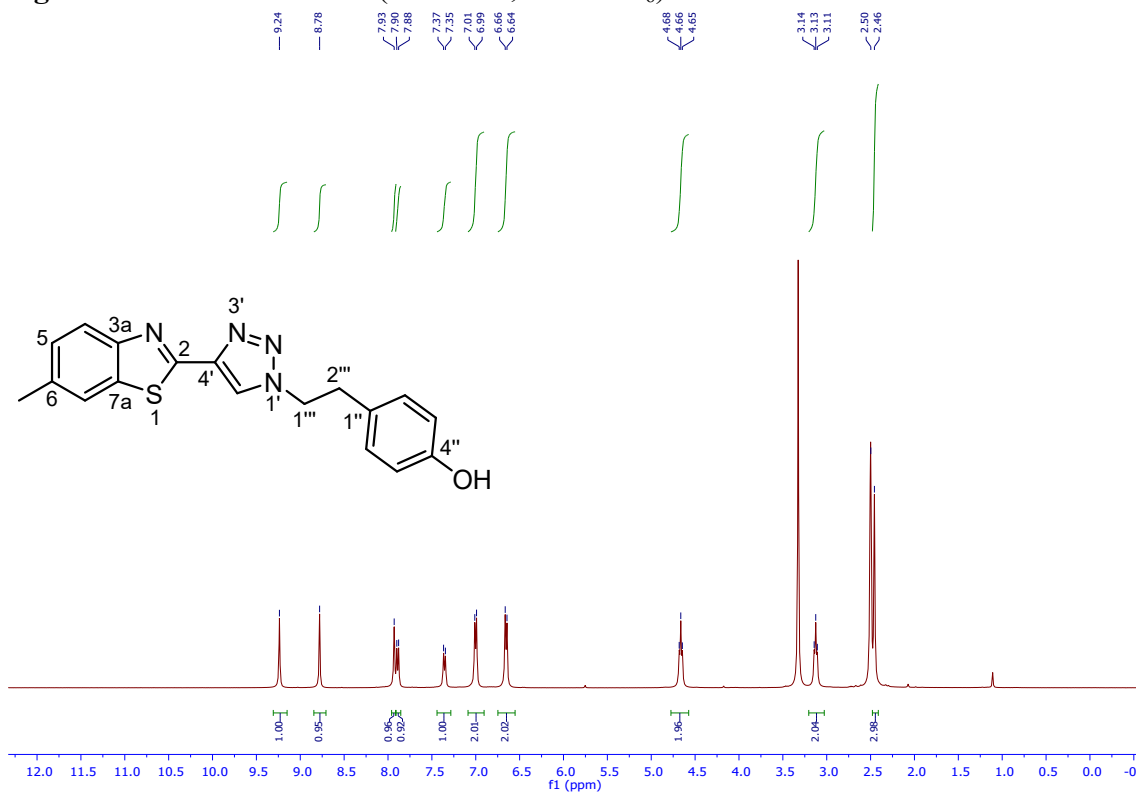

**Figure S34.** <sup>13</sup>C NMR for 77 (400 MHz, DMSO-*d*<sub>6</sub>)

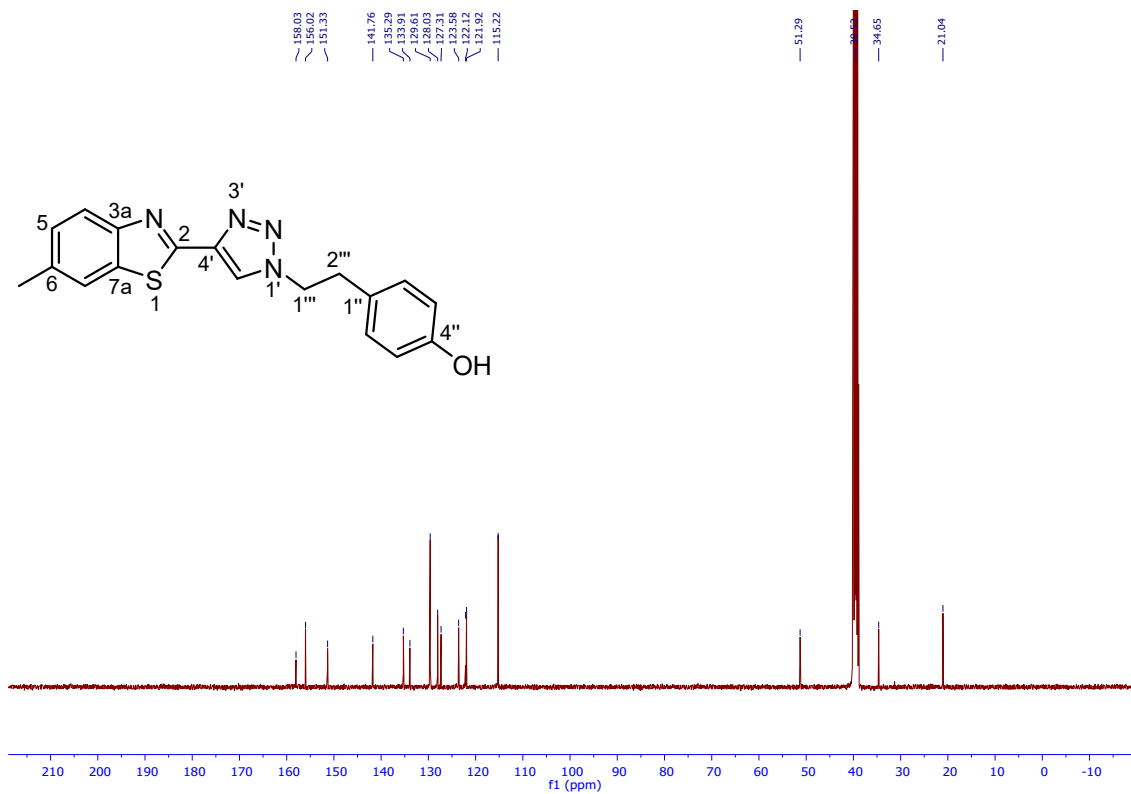

Figure S35. <sup>1</sup>H NMR for 78 (500 MHz, DMSO-*d*<sub>6</sub>)

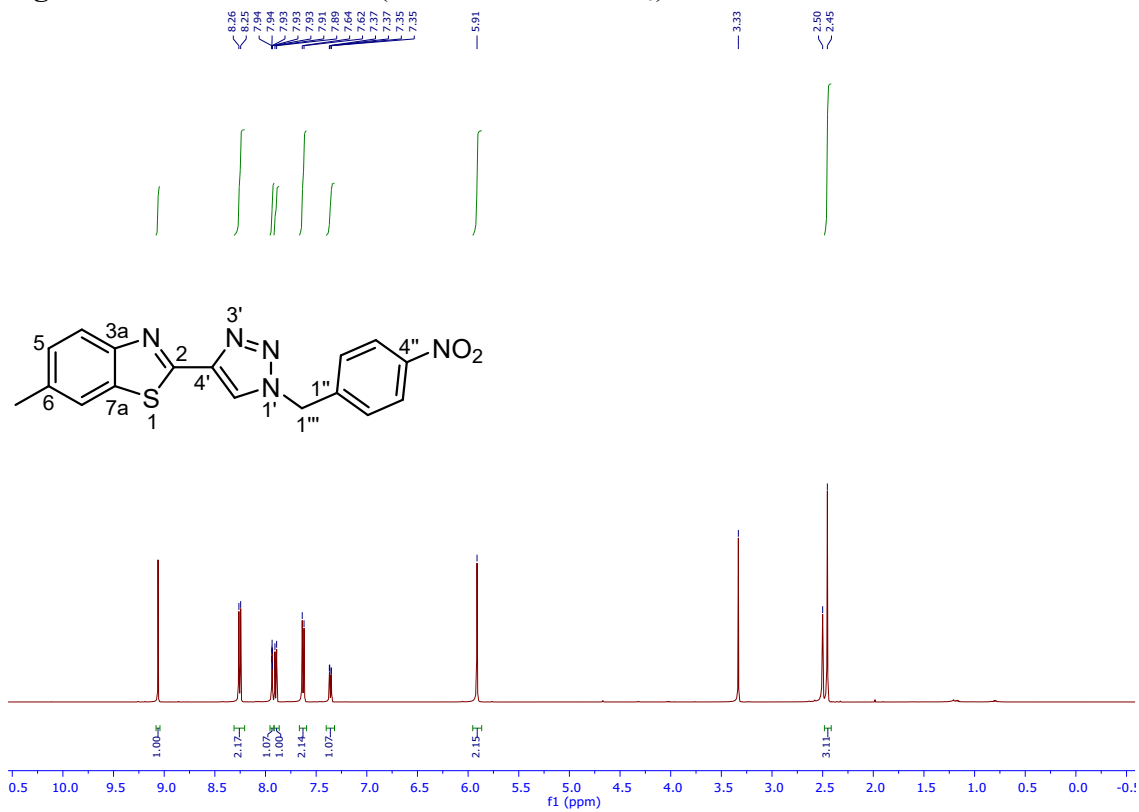

Figure S36.  $^{13}\text{C}$  NMR for **78** (500 MHz,  $\text{DMSO-}d_6$ )

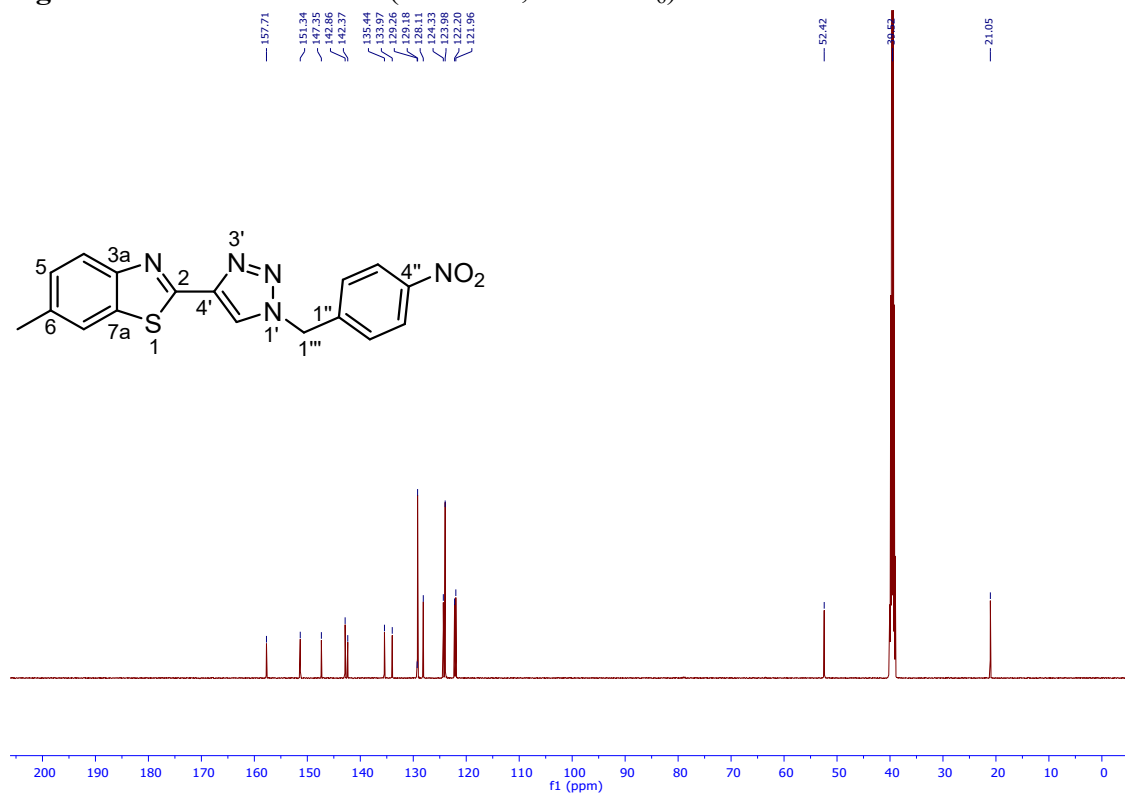

Figure S37.  $^1\text{H}$  NMR for **89** (400 MHz,  $\text{DMSO-}d_6$ )

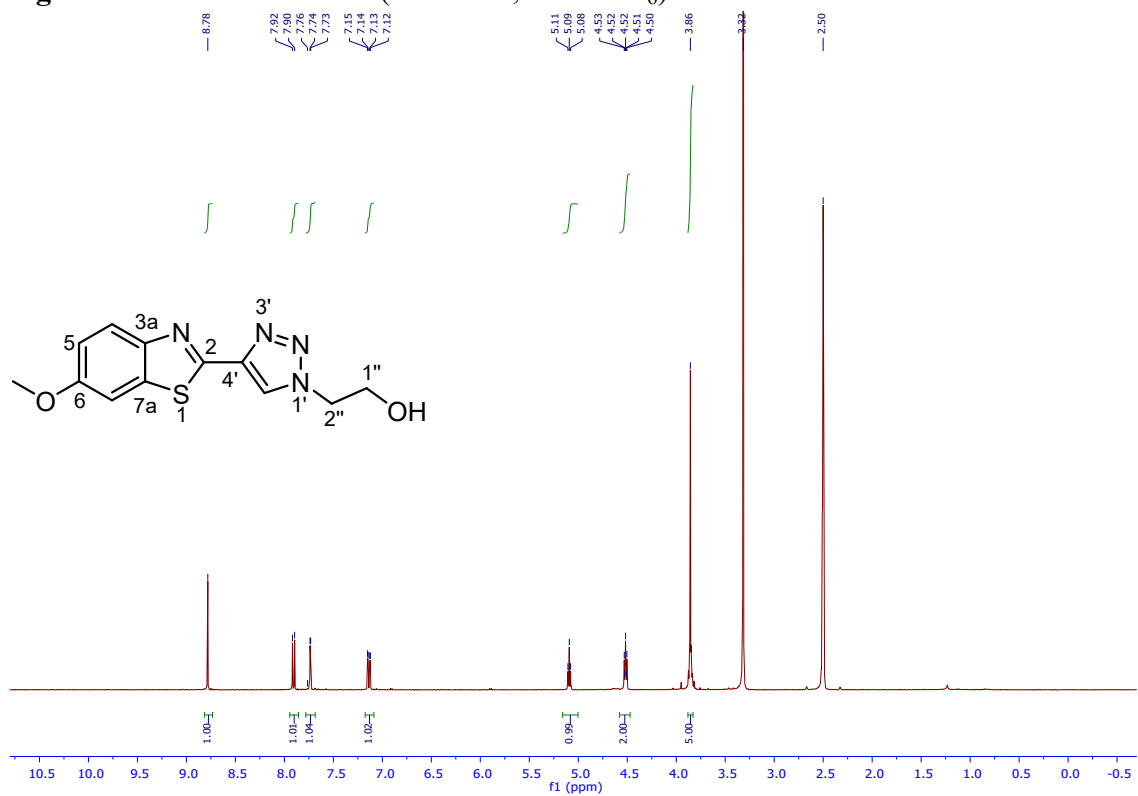



Figure S38.  $^{13}\text{C}$  NMR for **89** (400 MHz,  $\text{DMSO-}d_6$ )

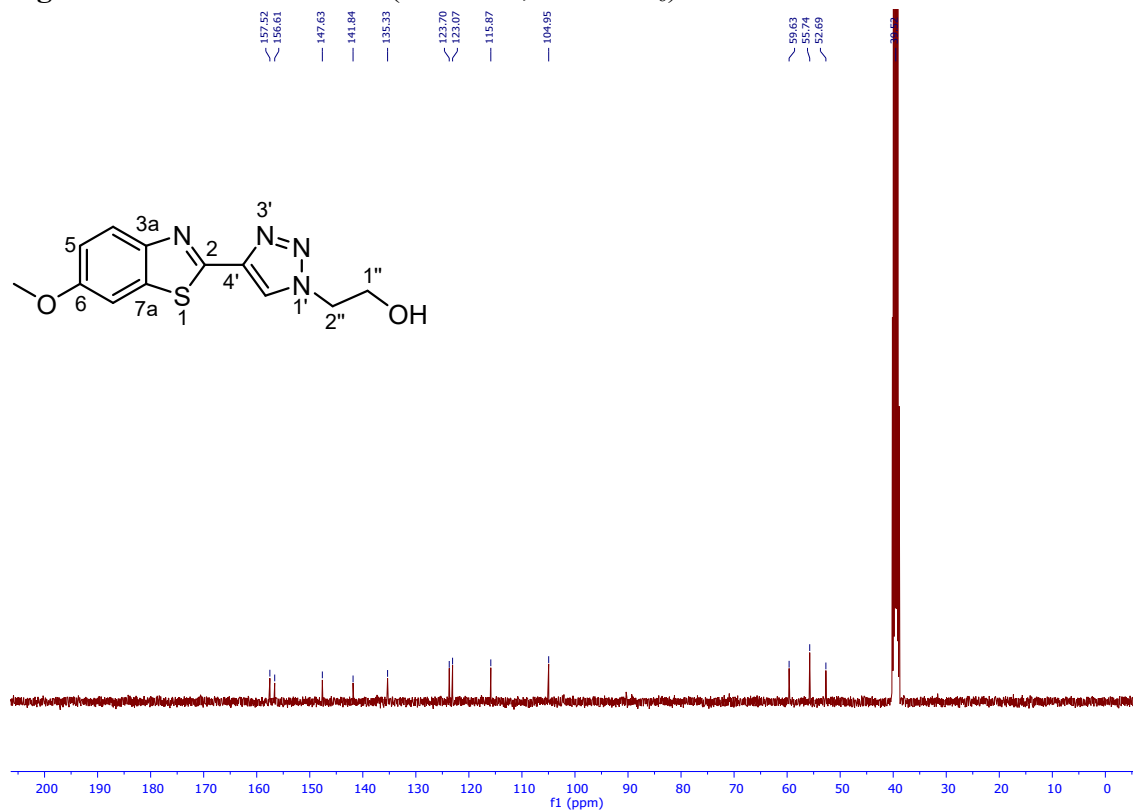

Figure S39.  $^1\text{H}$  NMR for **90** (400 MHz,  $\text{DMSO-}d_6$ )

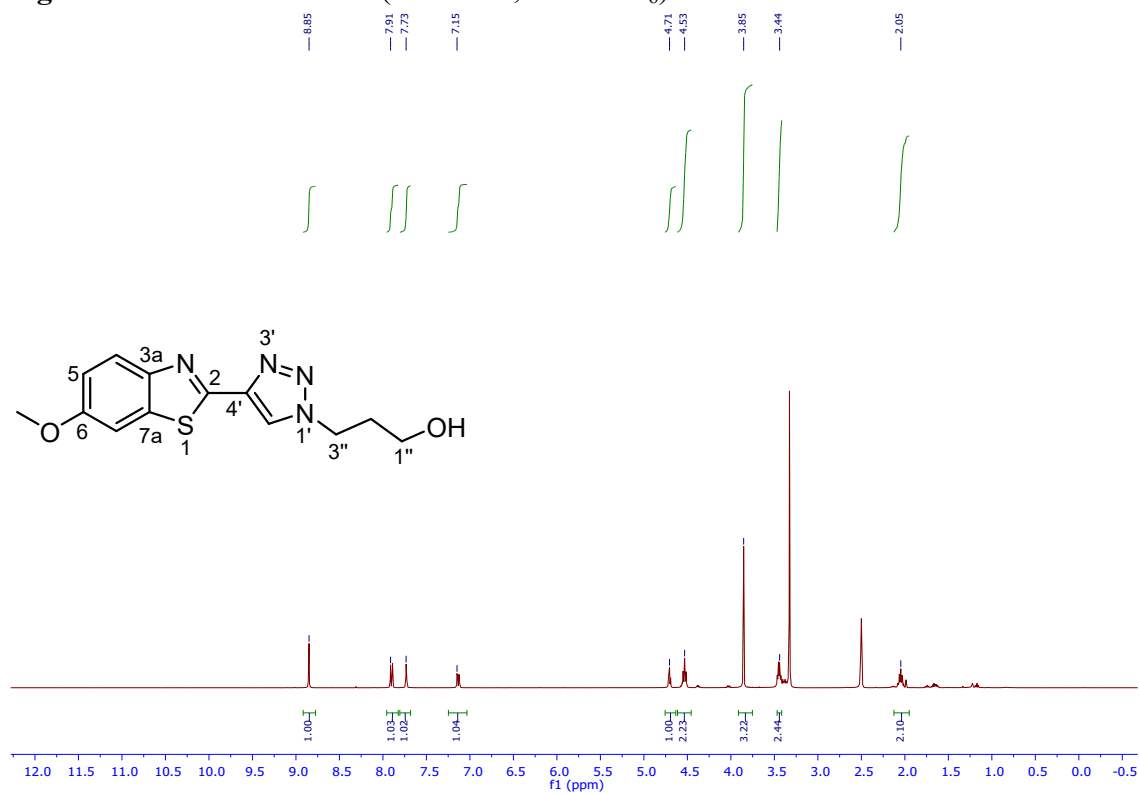

Figure S40. <sup>13</sup>C NMR for **90** (400 MHz, DMSO-*d*<sub>6</sub>)

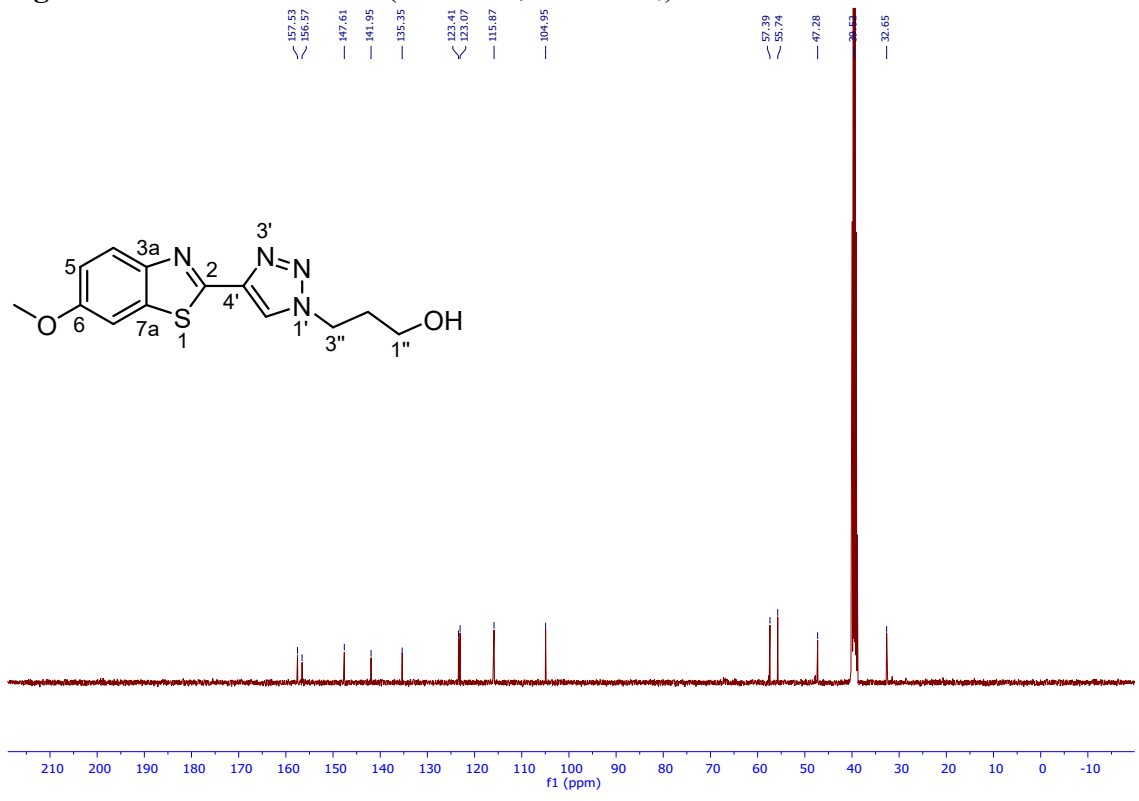

Figure S41. <sup>1</sup>H NMR for **91** (400 MHz, DMSO-*d*<sub>6</sub>)

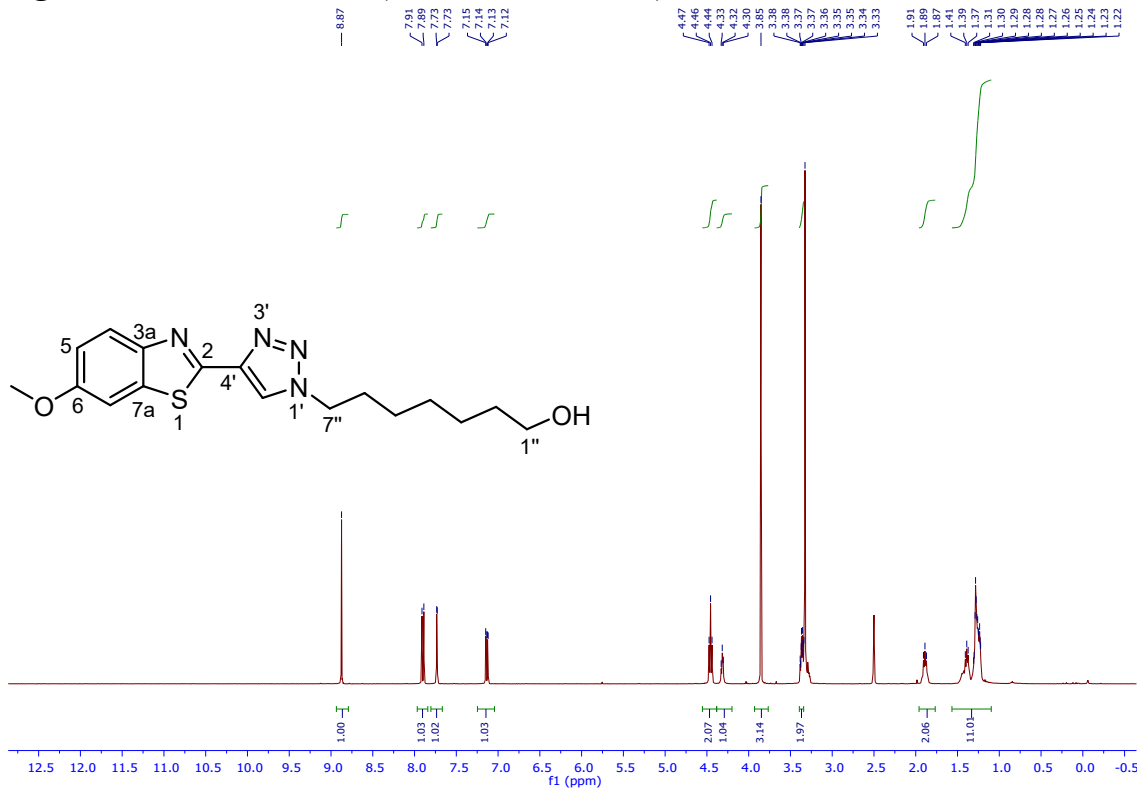

Figure S42.  $^{13}\text{C}$  NMR for **91** (400 MHz,  $\text{DMSO-}d_6$ )

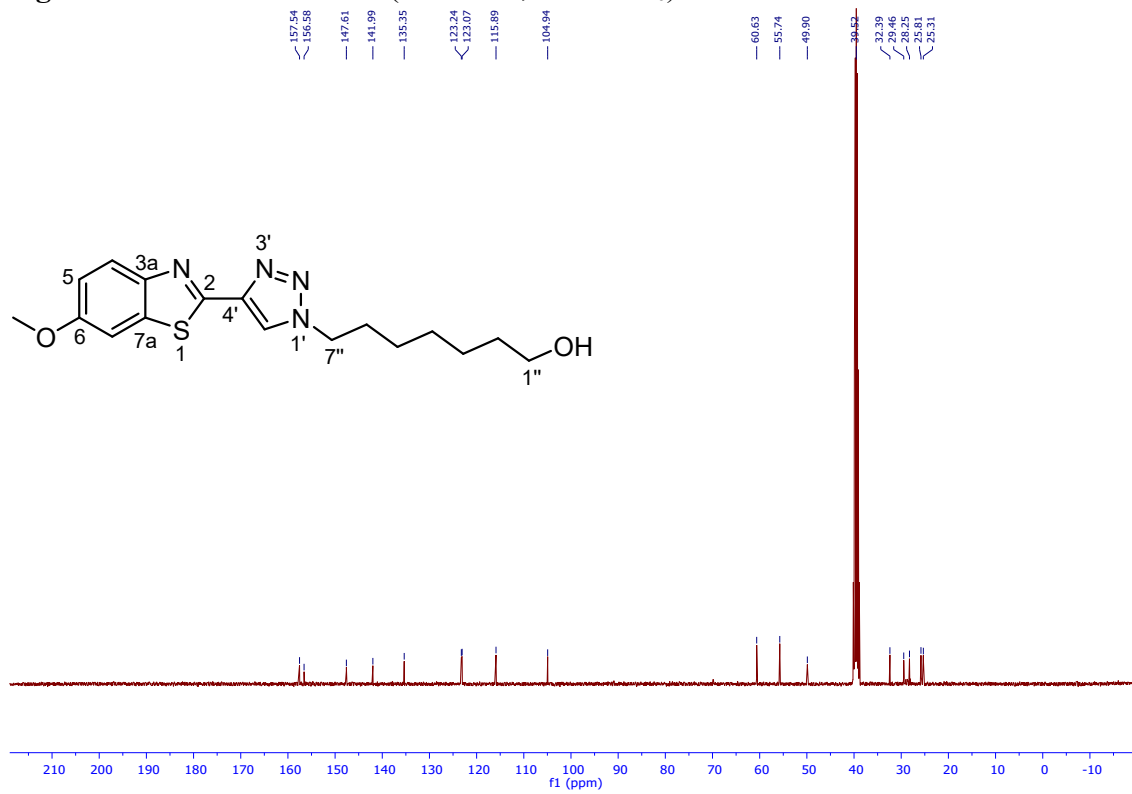

Figure S43.  $^1\text{H}$  NMR for **92** (400 MHz,  $\text{DMSO-}d_6$ )

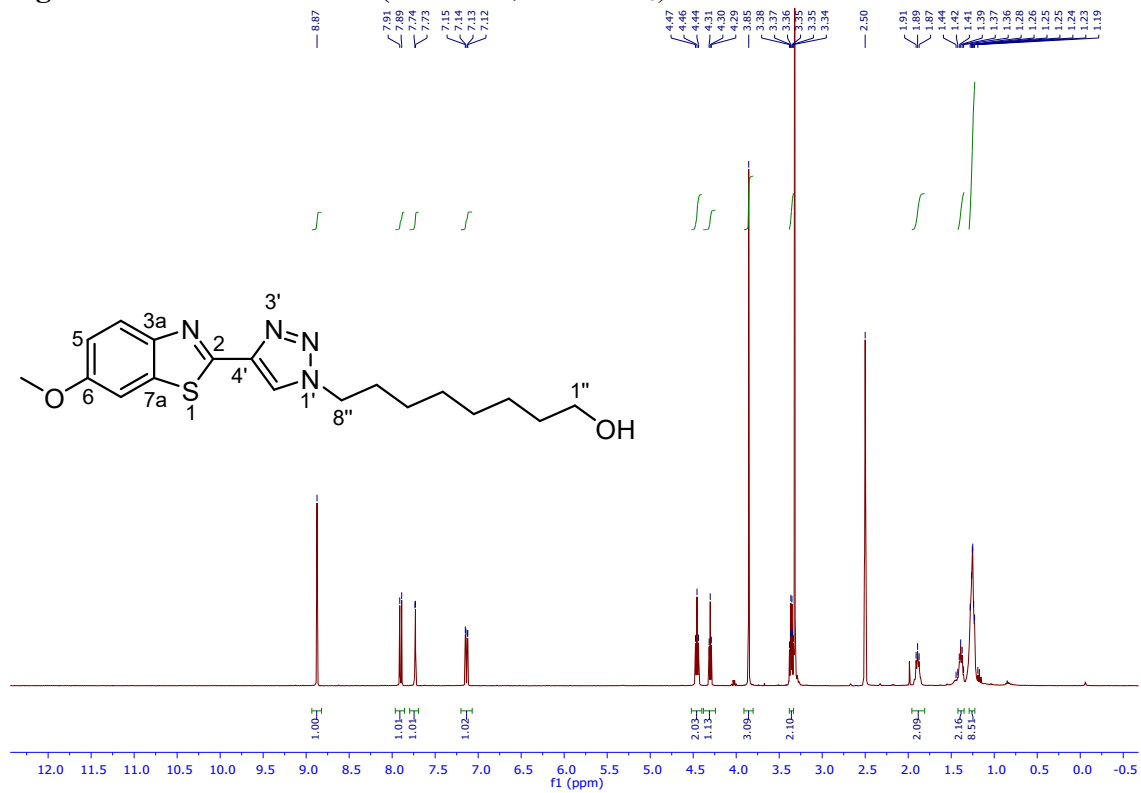

Figure S44.  $^{13}\text{C}$  NMR for **92** (400 MHz,  $\text{DMSO-}d_6$ )

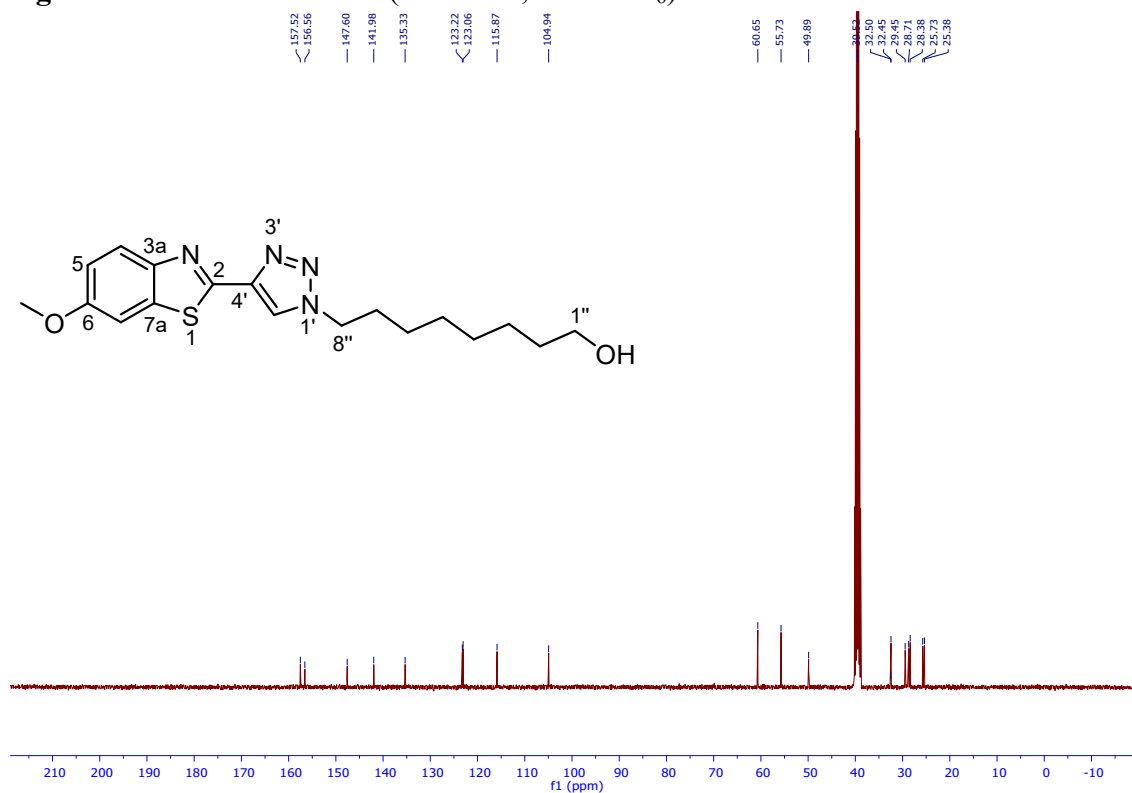

Figure S45.  $^1\text{H}$  NMR for **93** (400 MHz,  $\text{CDCl}_3$ )

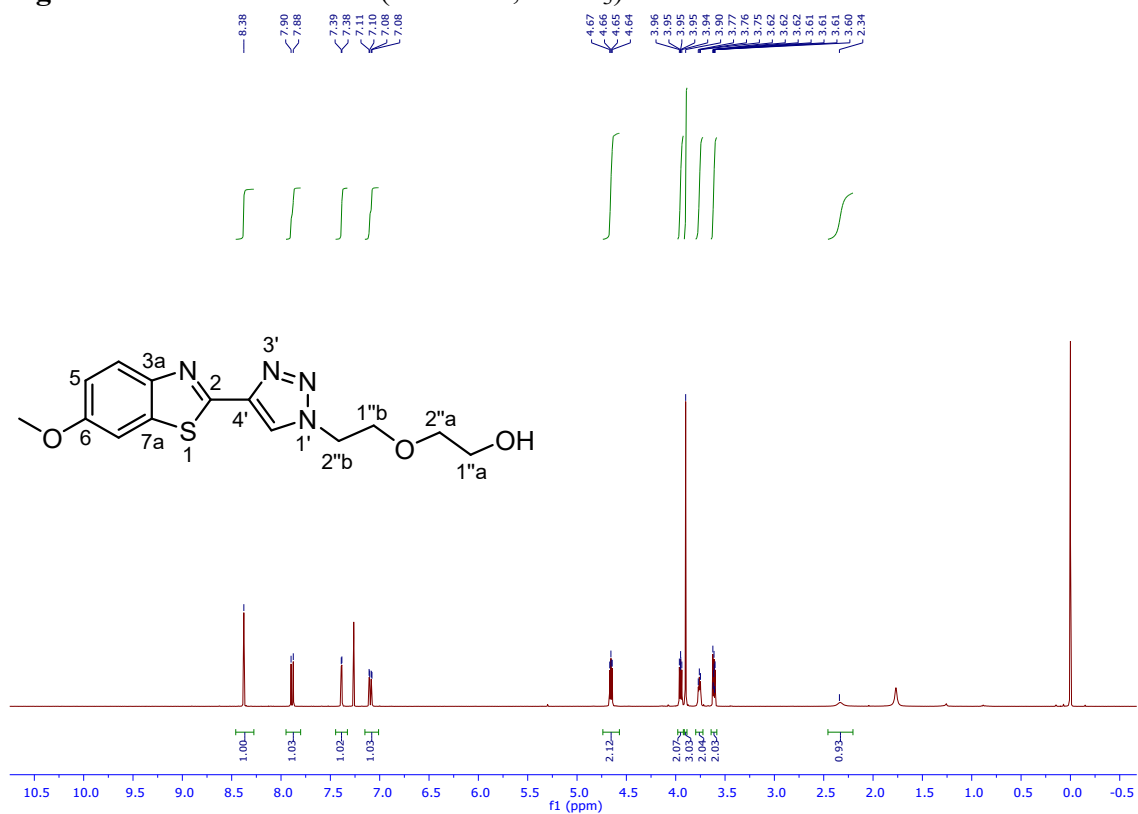

Figure S46.  $^{13}\text{C}$  NMR for **93** (400 MHz,  $\text{CDCl}_3$ )

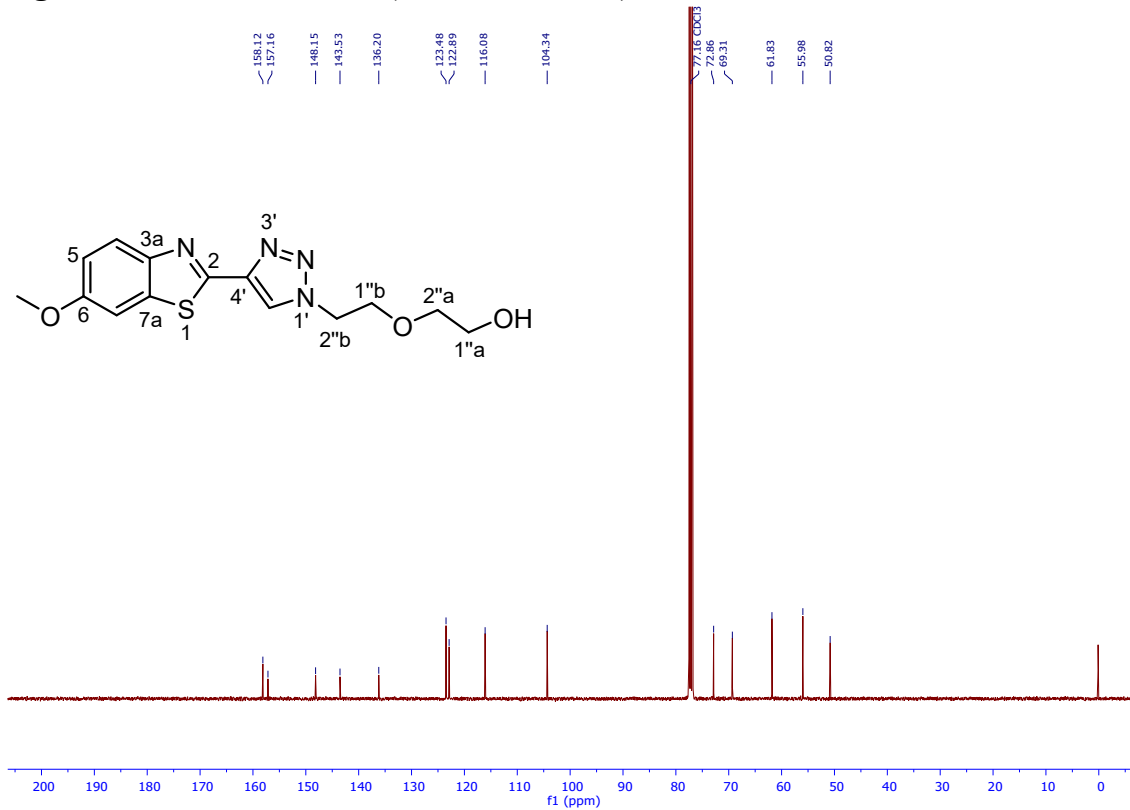

Figure S47.  $^1\text{H}$  NMR for **109** (400 MHz,  $\text{DMSO}-d_6$ )

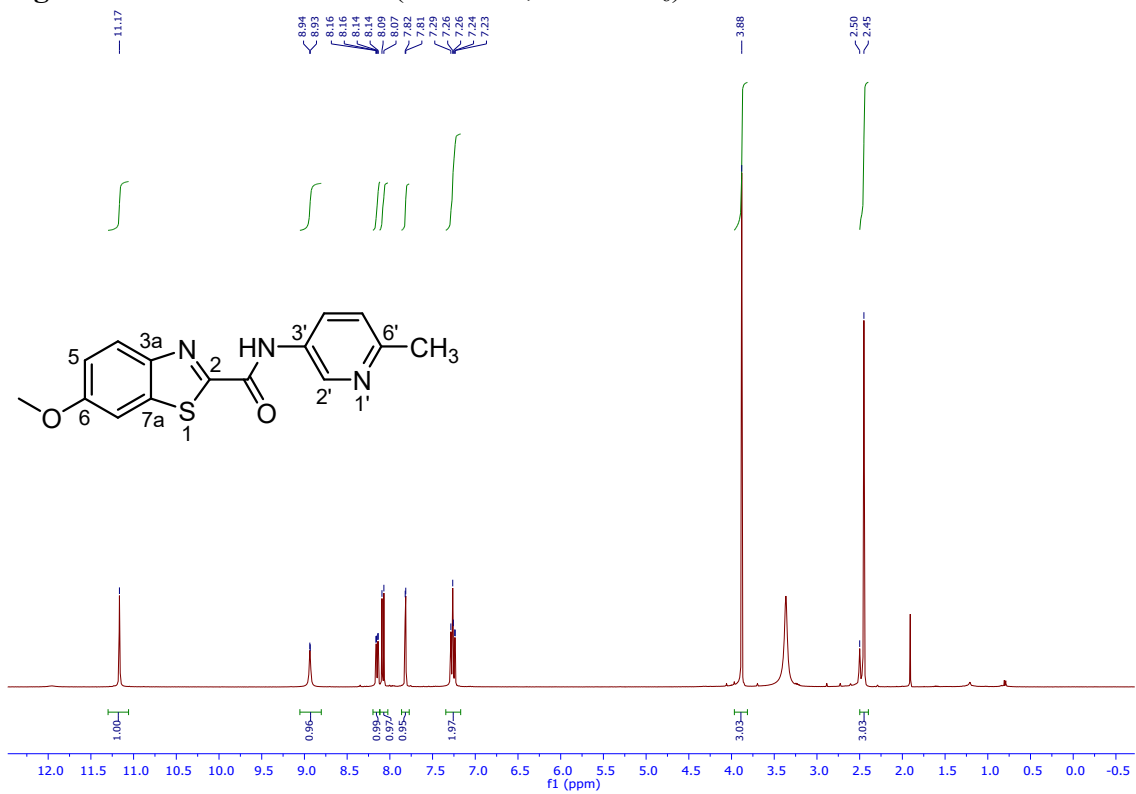

Figure S48.  $^{13}\text{C}$  NMR for **109** (400 MHz,  $\text{DMSO-}d_6$ )

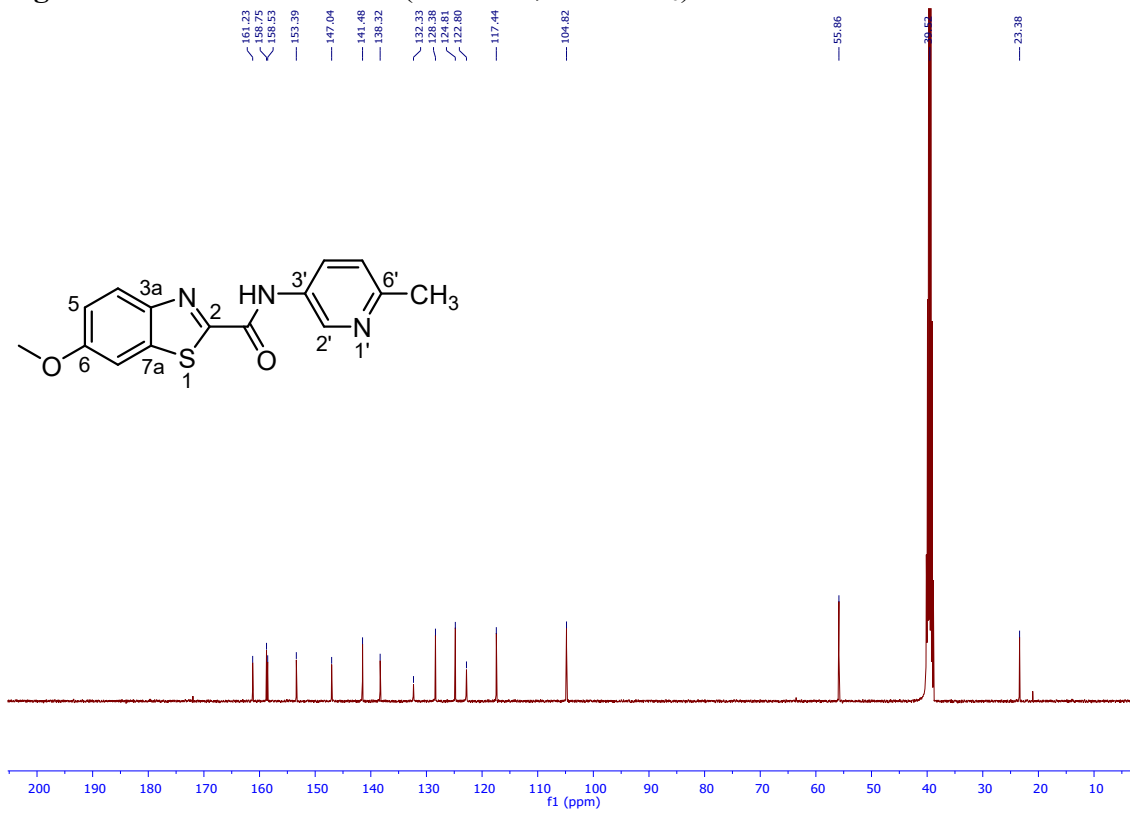

Figure S49.  $^1\text{H}$  NMR for **110** (500 MHz,  $\text{DMSO-}d_6$ )

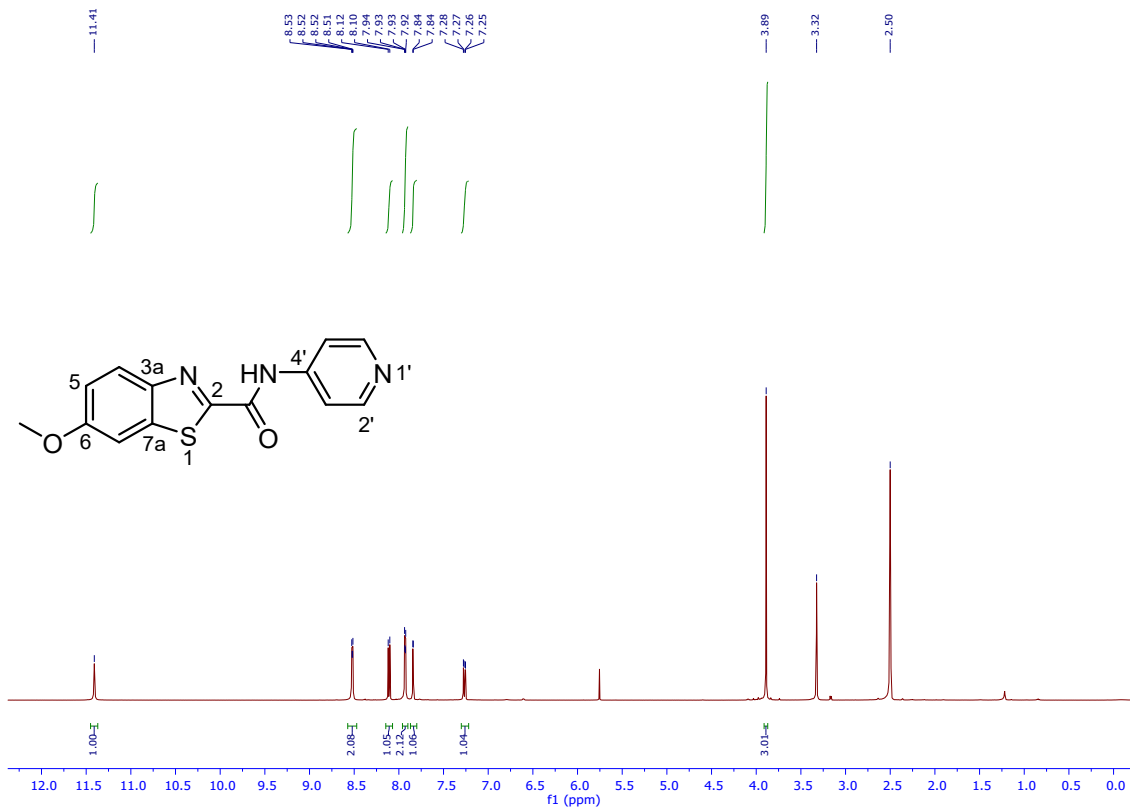

Figure S50. <sup>13</sup>C NMR for **110** (500 MHz, DMSO-*d*<sub>6</sub>)

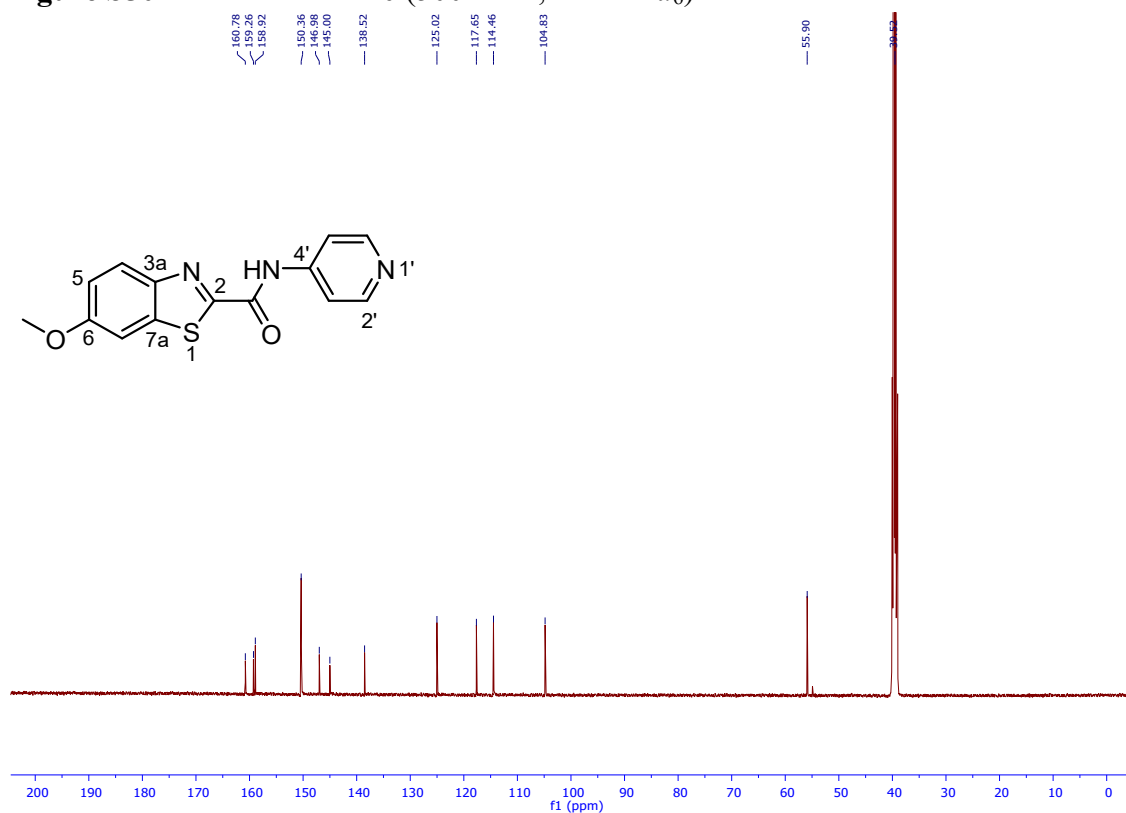

Figure S51. <sup>1</sup>H NMR for **111** (500 MHz, CDCl<sub>3</sub>)

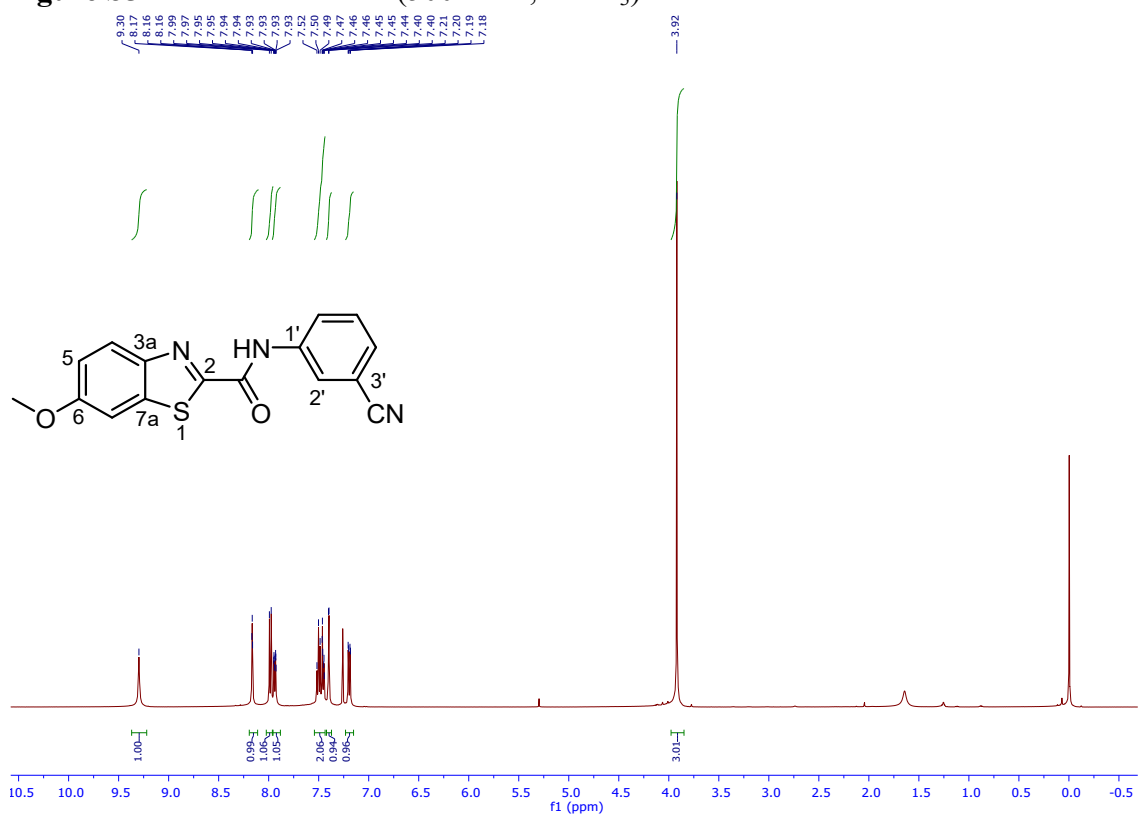

Figure S52.  $^{13}\text{C}$  NMR for **111** (500 MHz,  $\text{CDCl}_3$ )

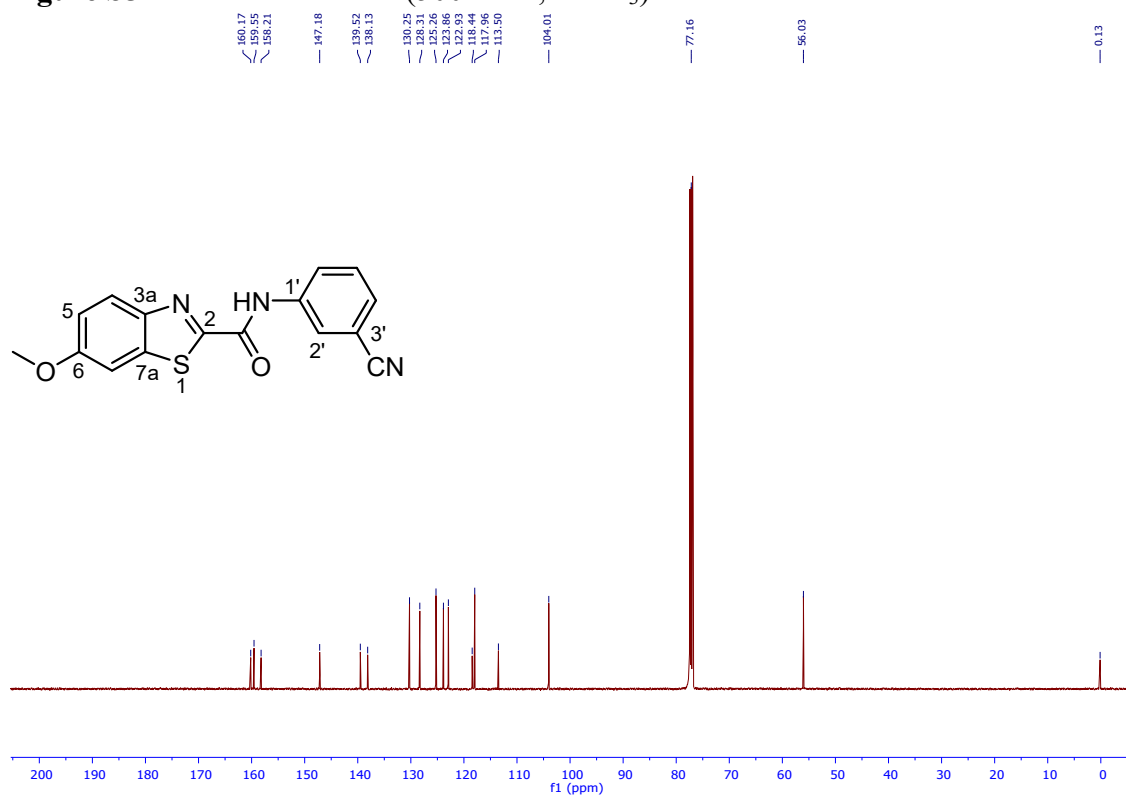

Figure S53.  $^1\text{H}$  NMR for **112** (500 MHz,  $\text{DMSO-}d_6$ )

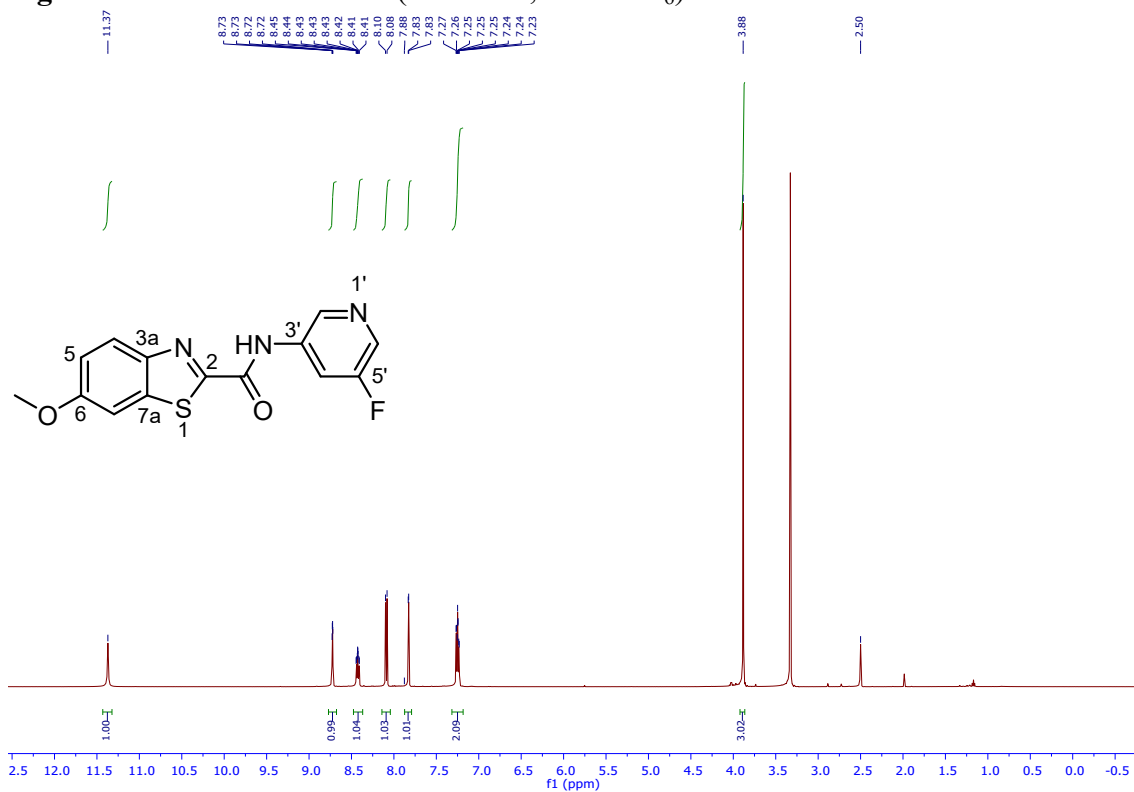



Figure S54.  $^{13}\text{C}$  NMR for **112** (125 MHz,  $\text{DMSO-}d_6$ )

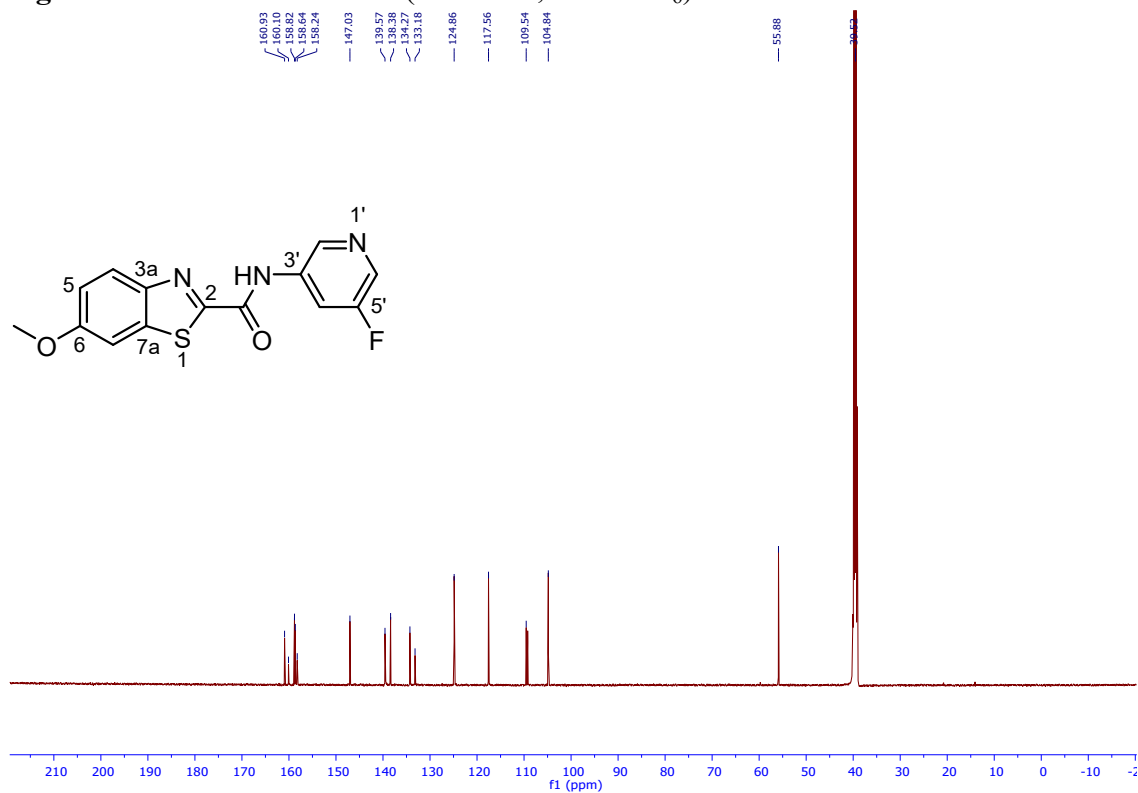

Figure S55.  $^1\text{H}$  NMR for **113** (500 MHz,  $\text{DMSO-}d_6$ )

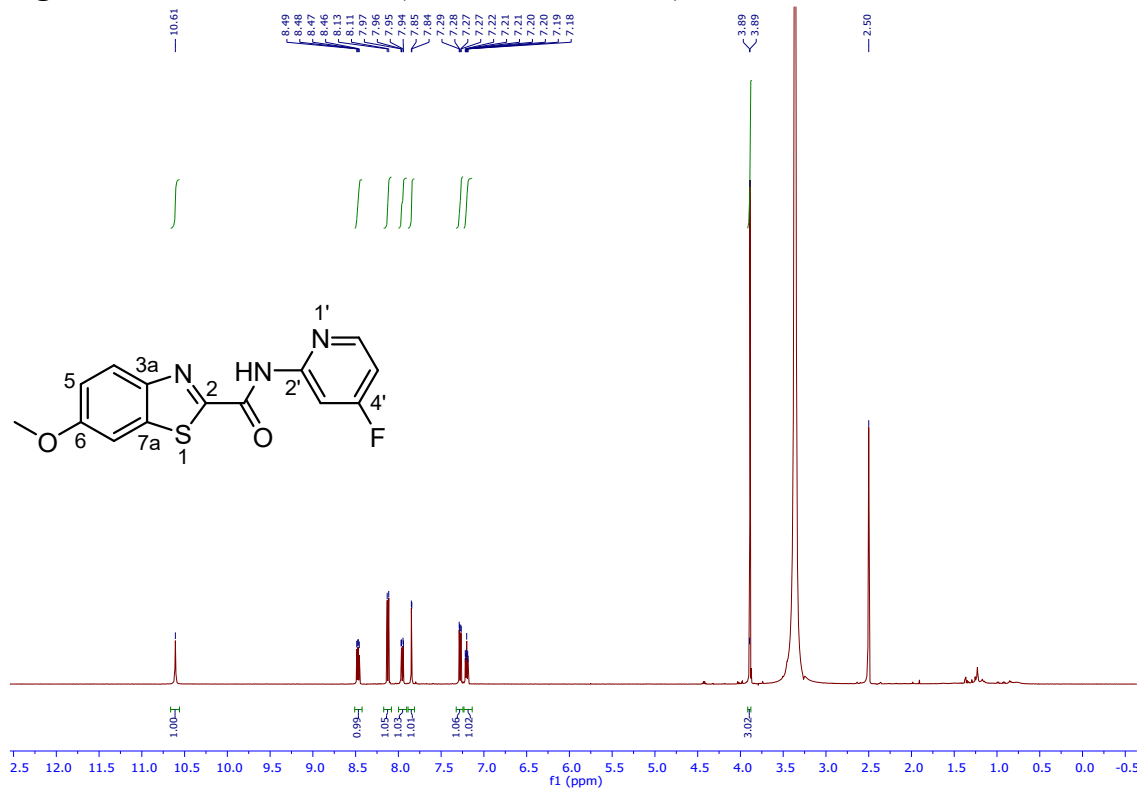

Figure S56.  $^{13}\text{C}$  NMR for **113** (125 MHz,  $\text{DMSO-}d_6$ )

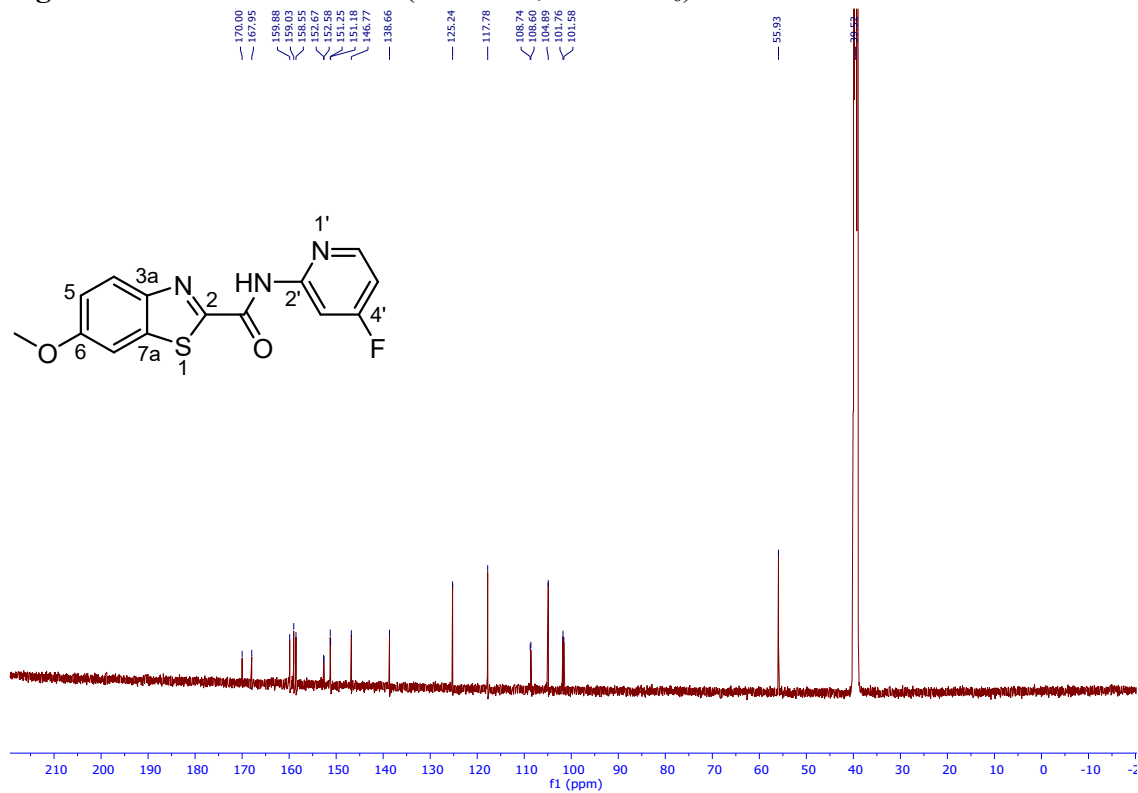

Figure S57.  $^1\text{H}$  NMR for **114** (500 MHz,  $\text{DMSO-}d_6$ )

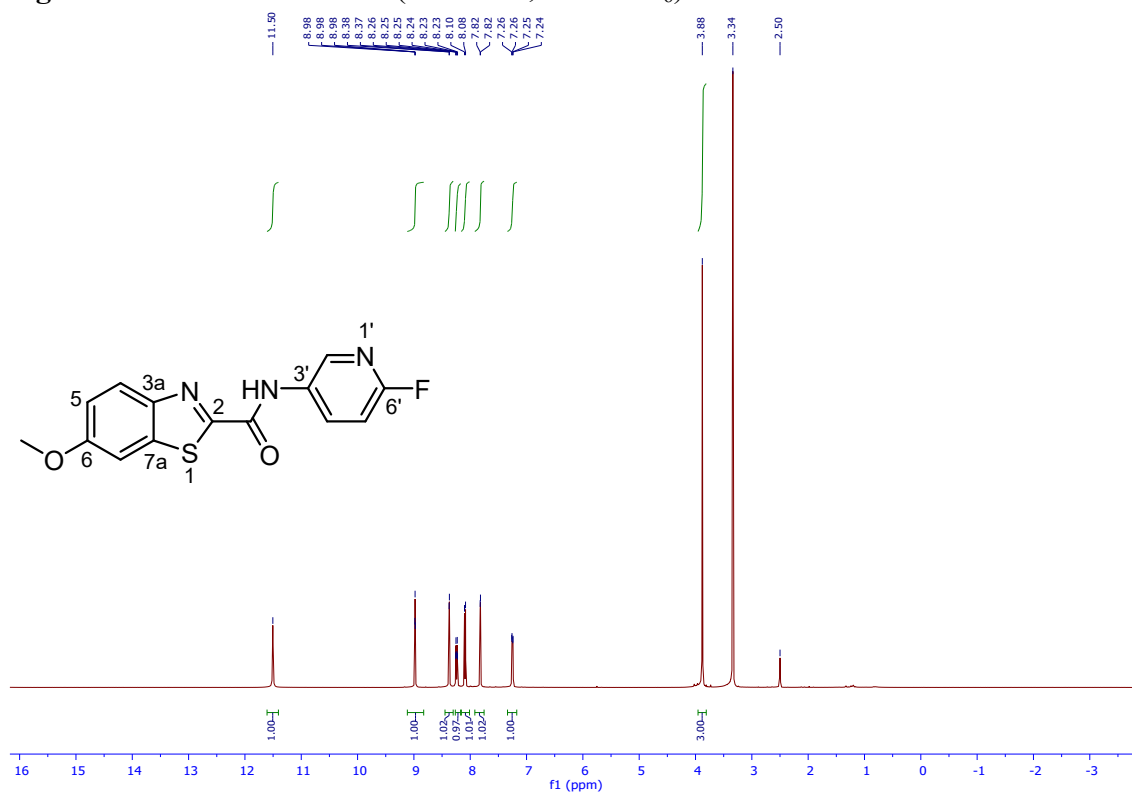

Figure S58.  $^{13}\text{C}$  NMR for **114** (125 MHz,  $\text{DMSO-}d_6$ )

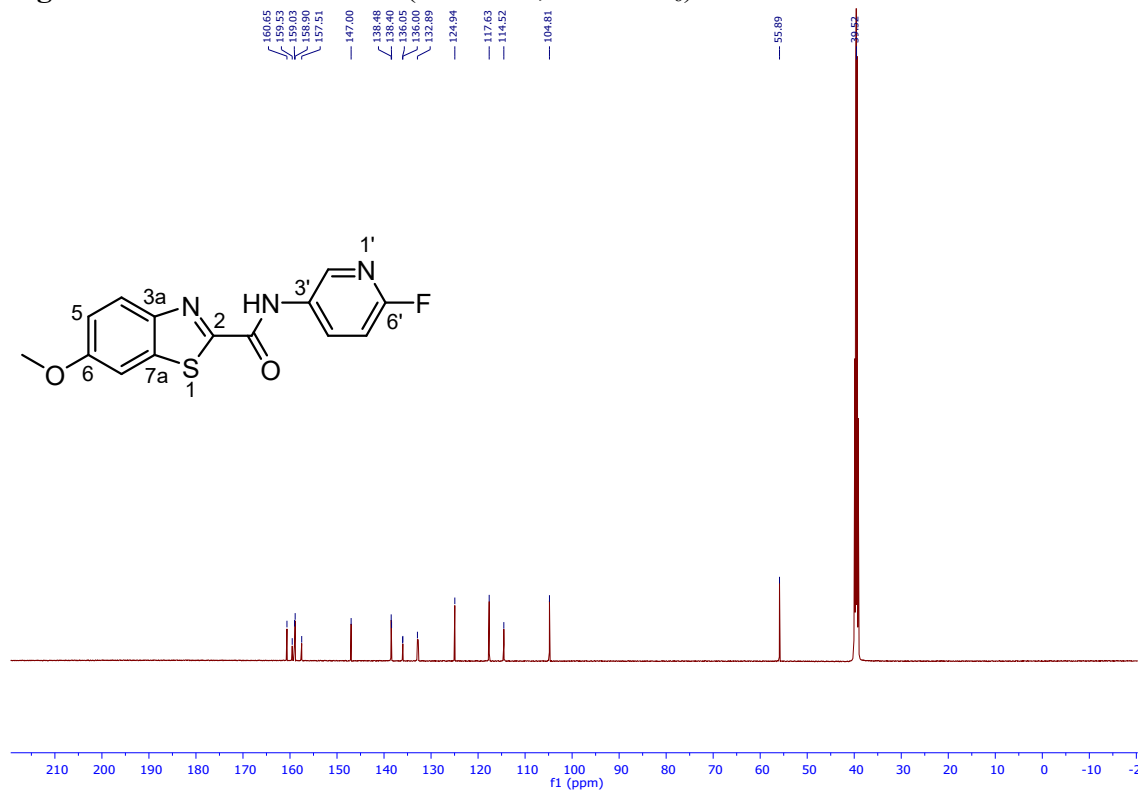

Figure S59.  $^1\text{H}$  NMR for **115** (400 MHz,  $\text{CDCl}_3$ )

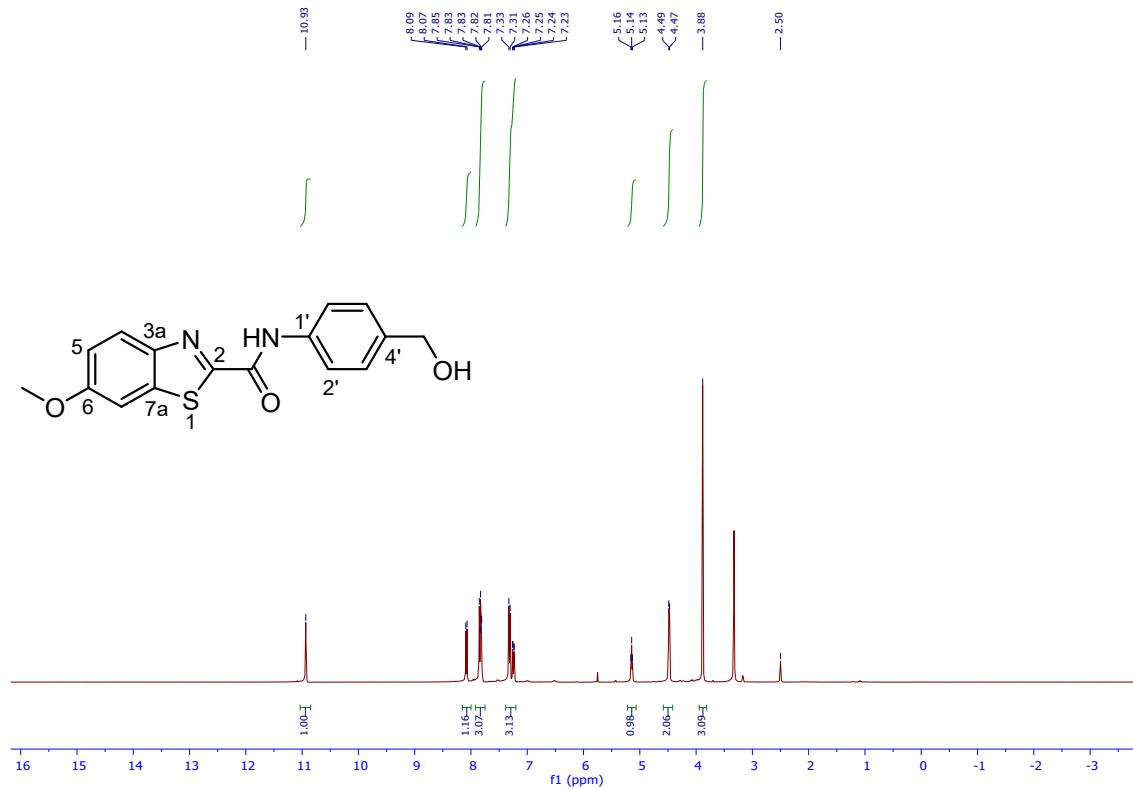

Figure S60.  $^{13}\text{C}$  NMR for **115** (400 MHz,  $\text{CDCl}_3$ )

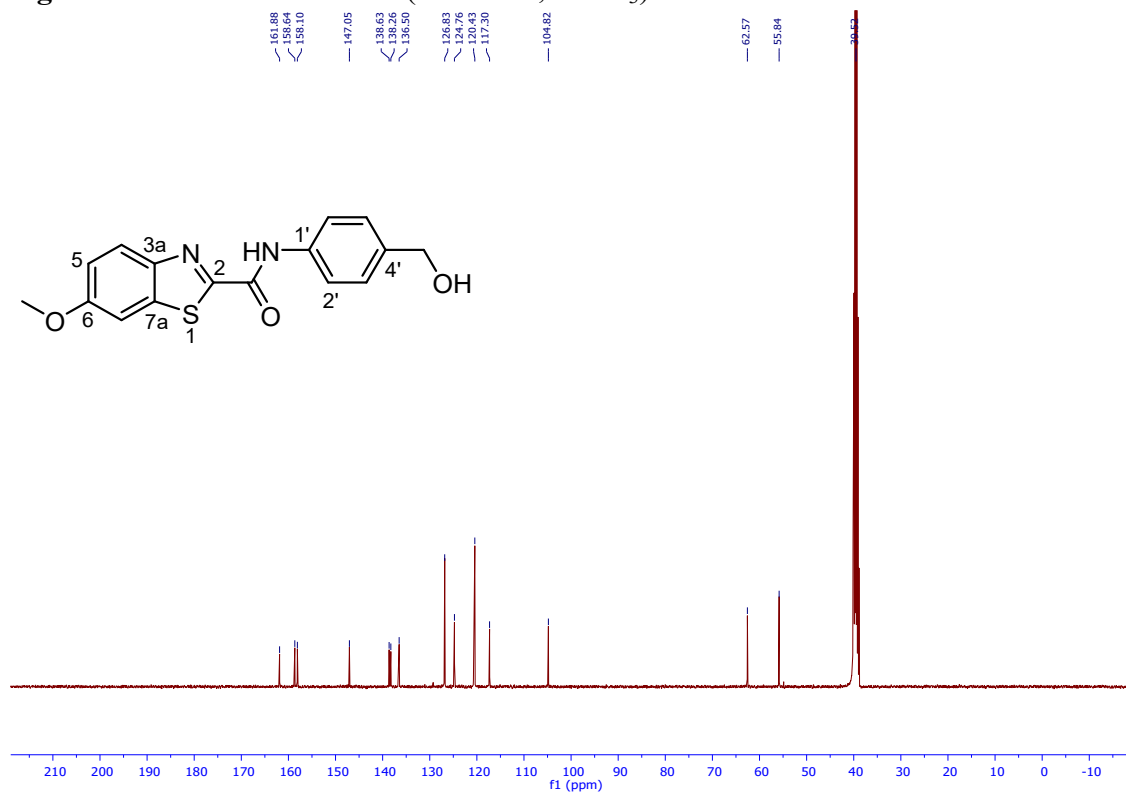

Figure S61.  $^1\text{H}$  NMR for **116** (400 MHz,  $\text{CDCl}_3$ )

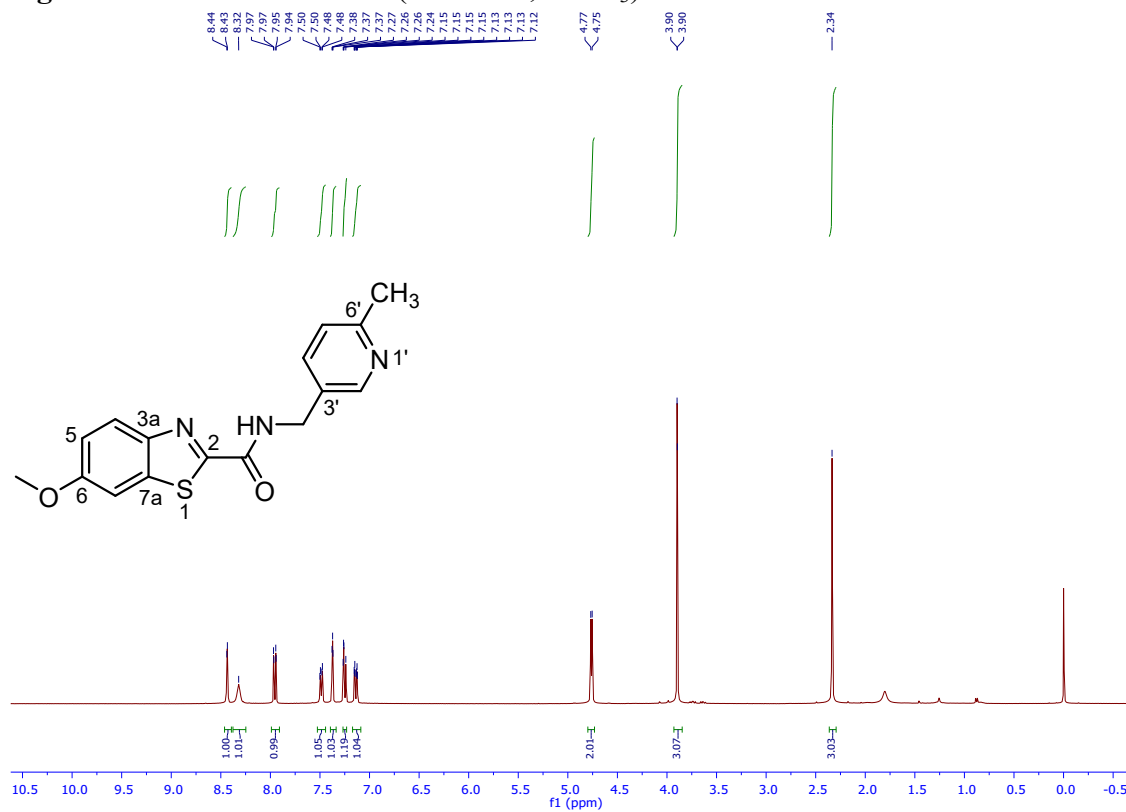

Figure S62.  $^{13}\text{C}$  NMR for **116** (400 MHz,  $\text{CDCl}_3$ )

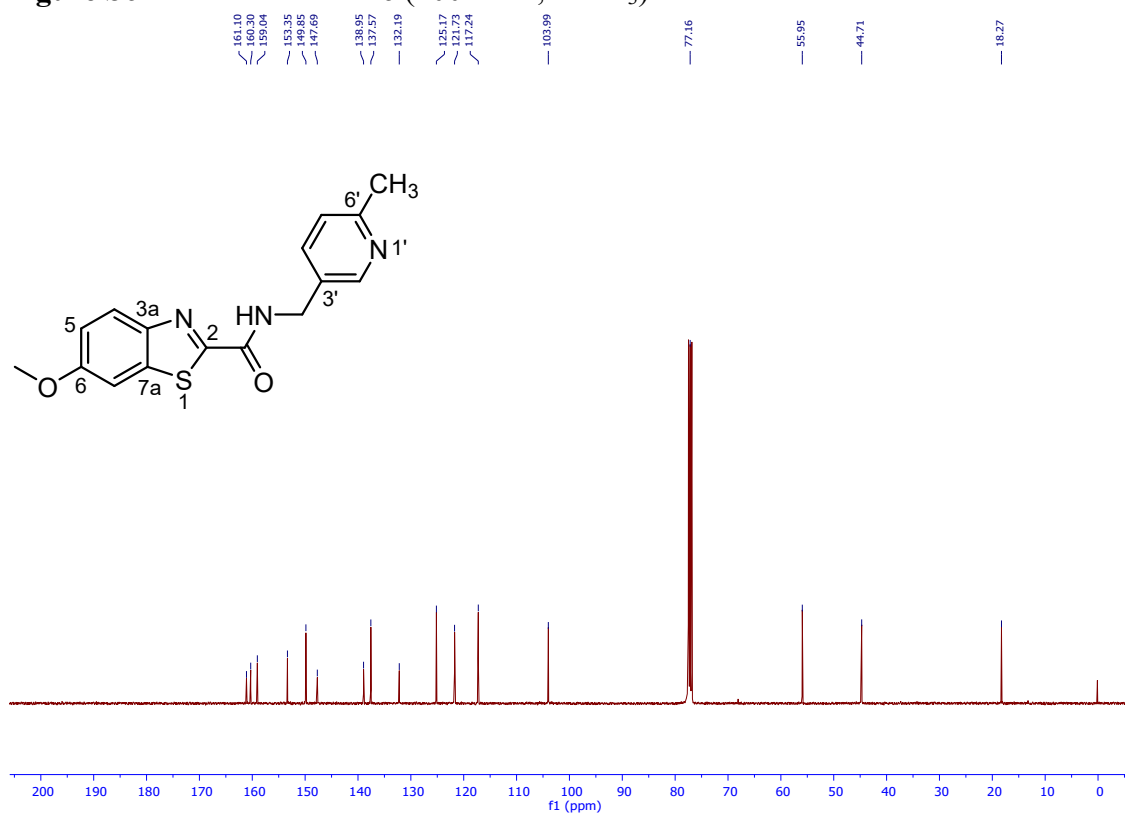

Figure S63.  $^1\text{H}$  NMR for **117** (400 MHz,  $\text{CDCl}_3$ )

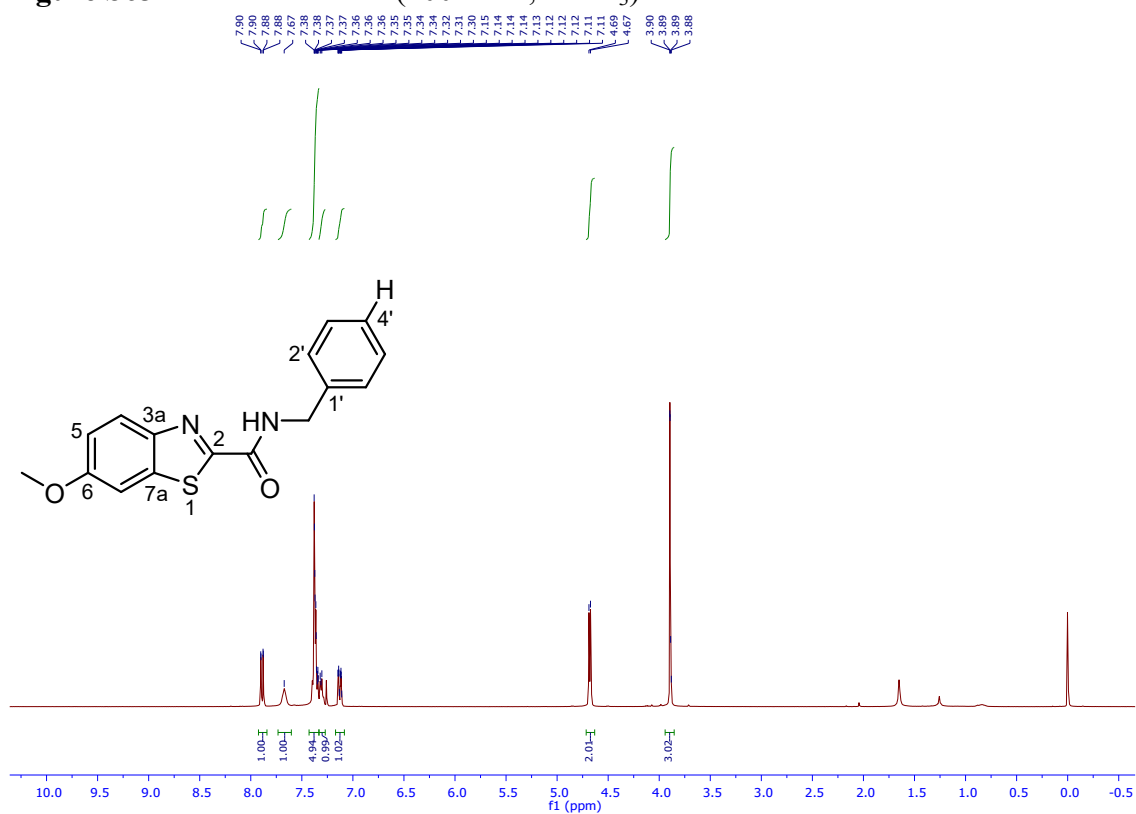

Figure S64. <sup>13</sup>C NMR for **117** (400 MHz, CDCl<sub>3</sub>)

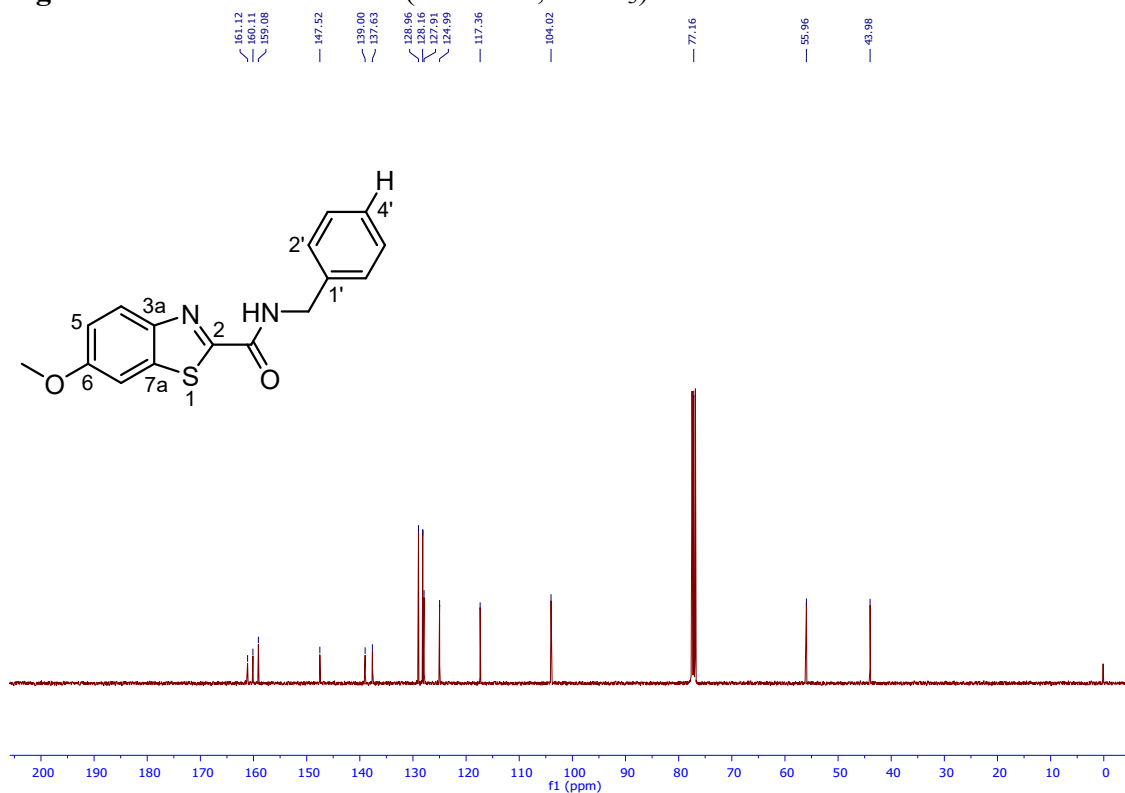

Figure S65. <sup>1</sup>H NMR for **118** (400 MHz, CDCl<sub>3</sub>)

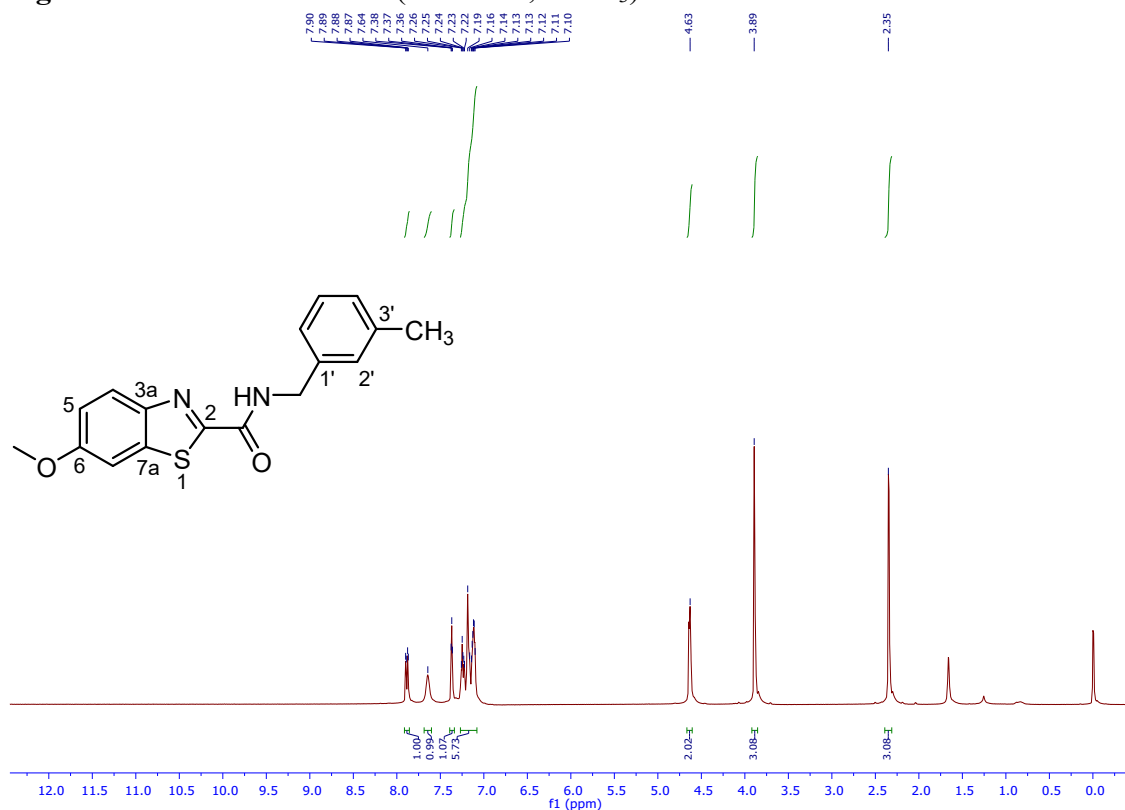

Figure S66.  $^{13}\text{C}$  NMR for **118** (400 MHz,  $\text{CDCl}_3$ )

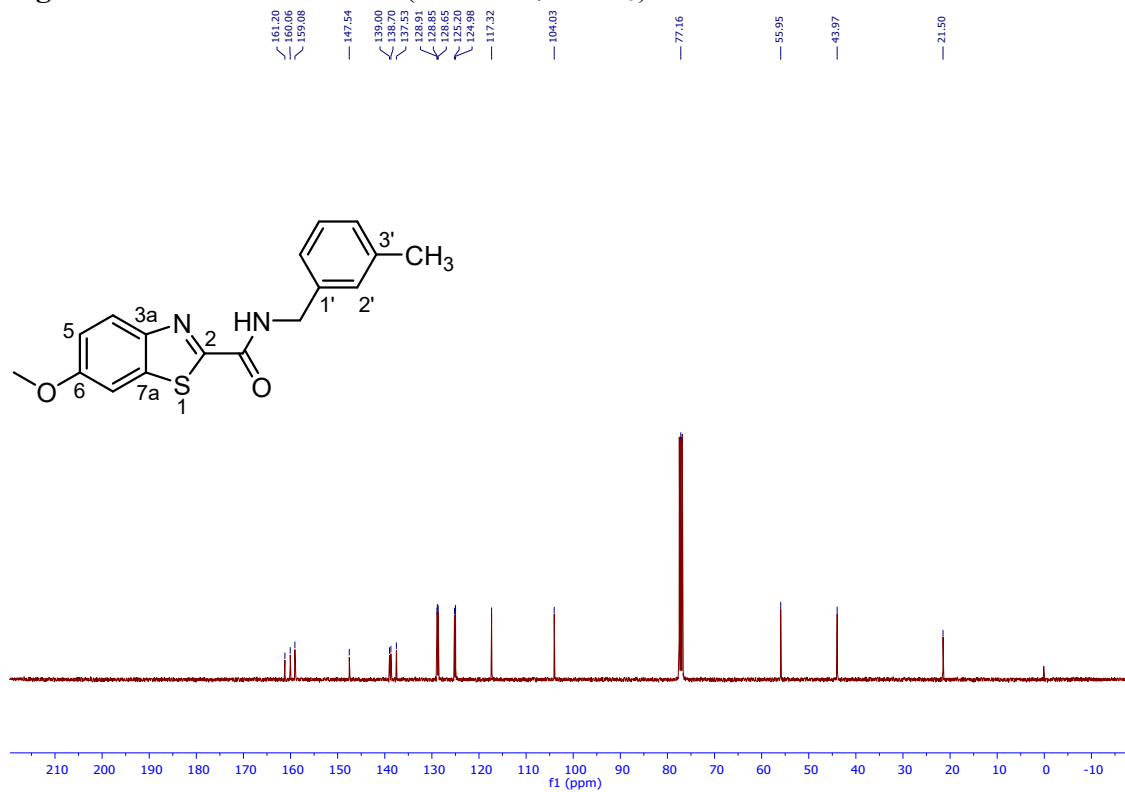

Figure S67.  $^1\text{H}$  NMR for **119** (400 MHz,  $\text{CDCl}_3$ )

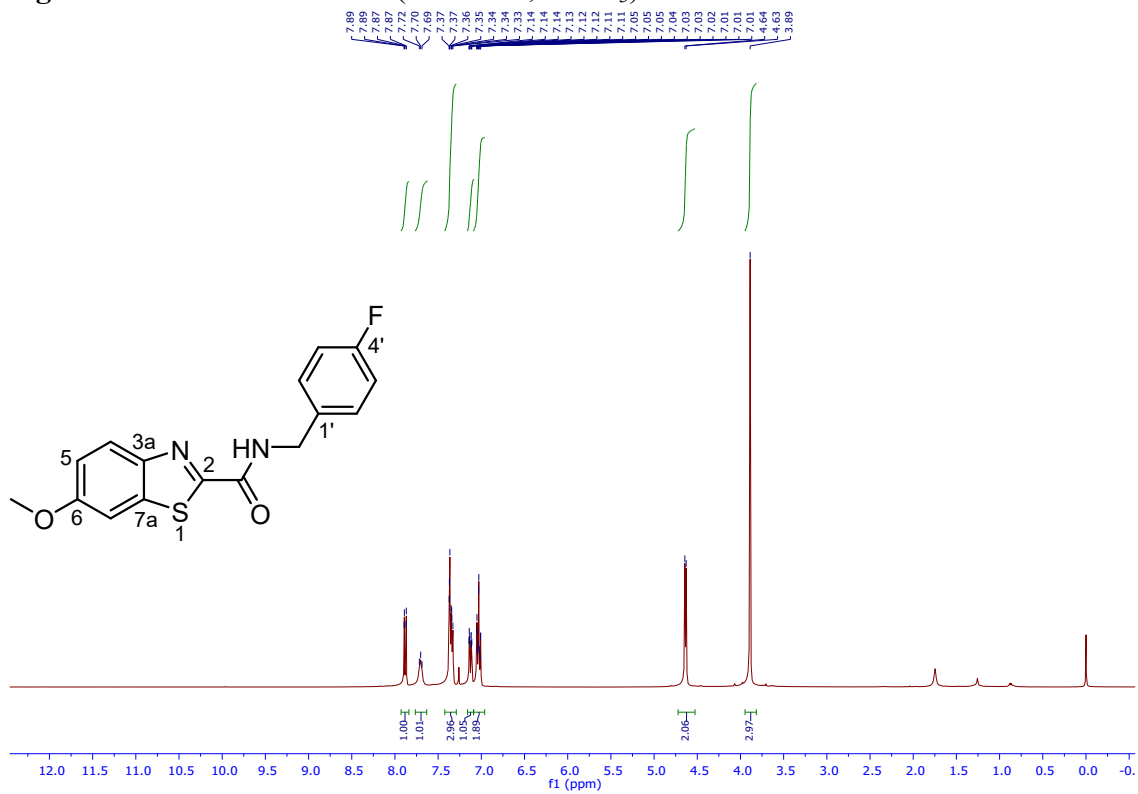

Figure S68.  $^{13}\text{C}$  NMR for **119** (100 MHz,  $\text{CDCl}_3$ )

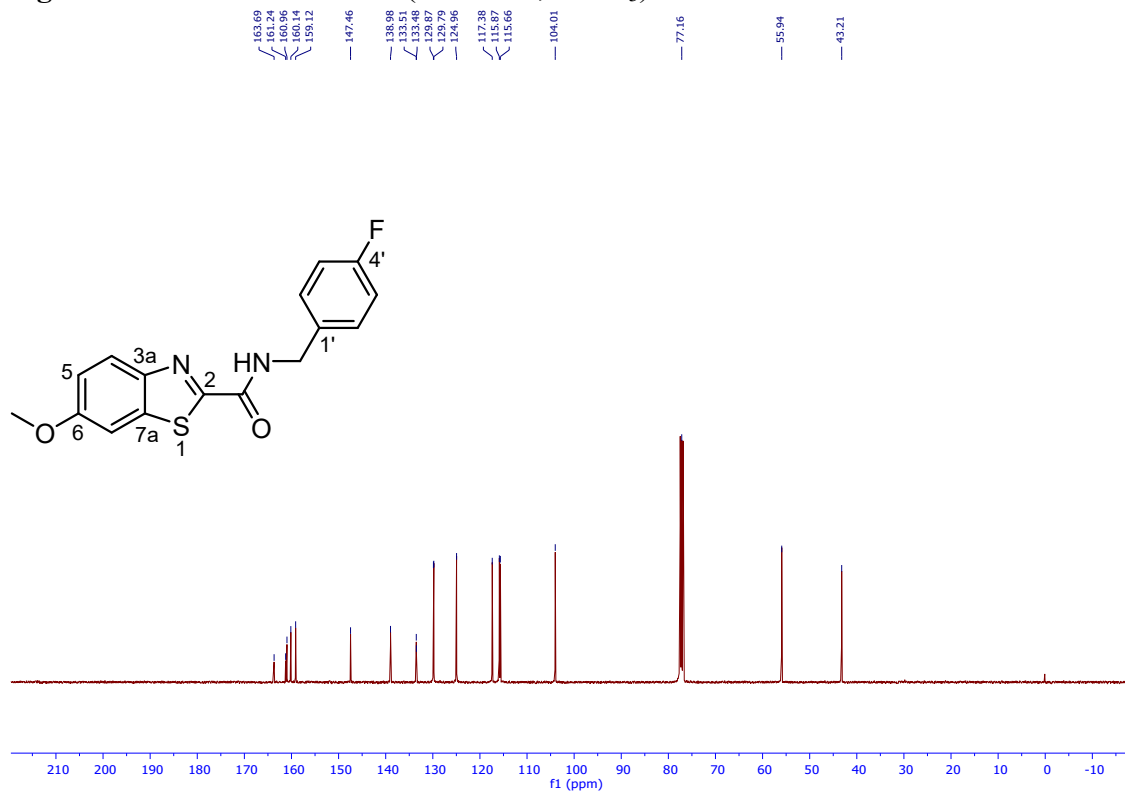

Figure S69.  $^1\text{H}$  NMR for **120** (400 MHz,  $\text{DMSO-}d_6$ )

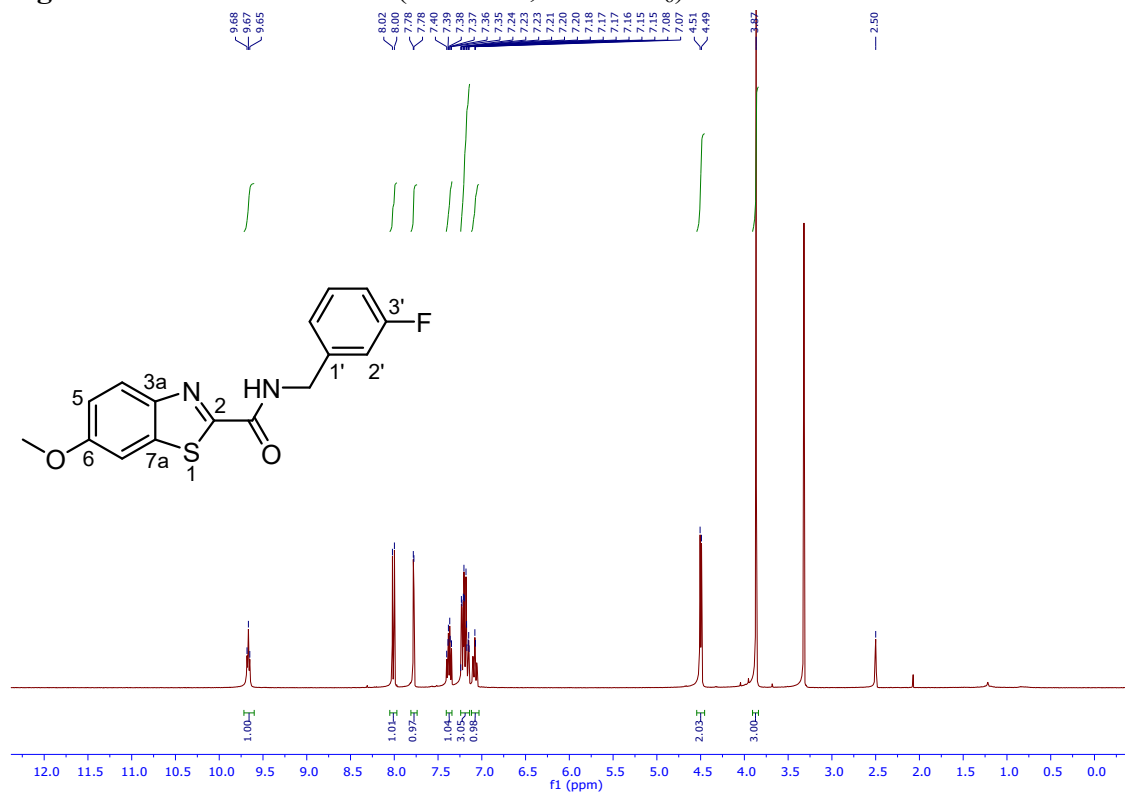



Figure S70.  $^{13}\text{C}$  NMR for **120** (100 MHz,  $\text{DMSO-}d_6$ )

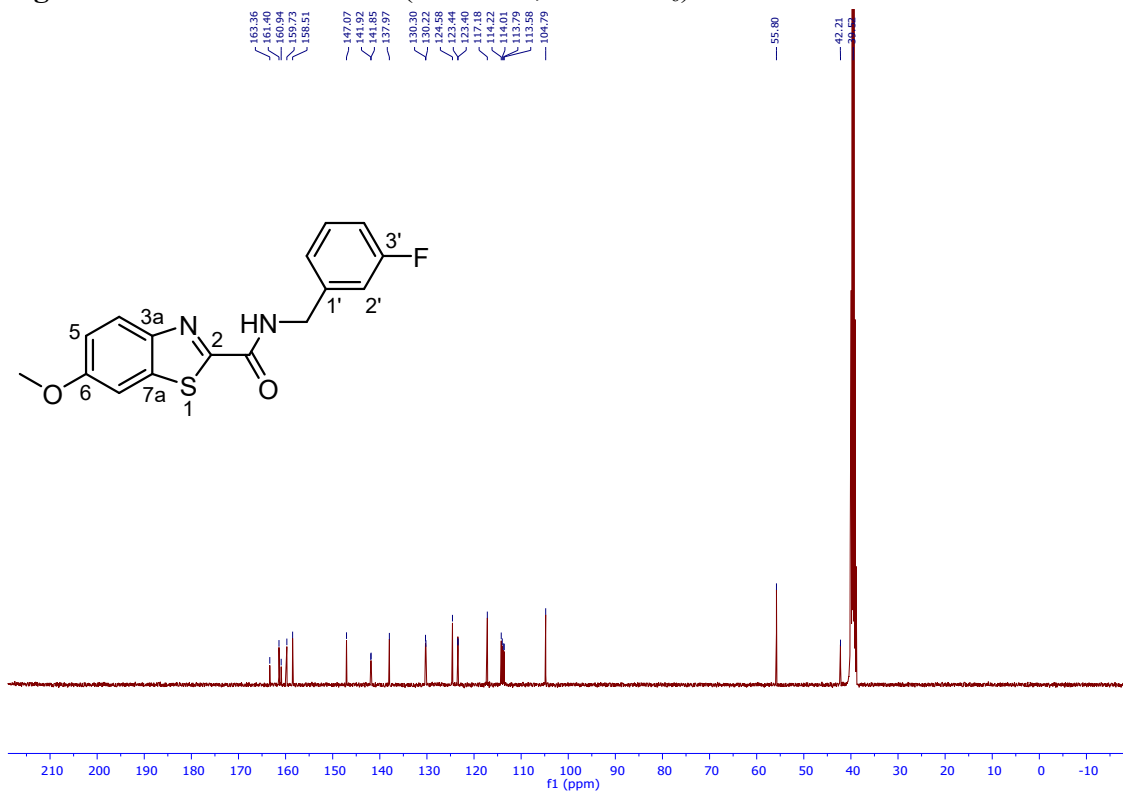

Figure S71.  $^1\text{H}$  NMR for **121** (400 MHz,  $\text{DMSO-}d_6$ )

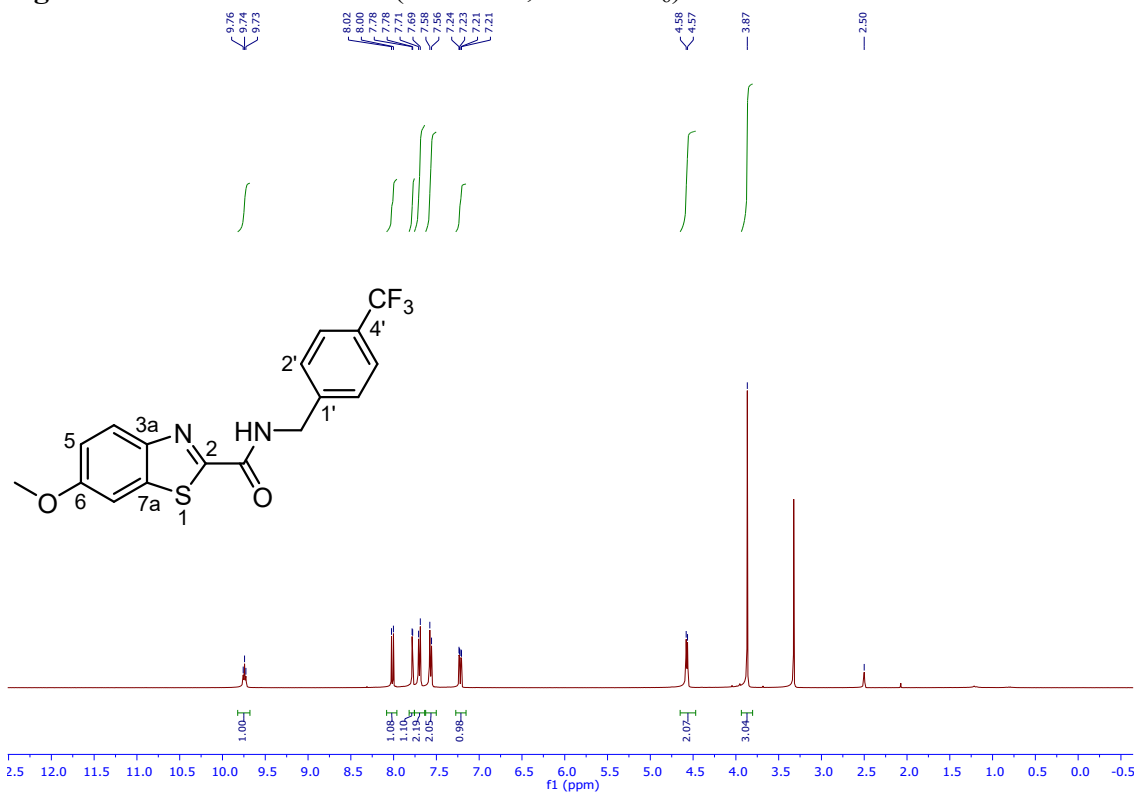

Figure S72.  $^{13}\text{C}$  NMR for **121** (100 MHz,  $\text{DMSO-}d_6$ )

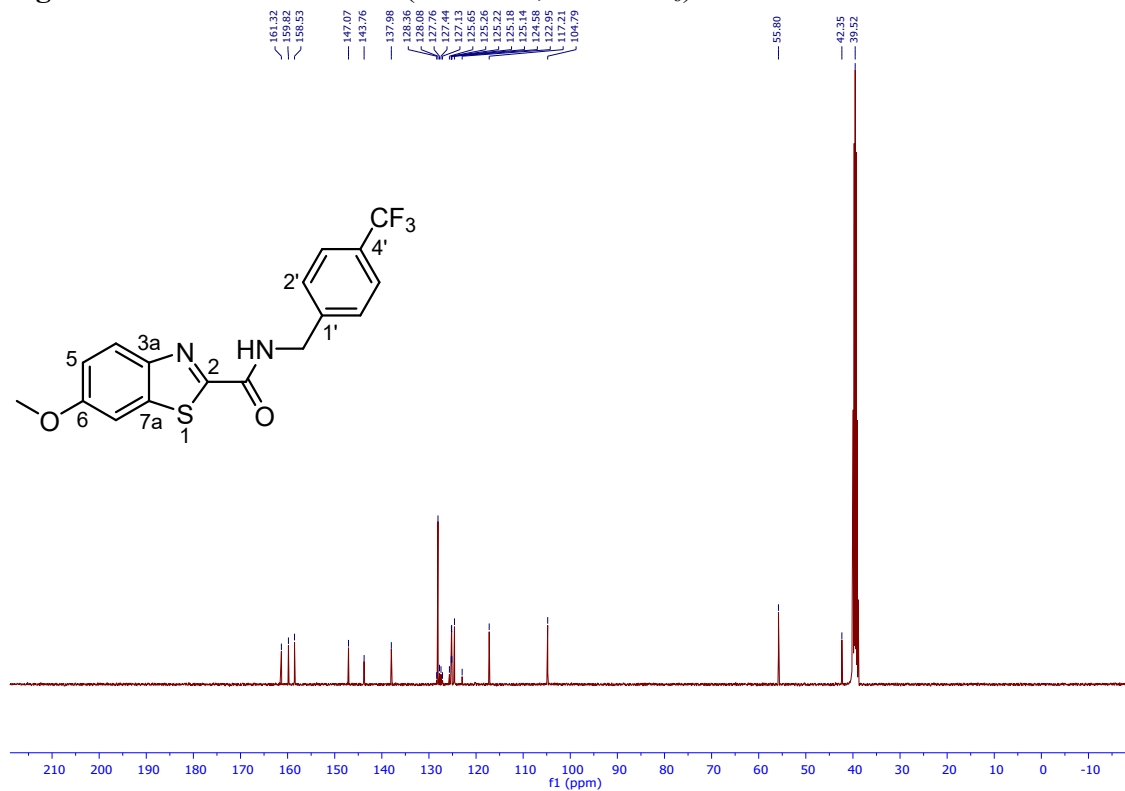

Figure S73.  $^1\text{H}$  NMR for **127** (500 MHz,  $\text{CDCl}_3$ )

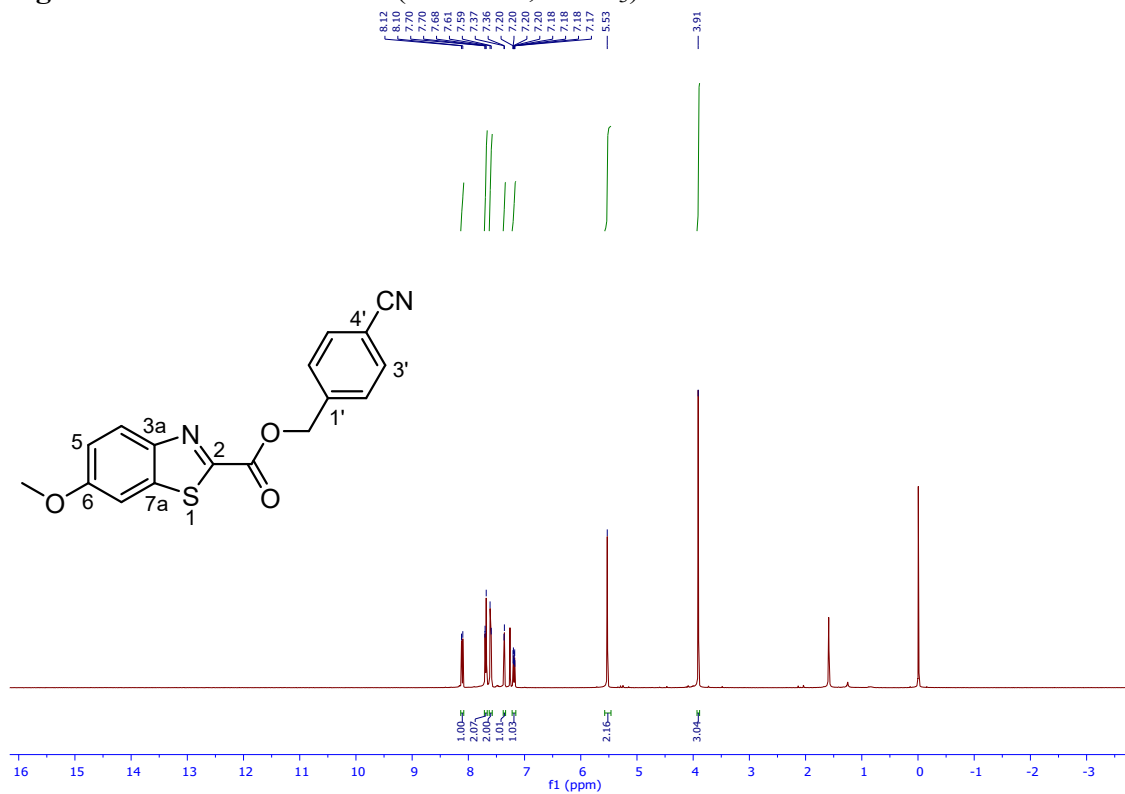

Figure S74.  $^{13}\text{C}$  NMR for **127** (500 MHz,  $\text{CDCl}_3$ )

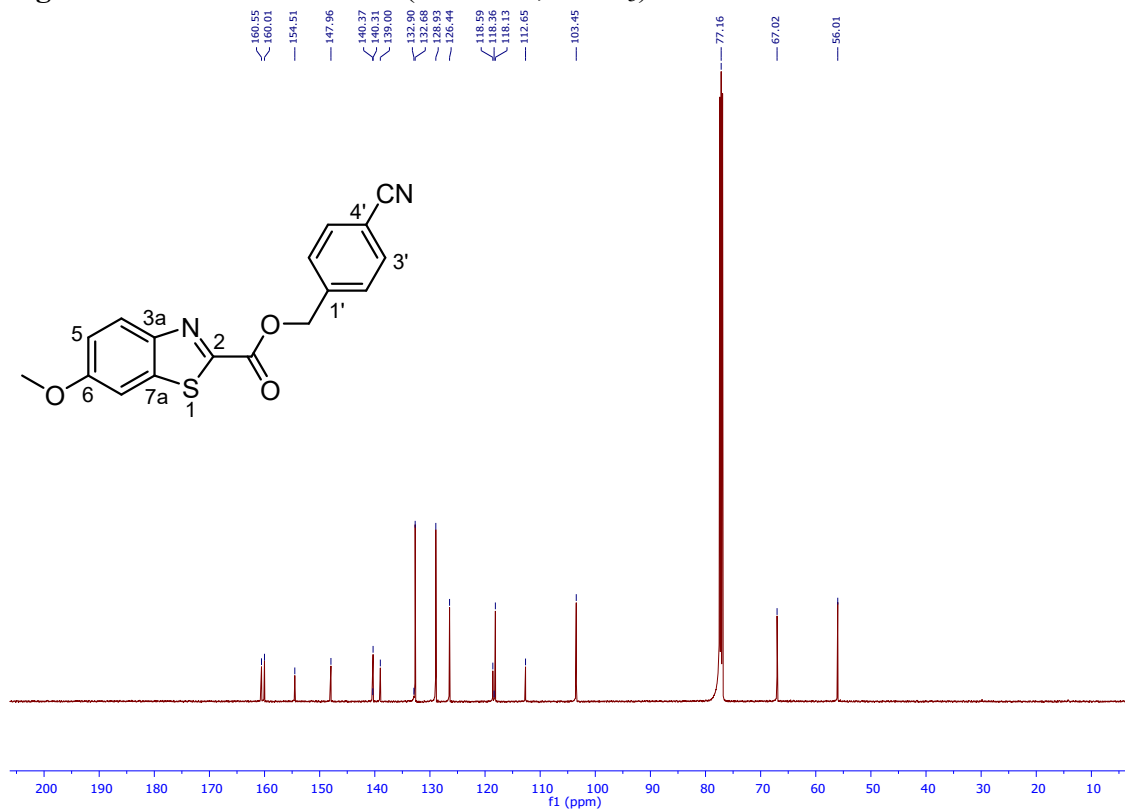

Figure S75.  $^1\text{H}$  NMR for **128** (500 MHz,  $\text{DMSO}-d_6$ )

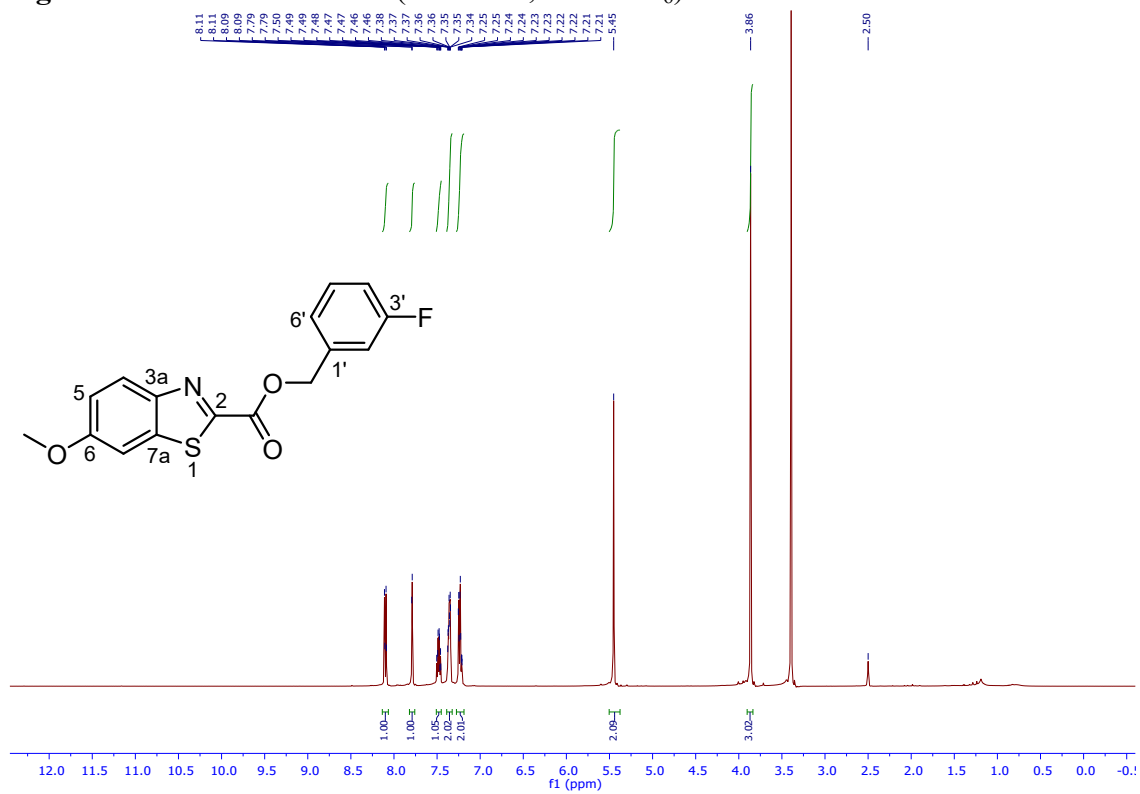

Figure S76.  $^{13}\text{C}$  NMR for **128** (125 MHz,  $\text{DMSO-}d_6$ )

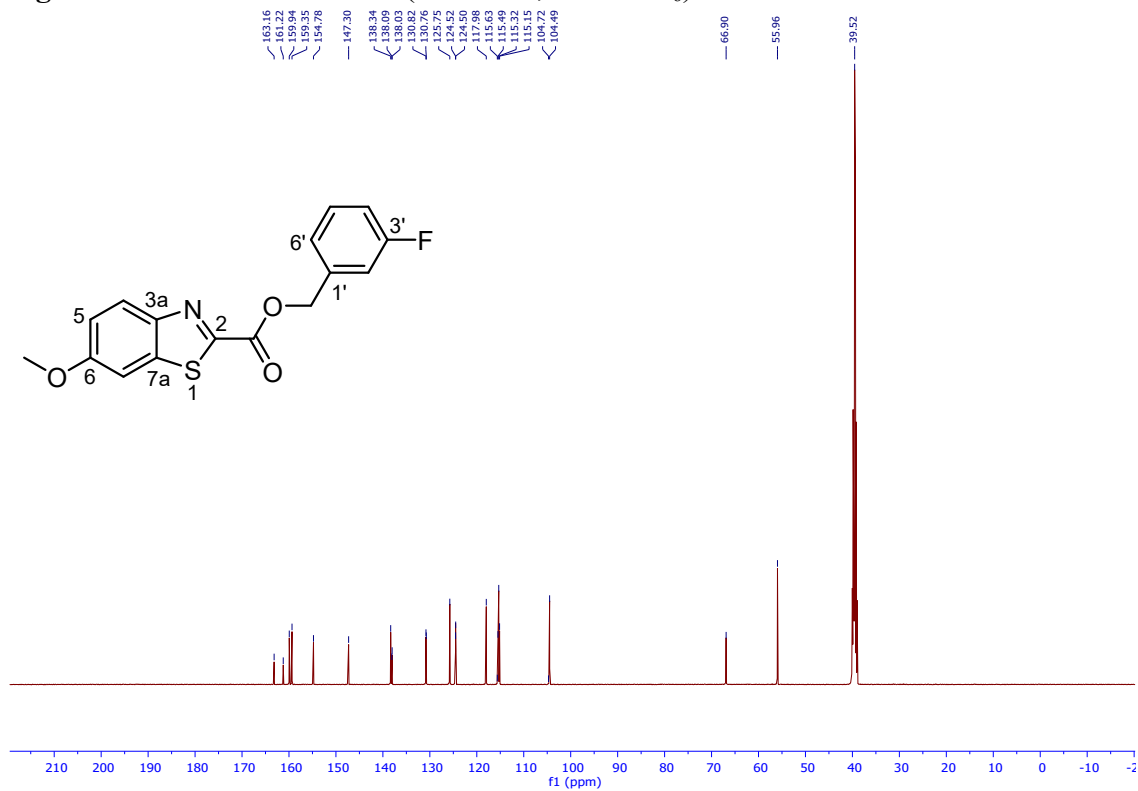

Figure S75.  $^1\text{H}$  NMR for **129** (500 MHz,  $\text{DMSO-}d_6$ )

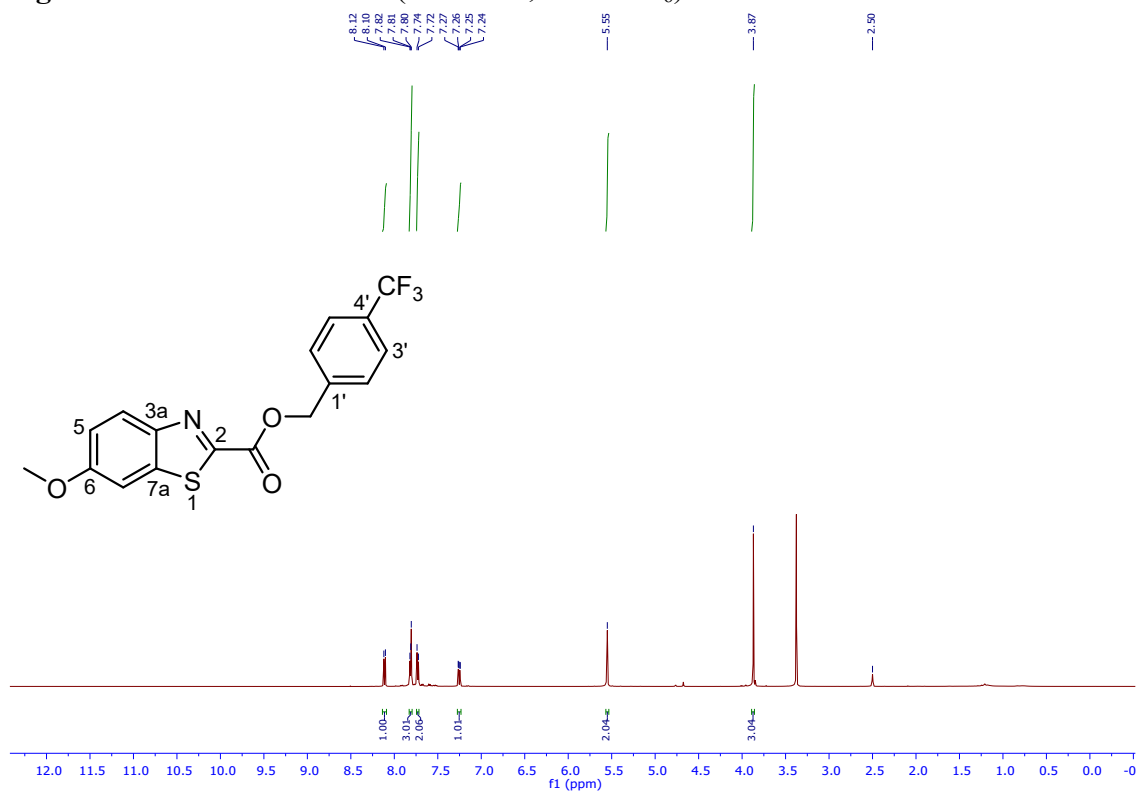

Figure S76.  $^{13}\text{C}$  NMR for **129** (125 MHz,  $\text{DMSO-}d_6$ )

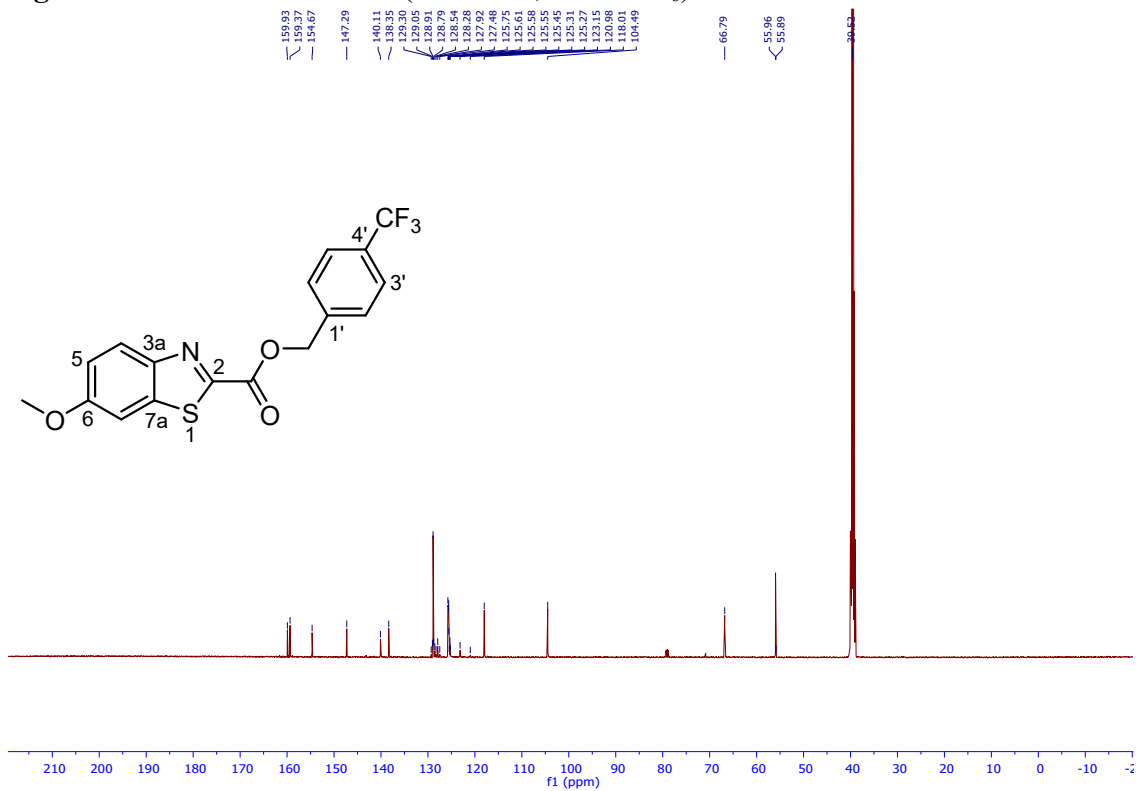

Figure S75.  $^1\text{H}$  NMR for **130** (400 MHz,  $\text{CDCl}_3$ )

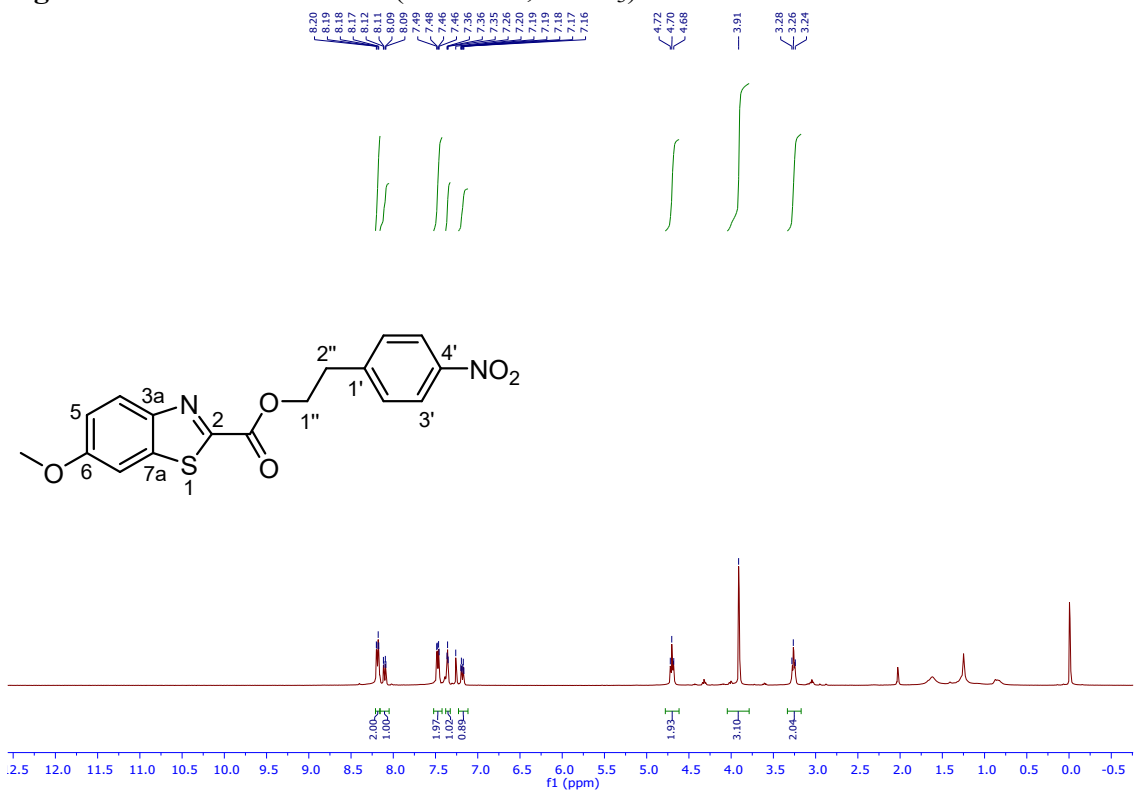

**Figure S76.**  $^{13}\text{C}$  NMR for **130** (400 MHz,  $\text{CDCl}_3$ )

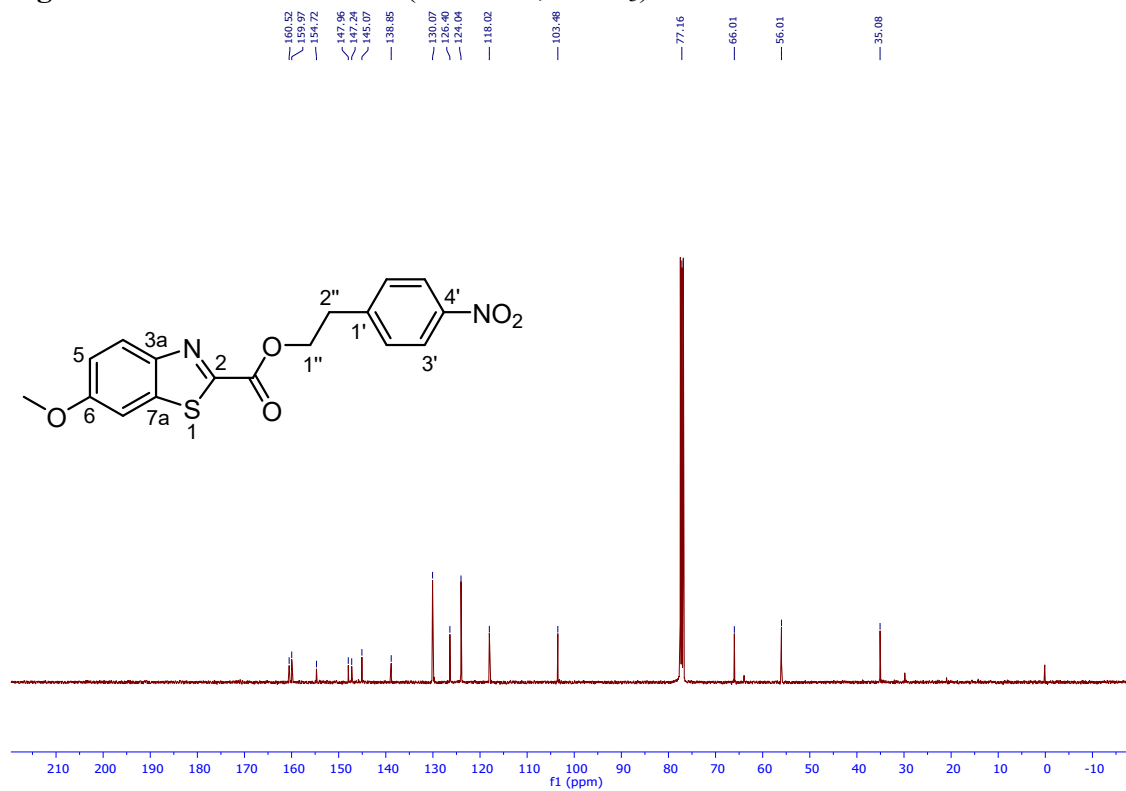

#### 4. $^1\text{H}$ NMR and $^{13}\text{C}$ NMR Spectra of Key Intermediates

$^1\text{H}$  NMR for **23** (400 MHz,  $\text{CDCl}_3$ )

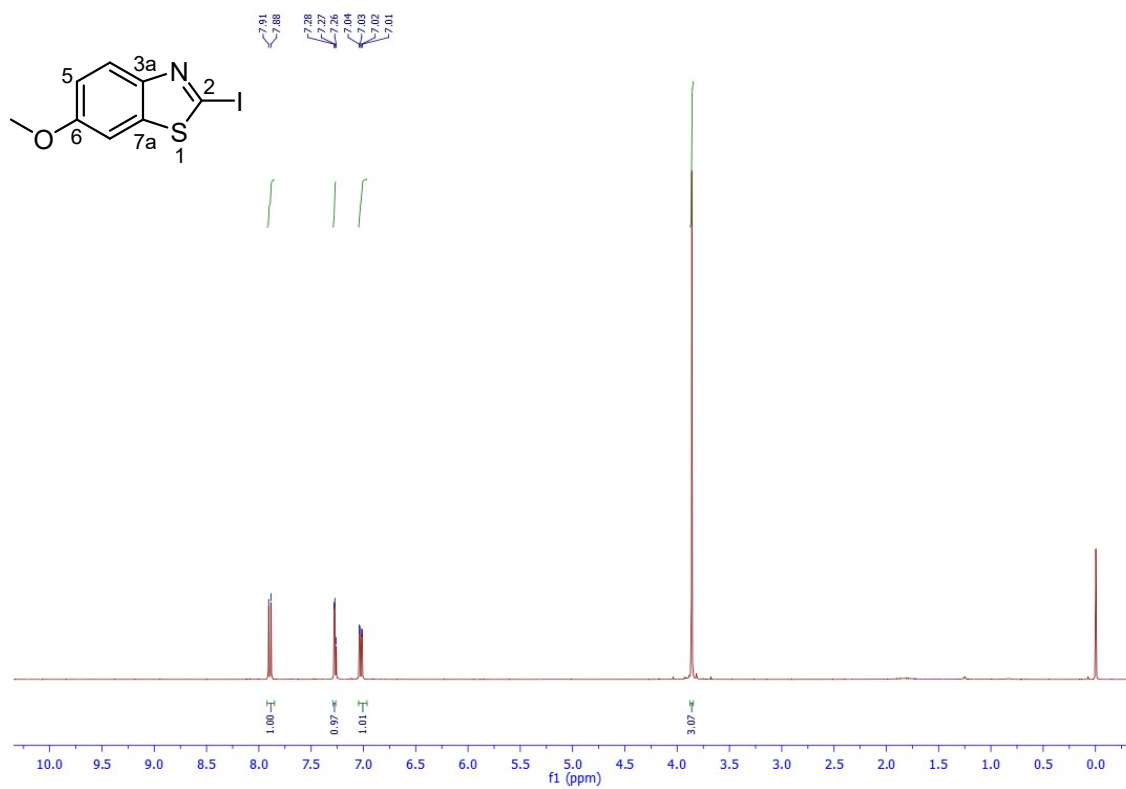

<sup>13</sup>C NMR for **23** (400 MHz, CDCl<sub>3</sub>)

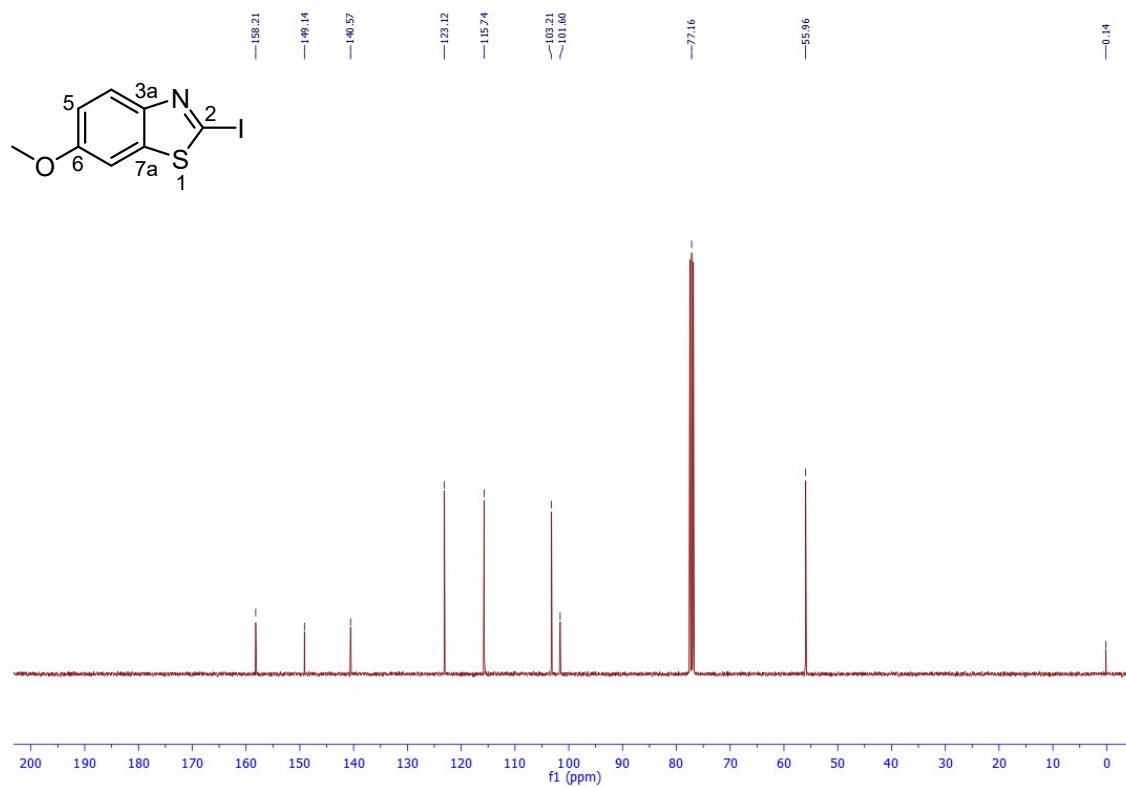

<sup>1</sup>H NMR for **24** (400 MHz, CDCl<sub>3</sub>)

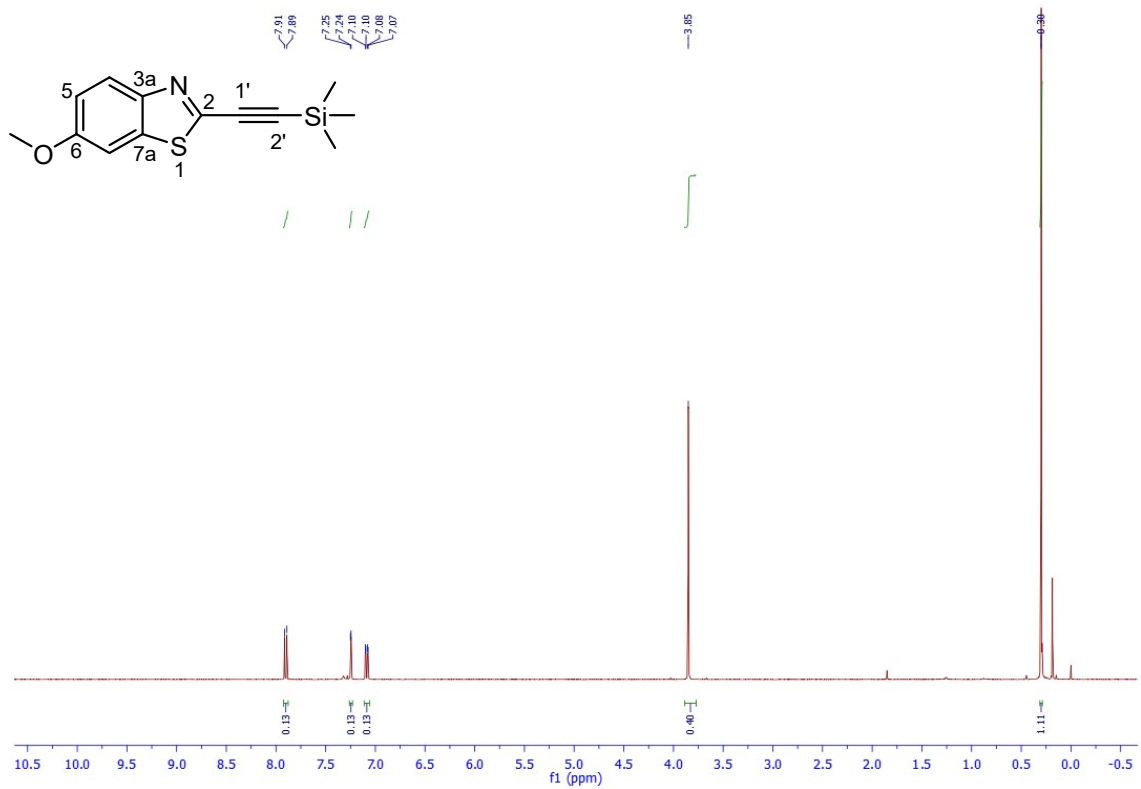

<sup>13</sup>C NMR for **24** (400 MHz, CDCl<sub>3</sub>)

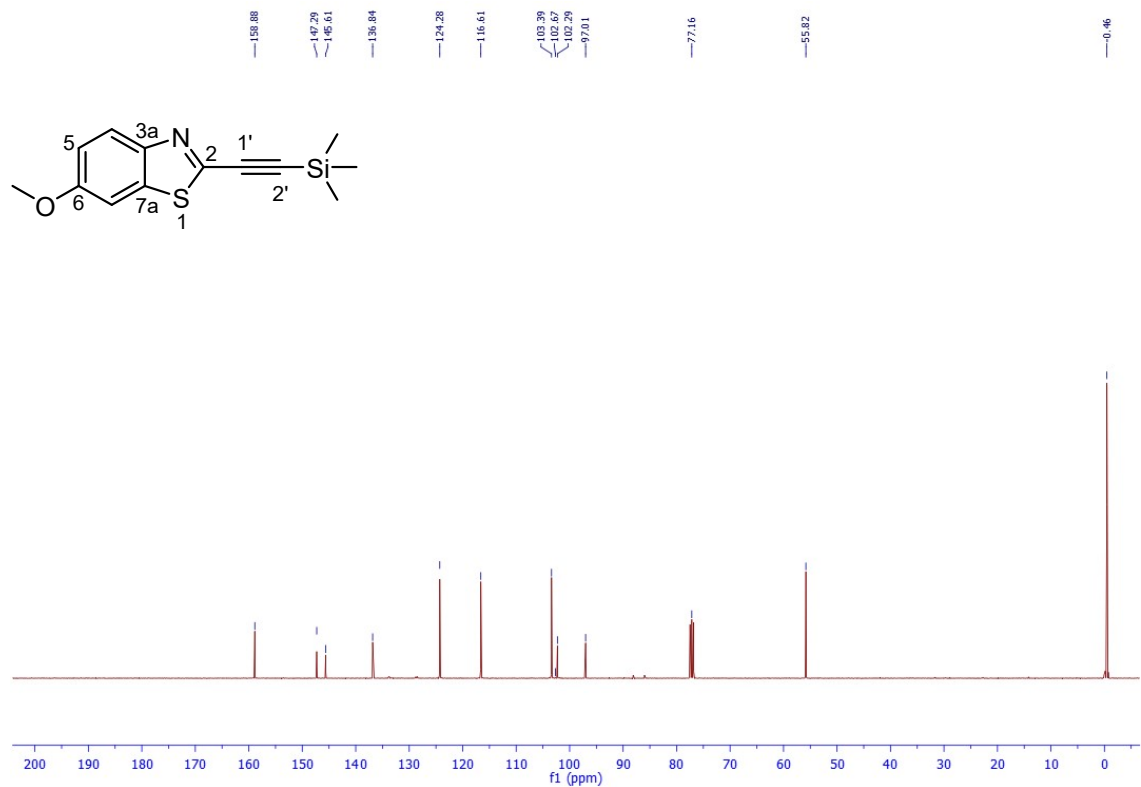

<sup>1</sup>H NMR for **25** (400 MHz, CDCl<sub>3</sub>)



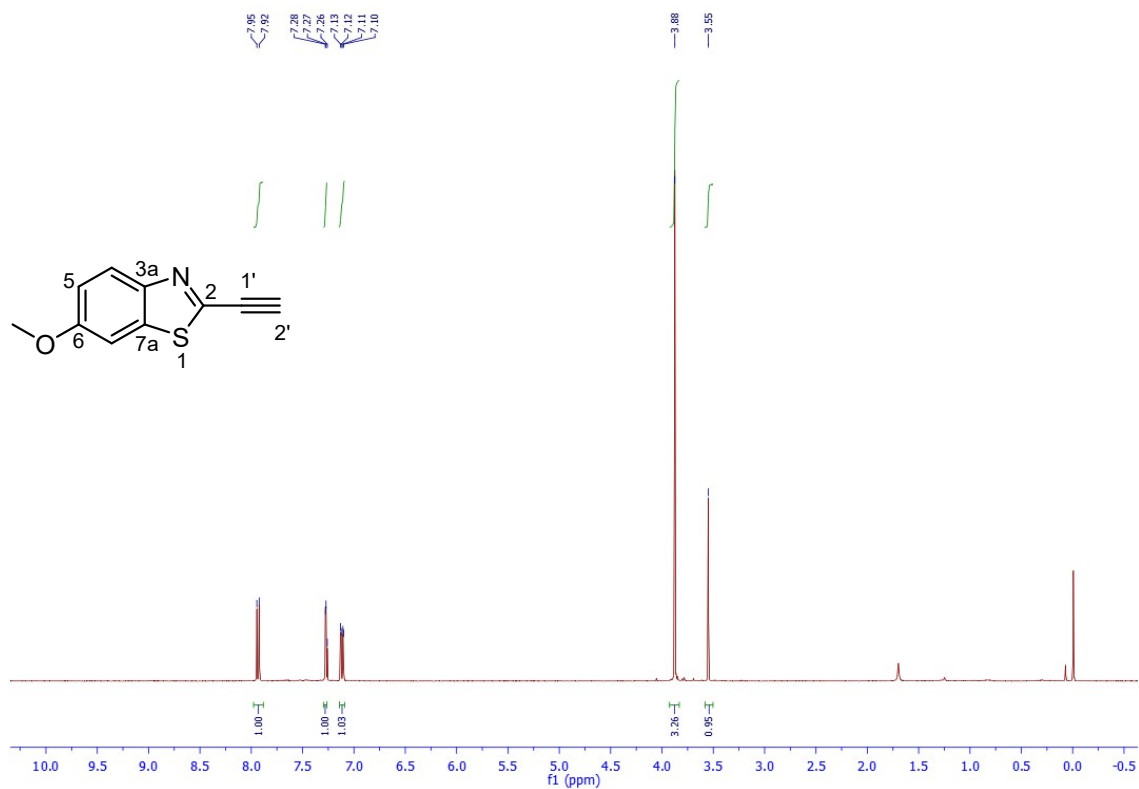

<sup>13</sup>C NMR for **25** (400 MHz, CDCl<sub>3</sub>)

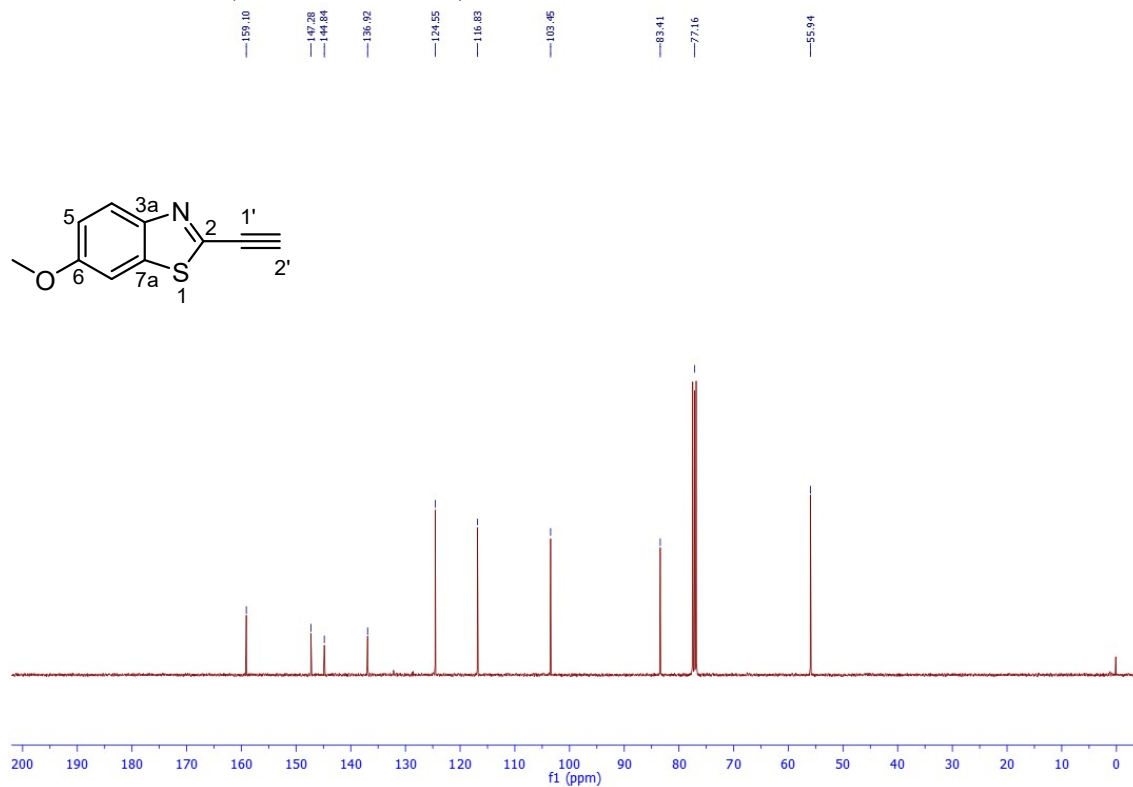

<sup>1</sup>H NMR for **27** (400 MHz, CDCl<sub>3</sub>)

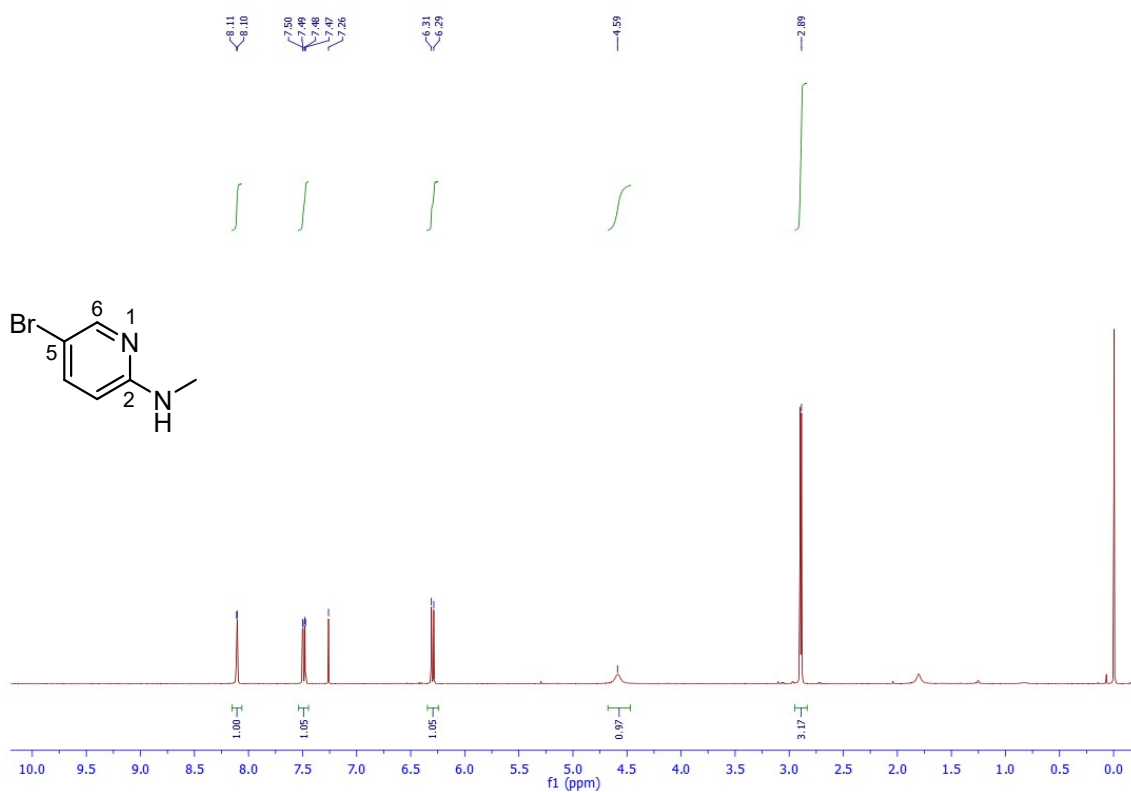

**<sup>13</sup>C NMR for 27 (400 MHz, CDCl<sub>3</sub>)**

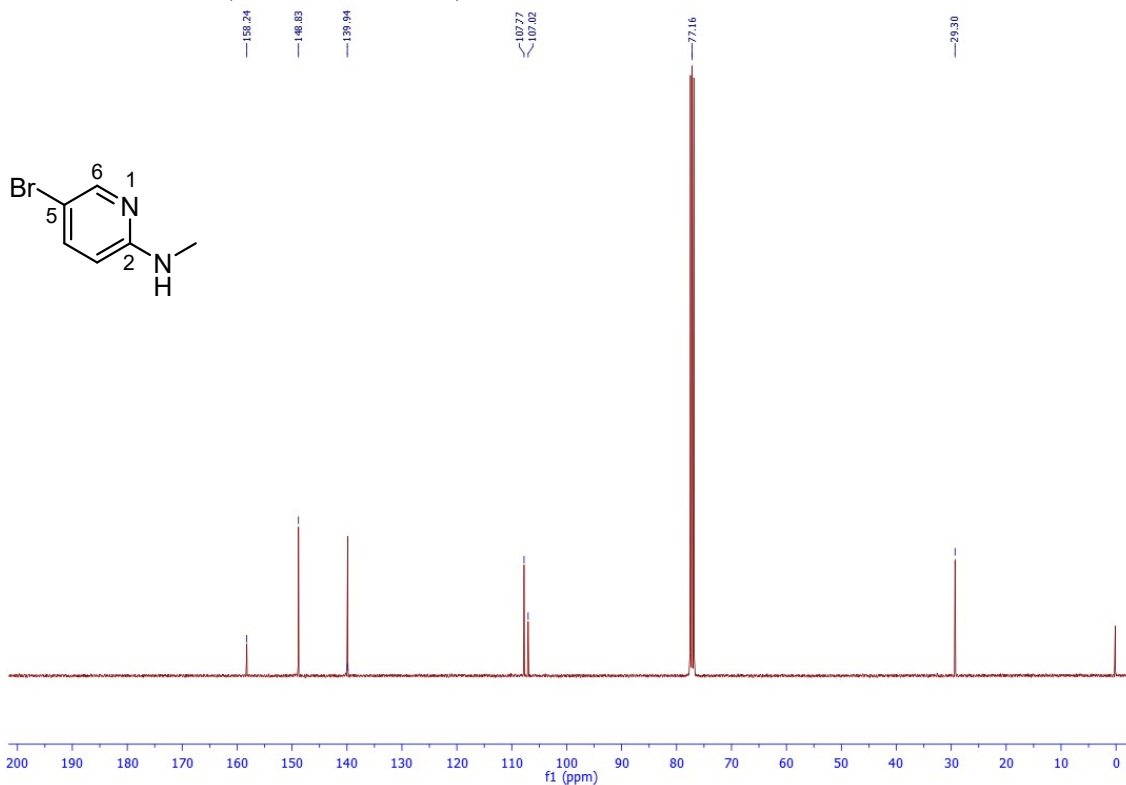

**<sup>1</sup>H NMR for the mixture of 28 and 27 (400 MHz, CDCl<sub>3</sub>)**

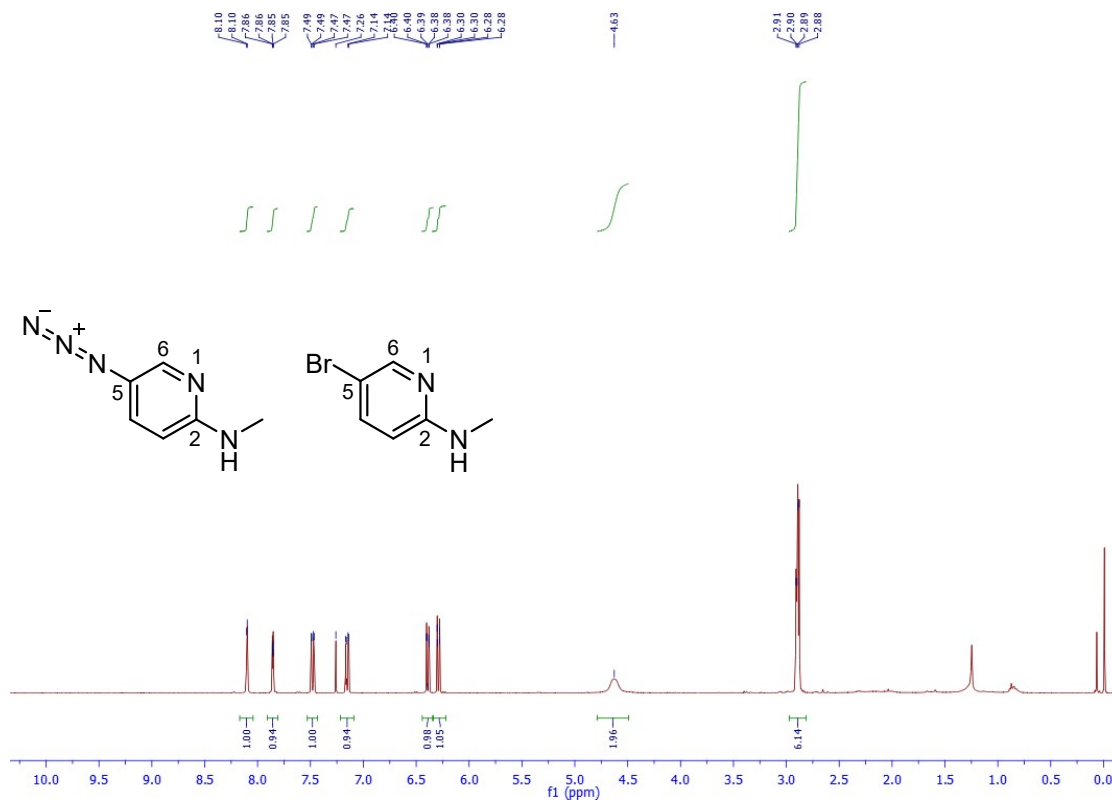

<sup>1</sup>H NMR for **29** (400 MHz, CDCl<sub>3</sub>)

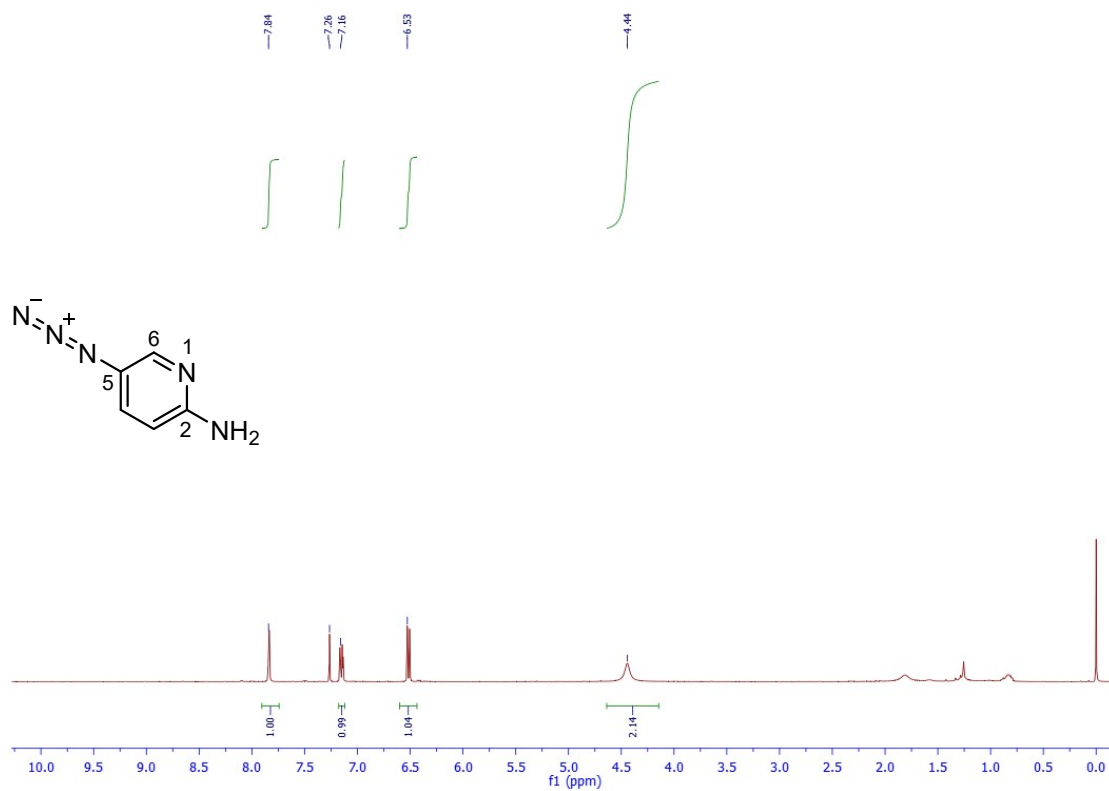

<sup>13</sup>C NMR for **29** (400 MHz, CDCl<sub>3</sub>)

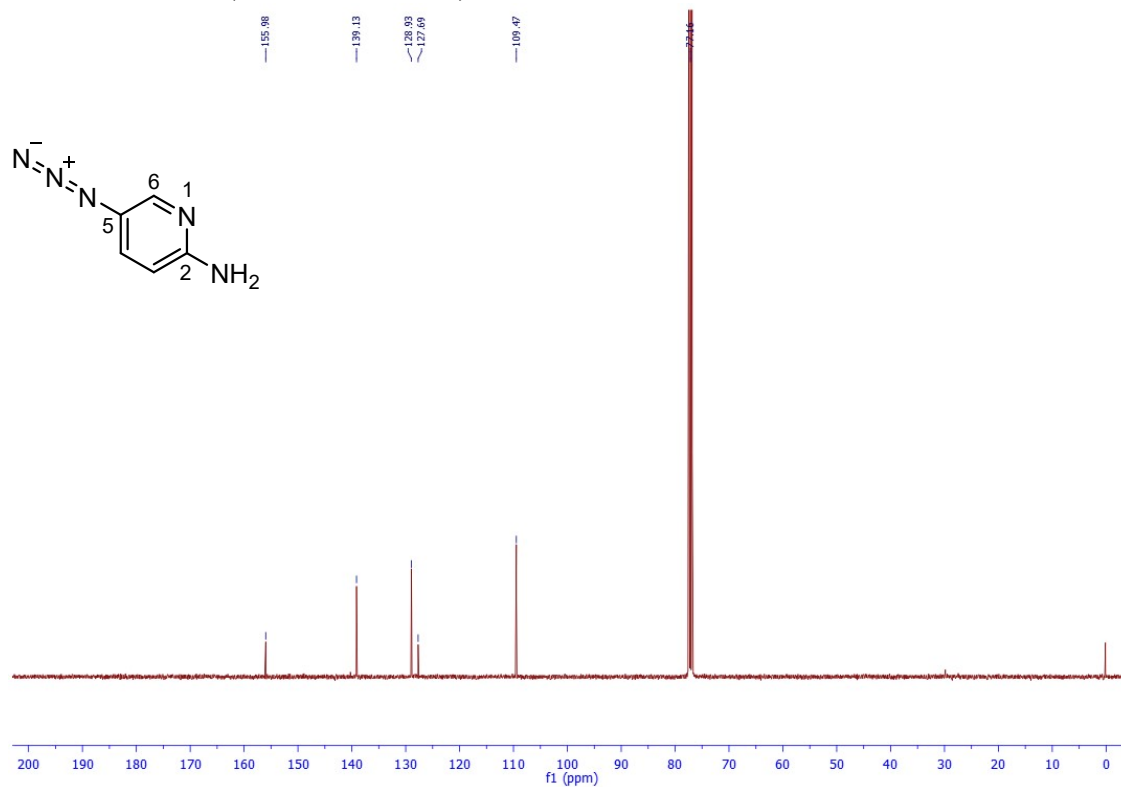

<sup>1</sup>H NMR for **35** (400 MHz, CD<sub>3</sub>OD)

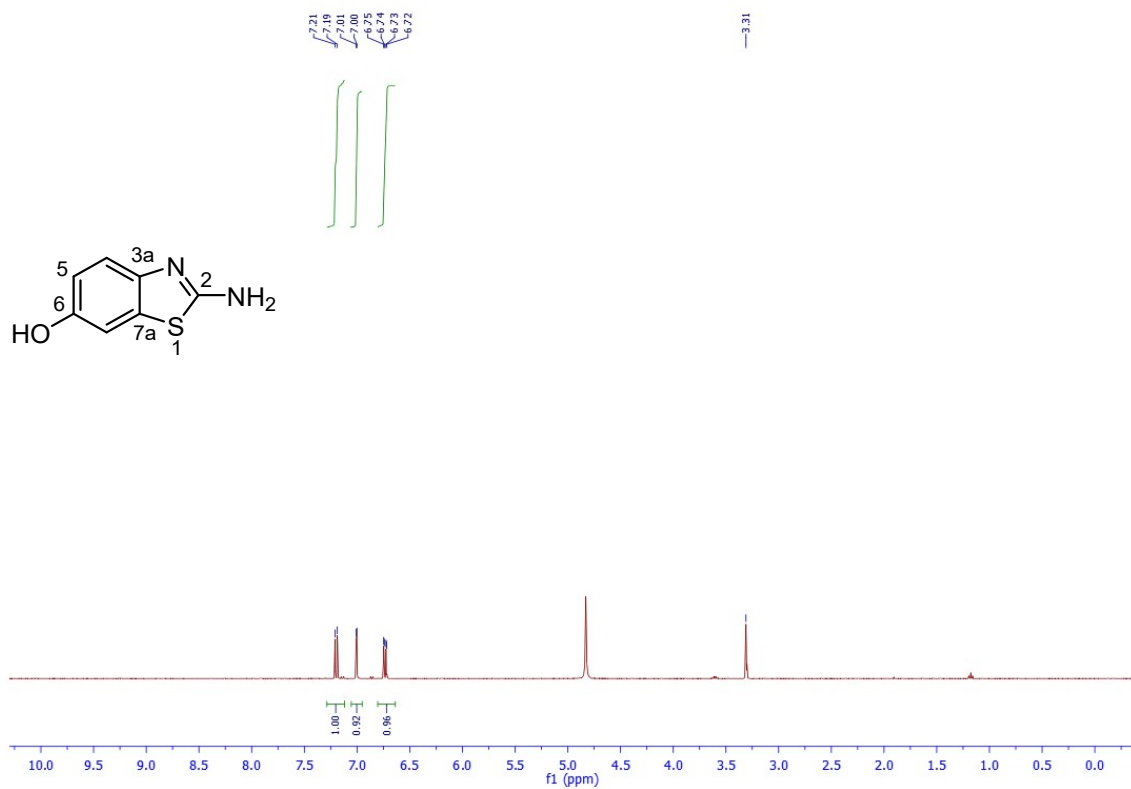

**<sup>13</sup>C NMR for 35 (400 MHz, DMSO-*d*<sub>6</sub>)**

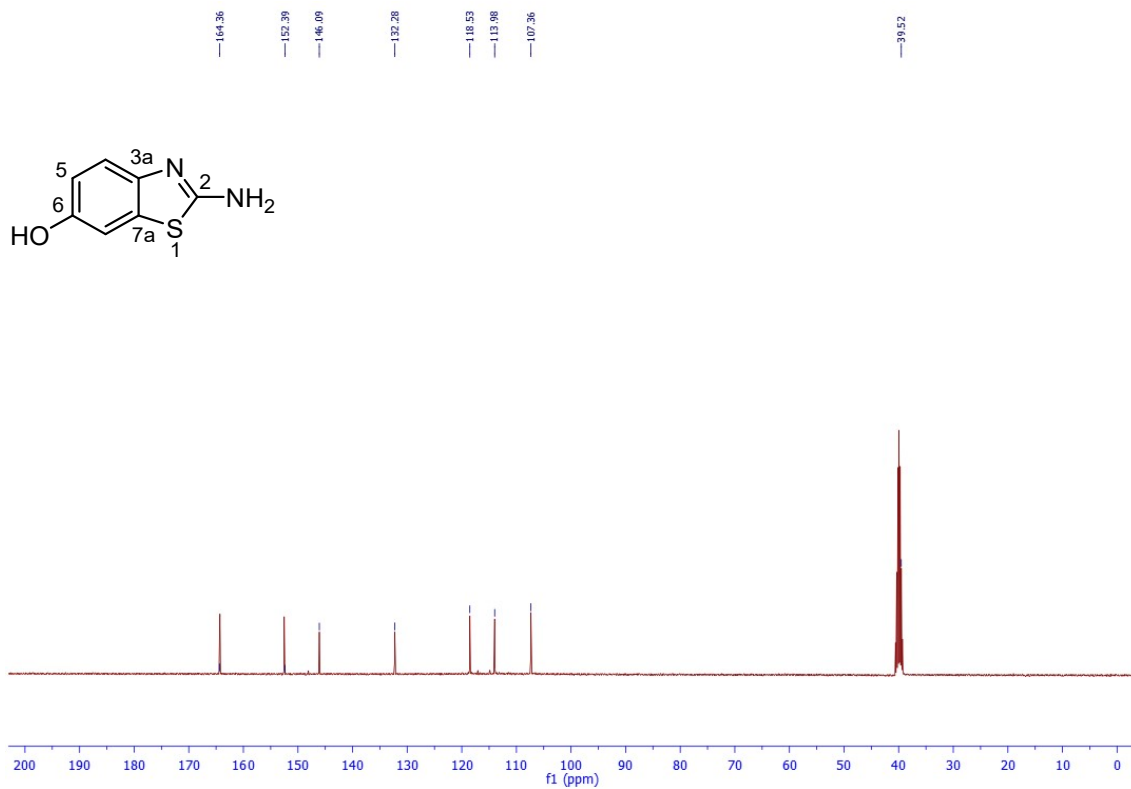

**<sup>1</sup>H NMR for 41 (400 MHz, CDCl<sub>3</sub>)**

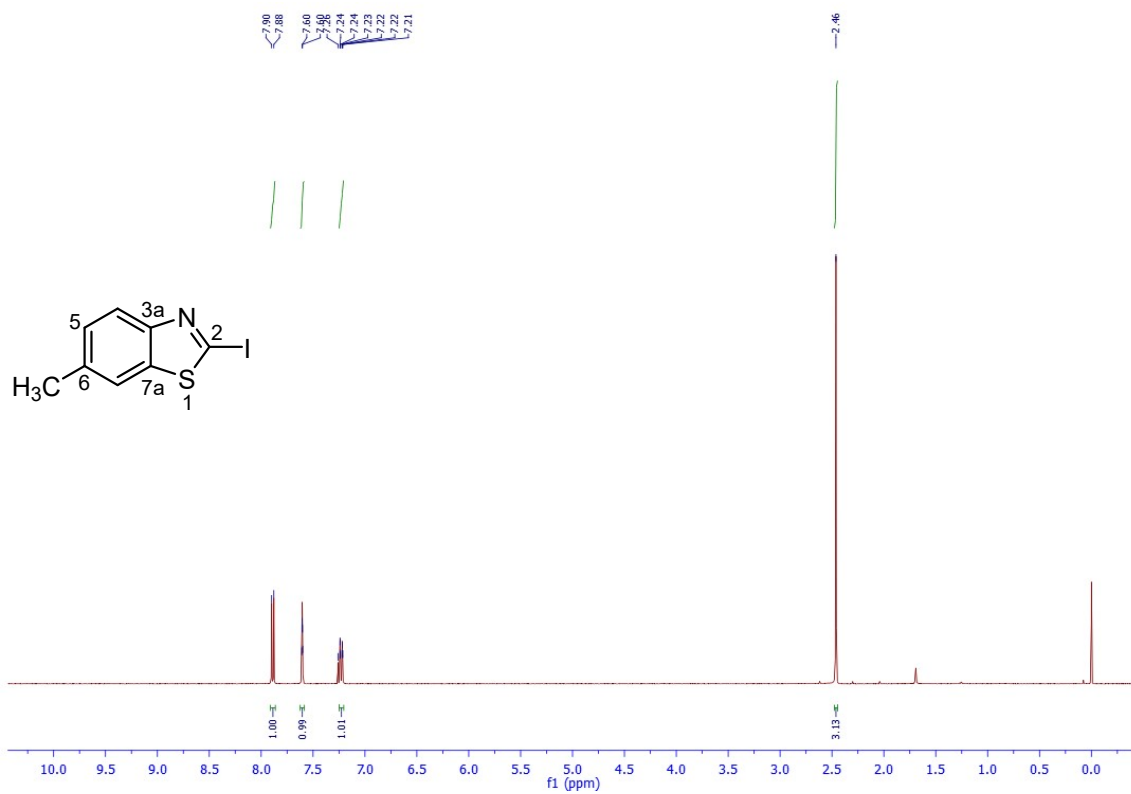

**<sup>13</sup>C NMR for 41 (400 MHz, CDCl<sub>3</sub>)**

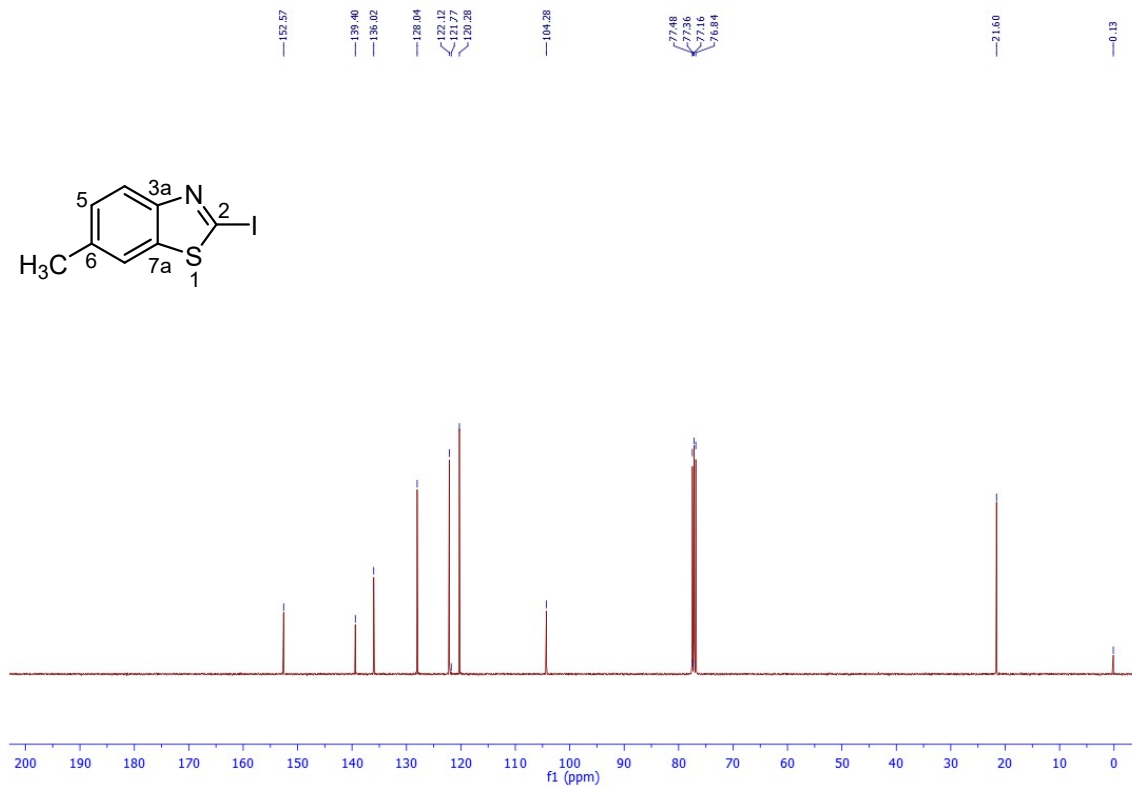

**<sup>1</sup>H NMR for 42 (400 MHz, CDCl<sub>3</sub>)**

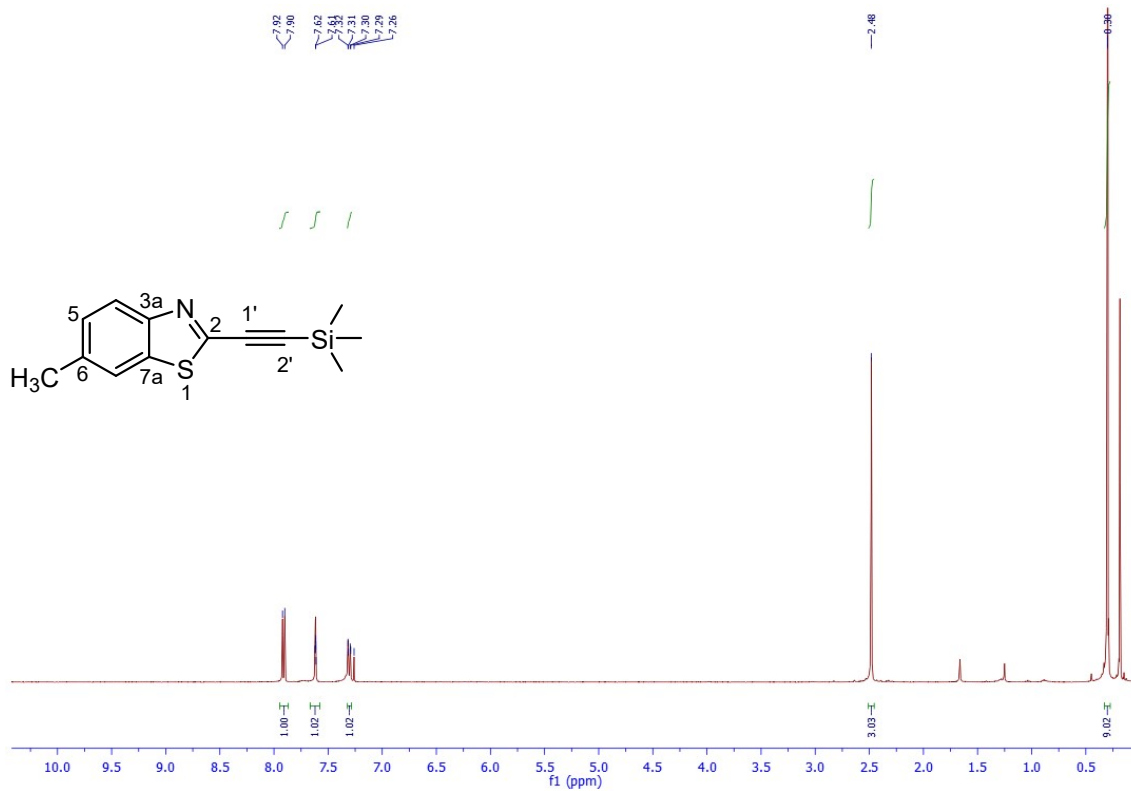

**<sup>13</sup>C NMR for 42 (400 MHz, CDCl<sub>3</sub>)**

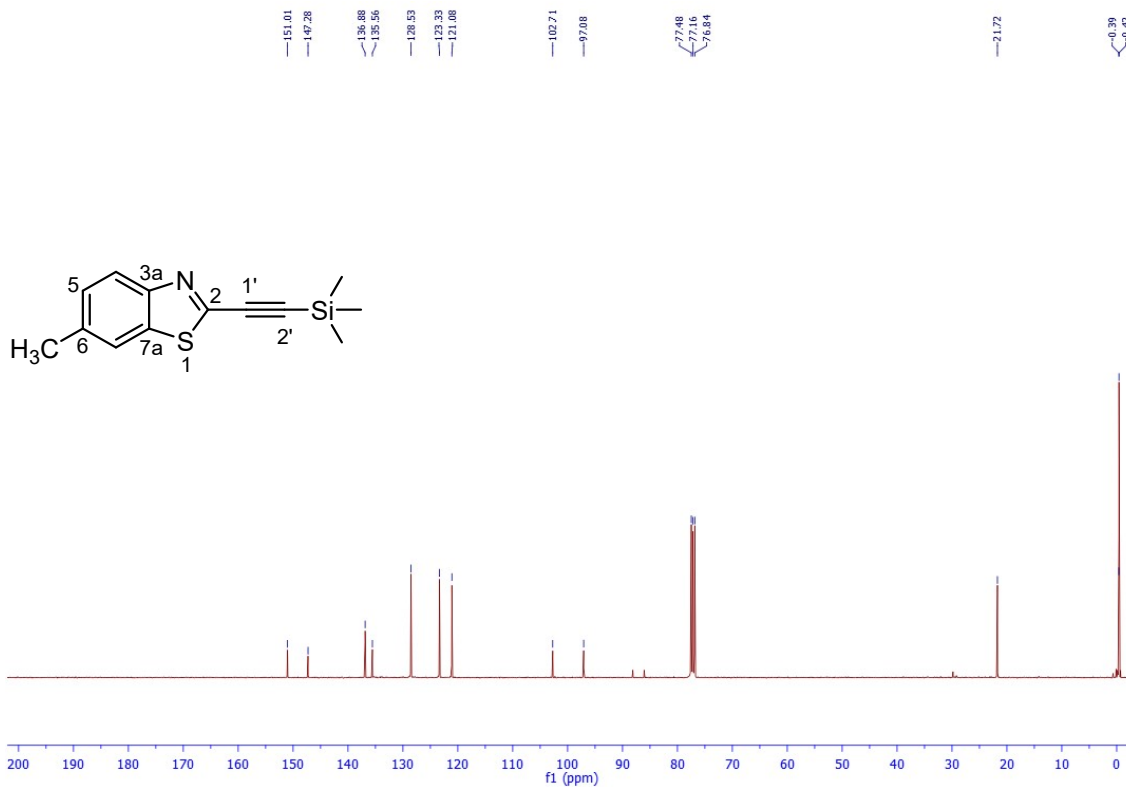

**<sup>1</sup>H NMR for 43 (400 MHz, CDCl<sub>3</sub>)**

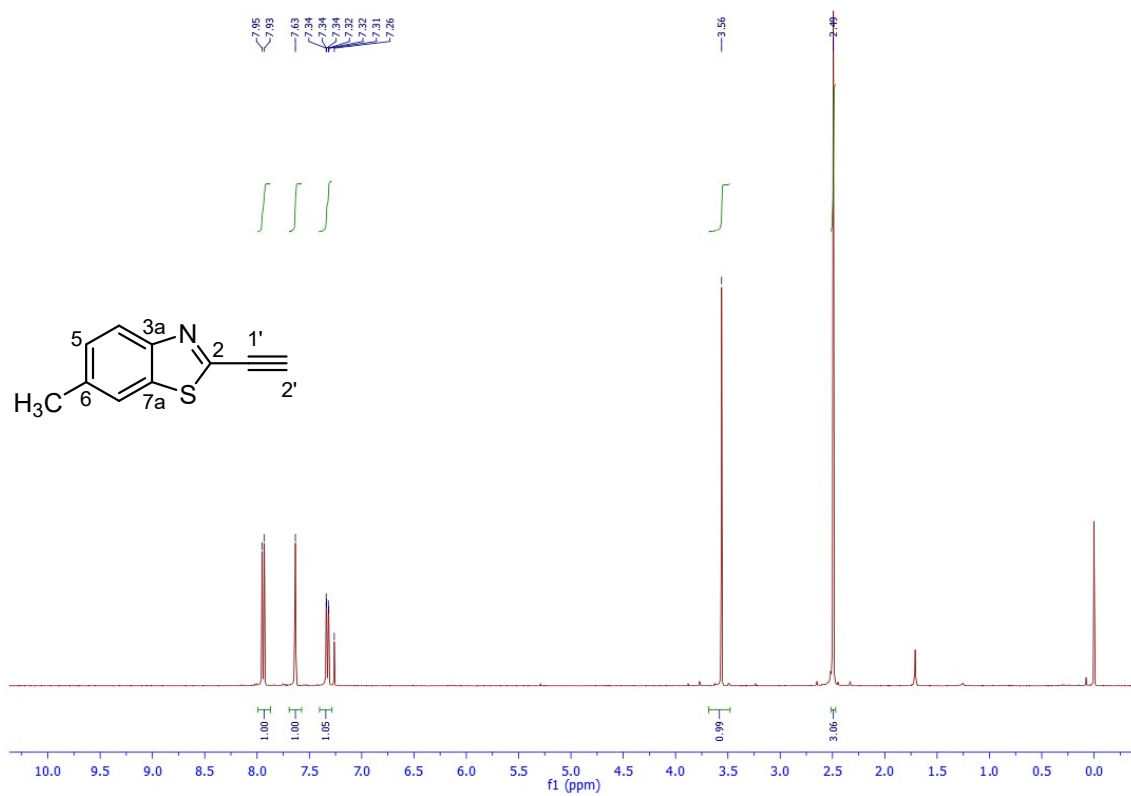

**<sup>13</sup>C NMR for 43 (400 MHz, CDCl<sub>3</sub>)**

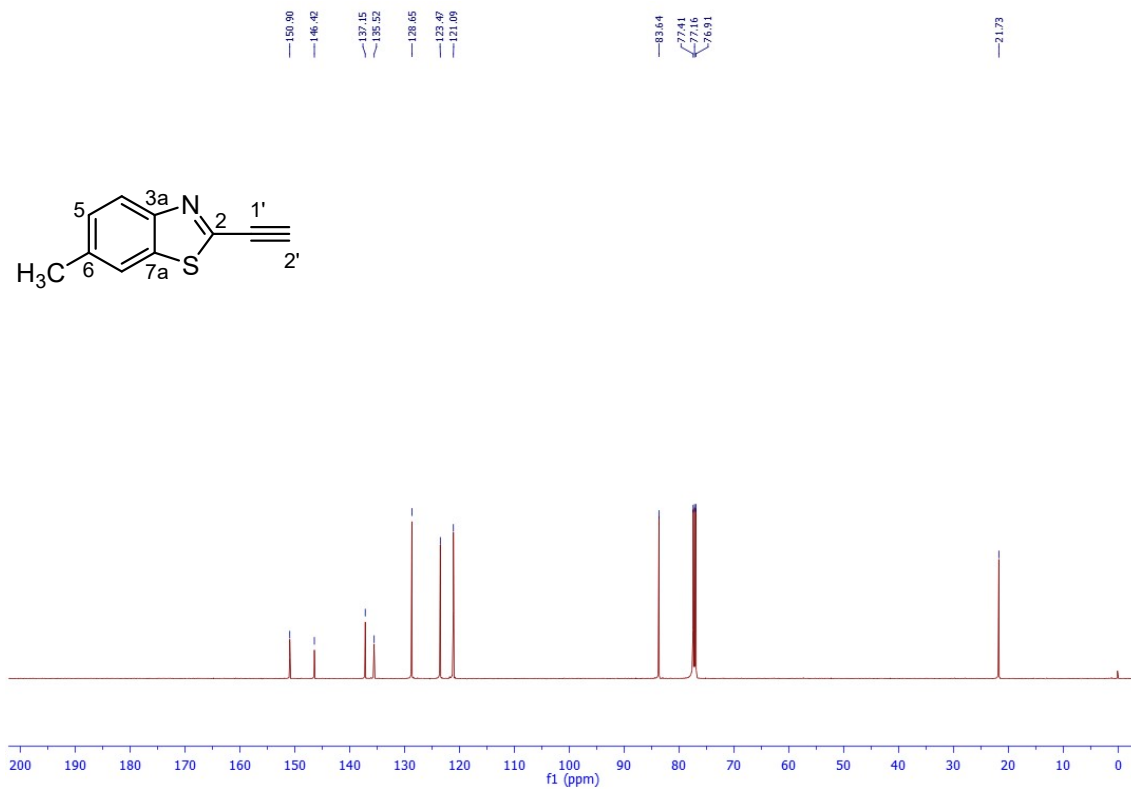

**<sup>1</sup>H NMR for 54 (400 MHz, CDCl<sub>3</sub>)**



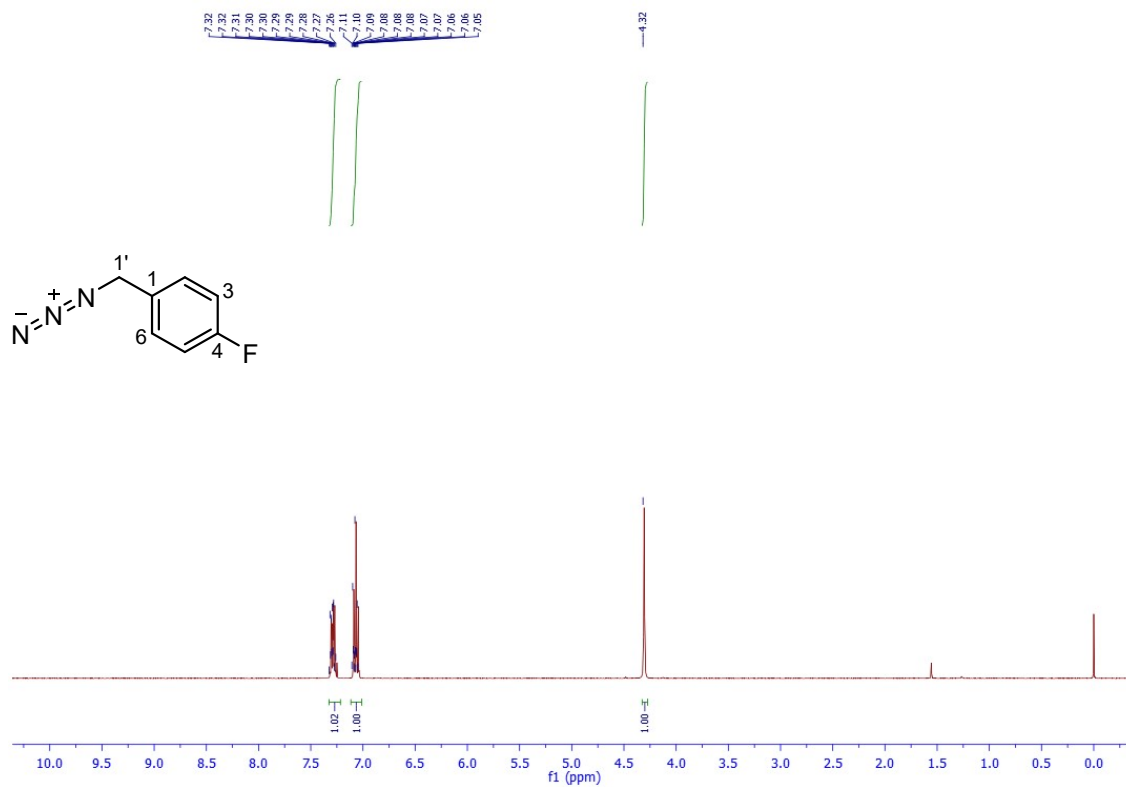

<sup>13</sup>C NMR for **54** (100 MHz, CDCl<sub>3</sub>)

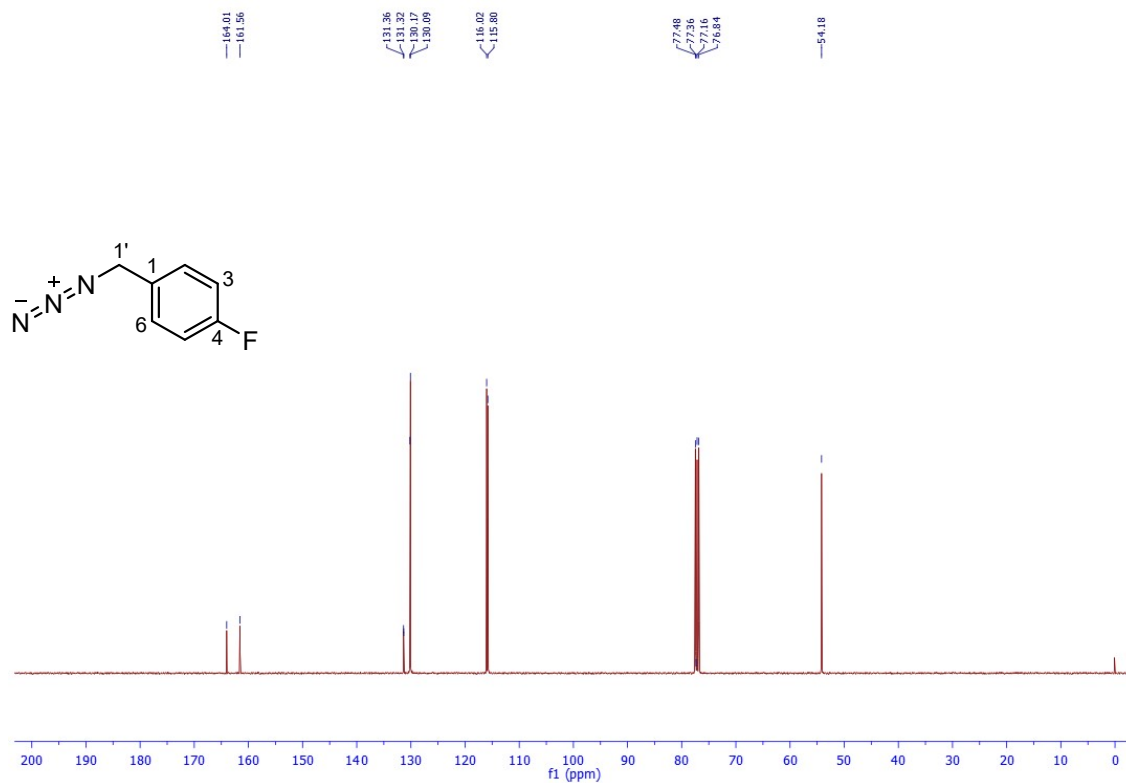

<sup>1</sup>H NMR for **55** (400 MHz, CDCl<sub>3</sub>)

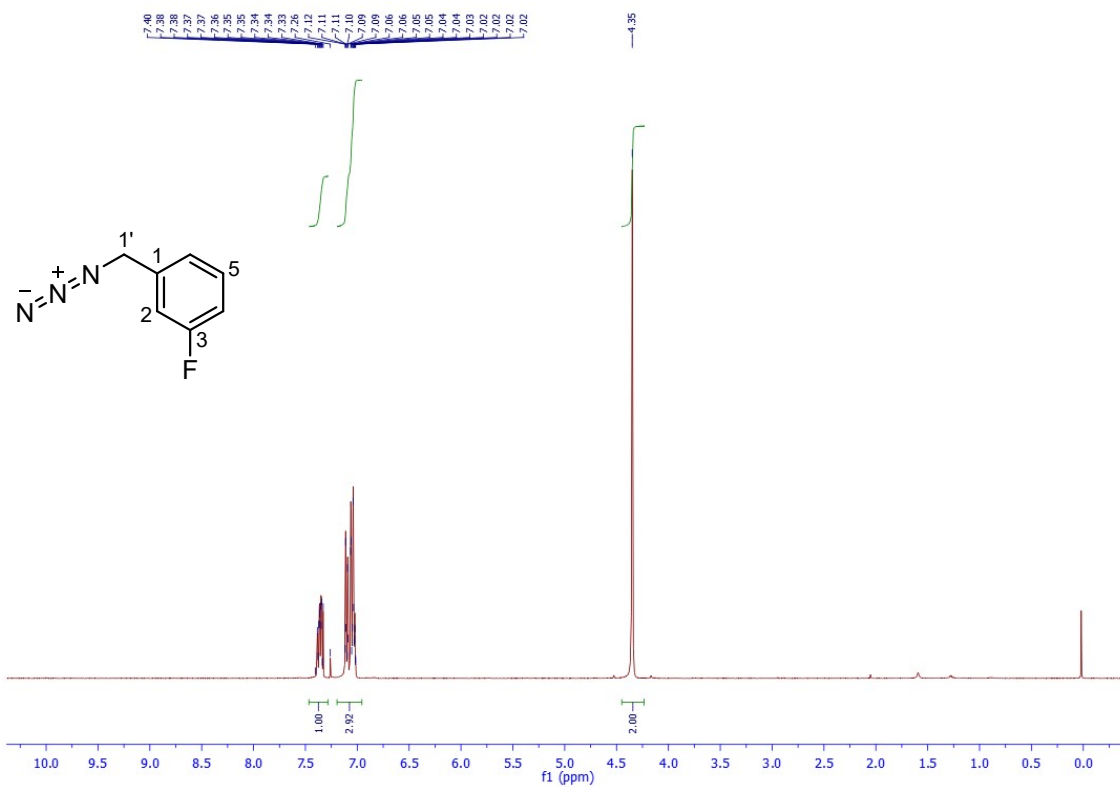

**<sup>13</sup>C NMR for 55 (100 MHz, CDCl<sub>3</sub>)**

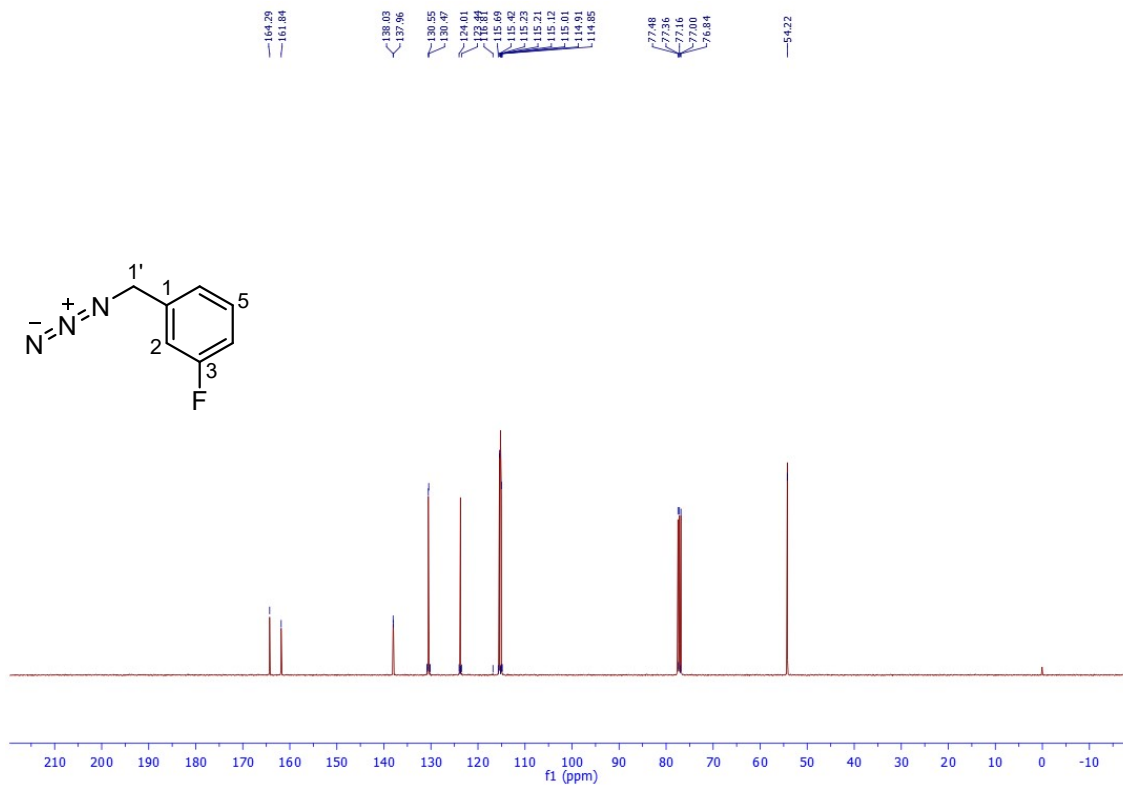

**<sup>1</sup>H NMR for 56 (400 MHz, CDCl<sub>3</sub>)**

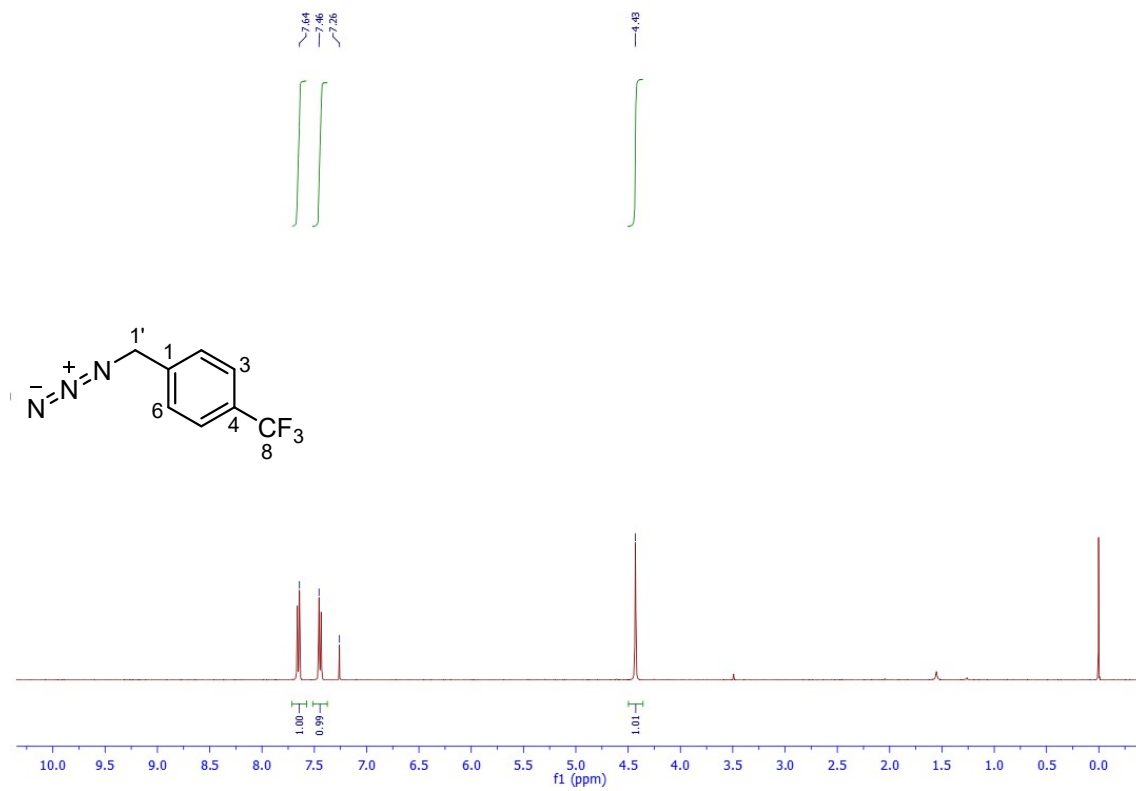

<sup>13</sup>C NMR for **56** (100 MHz, CDCl<sub>3</sub>)

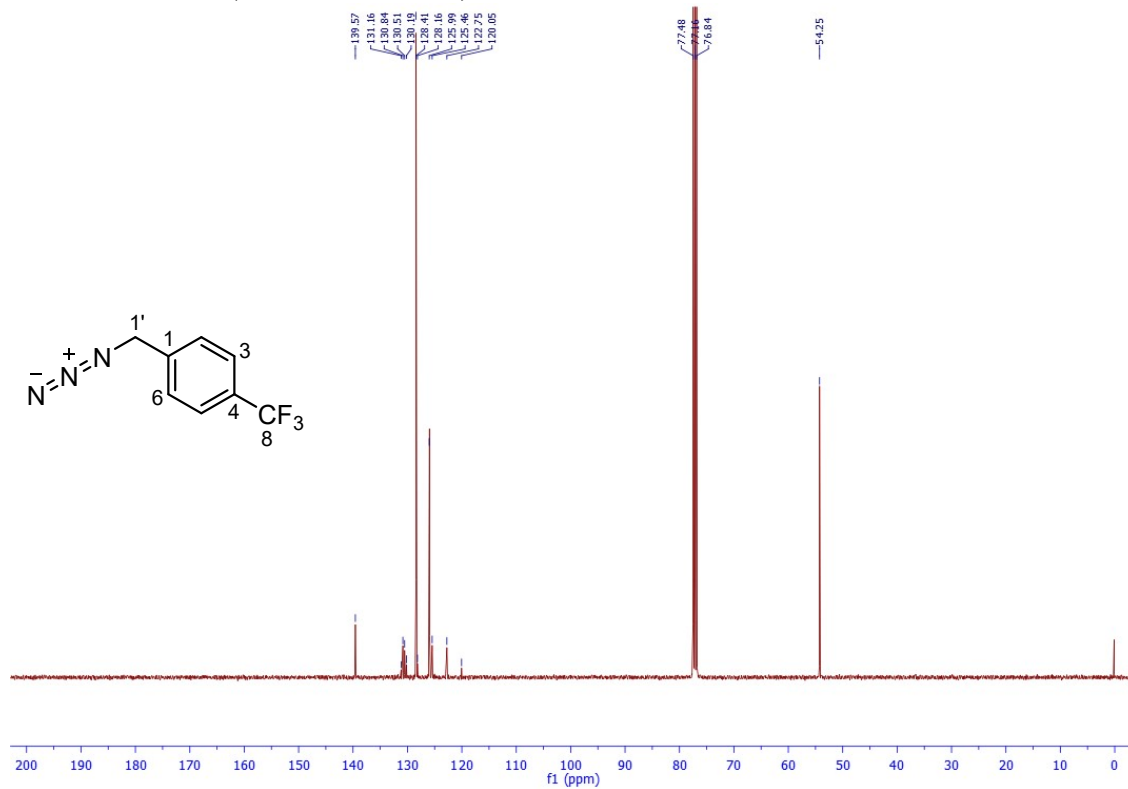

<sup>1</sup>H NMR for **57** (400 MHz, CDCl<sub>3</sub>)

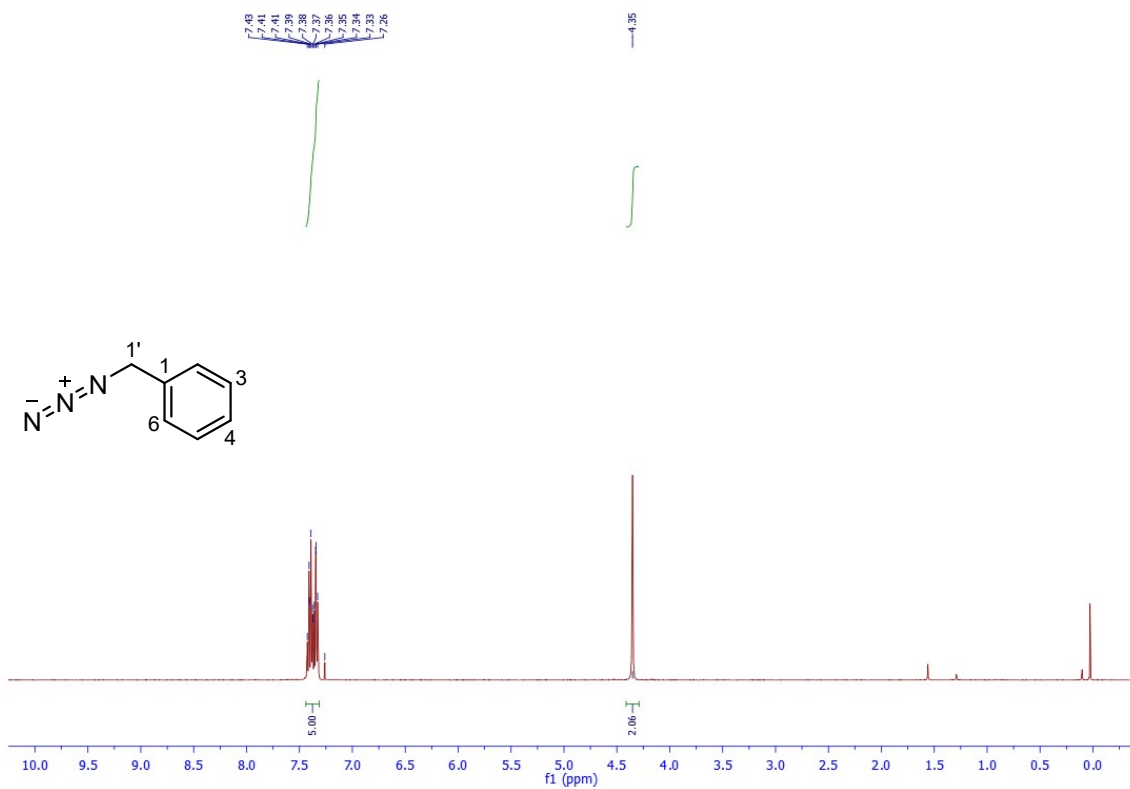

$^{13}\text{C}$  NMR for **57** (400 MHz,  $\text{CDCl}_3$ )

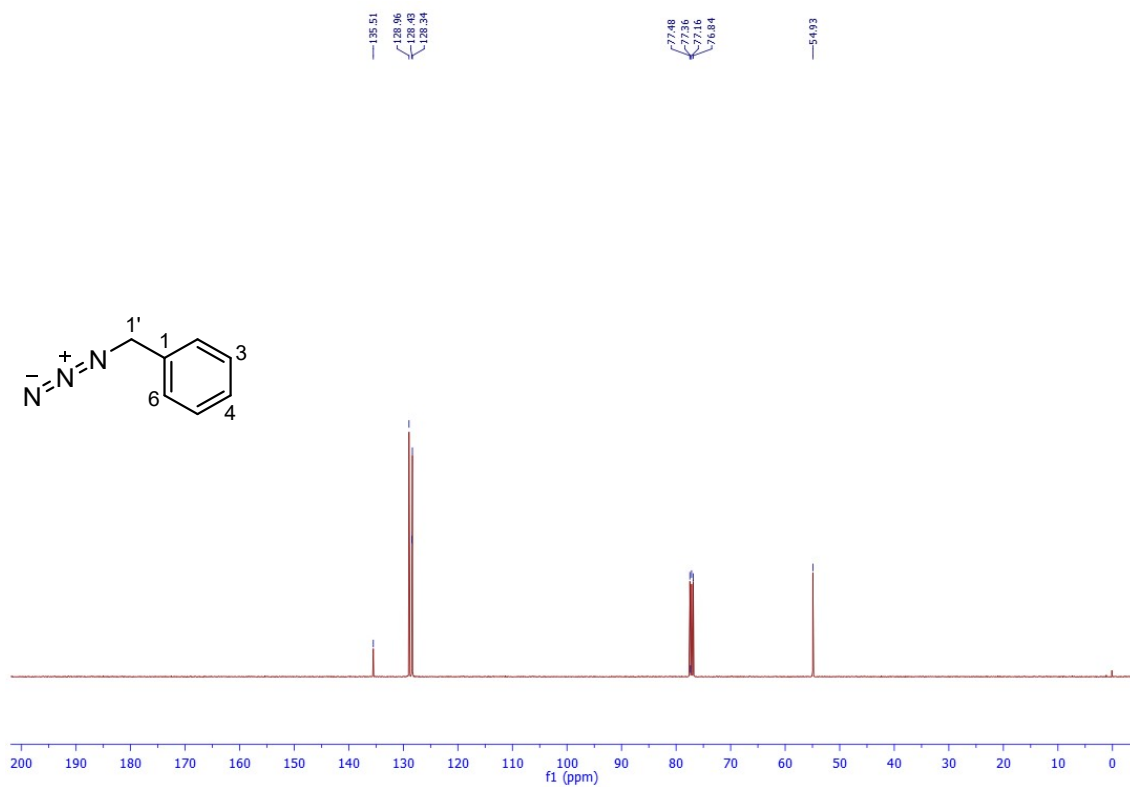

$^1\text{H}$  NMR for **58** (400 MHz,  $\text{CDCl}_3$ )

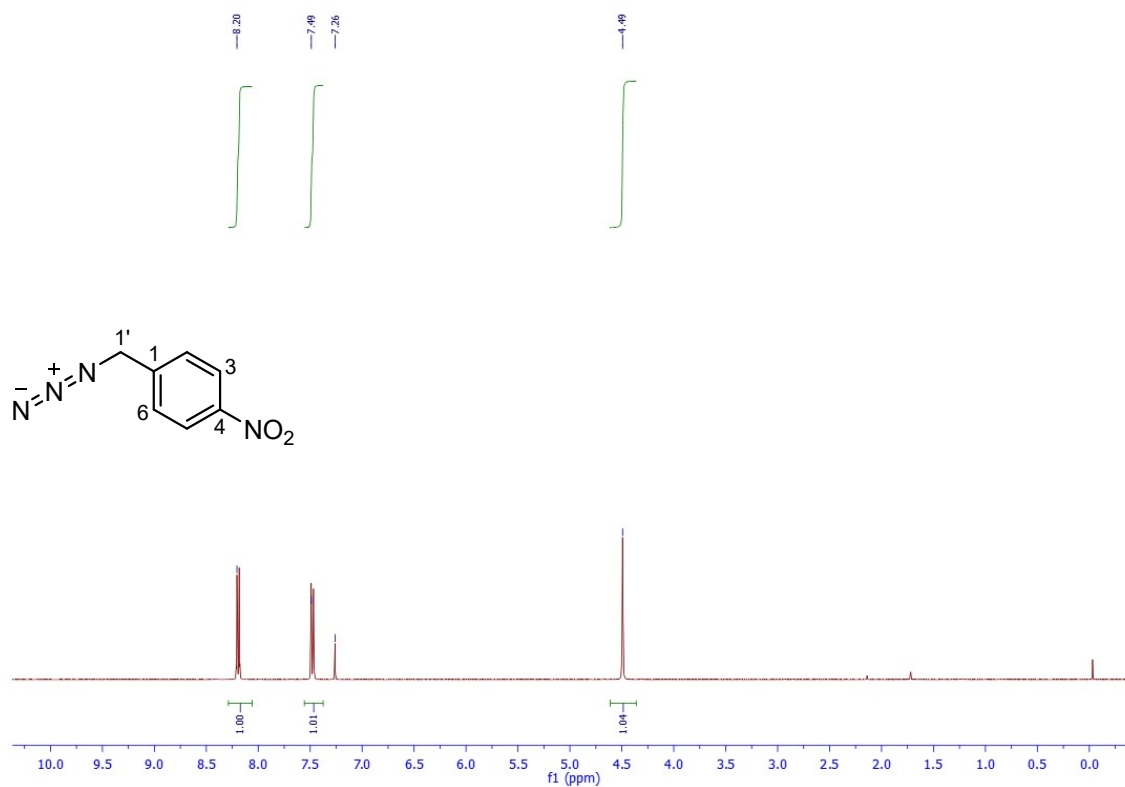

$^{13}\text{C}$  NMR for **58** (400 MHz, CDCl<sub>3</sub>)

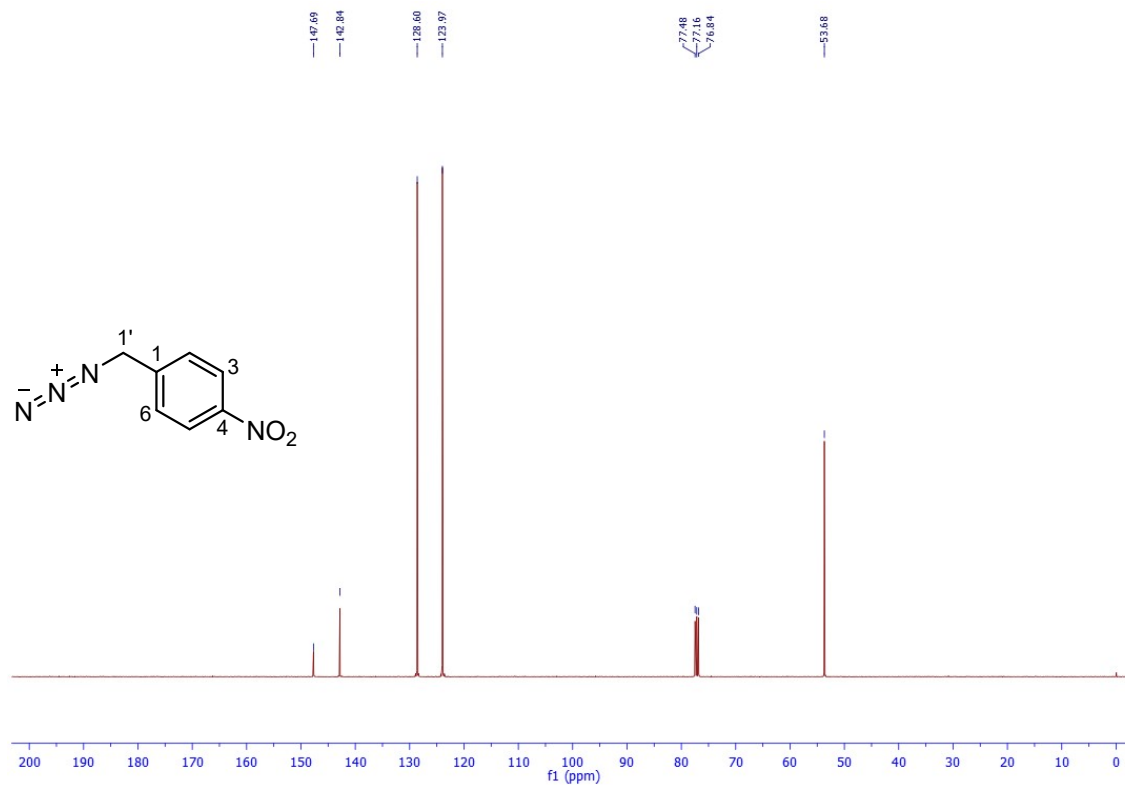

$^1\text{H}$  NMR for **59** (400 MHz, CDCl<sub>3</sub>)

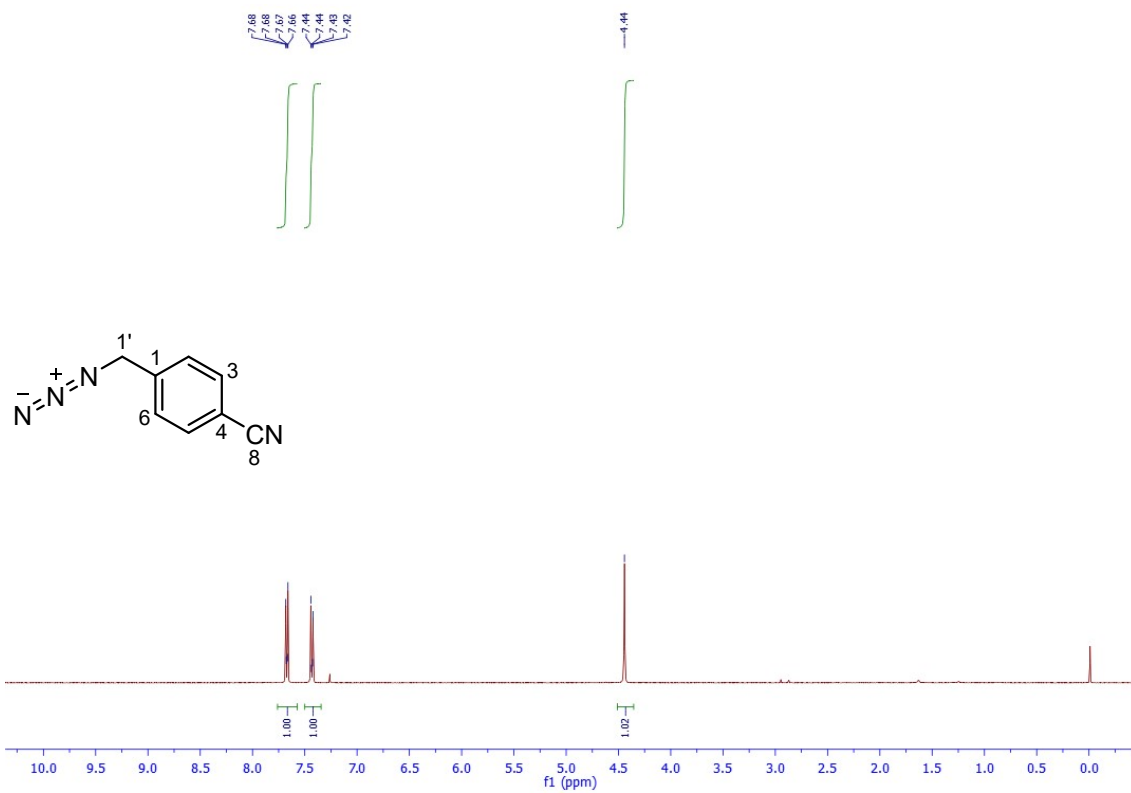

<sup>13</sup>C NMR for **59** (400 MHz, CDCl<sub>3</sub>)

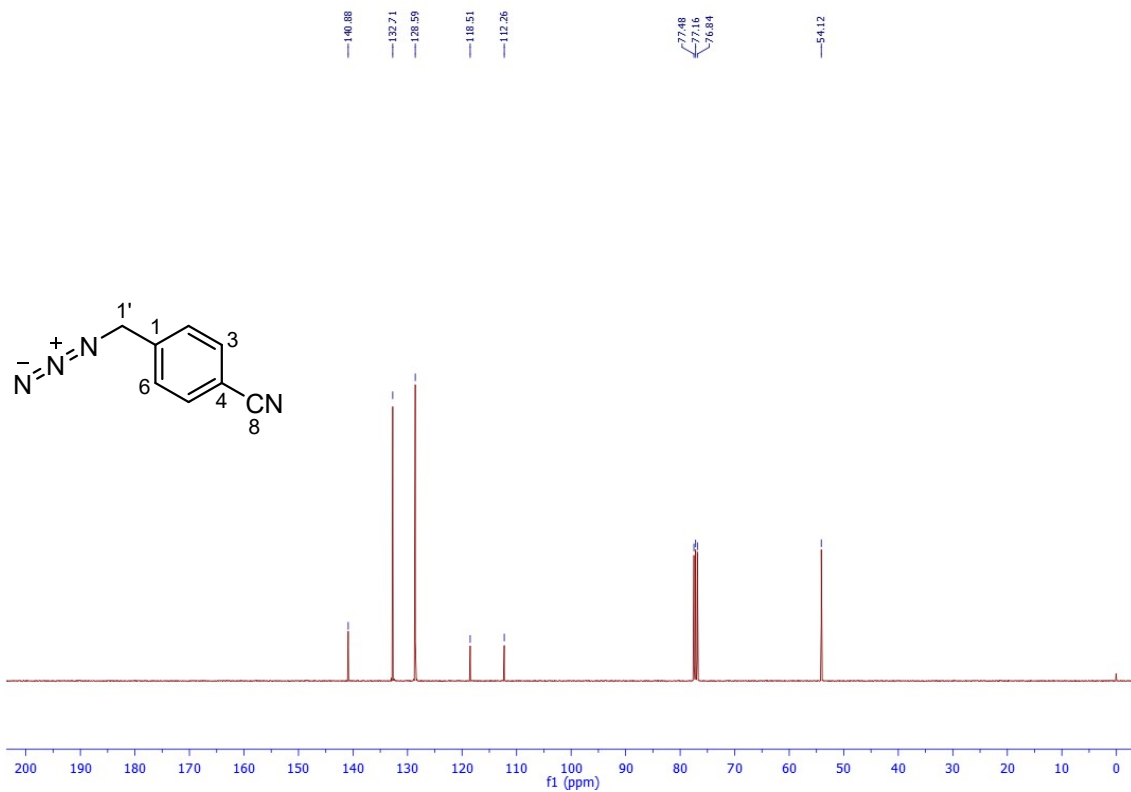

<sup>1</sup>H NMR for **60** (400 MHz, CDCl<sub>3</sub>)

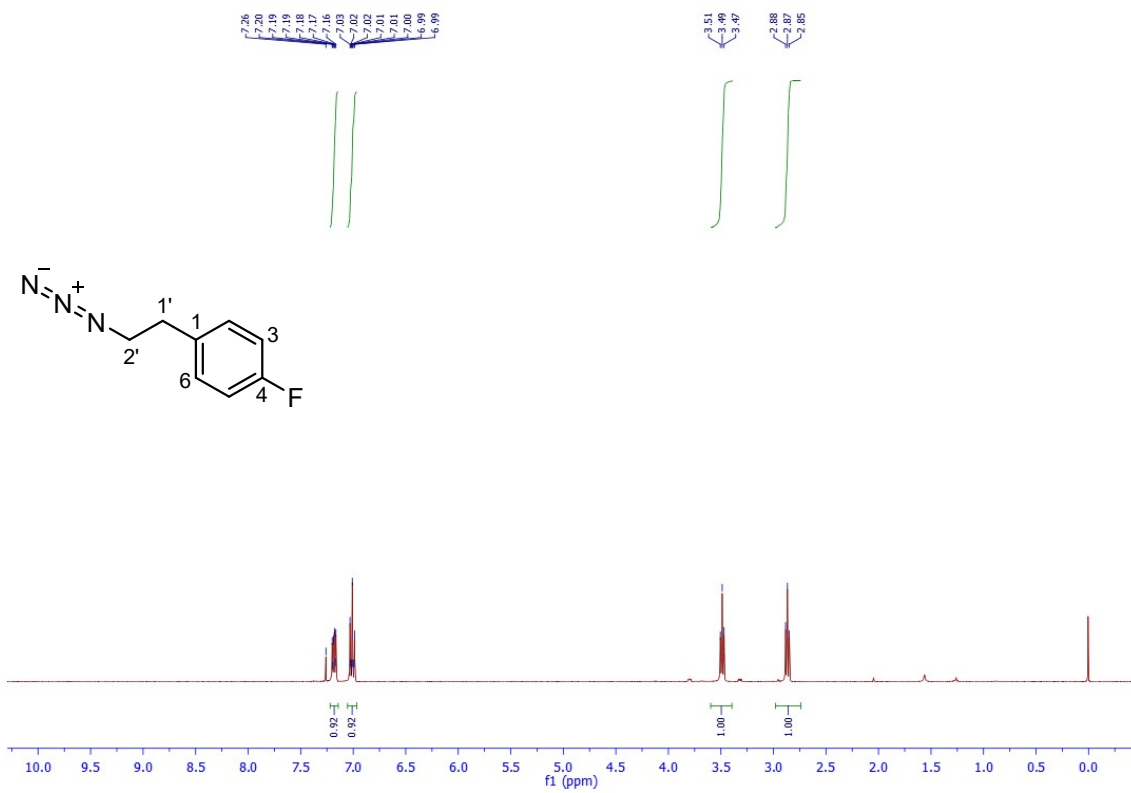

<sup>13</sup>C NMR for **60** (100 MHz, CDCl<sub>3</sub>)

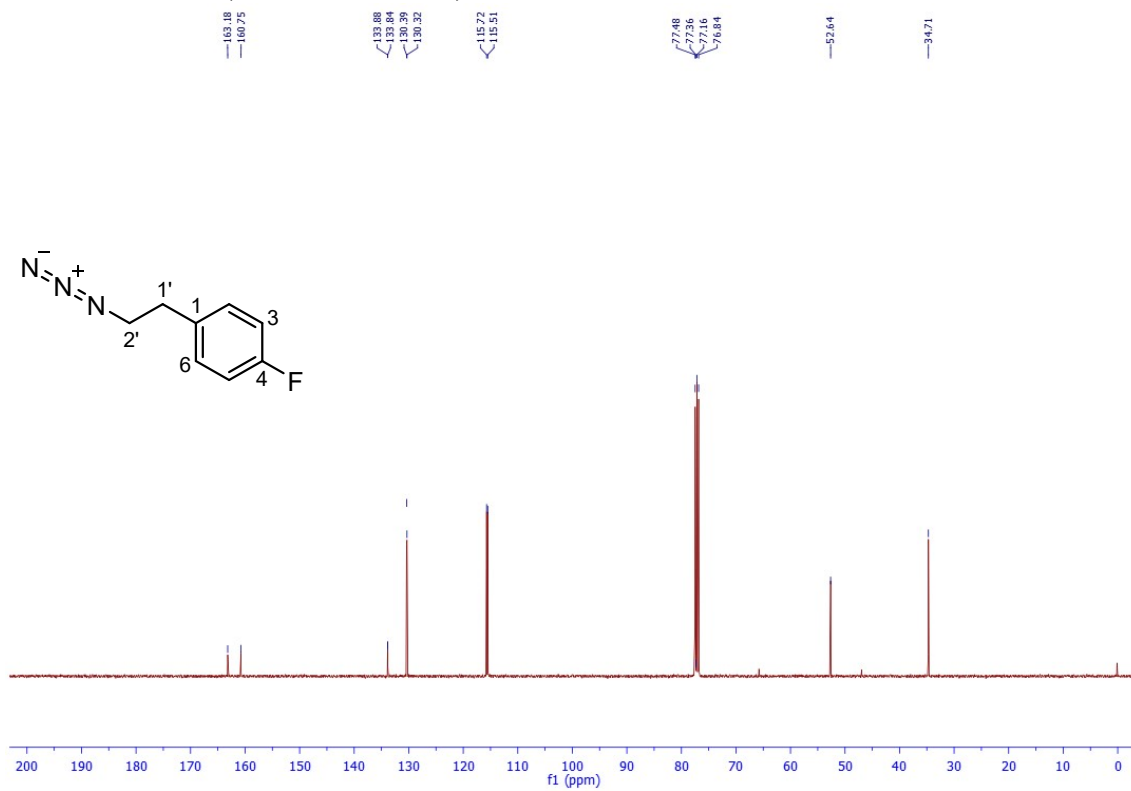

<sup>1</sup>H NMR for **61** (500 MHz, CDCl<sub>3</sub>)

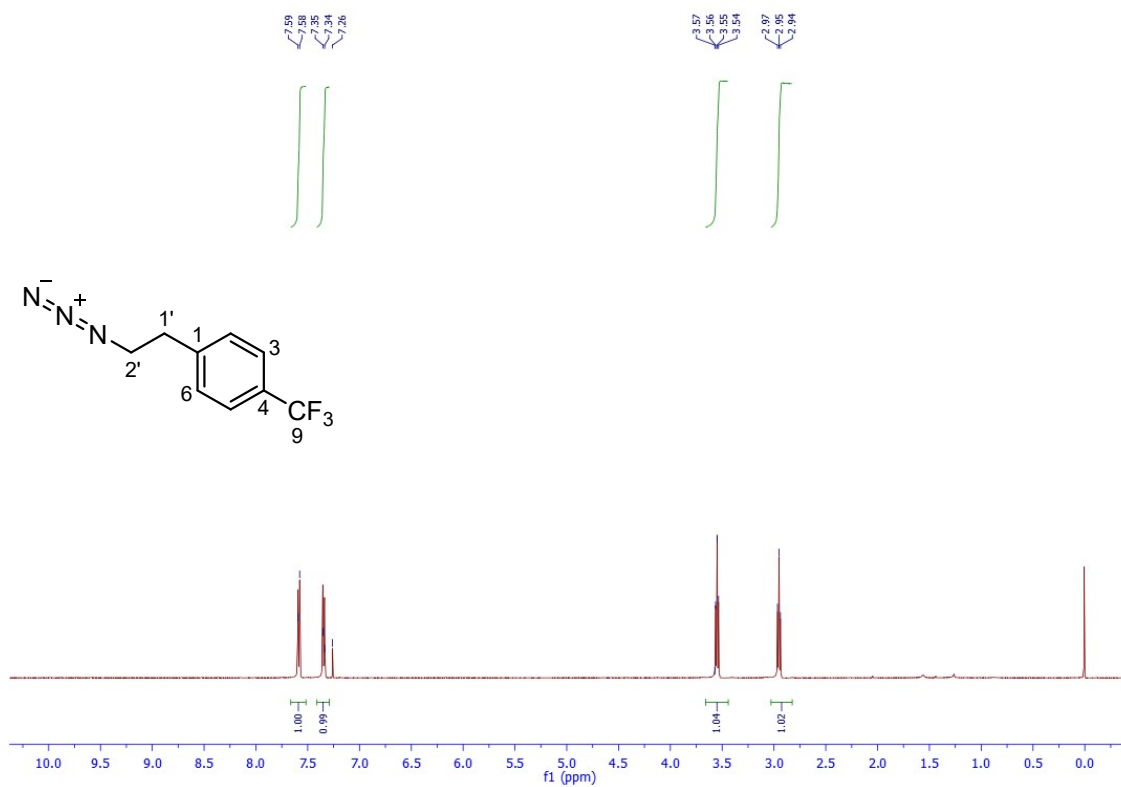

<sup>13</sup>C NMR for **61** (125 MHz, CDCl<sub>3</sub>)

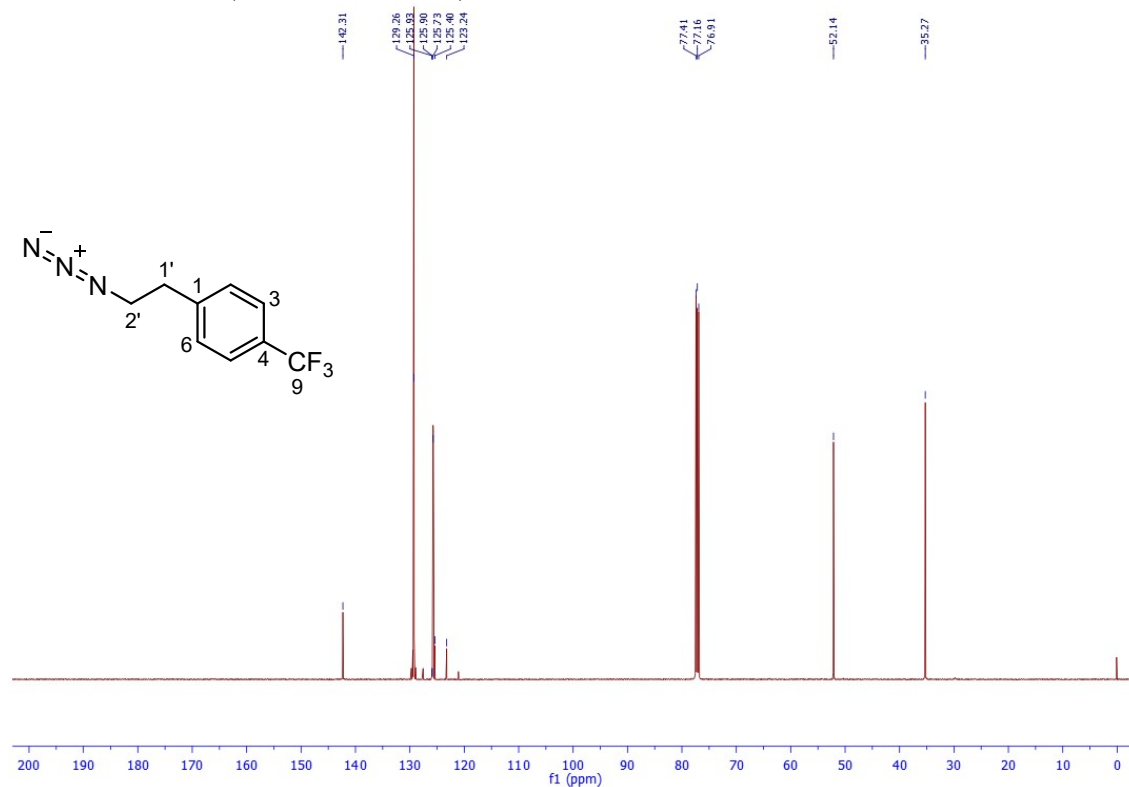

<sup>1</sup>H NMR for **62** (400 MHz, CDCl<sub>3</sub>)



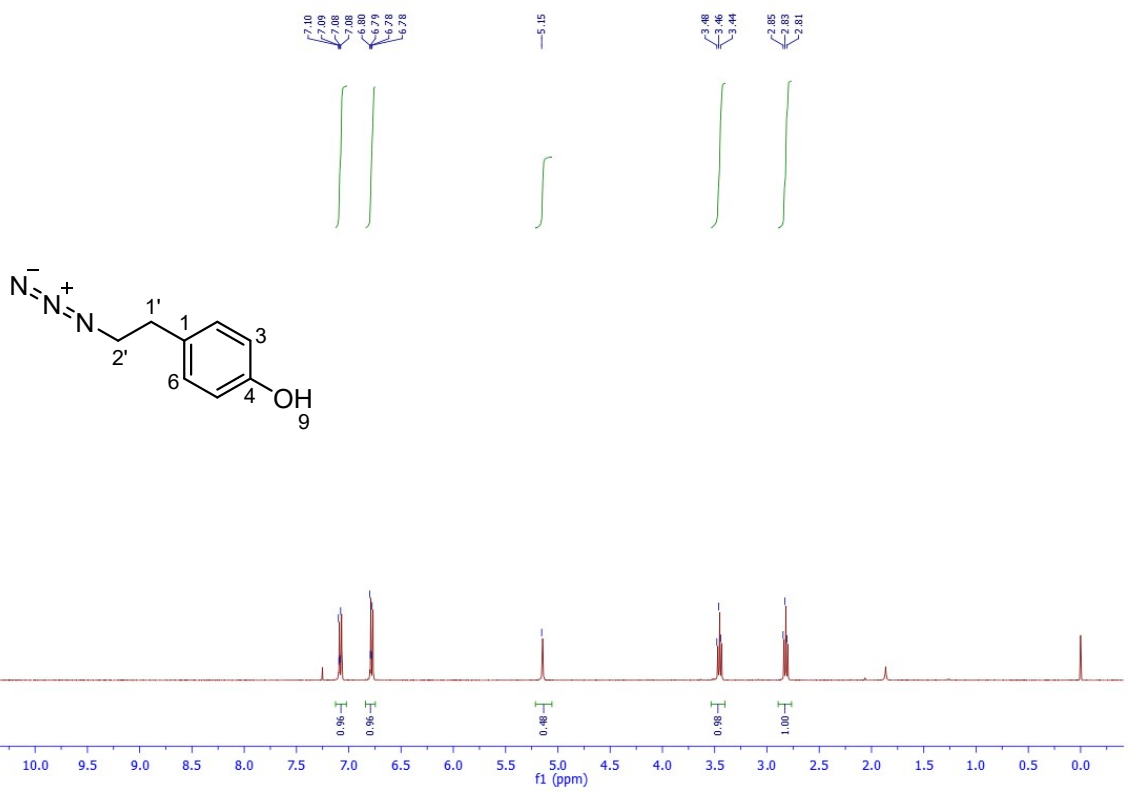

**<sup>13</sup>C NMR for 62 (400 MHz, CDCl<sub>3</sub>)**

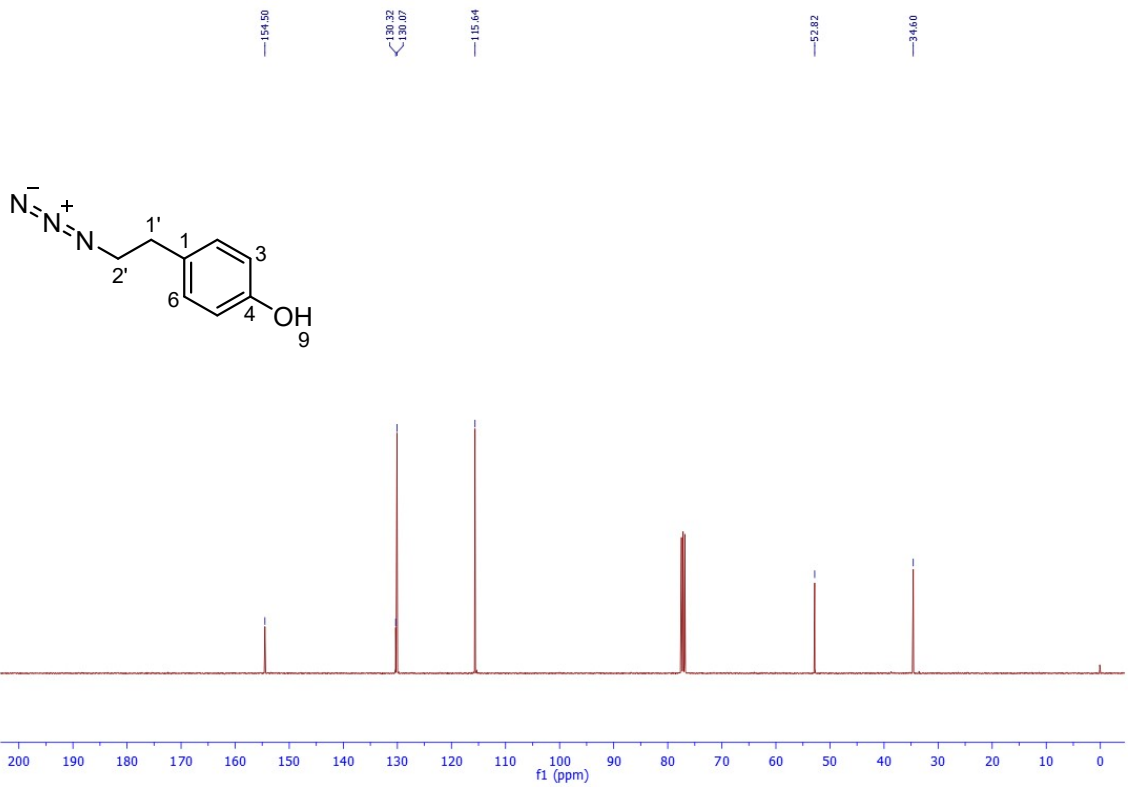

**<sup>1</sup>H NMR for 63 (400 MHz, CDCl<sub>3</sub>)**

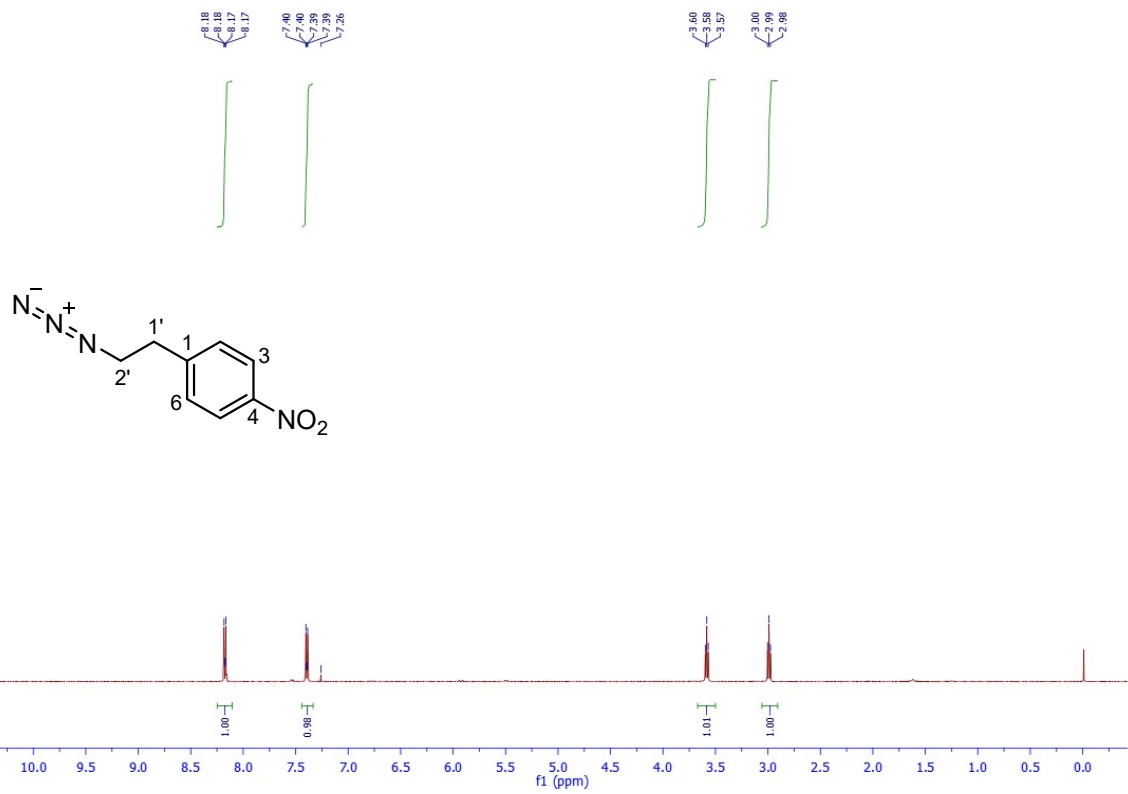

<sup>13</sup>C NMR for **63** (400 MHz, CDCl<sub>3</sub>)

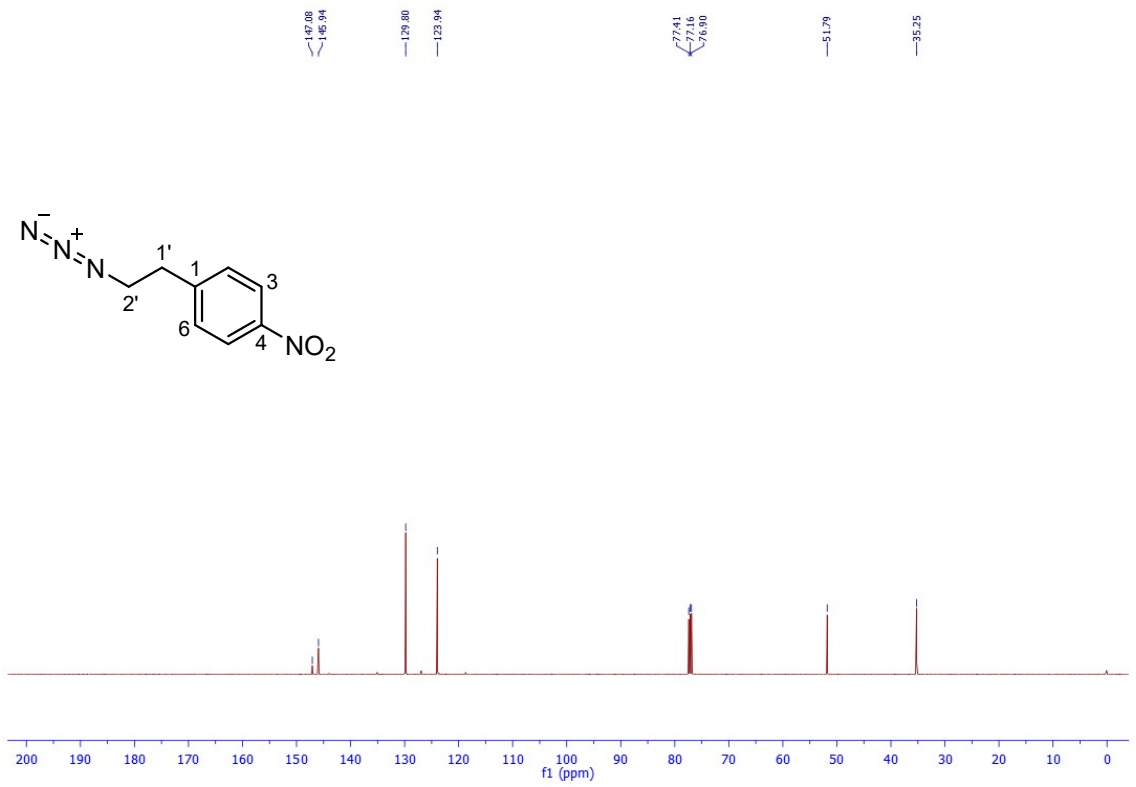

## 5. HRMS spectra of final compounds

### Compound 30

#### Elemental Composition Report

Page 1

#### Single Mass Analysis

Tolerance = 5.0 PPM / DBE: min = -1.5, max = 120.0

Element prediction: Off

Number of isotope peaks used for i-FIT = 3

Monoisotopic Mass, Even Electron Ions

1399 formula(e) evaluated with 8 results within limits (all results (up to 1000) for each mass)

Elements Used:

C: 9-35 H: 0-66 N: 0-10 O: 0-17 Na: 0-1 S: 0-1

Taus2-FL-R-NH2

PK HendrisW Taus2-FL-R-NH2 73 (1.754) Cm (73:75)

1: TOF MS ES+  
7.35e+003

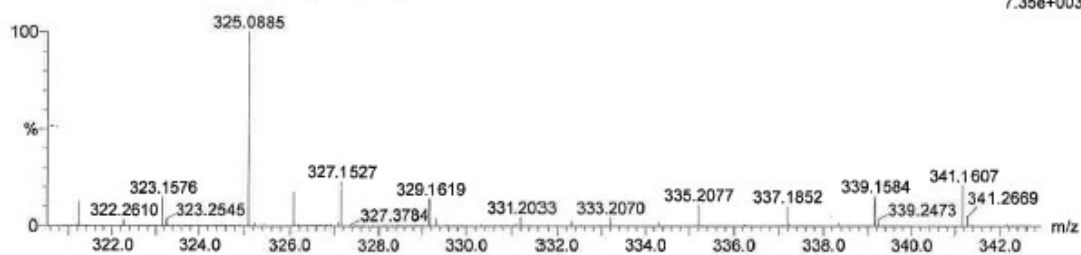

Minimum:

Maximum: 55.0 5.0 -1.5

Maximum:

120.0

| Mass     | Calc. Mass | mDa  | PPM  | DBE  | i-FIT | i-FIT (Norm) | Formula              |
|----------|------------|------|------|------|-------|--------------|----------------------|
| 325.0885 | 325.0886   | -0.1 | -0.3 | 10.5 | 192.4 | 0.9          | C10 H10 N10 O2<br>Na |
|          | 325.0883   | 0.2  | 0.6  | 3.5  | 194.9 | 3.5          | C10 H17 N2 O10       |
|          | 325.0874   | 1.1  | 3.4  | 8.5  | 195.9 | 4.4          | C17 H18 O3 Na<br>S   |
|          | 325.0873   | 1.2  | 3.7  | 5.5  | 194.7 | 3.2          | C9 H14 N6 O6<br>Na   |
|          | 325.0897   | -1.2 | -3.7 | 8.5  | 192.4 | 1.0          | C11 H13 N6 O6        |
|          | 325.0898   | -1.3 | -4.0 | 11.5 | 197.8 | 6.4          | C19 H17 O3 S         |
|          | 325.0872   | 1.3  | 4.0  | 12.5 | 195.7 | 4.2          | C15 H13 N6 O S ✓     |
|          | 325.0899   | -1.4 | -4.3 | 4.5  | 193.5 | 2.1          | C13 H18 O8 Na        |

# Compound 31

## Elemental Composition Report

Page 1

### Single Mass Analysis

Tolerance = 11.0 PPM / DBE: min = -1.5, max = 120.0<sup>o</sup>

Element prediction: Off

Number of isotope peaks used for i-FIT = 3

Monoisotopic Mass, Even Electron Ions

398 formula(e) evaluated with 7 results within limits (all results (up to 1000) for each mass)

Elements Used:

C: 0-25 H: 0-25 N: 0-10 O: 0-7 Na: 0-1 S: 1-1

Tau2.FL.OMe

PK HendrisW Tau2\_FL\_OMe 53 (1.275) AM2 (Ar,10000.0,0.00,0.00); ABS; Cm (52:53)

1: TOF MS ES+  
5.15e+003

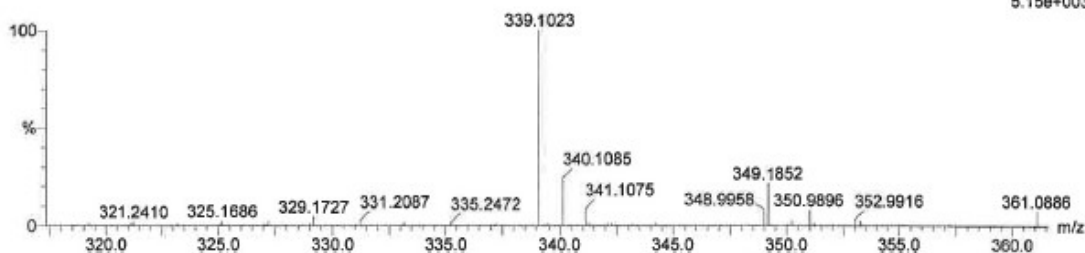

Minimum:

Maximum: 55.0 11.0 -1.5

120.0

| Mass     | Calc. Mass | mDa  | PPM  | DBE  | i-FIT | i-FIT (Norm) | Formula                       |
|----------|------------|------|------|------|-------|--------------|-------------------------------|
| 339.1023 | 339.1028   | -0.5 | -1.5 | 12.5 | 123.1 | 4.2          | C16 H15 N6 O S <sup>+</sup> ✓ |
|          | 339.1031   | -0.8 | -2.4 | 8.5  | 121.8 | 2.9          | C18 H20 O3 Na                 |
|          | 339.1015   | 0.8  | 2.4  | 7.5  | 124.2 | 5.3          | S<br>C15 H19 N2 O5            |
|          | 339.1004   | 1.9  | 5.6  | 9.5  | 125.2 | 6.4          | S<br>C14 H16 N6 O             |
|          | 339.1055   | -3.2 | -9.4 | 11.5 | 119.0 | 0.1          | Na S<br>C20 H19 O3 S          |
|          | 339.0991   | 3.2  | 9.4  | 4.5  | 126.2 | 7.3          | C13 H20 N2 O5                 |
|          | 339.0988   | 3.5  | 10.3 | 8.5  | 127.0 | 8.1          | Na S<br>C11 H15 N8 O3         |
|          |            |      |      |      |       |              | S                             |

Compound 32

SPECTRUM - simulation :

| m/z       | Theo. Mass | Delta (mmu) | RDB equiv.         | Composition |
|-----------|------------|-------------|--------------------|-------------|
| 325.08653 | 325.08661  | -0.08       | C15 H13 O N6 S     |             |
| 325.08620 |            | 0.33        | C23 H12 N Na       |             |
| 325.08689 |            | -0.36       | C17 H18 O3 Na S    |             |
| 325.08592 |            | 0.61        | C22 H13 O3         |             |
| 325.08554 |            | 0.99        | C15 H16 O2 N3 Na S |             |
| 325.08527 |            | 1.26        | C14 H17 O5 N2 S    |             |
| 325.08795 |            | -1.42       | C17 H15 O2 N3 S    |             |

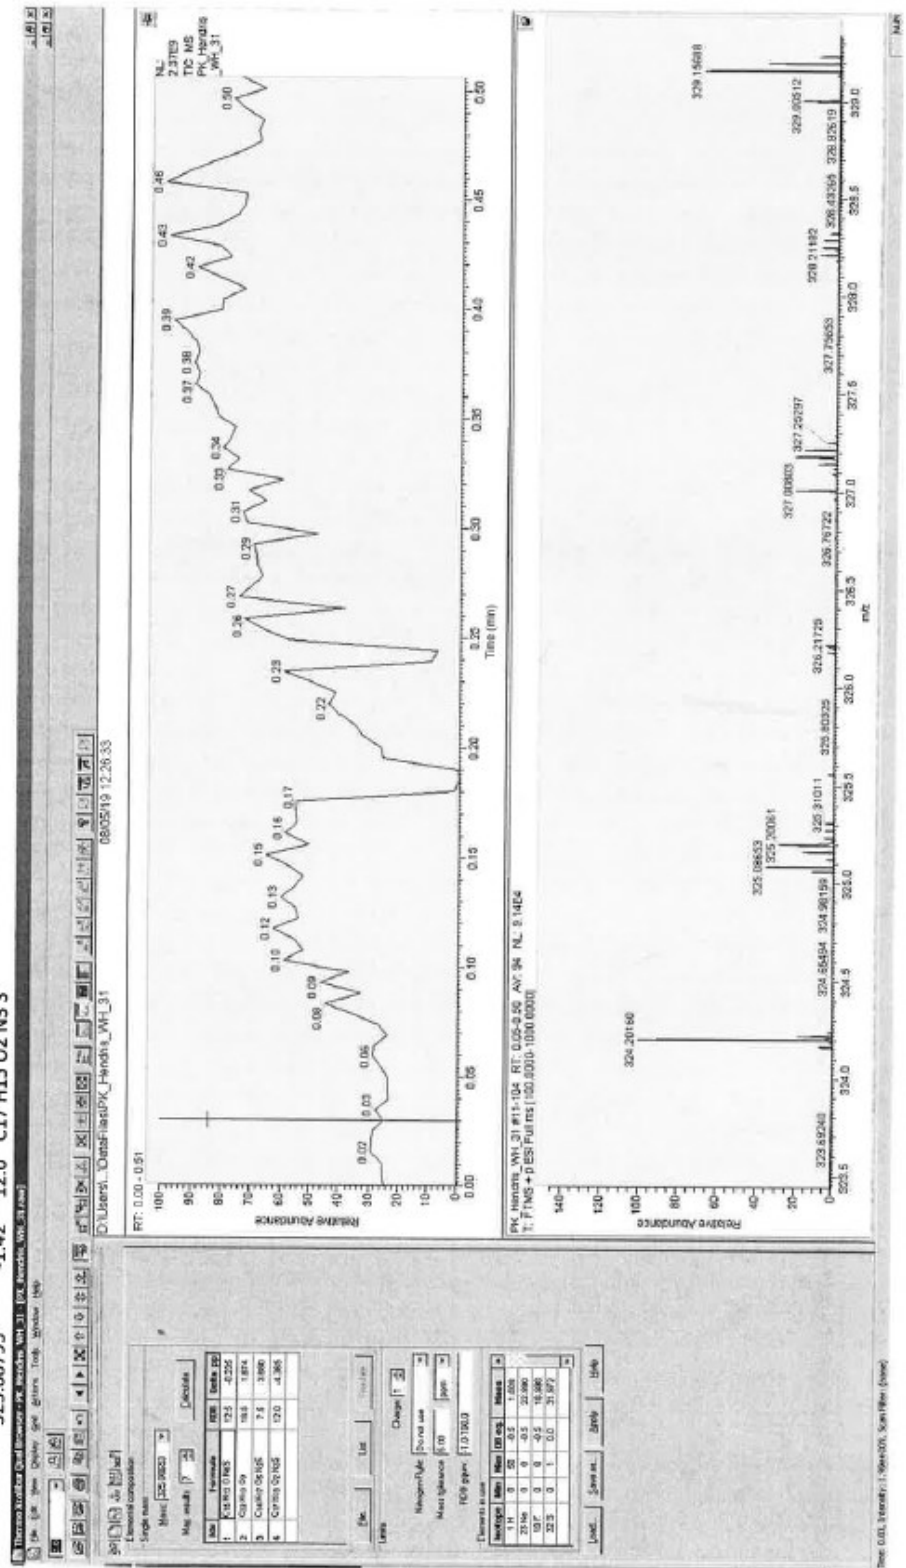

# Compound 64

## Elemental Composition Report

Page 1

### Single Mass Analysis

Tolerance = 6.0 PPM / DBE: min = -1.5, max = 120.0

Element prediction: Off

Number of isotope peaks used for i-FIT = 3

Monoisotopic Mass, Even Electron Ions

2323 formula(e) evaluated with 12 results within limits (up to 20 closest results for each mass)

Elements Used:

C: 11-44 H: 0-99 N: 0-11 O: 0-11 F: 0-3 S: 0-1

WH-12 Tau

PK Hendris WH-12 Tau 37 (0.904) Cm (37:38)

1: TOF MS ES+  
7.13e+002

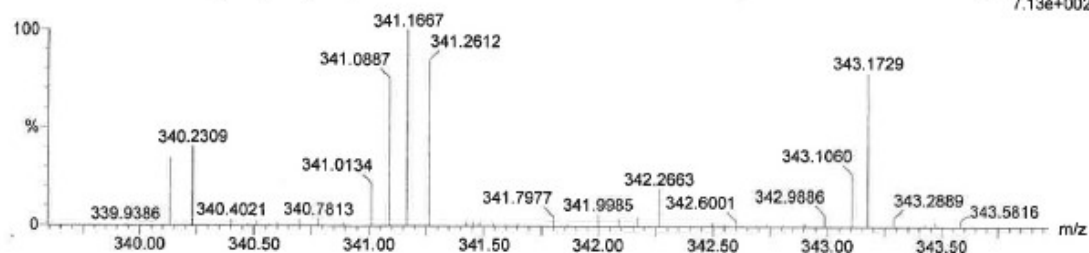

Minimum:

Maximum: 55.0 6.0 -1.5

| Mass     | Calc. Mass | mDa  | PPM  | DBE  | i-FIT | i-FIT (Norm) | Formula        |
|----------|------------|------|------|------|-------|--------------|----------------|
| 341.0887 | 341.0886   | 0.1  | 0.3  | 12.5 | 195.2 | 2.3          | C16 H13 N4 O5  |
|          | 341.0884   | 0.3  | 0.9  | 3.5  | 194.7 | 1.8          | C12 H18 O10 F  |
|          | 341.0890   | -0.3 | -0.9 | 17.5 | 195.2 | 2.3          | C22 H11 N2 F2  |
|          | 341.0884   | 0.3  | 0.9  | 8.5  | 196.6 | 3.7          | C14 H15 N4 O2  |
|          |            |      |      |      |       |              | F2 S           |
|          | 341.0895   | -0.8 | -2.3 | 4.5  | 196.1 | 3.3          | C11 H16 N4 O3  |
|          |            |      |      |      |       |              | F3 S           |
|          | 341.0897   | -1.0 | -2.9 | 8.5  | 194.8 | 1.9          | C13 H14 N4 O6  |
|          |            |      |      |      |       |              | F              |
|          | 341.0899   | -1.2 | -3.5 | 17.5 | 195.3 | 2.4          | C17 H9 N8 O    |
|          | 341.0873   | 1.4  | 4.1  | 7.5  | 195.2 | 2.3          | C15 H17 O9     |
|          | 341.0872   | 1.5  | 4.4  | 12.5 | 197.0 | 4.1          | C17 H14 N4 O F |
|          |            |      |      |      |       |              | S              |
|          | 341.0902   | -1.5 | -4.4 | 13.5 | 194.9 | 2.0          | C19 H12 N2 O   |
|          |            |      |      |      |       |              | F3             |
|          | 341.0870   | 1.7  | 5.0  | 3.5  | 196.3 | 3.5          | C13 H19 O6 F2  |
|          |            |      |      |      |       |              | S              |
|          | 341.0906   | -1.9 | -5.6 | 2.5  | 195.7 | 2.8          | C12 H21 O9 S   |

# Compound 65

## Elemental Composition Report

Page 1

### Single Mass Analysis

Tolerance = 5.0 PPM / DBE: min = -1.5, max = 120.0

Element prediction: Off

Number of isotope peaks used for i-FIT = 3

Monoisotopic Mass, Even Electron Ions

2591 formula(e) evaluated with 10 results within limits (up to 20 closest results for each mass)

Elements Used:

C: 11-44 H: 0-99 N: 0-11 O: 0-11 F: 0-3 S: 0-1

WH-20 Tau

PK Hendris WH-20 Tau 39 (0.936) Cm (39:44)

1: TOF MS ES+  
1.02e+004

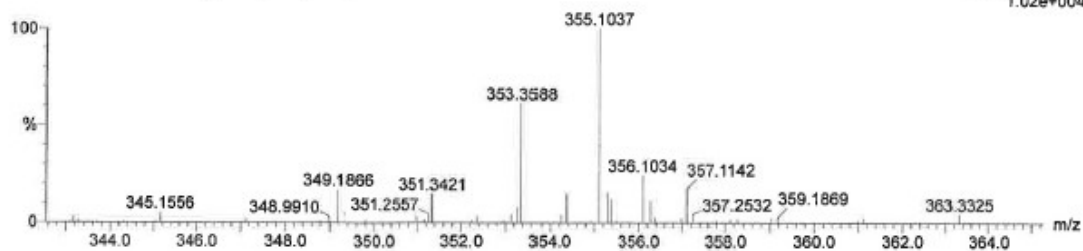

| Mass     | Calc. Mass | mDa  | PPM  | DBE  | i-FIT | i-FIT (Norm) | Formula                    |
|----------|------------|------|------|------|-------|--------------|----------------------------|
| 355.1037 | 355.1038   | -0.1 | -0.3 | -0.5 | 270.5 | 3.9          | C11 H22 O7 F3              |
|          | 355.1040   | -0.3 | -0.8 | 8.5  | 269.7 | 3.1          | S<br>C15 H17 N4 O2         |
|          | 355.1041   | -0.4 | -1.1 | 3.5  | 269.0 | 2.4          | F2 S<br>C13 H20 O10 F      |
|          | 355.1042   | -0.5 | -1.4 | 12.5 | 268.3 | 1.7          | C17 H15 N4 O5              |
|          | 355.1029   | 0.8  | 2.3  | 7.5  | 268.5 | 1.9          | C16 H19 O9                 |
|          | 355.1029   | 0.8  | 2.3  | 12.5 | 269.2 | 2.7          | C18 H16 N4 O F<br>S        |
|          | 355.1047   | -1.0 | -2.8 | 17.5 | 267.9 | 1.3          | C23 H13 N2 F2              |
|          | 355.1027   | 1.0  | 2.8  | 3.5  | 269.9 | 3.3          | C14 H21 O6 F2<br>S         |
|          | 355.1052   | -1.5 | -4.2 | 4.5  | 270.3 | 3.7          | C12 H18 N4 O3              |
|          | 355.1054   | -1.7 | -4.8 | 8.5  | 268.8 | 2.2          | F3 S<br>C14 H16 N4 O6<br>F |

## Elemental Composition Report

## Single Mass Analysis

Tolerance = 4.0 PPM / DBE: min = -1.5, max = 120.0

Element prediction: Off

Number of isotope peaks used for i-FIT = 3

Monoisotopic Mass, Even Electron Ions

2323 formula(e) evaluated with 8 results within limits (up to 20 closest results for each mass)

Elements Used:

C: 11-44 H: 0-99 N: 0-11 O: 0-11 F: 0-3 S: 0-1

WH-21 Tau

PK Hendris WH-21 Tau 124 (2.958) Cm (124:126)

1: TOF MS ES+  
2.70e+002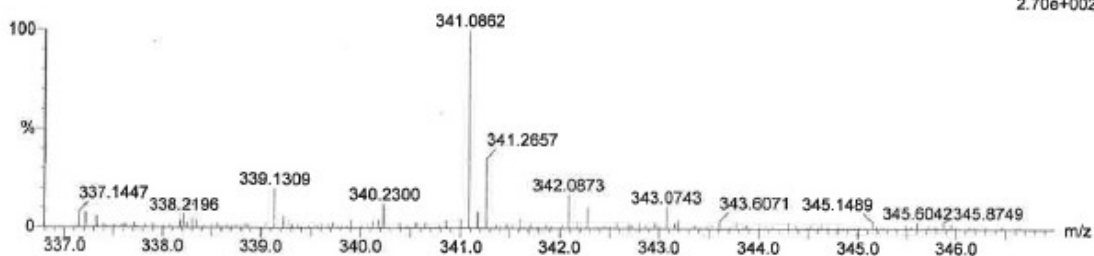

| Mass     | Calc. Mass | mDa  | PPM  | DBE  | i-FIT | i-FIT (Norm) | Formula             |
|----------|------------|------|------|------|-------|--------------|---------------------|
| 341.0862 | 341.0862   | 0.0  | 0.0  | 9.5  | 133.3 | 5.1          | C14 H12 N4 O3<br>F3 |
|          | 341.0861   | 0.1  | 0.3  | 16.5 | 130.6 | 2.4          | C20 H13 N4 S        |
|          | 341.0859   | 0.3  | 0.9  | 7.5  | 129.0 | 0.8          | C16 H18 O5 F S      |
|          | 341.0859   | 0.3  | 0.9  | 13.5 | 132.9 | 4.7          | C12 H9 N10 O3       |
|          | 341.0870   | -0.8 | -2.3 | 3.5  | 129.4 | 1.2          | C13 H19 O6 F2<br>S  |
|          | 341.0872   | -1.0 | -2.9 | 12.5 | 130.2 | 2.0          | C17 H14 N4 O F<br>S |
|          | 341.0873   | -1.1 | -3.2 | 7.5  | 133.0 | 4.9          | C15 H17 O9          |
|          | 341.0850   | 1.2  | 3.5  | 13.5 | 133.2 | 5.0          | C17 H11 N4 O2<br>F2 |



## Elemental Composition Report

## Single Mass Analysis

Tolerance = 4.0 PPM / DBE: min = -1.5, max = 120.0

Element prediction: Off

Number of isotope peaks used for i-FIT = 3

Monoisotopic Mass, Even Electron Ions

3312 formula(e) evaluated with 16 results within limits (up to 20 closest results for each mass)

Elements Used:

C: 11-44 H: 0-99 N: 0-11 O: 0-11 F: 0-3 S: 0-1

WH-14 Tau

PK Hendris WH-14 Tau 29 (0.708) Cm (29:30)

1: TOF MS ES+  
3.80e+002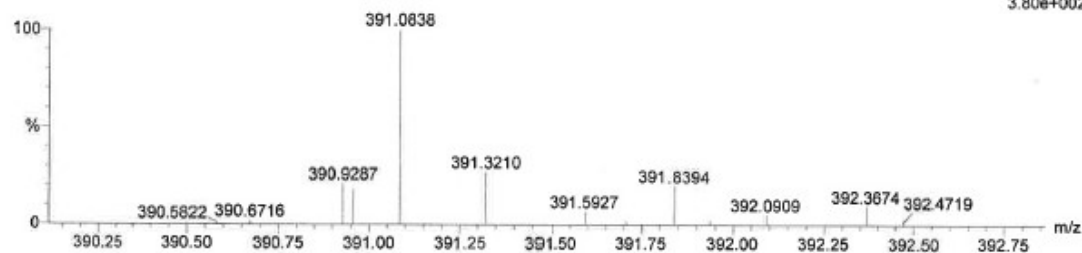

Minimum:

Maximum: 55.0 4.0 -1.5

| Mass     | Calc. Mass | mDa  | PPM  | DBE  | i-FIT | i-FIT (Norm) | Formula               |
|----------|------------|------|------|------|-------|--------------|-----------------------|
| 391.0838 | 391.0838   | 0.0  | 0.0  | 16.5 | 62.8  | 3.5          | C16 H11 N10 O         |
|          | 391.0836   | 0.2  | 0.5  | 7.5  | 62.8  | 3.4          | S<br>C12 H16 N6 O6    |
|          | 391.0840   | -0.2 | -0.5 | 12.5 | 62.8  | 3.4          | F S<br>C18 H14 N4 O   |
|          | 391.0841   | -0.3 | -0.8 | 7.5  | 61.4  | 2.0          | F3 S<br>C16 H17 O9 F2 |
|          | 391.0843   | -0.5 | -1.3 | 16.5 | 61.9  | 2.6          | C20 H12 N4 O4         |
|          | 391.0831   | 0.7  | 1.8  | 20.5 | 62.4  | 3.1          | F<br>C23 H11 N4 O3    |
|          | 391.0829   | 0.9  | 2.3  | 11.5 | 62.0  | 2.7          | C19 H16 O8 F          |
|          | 391.0829   | 0.9  | 2.3  | 16.5 | 63.2  | 3.9          | C21 H13 N4 F2         |
|          | 391.0827   | 1.1  | 2.8  | 7.5  | 63.1  | 3.8          | S<br>C17 H18 O5 F3    |
|          | 391.0849   | -1.1 | -2.8 | 12.5 | 62.9  | 3.5          | S<br>C13 H12 N10 O2   |
|          | 391.0827   | 1.1  | 2.8  | 13.5 | 61.3  | 2.0          | F S<br>C13 H9 N10 O3  |
|          | 391.0850   | -1.2 | -3.1 | 7.5  | 61.1  | 1.8          | F2<br>C11 H15 N6 O10  |
|          | 391.0825   | 1.3  | 3.3  | 11.5 | 63.3  | 4.0          | C15 H15 N6 O5         |
|          | 391.0852   | -1.4 | -3.6 | 3.5  | 61.2  | 1.9          | S<br>C13 H18 O10 F3   |
|          | 391.0852   | -1.4 | -3.6 | 10.5 | 63.3  | 3.9          | C19 H19 O7 S          |
|          | 391.0823   | 1.5  | 3.8  | 2.5  | 63.4  | 4.1          | C11 H20 N2 O10        |
|          |            |      |      |      |       |              | F S                   |

# Compound 68

## Elemental Composition Report

Page 1

### Single Mass Analysis

Tolerance = 5.0 PPM / DBE: min = -1.5, max = 120.0

Element prediction: Off

Number of isotope peaks used for i-FIT = 3

Monoisotopic Mass, Even Electron Ions

3590 formula(e) evaluated with 20 results within limits (up to 20 closest results for each mass)

Elements Used:

C: 11-44 H: 0-99 N: 0-11 O: 0-11 F: 0-3 S: 0-1

WH-19 Tau

PK Hendris WH-19 Tau 169 (4.020) Cm (169:170)

1: TOF MS ES+  
4.16e+003

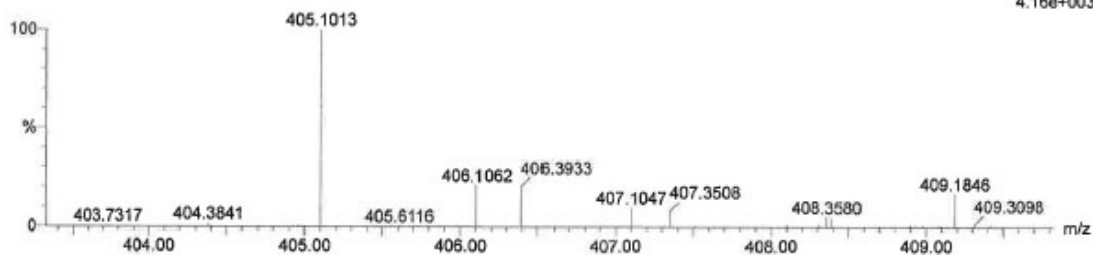

| Mass     | Calc. Mass | mDa  | PPM  | DBE  | i-FIT | i-FIT (Norm) | Formula                |
|----------|------------|------|------|------|-------|--------------|------------------------|
| 405.1013 | 405.1012   | 0.1  | 0.2  | 21.5 | 91.9  | 7.0          | C22 H10 N8 F           |
|          | 405.1011   | 0.2  | 0.5  | 12.5 | 91.0  | 6.2          | C18 H15 N4 O5<br>F2    |
|          | 405.1017   | -0.4 | -1.0 | 8.5  | 90.9  | 6.1          | C11 H15 N10 O3<br>F2 S |
|          | 405.1009   | 0.4  | 1.0  | 3.5  | 90.7  | 5.9          | C14 H20 O10 F3         |
|          | 405.1008   | 0.5  | 1.2  | 10.5 | 86.8  | 2.0          | C20 H21 O7 S           |
|          | 405.1019   | -0.6 | -1.5 | 6.5  | 85.1  | 0.3          | C17 H22 O8 F S         |
|          | 405.1006   | 0.7  | 1.7  | 12.5 | 89.6  | 4.8          | C14 H14 N10 O2<br>F S  |
|          | 405.1020   | -0.7 | -1.7 | 12.5 | 91.6  | 6.8          | C13 H13 N10 O6         |
|          | 405.1006   | 0.7  | 1.7  | 7.5  | 91.6  | 6.8          | C12 H17 N6 O10         |
|          | 405.1021   | -0.8 | -2.0 | 15.5 | 88.7  | 3.9          | C21 H17 N4 O3<br>S     |
|          | 405.1022   | -0.9 | -2.2 | 8.5  | 91.3  | 6.5          | C15 H16 N4 O6<br>F3    |
|          | 405.1024   | -1.1 | -2.7 | 17.5 | 91.8  | 7.0          | C19 H11 N8 O<br>F2     |
|          | 405.0999   | 1.4  | 3.5  | 16.5 | 91.9  | 7.1          | C21 H14 N4 O4<br>F     |
|          | 405.1028   | -1.5 | -3.7 | 24.5 | 93.2  | 8.4          | C29 H13 N2 O           |
|          | 405.0997   | 1.6  | 3.9  | 12.5 | 89.9  | 5.1          | C19 H16 N4 O<br>F3 S   |
|          | 405.0997   | 1.6  | 3.9  | 7.5  | 91.3  | 6.5          | C17 H19 O9 F2          |
|          | 405.0995   | 1.8  | 4.4  | 9.5  | 93.7  | 8.9          | C11 H12 N10 O4<br>F3   |
|          | 405.0995   | 1.8  | 4.4  | 16.5 | 90.5  | 5.7          | C17 H13 N10 O<br>S     |
|          | 405.1031   | -1.8 | -4.4 | 2.5  | 88.5  | 3.7          | C14 H23 O9 F2<br>S     |
|          | 405.1033   | -2.0 | -4.9 | 11.5 | 87.7  | 2.9          | C18 H18 N4 O4<br>F S   |

Elemental Composition Report

Single Mass Analysis

Tolerance = 19.0 PPM / DBE: min = -1.5, max = 120.0

Element prediction: Off

Number of isotope peaks used for i-FIT = 3

Monoisotopic Mass, Even Electron Ions

644 formula(e) evaluated with 9 results within limits (up to 20 closest results for each mass)

Elements Used:

C: 11-44 H: 0-99 N: 0-11 O: 0-11 S: 0-1

WH-13 Tau

PK Hendris WH-13 Tau 33 (0.796) Cm (33)

1: TOF MS ES+  
7.08e+002

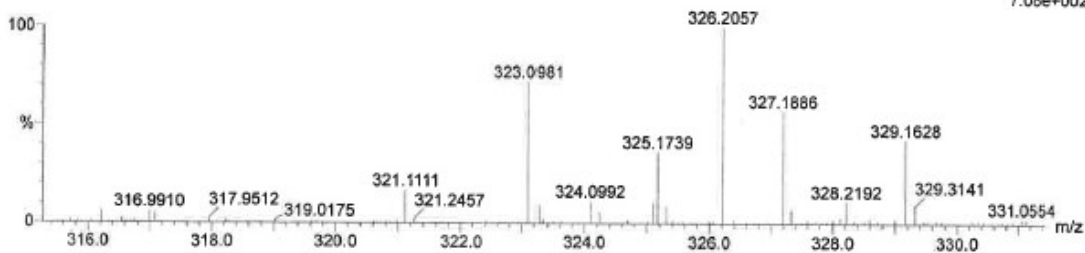

| Mass     | Calc. Mass | mDa  | PPM   | DBE  | i-FIT | i-FIT (Norm) | Formula                 |
|----------|------------|------|-------|------|-------|--------------|-------------------------|
| 323.0981 | 323.0978   | 0.3  | 0.9   | 3.5  | 87.5  | 2.1          | C12 H19 O10             |
|          | 323.0992   | -1.1 | -3.4  | 8.5  | 87.7  | 2.3          | C13 H15 N4 O6           |
|          | 323.0967   | 1.4  | 4.3   | 12.5 | 86.7  | 1.3          | C17 H15 N4 O S          |
|          | 323.1005   | -2.4 | -7.4  | 13.5 | 88.2  | 2.8          | C14 H11 N8 O2           |
|          | 323.0953   | 2.8  | 8.7   | 7.5  | 86.6  | 1.2          | C16 H19 O5 S            |
|          | 323.0933   | 4.8  | 14.9  | 17.5 | 89.7  | 4.3          | C20 H11 N4 O            |
|          | 323.1032   | -5.1 | -15.8 | 12.5 | 90.2  | 4.8          | C18 H15 N2 O4           |
|          | 323.0926   | 5.5  | 17.0  | 8.5  | 88.3  | 2.9          | C12 H15 N6 O3           |
|          | 323.1039   | -5.8 | -18.0 | 8.5  | 88.4  | 2.9          | S<br>C11 H15 N8 O2<br>S |

# Compound 70

## Elemental Composition Report

Page 1

### Single Mass Analysis

Tolerance = 6.0 PPM / DBE: min = -1.5, max = 120.0

Element prediction: Off

Number of isotope peaks used for i-FIT = 3

Monoisotopic Mass, Even Electron Ions

2558 formula(e) evaluated with 15 results within limits (up to 20 closest results for each mass)

Elements Used:

C: 11-44 H: 0-99 N: 0-11 O: 0-11 F: 0-3 S: 0-1

WH-09 Tau

PK Hendris WH-09 Tau 49 (1.187) Cm (44.51)

1: TOF MS ES+  
1.56e+004

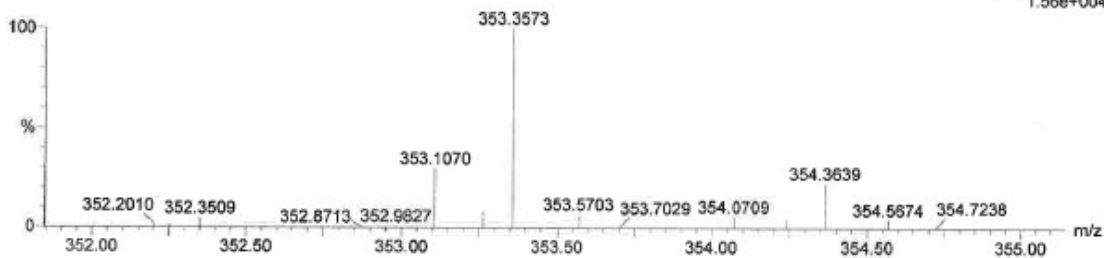

Minimum:

Maximum: 55.0 6.0 -1.5

Maximum: 120.0

| Mass     | Calc. Mass | mDa  | PPM  | DBE  | i-FIT | i-FIT (Norm) | Formula           |
|----------|------------|------|------|------|-------|--------------|-------------------|
| 353.1070 | 353.1070   | 0.0  | 0.0  | 3.5  | 179.5 | 3.9          | C14 H22 O7 F S    |
|          | 353.1072   | -0.2 | -0.6 | 12.5 | 179.5 | 3.9          | C18 H17 N4 O2 S   |
|          | 353.1073   | -0.3 | -0.8 | 5.5  | 177.7 | 2.1          | C12 H16 N4 O5 F3  |
|          | 353.1075   | -0.5 | -1.4 | 14.5 | 177.6 | 2.0          | C16 H11 N8 F2     |
|          | 353.1061   | 0.9  | 2.5  | 9.5  | 177.9 | 2.3          | C15 H15 N4 O4 F2  |
|          | 353.1079   | -0.9 | -2.5 | 21.5 | 178.8 | 3.2          | C26 H13 N2        |
|          | 353.1059   | 1.1  | 3.1  | 0.5  | 178.2 | 2.6          | C11 H20 O9 F3     |
|          | 353.1059   | 1.1  | 3.1  | 7.5  | 179.5 | 3.9          | C17 H21 O6 S      |
|          | 353.1082   | -1.2 | -3.4 | -0.5 | 179.5 | 3.9          | C11 H23 O8 F2 S   |
|          | 353.1057   | 1.3  | 3.7  | 9.5  | 179.2 | 3.6          | C11 H14 N10 O F S |
|          | 353.1084   | -1.4 | -4.0 | 8.5  | 179.4 | 3.8          | C15 H18 N4 O3 F S |
|          | 353.1084   | -1.4 | -4.0 | 3.5  | 178.6 | 3.0          | C13 H21 O11       |
|          | 353.1086   | -1.6 | -4.5 | 10.5 | 177.1 | 1.5          | C13 H12 N8 O F3   |
|          | 353.1050   | 2.0  | 5.7  | 13.5 | 178.2 | 2.6          | C18 H14 N4 O3 F   |
|          | 353.1090   | -2.0 | -5.7 | 17.5 | 178.6 | 3.0          | C23 H14 N2 O F    |

# Compound 71

## Elemental Composition Report

Page 1

### Single Mass Analysis

Tolerance = 5.0 PPM / DBE: min = -1.5, max = 120.0

Element prediction: Off

Number of isotope peaks used for i-FIT = 3

Monoisotopic Mass, Even Electron Ions

1080 formula(e) evaluated with 7 results within limits (all results (up to 1000) for each mass)

Elements Used:

C: 9-35 H: 0-20 N: 0-10 O: 0-17 Na: 0-1 S: 0-1

Taus-FL-HO2-OMe

PK HendrisW Taus-FL-HO2-OMe 58 (1.399) Cm (55:58)

1: TOF MS ES+  
3.55e+003

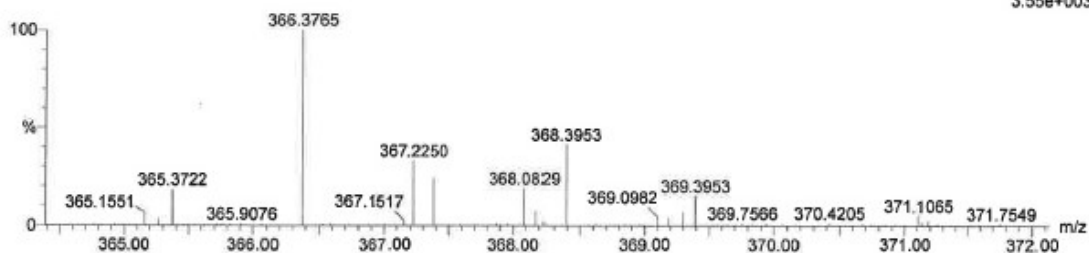

Minimum:

Maximum: 55.0 5.0 -1.5

120.0

| Mass     | Calc. Mass | mDa  | PPM  | DBE  | i-FIT | i-FIT (Norm) | Formula       |
|----------|------------|------|------|------|-------|--------------|---------------|
| 368.0829 | 368.0829   | 0.0  | 0.0  | 4.5  | 203.4 | 2.7          | C12 H18 N O12 |
|          | 368.0832   | -0.3 | -0.8 | 11.5 | 203.0 | 2.3          | C12 H11 N9 O4 |
|          | 368.0824   | 0.5  | 1.4  | 22.5 | 201.9 | 1.2          | Na            |
|          | 368.0834   | -0.5 | -1.4 | 14.5 | 202.5 | 1.8          | C25 H10 N3 O  |
|          | 368.0818   | 1.1  | 3.0  | 6.5  | 203.8 | 3.1          | C20 H15 N3 O  |
|          | 368.0817   | 1.2  | 3.3  | 13.5 | 202.7 | 2.0          | Na S          |
|          | 368.0842   | -1.3 | -3.5 | 9.5  | 202.4 | 1.7          | C11 H15 N5 O8 |
|          |            |      |      |      |       |              | Na            |
|          |            |      |      |      |       |              | C17 H14 N5 O3 |
|          |            |      |      |      |       |              | S             |
|          |            |      |      |      |       |              | C13 H14 N5 O8 |

# Compound 72

## Elemental Composition Report

Page 1

### Single Mass Analysis

Tolerance = 6.0 PPM / DBE: min = -1.5, max = 120.0

Element prediction: Off

Number of isotope peaks used for i-FIT = 3

Monoisotopic Mass, Even Electron Ions

3137 formula(e) evaluated with 15 results within limits (up to 20 closest results for each mass)

Elements Used:

C: 11-44 H: 0-99 N: 0-11 O: 0-11 F: 0-3 S: 0-1

WH-10 Tau

PK Hendris WH-10 Tau 40 (0.974) Cm (40.41)

1: TOF MS ES+  
1.07e+003

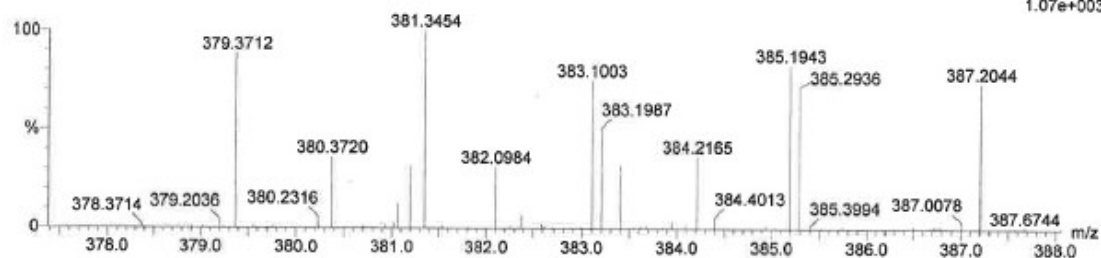

Minimum:

Maximum: 55.0 6.0 -1.5

Maximum: 120.0

| Mass     | Calc. Mass | mDa  | PPM  | DBE  | i-FIT | i-FIT (Norm) | Formula        |
|----------|------------|------|------|------|-------|--------------|----------------|
| 382.0984 | 382.0985   | -0.1 | -0.3 | 9.5  | 139.7 | 2.1          | C15 H17 N5 O4  |
|          |            |      |      |      |       |              | F S            |
|          | 382.0983   | 0.1  | 0.3  | 0.5  | 140.1 | 2.4          | C11 H22 N O9   |
|          |            |      |      |      |       |              | F2 S           |
|          | 382.0988   | -0.4 | -1.0 | 11.5 | 140.3 | 2.7          | C13 H11 N9 O2  |
|          |            |      |      |      |       |              | F3             |
|          | 382.0980   | 0.4  | 1.0  | 22.5 | 140.3 | 2.6          | C26 H12 N3 O   |
|          | 382.0992   | -0.8 | -2.1 | 18.5 | 141.3 | 3.6          | C23 H13 N3 O2  |
|          |            |      |      |      |       |              | F              |
|          | 382.0976   | 0.8  | 2.1  | 15.5 | 140.1 | 2.4          | C16 H10 N9 O   |
|          |            |      |      |      |       |              | F2             |
|          | 382.0974   | 1.0  | 2.6  | 6.5  | 140.3 | 2.6          | C12 H15 N5 O6  |
|          |            |      |      |      |       |              | F3             |
|          | 382.0974   | 1.0  | 2.6  | 13.5 | 139.6 | 1.9          | C18 H16 N5 O3  |
|          |            |      |      |      |       |              | S              |
|          | 382.0972   | 1.2  | 3.1  | 4.5  | 139.8 | 2.2          | C14 H21 N O8 F |
|          |            |      |      |      |       |              | S              |
|          | 382.0997   | -1.3 | -3.4 | 5.5  | 140.8 | 3.1          | C12 H18 N5 O5  |
|          |            |      |      |      |       |              | F2 S           |
|          | 382.0999   | -1.5 | -3.9 | 9.5  | 141.9 | 4.2          | C14 H16 N5 O8  |
|          | 382.0999   | -1.5 | -3.9 | 14.5 | 140.7 | 3.0          | C16 H13 N9 F S |
|          | 382.0965   | 1.9  | 5.0  | 19.5 | 140.7 | 3.1          | C19 H9 N9 F    |
|          | 382.1003   | -1.9 | -5.0 | 14.5 | 142.6 | 5.0          | C20 H14 N3 O3  |
|          |            |      |      |      |       |              | F2             |
|          | 382.0963   | 2.1  | 5.5  | 10.5 | 140.9 | 3.3          | C15 H14 N5 O5  |
|          |            |      |      |      |       |              | F2             |

# Compound 73

## Elemental Composition Report

Page 1

### Single Mass Analysis

Tolerance = 6.0 PPM / DBE: min = -1.5, max = 120.0

Element prediction: Off

Number of isotope peaks used for i-FIT = 3

Monoisotopic Mass, Even Electron Ions

2466 formula(e) evaluated with 13 results within limits (up to 20 closest results for each mass)

Elements Used:

C: 11-44 H: 0-99 N: 0-11 O: 0-11 F: 0-3 S: 0-1

WH-11 Tau

PK Hendris WH-11 Tau 34 (0.833) Cm (31:36)

1: TOF MS ES+  
5.85e+003

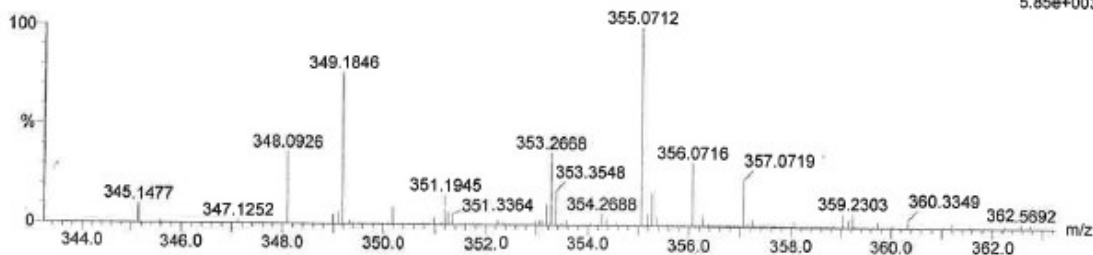

Minimum:  
Maximum:

55.0 6.0 -1.5  
120.0

| Mass     | Calc. Mass | mDa  | PPM  | DBE  | i-FIT | i-FIT (Norm) | Formula                          |
|----------|------------|------|------|------|-------|--------------|----------------------------------|
| 348.0926 | 348.0929   | -0.3 | -0.9 | 1.5  | 171.1 | 10.3         | C11 H20 N O7                     |
|          | 348.0930   | -0.4 | -1.1 | 10.5 | 170.6 | 9.8          | F2 S<br>C15 H15 N5 O2            |
|          | 348.0931   | -0.5 | -1.4 | 5.5  | 167.3 | 6.5          | F S<br>C13 H18 N O10             |
|          | 348.0920   | 0.6  | 1.7  | 7.5  | 162.7 | 1.9          | C12 H13 N5 O4                    |
|          | 348.0933   | -0.7 | -2.0 | 12.5 | 161.0 | 0.2          | F3                               |
|          | 348.0919   | 0.7  | 2.0  | 14.5 | 170.5 | 9.8          | C13 H9 N9 F3                     |
|          | 348.0917   | 0.9  | 2.6  | 5.5  | 171.0 | 10.2         | C18 H14 N5 O S<br>C14 H19 N O6 F |
|          | 348.0937   | -1.1 | -3.2 | 19.5 | 169.6 | 8.8          | S<br>C23 H11 N3 F                |
|          | 348.0942   | -1.6 | -4.6 | 6.5  | 171.2 | 10.4         | C12 H16 N5 O3                    |
|          | 348.0944   | -1.8 | -5.2 | 10.5 | 166.4 | 5.7          | F2 S<br>C14 H14 N5 O6            |
|          | 348.0908   | 1.8  | 5.2  | 11.5 | 164.1 | 3.4          | C15 H12 N5 O3                    |
|          | 348.0906   | 2.0  | 5.7  | 2.5  | 166.6 | 5.8          | F2<br>C11 H17 N O8               |
|          | 348.0906   | 2.0  | 5.7  | 9.5  | 171.6 | 10.8         | F3<br>C17 H18 N O5 S             |

# Compound 74

## Elemental Composition Report

Page 1

### Single Mass Analysis

Tolerance = 15.0 PPM / DBE: min = -1.5, max = 120.0

Element prediction: Off

Number of isotope peaks used for i-FIT = 3

Monoisotopic Mass, Even Electron Ions

782 formula(e) evaluated with 12 results within limits (up to 20 closest results for each mass)

Elements Used:

C: 11-44 H: 0-99 N: 0-11 F: 0-3 Na: 0-1 S: 0-2

WH-17 Tau

PK Hendris WH-17 Tau 122 (2.904) Cm (122:123)

1: TOF MS ES+  
1.55e+003

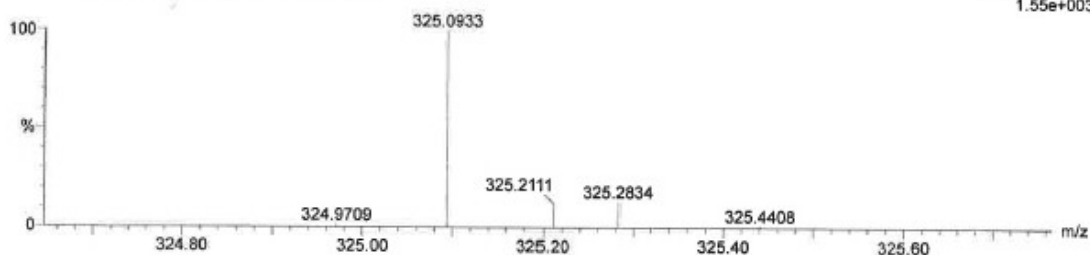

| Mass     | Calc. Mass | mDa  | PPM  | DBE  | i-FIT | i-FIT (Norm) | Formula                |
|----------|------------|------|------|------|-------|--------------|------------------------|
| 325.0933 | 325.0933   | 0.0  | 0.0  | 4.5  | 50.8  | 1.9          | C12 H19 N4 F           |
|          | 325.0929   | 0.4  | 1.2  | 10.5 | 50.9  | 2.0          | Na S2<br>C17 H13 N2 F3 |
|          | 325.0926   | 0.7  | 2.2  | 14.5 | 50.9  | 2.0          | Na<br>C15 H10 N8 Na    |
|          | 325.0923   | 1.0  | 3.1  | 12.5 | 51.1  | 2.1          | C17 H14 N4 F S         |
|          | 325.0950   | -1.7 | -5.2 | 17.5 | 51.4  | 2.4          | C17 H9 N8              |
|          | 325.0953   | -2.0 | -6.2 | 13.5 | 51.5  | 2.5          | C19 H12 N2 F3          |
|          | 325.0957   | -2.4 | -7.4 | 7.5  | 51.6  | 2.7          | C14 H18 N4 F           |
|          | 325.0960   | -2.7 | -8.3 | 9.5  | 51.6  | 2.7          | S2<br>C12 H14 N8 Na    |
|          | 325.0962   | -2.9 | -8.9 | 5.5  | 51.8  | 2.8          | S<br>C14 H17 N2 F3     |
|          | 325.0899   | 3.4  | 10.5 | 9.5  | 52.1  | 3.2          | Na S<br>C15 H15 N4 F   |
|          | 325.0896   | 3.7  | 11.4 | 7.5  | 52.4  | 3.4          | Na S<br>C17 H19 F2 S2  |
|          | 325.0889   | 4.4  | 13.5 | 17.5 | 52.7  | 3.8          | C20 H10 N4 F           |



# Compound 75

## Elemental Composition Report

Page 1

### Single Mass Analysis

Tolerance = 11.0 PPM / DBE: min = -1.5, max = 120.0

Element prediction: Off

Number of isotope peaks used for i-FIT = 3

Monoisotopic Mass, Even Electron Ions

1022 formula(e) evaluated with 6 results within limits (up to 20 closest results for each mass)

Elements Used:

C: 15-44 H: 0-66 N: 0-11 O: 0-11 F: 0-1 S: 0-1

Tau R=Me n=2 R=F

PK Hendirs Tau R-Me n-2 R-F 24 (0.584) Cm (23:24)

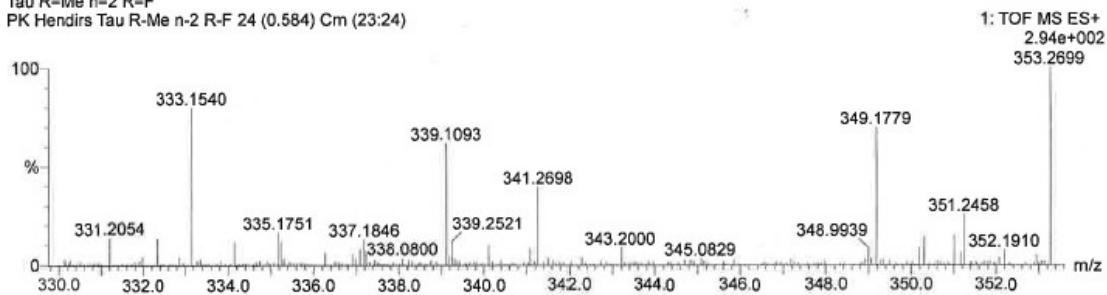

Minimum:

Maximum: 55.0 11.0 -1.5

Maximum: 120.0

| Mass     | Calc. Mass | mDa  | PPM  | DBE  | i-FIT | i-FIT (Norm) | Formula        |
|----------|------------|------|------|------|-------|--------------|----------------|
| 339.1093 | 339.1093   | 0.0  | 0.0  | 12.5 | 113.6 | 3.3          | C17 H15 N4 O4  |
|          | 339.1080   | 1.3  | 3.8  | 7.5  | 113.2 | 2.9          | C16 H19 O8     |
|          | 339.1080   | 1.3  | 3.8  | 12.5 | 111.5 | 1.2          | C18 H16 N4 F S |
|          | 339.1107   | -1.4 | -4.1 | 17.5 | 114.0 | 3.7          | C18 H11 N8     |
|          | 339.1118   | -2.5 | -7.4 | 13.5 | 113.5 | 3.2          | C15 H12 N8 O F |
|          | 339.1066   | 2.7  | 8.0  | 7.5  | 110.9 | 0.6          | C17 H20 O4 F S |

Elemental Composition Report

Single Mass Analysis

Tolerance = 5.0 PPM / DBE: min = -1.5, max = 120.0

Element prediction: Off

Number of isotope peaks used for i-FIT = 3

Monoisotopic Mass, Even Electron Ions

4015 formula(e) evaluated with 21 results within limits (up to 15 closest results for each mass)

Elements Used:

C: 11-44 H: 0-99 N: 0-11 O: 0-11 F: 0-3 S: 0-2

WH-16 Tau

PK Hendris WH-16 Tau 32 (0.779) Cm (32:33)

1: TOF MS ES+  
1.97e+003

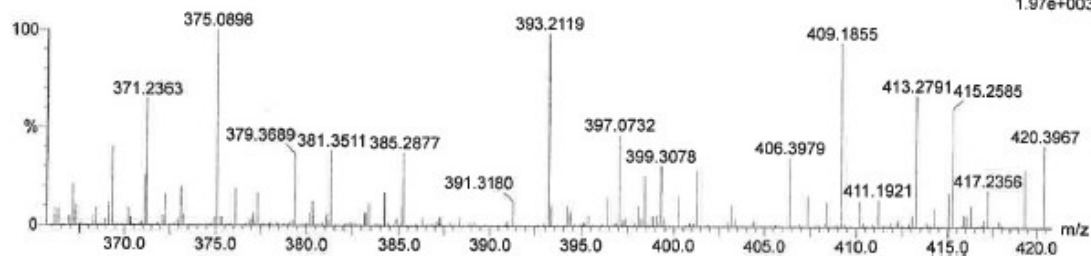

| Mass     | Calc. Mass | mDa  | PPM  | DBE  | i-FIT | i-FIT (Norm) | Formula              |
|----------|------------|------|------|------|-------|--------------|----------------------|
| 375.0898 | 375.0896   | 0.2  | 0.5  | 1.5  | 106.3 | 6.9          | C11 H23 N2 O8        |
|          | 375.0900   | -0.2 | -0.5 | 12.5 | 99.7  | 0.4          | S2<br>C13 H12 N10 O  |
|          | 375.0900   | -0.2 | -0.5 | 6.5  | 105.3 | 6.0          | F S<br>C17 H21 O3 F2 |
|          | 375.0901   | -0.3 | -0.8 | 7.5  | 105.2 | 5.9          | S2<br>C11 H15 N6 O9  |
|          | 375.0902   | -0.4 | -1.1 | 10.5 | 102.0 | 2.6          | C19 H19 O6 S         |
|          | 375.0903   | -0.5 | -1.3 | 3.5  | 105.4 | 6.1          | C13 H18 O9 F3        |
|          | 375.0893   | 0.5  | 1.3  | 16.5 | 106.0 | 6.7          | C20 H12 N4 O3        |
|          | 375.0905   | -0.7 | -1.9 | 12.5 | 105.7 | 6.4          | F<br>C17 H13 N4 O4   |
|          | 375.0891   | 0.7  | 1.9  | 12.5 | 102.6 | 3.2          | F2<br>C18 H14 N4 F3  |
|          | 375.0891   | 0.7  | 1.9  | 7.5  | 104.7 | 5.4          | S<br>C16 H17 O8 F2   |
|          | 375.0889   | 0.9  | 2.4  | 16.5 | 103.4 | 4.1          | C16 H11 N10 S        |
|          | 375.0889   | 0.9  | 2.4  | 10.5 | 106.7 | 7.4          | C20 H20 O2 F         |
|          | 375.0909   | -1.1 | -2.9 | 6.5  | 105.8 | 6.5          | S2<br>C12 H19 N6 O4  |
|          | 375.0887   | 1.1  | 2.9  | 7.5  | 101.2 | 1.8          | S2<br>C12 H16 N6 O5  |
|          | 375.0912   | -1.4 | -3.7 | 2.5  | 105.8 | 6.5          | F S<br>C14 H22 O4 F3 |
|          |            |      |      |      |       |              | S2                   |

Compound 89

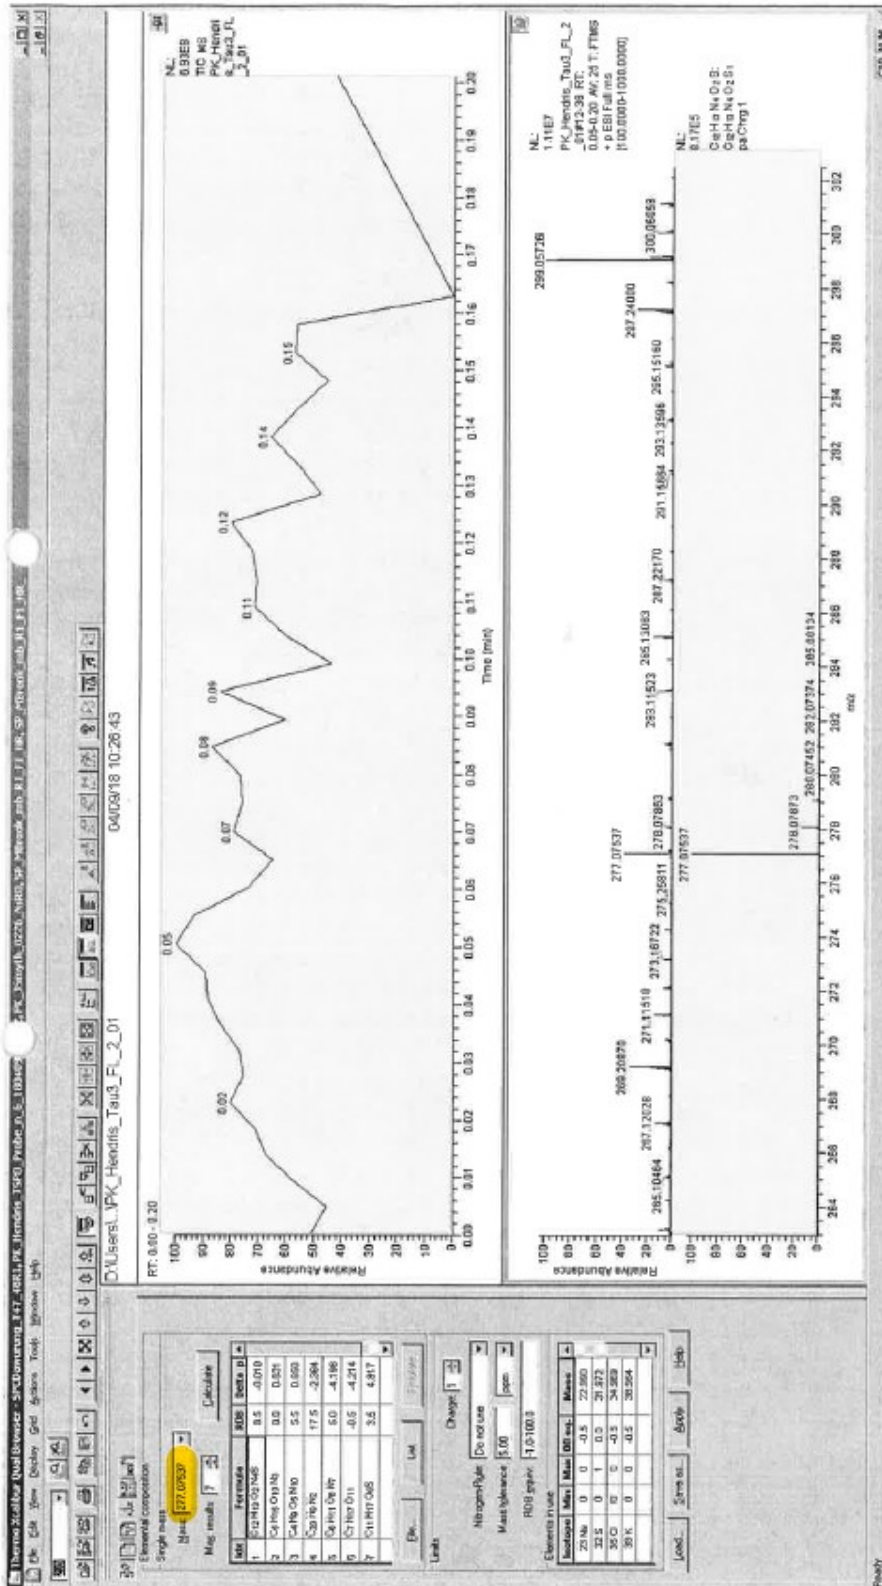

Compound 90

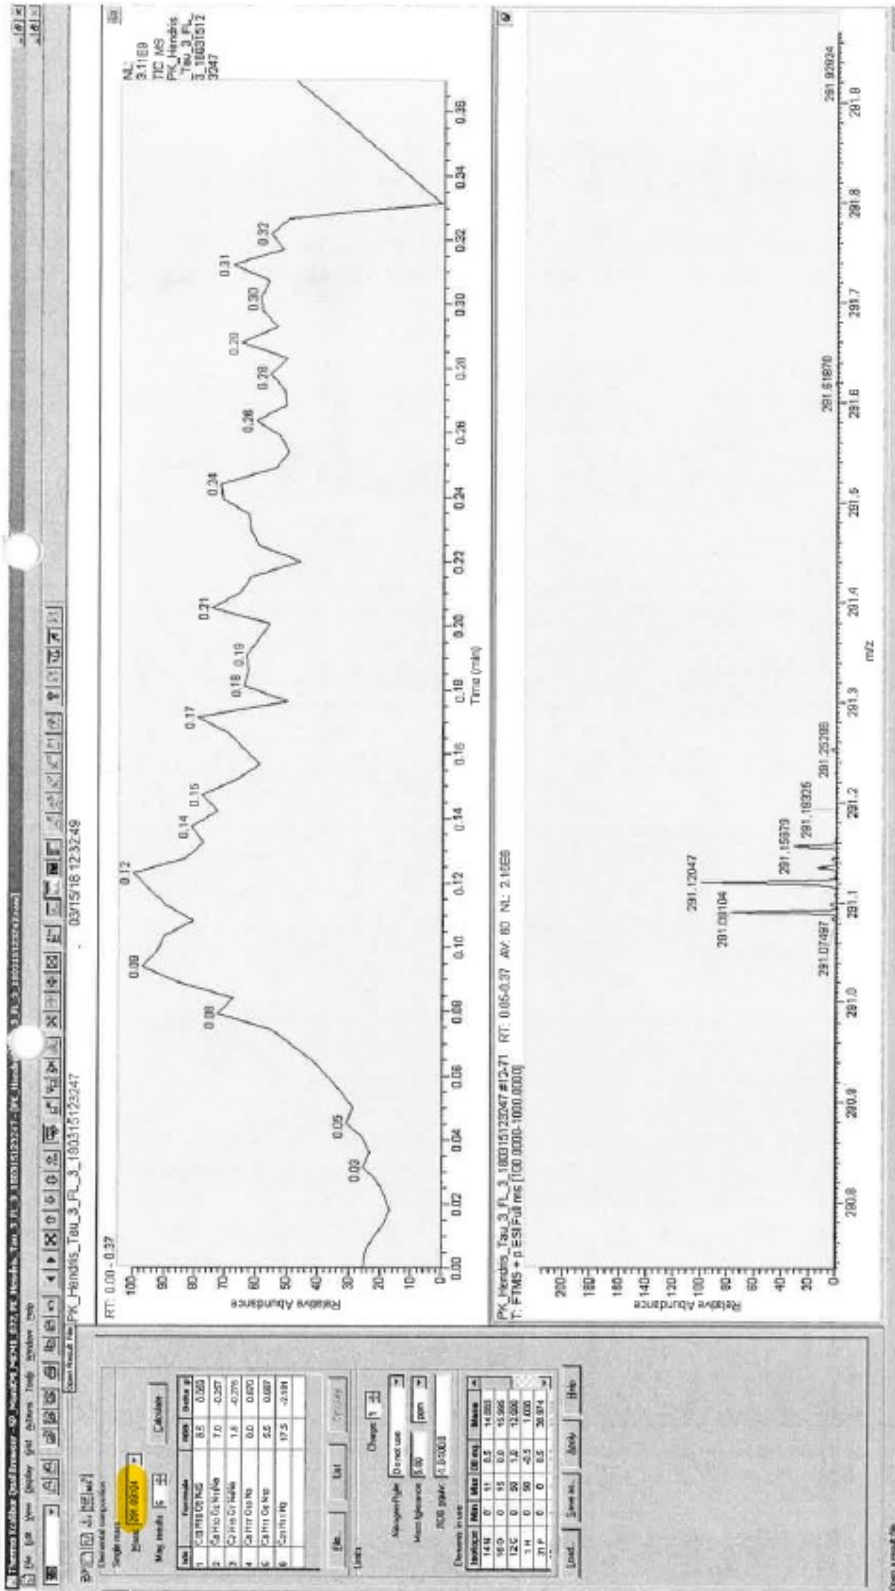

# Compound 91

## Elemental Composition Report

Page 1

### Single Mass Analysis

Tolerance = 6.0 PPM / DBE: min = -1.5, max = 120.0

Element prediction: Off

Number of isotope peaks used for i-FIT = 3

Monoisotopic Mass, Even Electron Ions

1641 formula(e) evaluated with 8 results within limits (all results (up to 1000) for each mass)

Elements Used:

C: 9-35 H: 0-66 N: 0-10 O: 0-17 Na: 0-1 S: 0-1

Taus3-FL-7-ol

PK HendrisW Taus3-FL-7-ol 124 (2.958) Cm (123:125)

1: TOF MS ES+  
2.84e+003

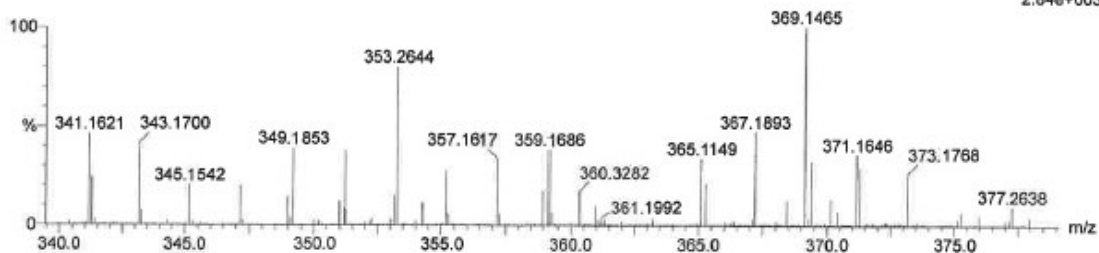

Minimum:

Maximum: 55.0 6.0 -1.5

Maximum: 120.0

| Mass     | Calc. Mass | mDa  | PPM  | DBE  | i-FIT | i-FIT (Norm) | Formula              |
|----------|------------|------|------|------|-------|--------------|----------------------|
| 347.1556 | 347.1556   | 0.0  | 0.0  | 6.5  | 117.2 | 2.0          | C12 H20 N8 O3        |
|          | 347.1558   | -0.2 | -0.6 | 9.5  | 117.9 | 2.7          | Na<br>C20 H24 N2 Na  |
|          | 347.1553   | 0.3  | 0.9  | -0.5 | 117.0 | 1.8          | S<br>C12 H27 O11     |
|          | 347.1548   | 0.8  | 2.3  | 17.5 | 117.4 | 2.2          | C25 H19 N2           |
|          | 347.1567   | -1.1 | -3.2 | 4.5  | 117.0 | 1.8          | C13 H23 N4 O7        |
|          | 347.1543   | 1.3  | 3.7  | 1.5  | 117.1 | 1.9          | Na<br>C11 H24 N4 O7  |
|          | 347.1542   | 1.4  | 4.0  | 8.5  | 118.0 | 2.8          | S<br>C17 H23 N4 O2 ✓ |
|          | 347.1540   | 1.6  | 4.6  | 5.5  | 117.2 | 2.0          | C9 H19 N10 O5        |

Compound 92

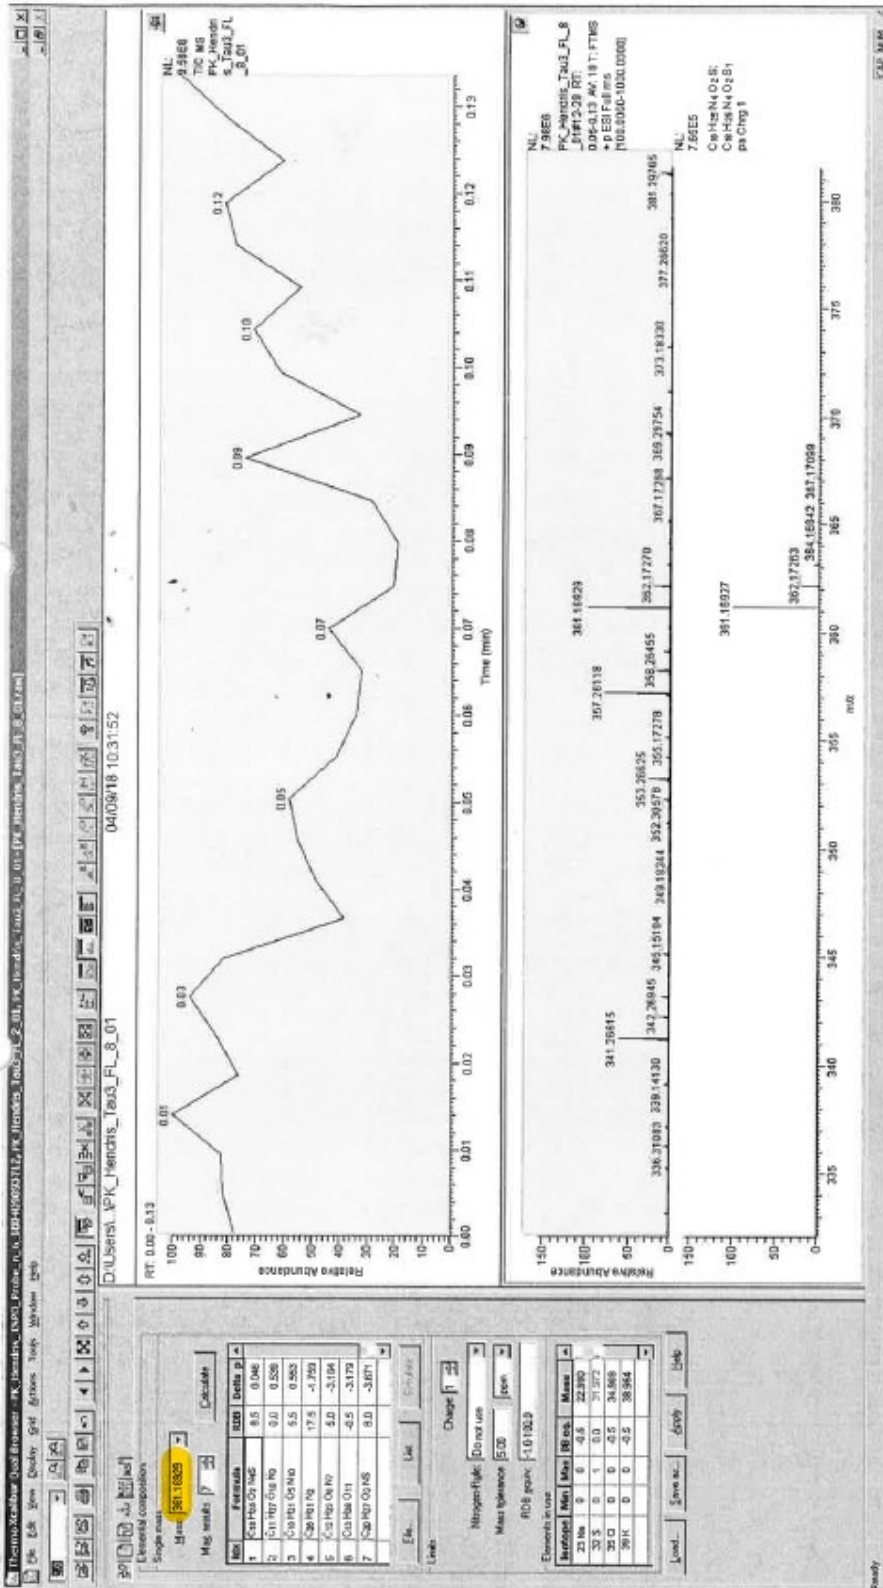

Elemental composition

| Min | Formula                                                       | DB   | Delta p |
|-----|---------------------------------------------------------------|------|---------|
| 1   | C <sub>10</sub> H <sub>12</sub> O <sub>2</sub> N <sub>2</sub> | 8.5  | 0.046   |
| 2   | C <sub>11</sub> H <sub>14</sub> O <sub>2</sub> N <sub>2</sub> | 0.0  | 0.259   |
| 3   | C <sub>10</sub> H <sub>12</sub> O <sub>2</sub> N <sub>2</sub> | 5.5  | 0.953   |
| 4   | C <sub>10</sub> H <sub>12</sub> O <sub>2</sub> N <sub>2</sub> | 17.5 | -1.793  |
| 5   | C <sub>10</sub> H <sub>12</sub> O <sub>2</sub> N <sub>2</sub> | 5.0  | -3.194  |
| 6   | C <sub>10</sub> H <sub>12</sub> O <sub>2</sub> N <sub>2</sub> | -4.5 | -3.179  |
| 7   | C <sub>10</sub> H <sub>12</sub> O <sub>2</sub> N <sub>2</sub> | 8.0  | -3.871  |

Mass balance: 5.00

Elemental in use: C<sub>10</sub>H<sub>12</sub>O<sub>2</sub>N<sub>2</sub>

| Reference | Min | Max | DB   | Mass    |
|-----------|-----|-----|------|---------|
| 2         | 0   | 0   | 0.0  | 221.070 |
| 3         | 0   | 1   | 0.0  | 241.072 |
| 3         | 0   | 0   | -0.5 | 244.068 |
| 3         | 0   | 0   | -0.5 | 284.064 |

# Compound 93

## Elemental Composition Report

Page 1

### Single Mass Analysis

Tolerance = 10.0 PPM / DBE: min = -1.5, max = 120.0

Element prediction: Off

Number of isotope peaks used for i-FIT = 3

Monoisotopic Mass, Even Electron Ions

1268 formula(e) evaluated with 11 results within limits (up to 25 closest results for each mass)

Elements Used:

C: 9-39 H: 0-75 N: 0-10 O: 0-12 Na: 0-1 S: 0-1

Tau3-FL-Ethydiol

PK Hendris Tau3-FL-Ethydiol 237 (5.613) Cm (237:241)

1: TOF MS ES+  
8.95e+002

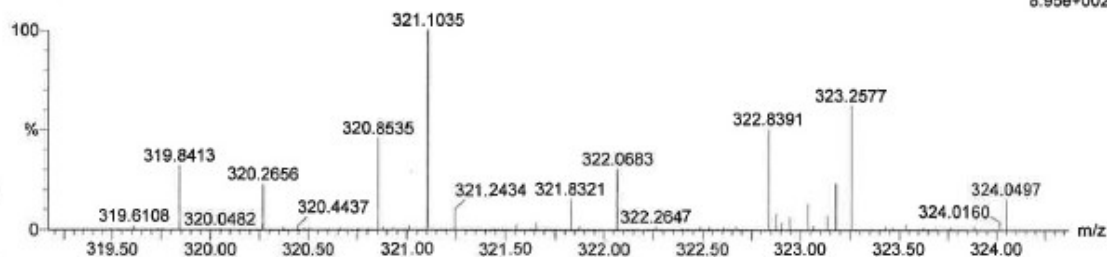

Minimum:

Maximum: 55.0 10.0 -1.5

Maximum: 55.0 10.0 120.0

| Mass     | Calc. Mass | mDa  | PPM  | DBE  | i-FIT | i-FIT (Norm) | Formula                  |
|----------|------------|------|------|------|-------|--------------|--------------------------|
| 321.1035 | 321.1036   | -0.1 | -0.3 | 6.5  | 203.2 | 4.9          | C9 H14 N8 O4<br>Na       |
|          | 321.1033   | 0.2  | 0.6  | -0.5 | 203.5 | 5.2          | C9 H21 O12               |
|          | 321.1038   | -0.3 | -0.9 | 9.5  | 200.2 | 1.9          | C17 H18 N2 O<br>Na S     |
|          | 321.1028   | 0.7  | 2.2  | 17.5 | 199.8 | 1.5          | C22 H13 N2 O             |
|          | 321.1046   | -1.1 | -3.4 | 4.5  | 203.1 | 4.8          | C10 H17 N4 O8            |
|          | 321.1021   | 1.4  | 4.4  | 8.5  | 201.2 | 2.8          | C14 H17 N4 O3<br>S ✓     |
|          | 321.1060   | -2.5 | -7.8 | 9.5  | 202.8 | 4.5          | C11 H13 N8 O4            |
|          | 321.1062   | -2.7 | -8.4 | 12.5 | 199.2 | 0.9          | C19 H17 N2 O S           |
|          | 321.1008   | 2.7  | 8.4  | 3.5  | 202.0 | 3.7          | C13 H21 O7 S             |
|          | 321.1063   | -2.8 | -8.7 | 5.5  | 202.7 | 4.4          | C13 H18 N2 O6            |
|          | 321.1004   | 3.1  | 9.7  | 14.5 | 200.6 | 2.3          | Na<br>C20 H14 N2 O<br>Na |

# Compound 109

## Elemental Composition Report

Page 1

### Single Mass Analysis

Tolerance = 5.0 PPM / DBE: min = -1.5, max = 120.0

Element prediction: Off

Number of isotope peaks used for i-FIT = 3

Monoisotopic Mass, Even Electron Ions

875 formula(e) evaluated with 3 results within limits (all results (up to 1000) for each mass)

Elements Used:

C: 15-50 H: 3-70 N: 0-10 O: 0-11 Na: 0-1 S: 0-2

Tau2G n-0 R-MeN

PK Hendris Tau2G n-0 R-MeN 21 (0.513) Cm (21)

1: TOF MS ES+  
8.26e+003

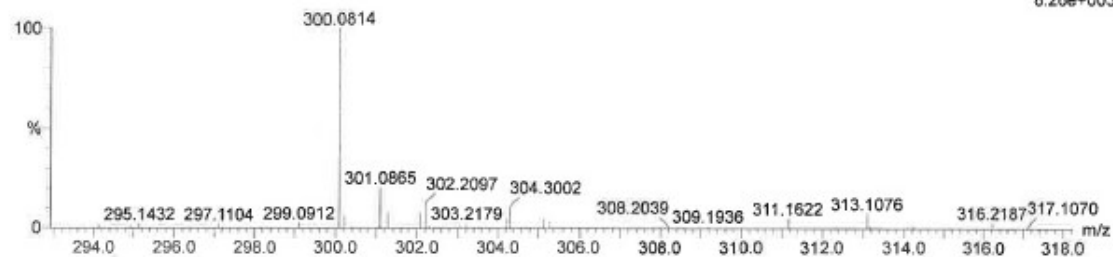

| Mass     | Calc. Mass | mDa  | PPM  | DBE  | i-FIT | i-FIT (Norm) | Formula             |
|----------|------------|------|------|------|-------|--------------|---------------------|
| 300.0814 | 300.0813   | 0.1  | 0.3  | 19.5 | 136.2 | 10.8         | C23 H10 N           |
|          | 300.0807   | 0.7  | 2.3  | 10.5 | 127.0 | 1.5          | C15 H14 N3 O2 ✓     |
|          | 300.0823   | -0.9 | -3.0 | 11.5 | 125.7 | 0.3          | S<br>C18 H15 N Na S |



Compound 110

SPECTRUM - simulation :

| m/z       | Theo. Mass | Delta (mmu) | RDB equiv. | Composition     |
|-----------|------------|-------------|------------|-----------------|
| 286.06450 | 286.06447  | 0.03        | 10.5       | C14 H12 O2 N3 S |
|           |            | -0.43       | 16.0       | C17 H7 N4 F     |
|           |            | -0.63       | 19.5       | C22 H8 N        |
|           |            | 0.91        | 11.0       | C16 H11 O4 F    |
|           |            | -1.32       | 10.0       | C16 H14 O3 S    |

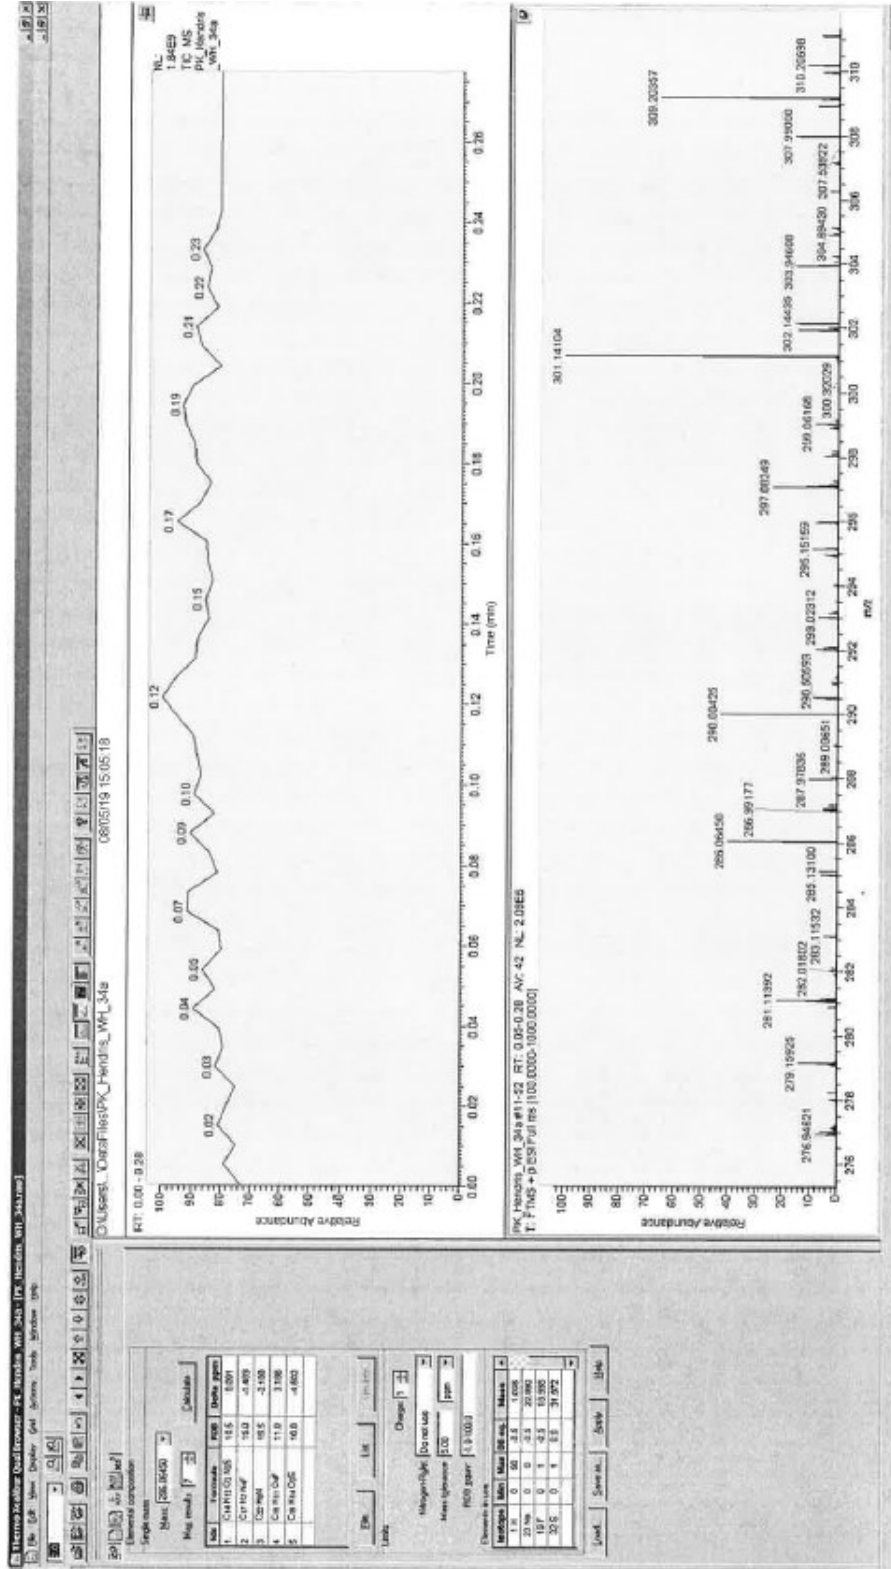

Compound 111

SPECTRUM - simulation :

| m/z       | Theo. Mass | Delta (mmu) | RDB equiv. | Composition     |
|-----------|------------|-------------|------------|-----------------|
| 308.05010 | 308.05017  | -0.07       | 13.0       | C18 H12 O3 S    |
|           | 308.05044  | -0.34       | 14.5       | C19 H11 N Na S  |
|           | 308.04948  | 0.62        | 22.5       | C24 H6 N        |
|           | 308.04882  | 1.28        | 13.5       | C16 H10 O2 N3 S |

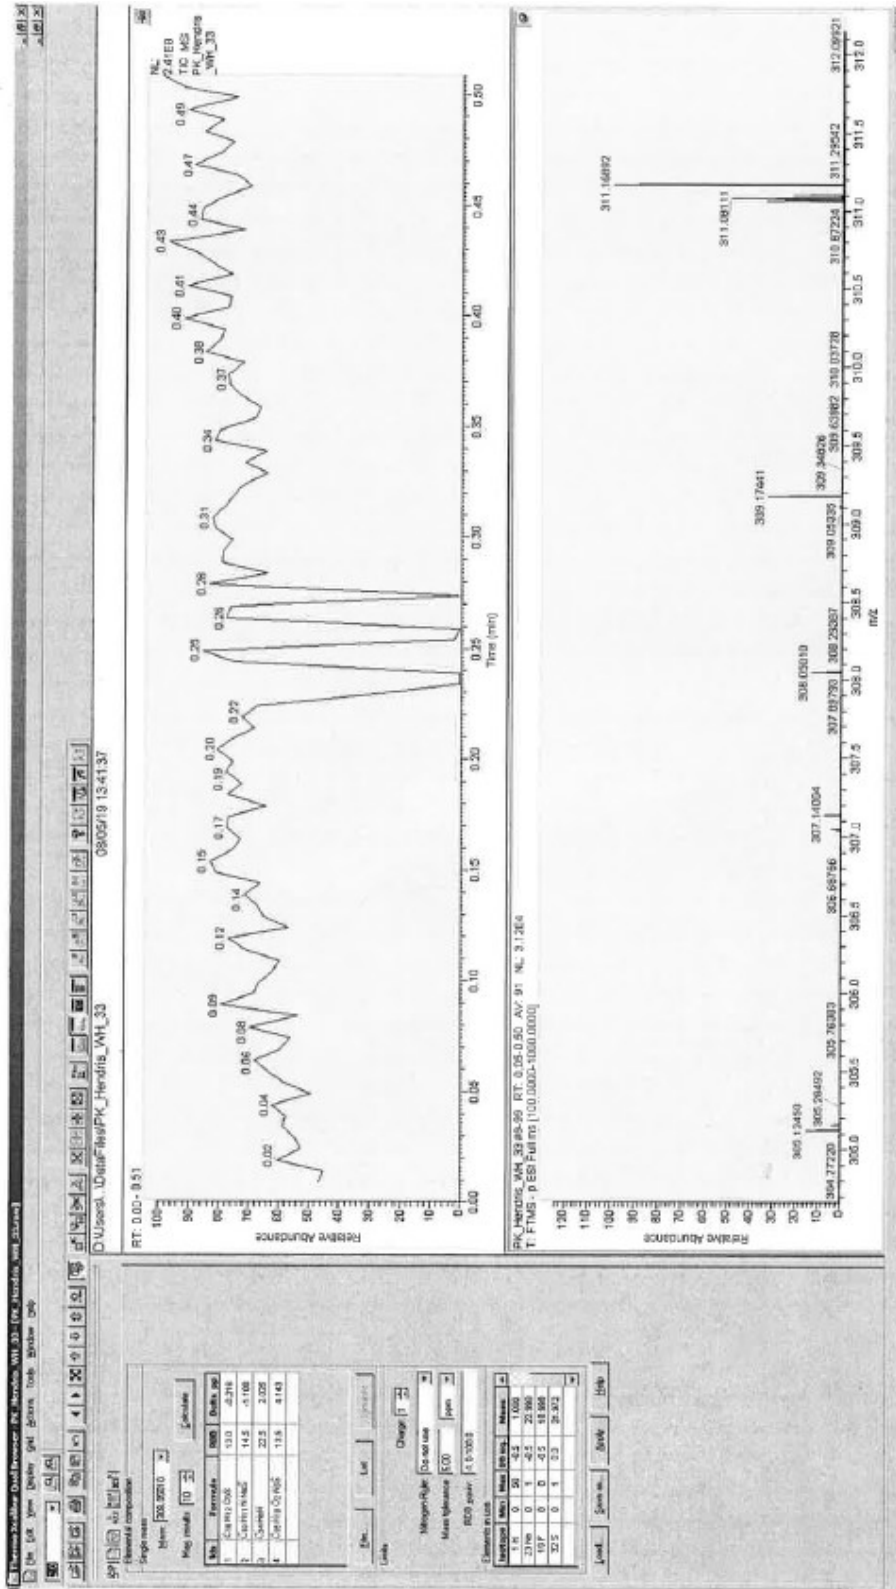

# Compound 112

## Elemental Composition Report

Page 1

### Single Mass Analysis

Tolerance = 5.0 PPM / DBE: min = -1.5, max = 120.0

Element prediction: Off

Number of isotope peaks used for i-FIT = 3

Monoisotopic Mass, Even Electron Ions

3636 formula(e) evaluated with 9 results within limits (up to 15 closest results for each mass)

Elements Used:

C: 12-55 H: 3-70 N: 0-10 O: 0-15 F: 0-3 Na: 0-1 S: 0-2

Tau2G-FL-03

PK Hendris Tau2G-FL-03 37 (0.904) Cm (35:38)

1: TOF MS ES+  
7.69e+003

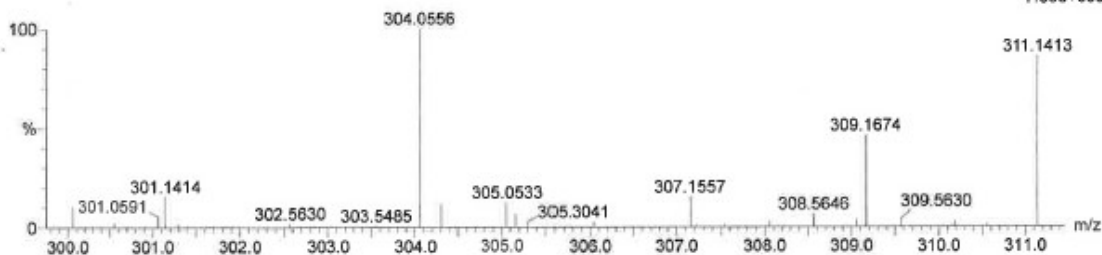

| Mass     | Calc. Mass | mDa  | PPM  | DBE  | i-FIT | i-FIT (Norm) | Formula            |
|----------|------------|------|------|------|-------|--------------|--------------------|
| 304.0556 | 304.0556   | 0.0  | 0.0  | 10.5 | 160.9 | 3.8          | C14 H11 N3 O2 F S  |
|          | 304.0554   | 0.2  | 0.7  | 6.5  | 162.6 | 5.5          | C12 H15 N3 O Na S2 |
|          | 304.0559   | -0.3 | -1.0 | 12.5 | 158.5 | 1.4          | C12 H7 N7 O2 Na    |
|          | 304.0559   | -0.3 | -1.0 | 12.5 | 159.0 | 1.8          | C12 H5 N7 F3       |
|          | 304.0561   | -0.5 | -1.6 | 8.5  | 159.0 | 1.8          | C14 H10 N O2 F3 Na |
|          | 304.0550   | 0.6  | 2.0  | 12.5 | 160.8 | 3.7          | C17 H9 N O F2 Na   |
|          | 304.0563   | -0.7 | -2.3 | 19.5 | 163.0 | 5.8          | C22 H7 N F         |
|          | 304.0545   | 1.1  | 3.6  | 14.5 | 161.6 | 4.5          | C17 H10 N3 O S     |
|          | 304.0570   | -1.4 | -4.6 | 10.5 | 158.2 | 1.0          | C13 H10 N3 O6      |

# Compound 113

## Elemental Composition Report

Page 1

### Single Mass Analysis

Tolerance = 9.0 PPM / DBE: min = -1.5, max = 120.0

Element prediction: Off

Number of isotope peaks used for i-FIT = 3

Monoisotopic Mass, Even Electron Ions

2158 formula(e) evaluated with 10 results within limits (up to 15 closest results for each mass)

Elements Used:

C: 12-55 H: 3-70 N: 0-10 O: 0-15 F: 0-1 Na: 0-1 S: 0-2

Tau2G-FL-01

PK Hendris Tau2G-FL-01 37 (0.904)

1: TOF MS ES+  
3.98e+002

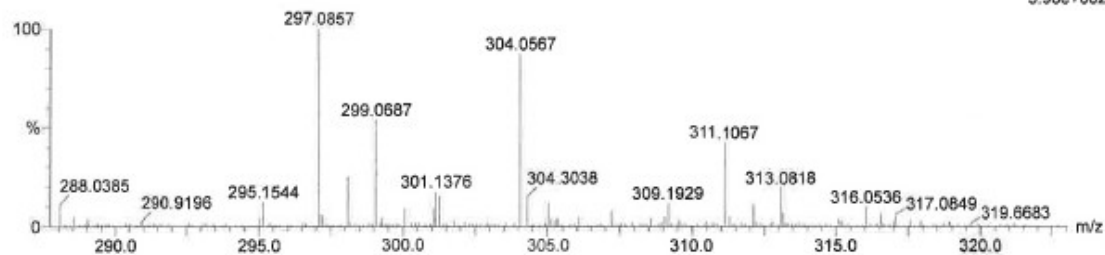

Minimum:

Maximum: 55.0 9.0 -1.5

120.0

| Mass     | Calc. Mass | mDa  | PPM  | DBE  | i-FIT | i-FIT (Norm) | Formula               |
|----------|------------|------|------|------|-------|--------------|-----------------------|
| 304.0567 | 304.0570   | -0.3 | -1.0 | 10.5 | 67.6  | 2.0          | C13 H10 N3 O6         |
|          | 304.0563   | 0.4  | 1.3  | 19.5 | 70.6  | 5.0          | C22 H7 N F            |
|          | 304.0572   | -0.5 | -1.6 | 11.5 | 68.0  | 2.4          | C17 H12 N F Na        |
|          | 304.0559   | 0.8  | 2.6  | 12.5 | 67.8  | 2.2          | S<br>C12 H7 N7 O2     |
|          | 304.0556   | 1.1  | 3.6  | 10.5 | 66.4  | 0.8          | Na<br>C14 H11 N3 O2   |
|          | 304.0578   | -1.1 | -3.6 | 9.5  | 69.6  | 4.0          | F S<br>C14 H14 N3 O   |
|          | 304.0554   | 1.3  | 4.3  | 6.5  | 68.7  | 3.1          | S2<br>C12 H15 N3 O    |
|          | 304.0583   | -1.6 | -5.3 | 15.5 | 69.1  | 3.5          | Na S2<br>C14 H6 N7 O2 |
|          | 304.0586   | -1.9 | -6.2 | 11.5 | 69.4  | 3.8          | C16 H11 N O4          |
|          | 304.0545   | 2.2  | 7.2  | 14.5 | 68.3  | 2.7          | Na<br>C17 H10 N3 O S  |

# Compound 114

## Elemental Composition Report

Page 1

### Single Mass Analysis

Tolerance = 5.0 PPM / DBE: min = -1.5, max = 120.0

Element prediction: Off

Number of isotope peaks used for i-FIT = 3

Monoisotopic Mass, Even Electron Ions

3636 formula(e) evaluated with 10 results within limits (up to 15 closest results for each mass)

Elements Used:

C: 12-55 H: 3-70 N: 0-10 O: 0-15 F: 0-3 Na: 0-1 S: 0-2

Tau2G-FL-02

PK Hendris Tau2G-FL-02 36 (0.867) Cm (36:37)

1: TOF MS ES+  
3.03e+003

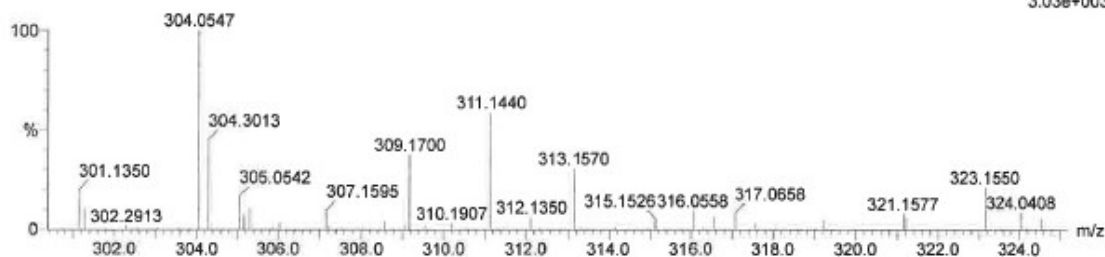

Minimum: -1.5  
Maximum: 55.0 5.0 120.0

| Mass     | Calc. Mass | mDa  | PPM  | DBE  | i-FIT | i-FIT (Norm) | Formula              |
|----------|------------|------|------|------|-------|--------------|----------------------|
| 304.0547 | 304.0545   | 0.2  | 0.7  | 14.5 | 153.1 | 3.2          | C17 H10 N3 O S       |
|          | 304.0550   | -0.3 | -1.0 | 12.5 | 152.6 | 2.7          | C17 H9 N O F2 Na     |
|          | 304.0554   | -0.7 | -2.3 | 6.5  | 155.1 | 5.2          | C12 H15 N3 O Na S2   |
|          | 304.0538   | 0.9  | 3.0  | 16.5 | 153.9 | 4.0          | C20 H8 N F Na        |
|          | 304.0556   | -0.9 | -3.0 | 10.5 | 152.4 | 2.5          | C14 H11 N3 O2 F S    |
|          | 304.0559   | -1.2 | -3.9 | 12.5 | 152.0 | 2.0          | C12 H7 N7 O2 Na      |
|          | 304.0559   | -1.2 | -3.9 | 12.5 | 152.8 | 2.9          | C12 H5 N7 F3         |
|          | 304.0534   | 1.3  | 4.3  | 11.5 | 151.2 | 1.2          | C14 H8 N3 O3 F2      |
|          | 304.0561   | -1.4 | -4.6 | 8.5  | 152.4 | 2.5          | C14 H10 N O2 F3 Na   |
|          | 304.0532   | 1.5  | 4.9  | 7.5  | 151.5 | 1.6          | C12 H12 N3 O2 F Na S |



# Compound 116

## Elemental Composition Report

Page 1

### Single Mass Analysis

Tolerance = 5.0 PPM / DBE: min = -1.5, max = 120.0

Element prediction: Off

Number of isotope peaks used for i-FIT = 3

Monoisotopic Mass, Even Electron Ions

977 formula(e) evaluated with 3 results within limits (all results (up to 1000) for each mass)

Elements Used:

C: 15-50 H: 3-70 N: 0-10 O: 0-11 Na: 0-1 S: 0-2

Tau2GFL n-1 R-MeN

PK Hendris Tau2GFL n-1 R-MeN 60 (1.434) Cm (60:62)

1: TOF MS ES+  
3.67e+002

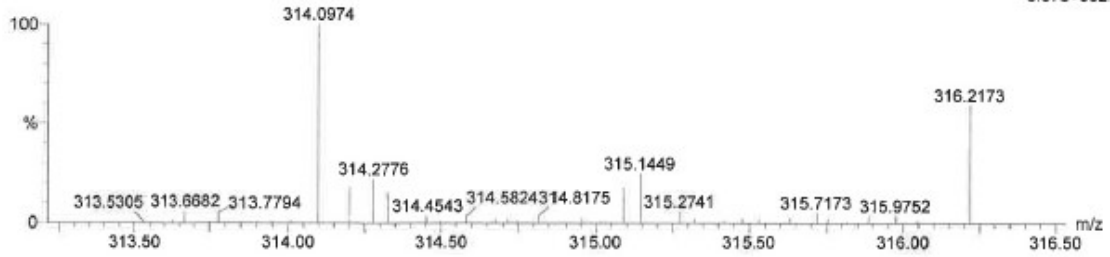

Minimum: 55.0 5.0 -1.5  
Maximum: 120.0

| Mass     | Calc. Mass | mDa  | PPM  | DBE  | i-FIT | i-FIT (Norm) | Formula         |
|----------|------------|------|------|------|-------|--------------|-----------------|
| 314.0974 | 314.0970   | 0.4  | 1.3  | 19.5 | 146.9 | 0.3          | C24 H12 N       |
|          | 314.0979   | -0.5 | -1.6 | 11.5 | 148.9 | 2.3          | C19 H17 N Na S  |
|          | 314.0963   | 1.1  | 3.5  | 10.5 | 148.6 | 2.0          | C16 H16 N3 O2 S |

# Compound 117

## Elemental Composition Report

Page 1

### Single Mass Analysis

Tolerance = 5.0 PPM / DBE: min = -1.5, max = 120.0

Element prediction: Off

Number of isotope peaks used for i-FIT = 3

Monoisotopic Mass, Even Electron Ions

873 formula(e) evaluated with 3 results within limits (all results (up to 1000) for each mass)

Elements Used:

C: 15-50 H: 3-70 N: 0-10 O: 0-11 Na: 0-1 S: 0-2

Tau2GFL n-1 R-H

PK Hendris Tau2GFL n-1 R-H 58 (1.399) Cm (58:59)

1: TOF MS ES+  
1.57e+003

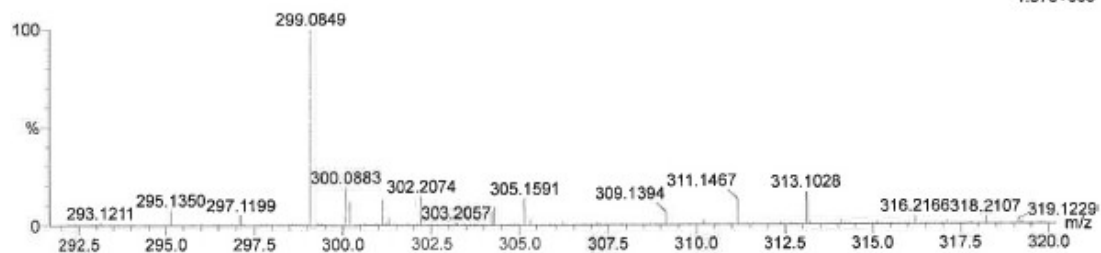

Minimum:

Maximum: 55.0 5.0 -1.5

| Mass     | Calc. Mass | mDa  | PPM  | DBE  | i-FIT | i-FIT (Norm) | Formula              |
|----------|------------|------|------|------|-------|--------------|----------------------|
| 299.0849 | 299.0854   | -0.5 | -1.7 | 10.5 | 146.1 | 1.1          | C16 H15 N2 O2 ✓<br>S |
|          | 299.0861   | -1.2 | -4.0 | 19.5 | 145.9 | 0.9          | C24 H11              |
|          | 299.0837   | 1.2  | 4.0  | 16.5 | 146.3 | 1.3          | C22 H12 Na           |



# Compound 118

## Elemental Composition Report

Page 1

### Single Mass Analysis

Tolerance = 5.0 PPM / DBE: min = -1.5, max = 120.0

Element prediction: Off

Number of isotope peaks used for i-FIT = 3

Monoisotopic Mass, Even Electron Ions

973 formula(e) evaluated with 3 results within limits (all results (up to 1000) for each mass)

Elements Used:

C: 15-50 H: 3-70 N: 0-10 O: 0-11 Na: 0-1 S: 0-2

Tau2GFL n-1 Rr2-Me

PK Hendris Tau2GFL n-1 Rr2-Me 45 (1.079) Cm (45.46)

1: TOF MS ES+  
3.91e+004

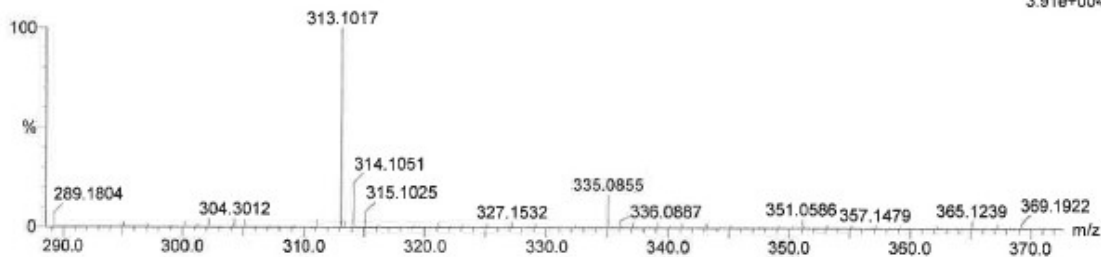

Minimum: -1.5  
Maximum: 55.0 5.0 120.0

| Mass     | Calc. Mass | mDa  | PPM  | DBE  | i-FIT | i-FIT (Norm) | Formula         |
|----------|------------|------|------|------|-------|--------------|-----------------|
| 313.1017 | 313.1017   | 0.0  | 0.0  | 19.5 | 198.7 | 13.4         | C25 H13         |
|          | 313.1011   | 0.6  | 1.9  | 10.5 | 186.6 | 1.2          | C17 H17 N2 O2 S |
|          | 313.1027   | -1.0 | -3.2 | 11.5 | 185.7 | 0.3          | C20 H18 Na S    |

# Compound 119

S121

Elemental Composition Report

Single Mass Analysis

Tolerance = 5.0 PPM / DBE: min = -1.5, max = 120.0

Element prediction: Off

Number of isotope peaks used for i-FIT = 3

Monoisotopic Mass, Even Electron Ions

1855 formula(e) evaluated with 5 results within limits (all results (up to 1000) for each mass)

Elements Used:

C: 15-50 H: 3-70 N: 0-10 O: 0-11 F: 0-1 Na: 0-1 S: 0-2

Tau2GFL n-1 R-F

PK Hendris Tau2GFL n-1 R-F 78 (1.859) Cm (78:79)

1: TOF MS ES+  
1.18e+003

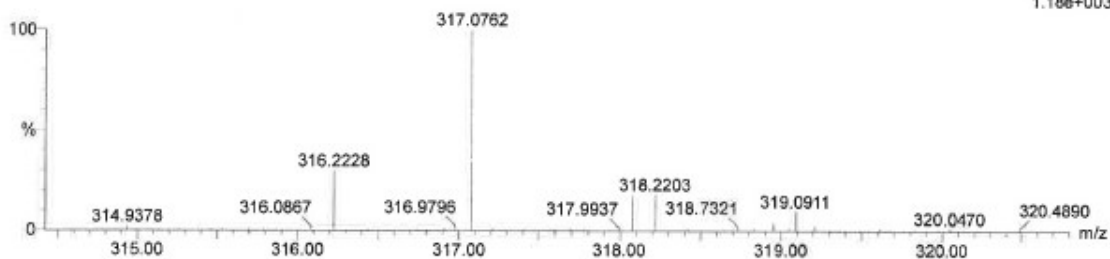

Minimum: -1.5  
Maximum: 55.0 5.0 120.0

| Mass     | Calc. Mass | mDa  | PPM  | DBE  | i-FIT | i-FIT (Norm) | Formula           |
|----------|------------|------|------|------|-------|--------------|-------------------|
| 317.0762 | 317.0760   | 0.2  | 0.6  | 10.5 | 115.0 | 0.8          | C16 H14 N2 O2 F S |
|          | 317.0767   | -0.5 | -1.6 | 19.5 | 116.7 | 2.5          | C24 H10 F         |
|          | 317.0774   | -1.2 | -3.8 | 10.5 | 116.3 | 2.1          | C15 H13 N2 O6     |
|          | 317.0749   | 1.3  | 4.1  | 14.5 | 116.1 | 1.9          | C19 H13 N2 O S    |
|          | 317.0776   | -1.4 | -4.4 | 11.5 | 115.9 | 1.7          | C19 H15 F Na S    |

Compound 120

S122

Single Mass Analysis

Tolerance = 5.0 PPM / DBE: min = -1.5, max = 120.0

Element prediction: Off

Number of isotope peaks used for i-FIT = 3

Monoisotopic Mass, Even Electron Ions

4107 formula(e) evaluated with 12 results within limits (up to 15 closest results for each mass)

Elements Used:

C: 12-55 H: 3-70 N: 0-10 O: 0-15 F: 0-3 Na: 0-1 S: 0-2

Tau2G-FL-05

PK Hendris Tau2G-FL-05 29 (0.708) Cm (28:30)

1: TOF MS ES+  
2.35e+003

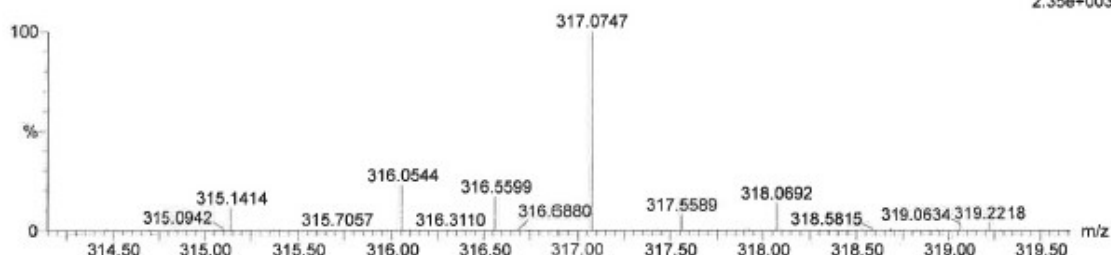

Minimum:

Maximum: 55.0 5.0 -1.5

| Mass     | Calc. Mass | mDa  | PPM  | DBE  | i-FIT | i-FIT (Norm) | Formula              |
|----------|------------|------|------|------|-------|--------------|----------------------|
| 317.0747 | 317.0749   | -0.2 | -0.6 | 7.5  | 134.1 | 1.5          | C13 H12 N2 O4 F3     |
|          | 317.0749   | -0.2 | -0.6 | 14.5 | 138.5 | 5.8          | C19 H13 N2 O S       |
|          | 317.0750   | -0.3 | -0.9 | 7.5  | 133.2 | 0.6          | C13 H14 N2 O6 Na     |
|          | 317.0742   | 0.5  | 1.6  | 16.5 | 138.8 | 6.2          | C22 H11 F Na         |
|          | 317.0754   | -0.7 | -2.2 | 12.5 | 137.8 | 5.1          | C19 H12 O F2 Na      |
|          | 317.0738   | 0.9  | 2.8  | 9.5  | 135.4 | 2.8          | C12 H9 N6 F3 Na      |
|          | 317.0738   | 0.9  | 2.8  | 11.5 | 136.0 | 3.4          | C16 H11 N2 O3 F2     |
|          | 317.0736   | 1.1  | 3.5  | 7.5  | 136.5 | 3.9          | C14 H15 N2 O2 F Na S |
|          | 317.0758   | -1.1 | -3.5 | 6.5  | 139.6 | 7.0          | C14 H18 N2 O Na S2   |
|          | 317.0760   | -1.3 | -4.1 | 10.5 | 137.8 | 5.2          | C16 H14 N2 O2 F S    |
|          | 317.0733   | 1.4  | 4.4  | 11.5 | 135.6 | 3.0          | C12 H10 N8 F S       |
|          | 317.0763   | -1.6 | -5.0 | 12.5 | 136.4 | 3.8          | C14 H8 N6 F3         |

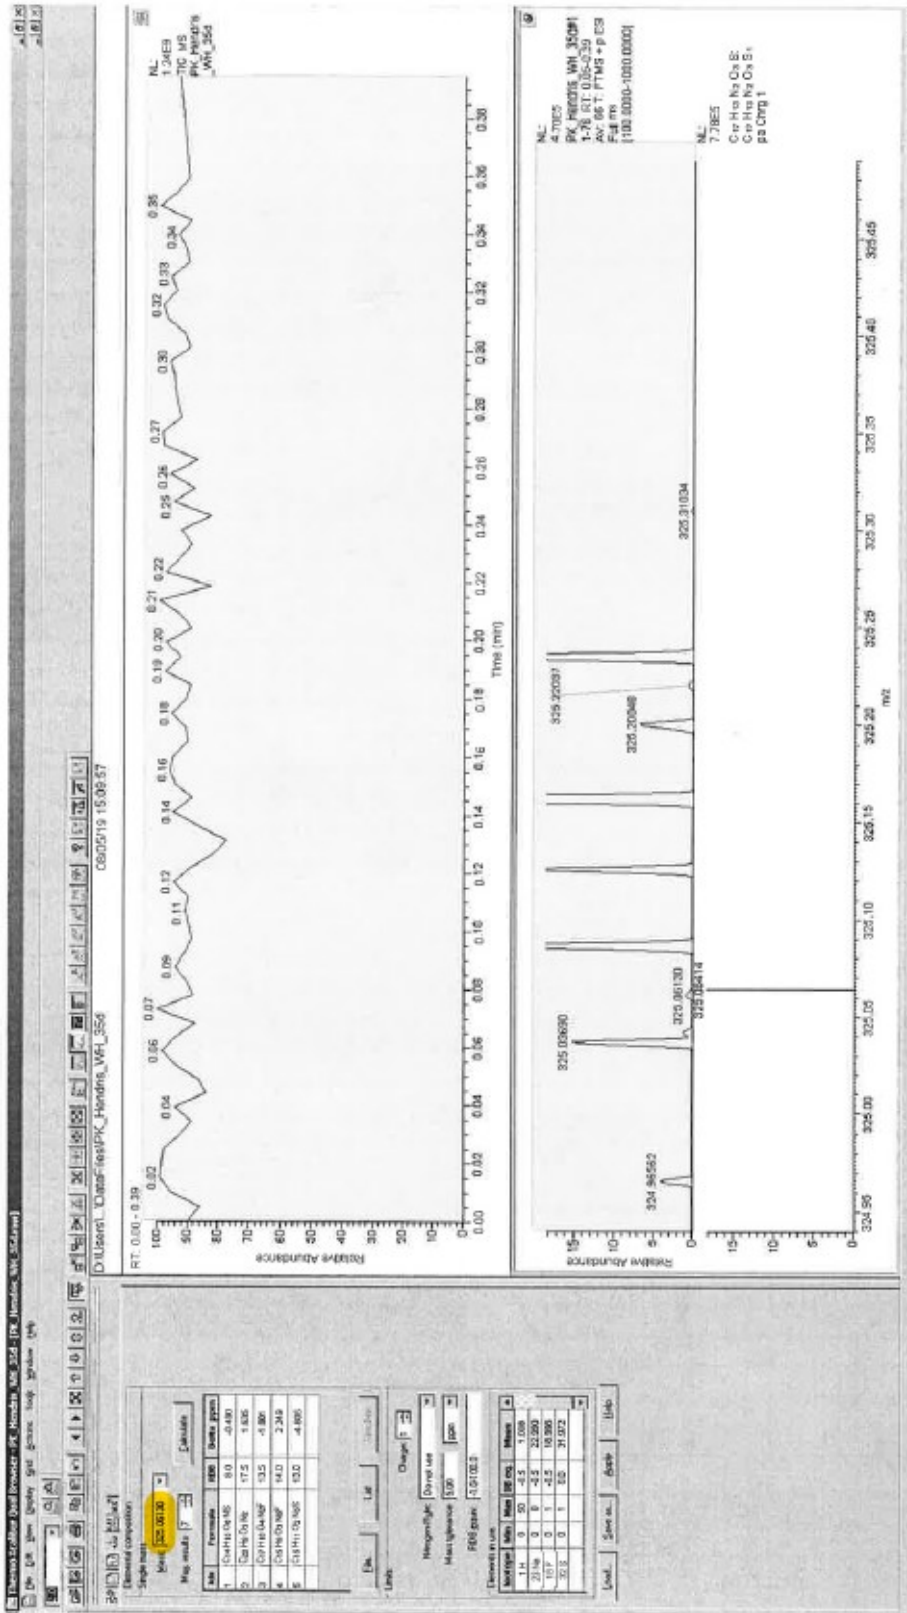

Compound 128

S124

SPECTRUM - simulation :

| m/z       | Theo. Mass | Delta (mmu) | RDB equiv. | Composition       |
|-----------|------------|-------------|------------|-------------------|
| 318.05937 | 318.05947  | -0.10       | 10.5       | C16 H13 O3 N F S  |
| 318.05878 | 318.05878  | 0.59        | 20.0       | C22 H7 N2 F       |
| 318.05833 | 318.05833  | 1.04        | 14.5       | C19 H12 O2 N S    |
| 318.05813 | 318.05813  | 1.24        | 11.0       | C14 H11 O2 N4 F S |
| 318.06082 | 318.06082  | -1.45       | 16.0       | C14 H6 O2 N8      |
| 318.06083 | 318.06083  | -1.46       | 10.5       | C15 H12 O7 N      |

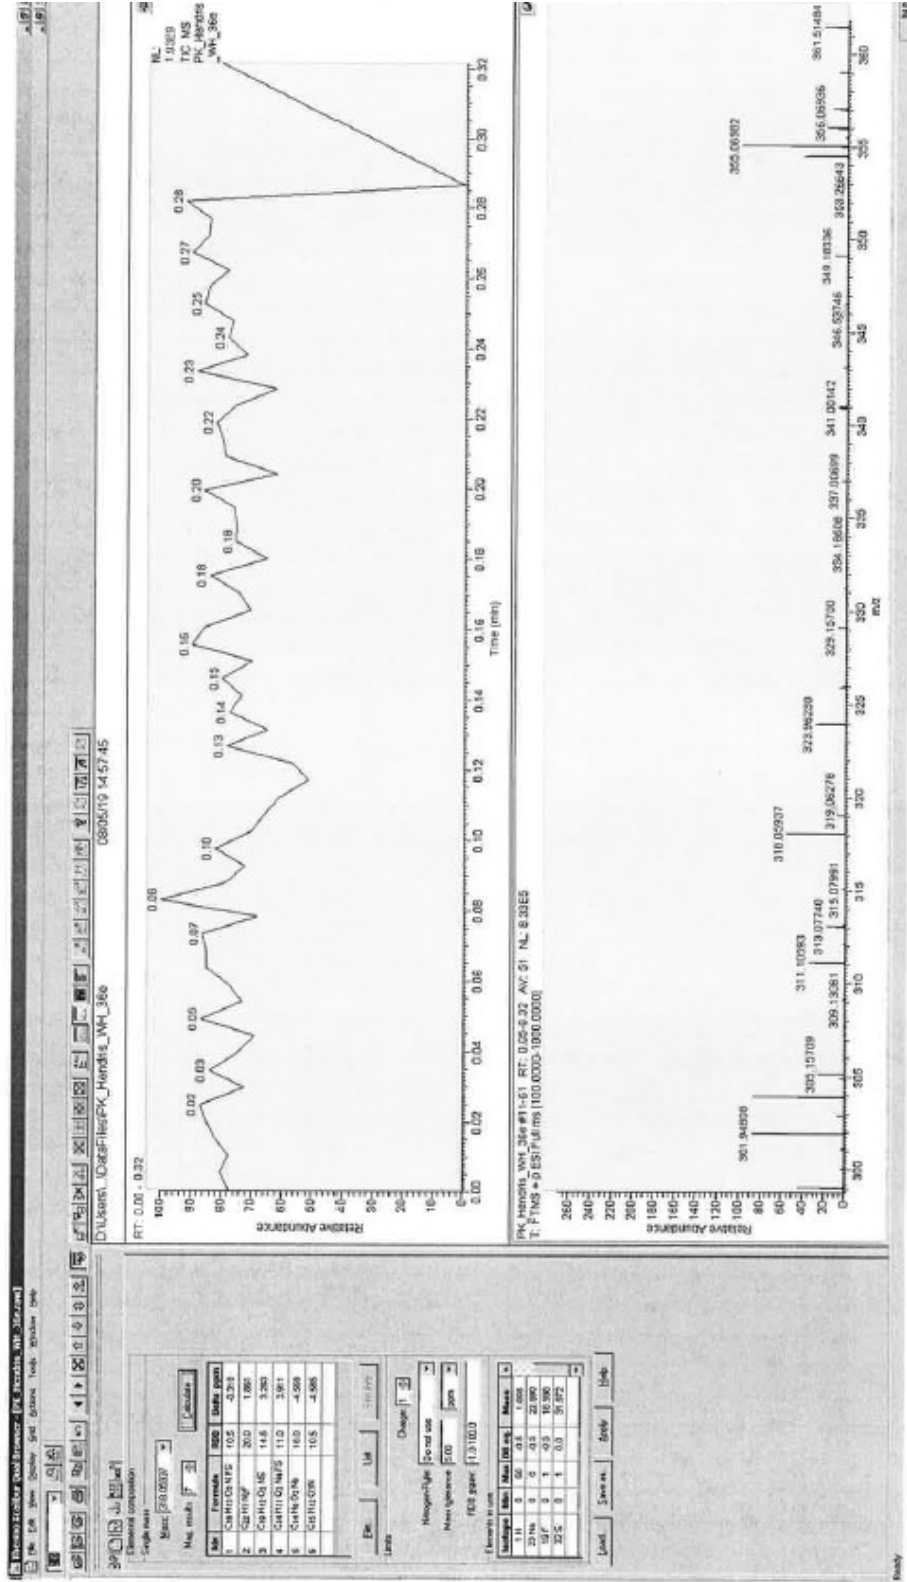

Compound 129

S125

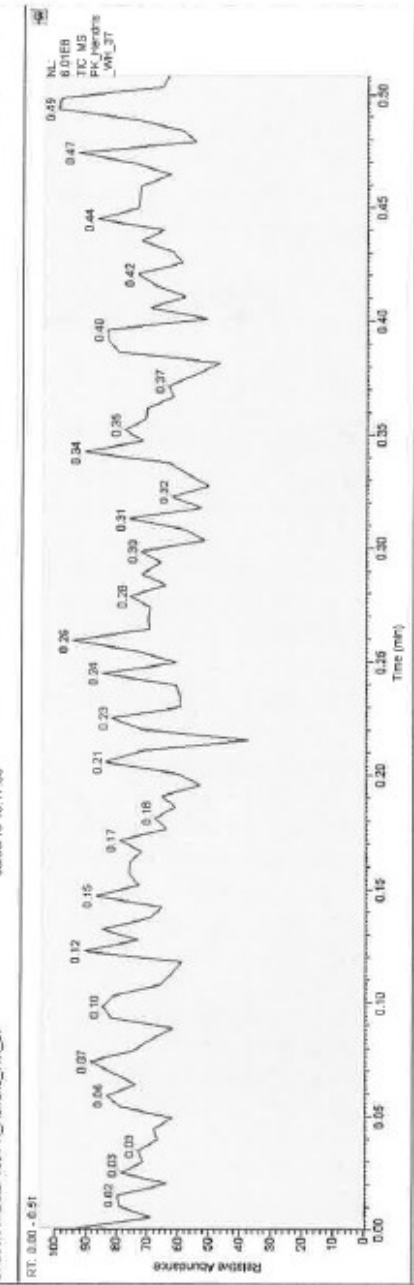

| PK | Lot | Time (min) |
|----|-----|------------|
| 1  |     | 0.03       |
| 2  |     | 0.07       |
| 3  |     | 0.10       |
| 4  |     | 0.12       |
| 5  |     | 0.15       |
| 6  |     | 0.17       |
| 7  |     | 0.18       |
| 8  |     | 0.21       |
| 9  |     | 0.23       |
| 10 |     | 0.24       |
| 11 |     | 0.26       |
| 12 |     | 0.28       |
| 13 |     | 0.31       |
| 14 |     | 0.32       |
| 15 |     | 0.34       |
| 16 |     | 0.37       |
| 17 |     | 0.40       |
| 18 |     | 0.42       |
| 19 |     | 0.44       |
| 20 |     | 0.47       |
| 21 |     | 0.49       |
| 22 |     | 0.51       |

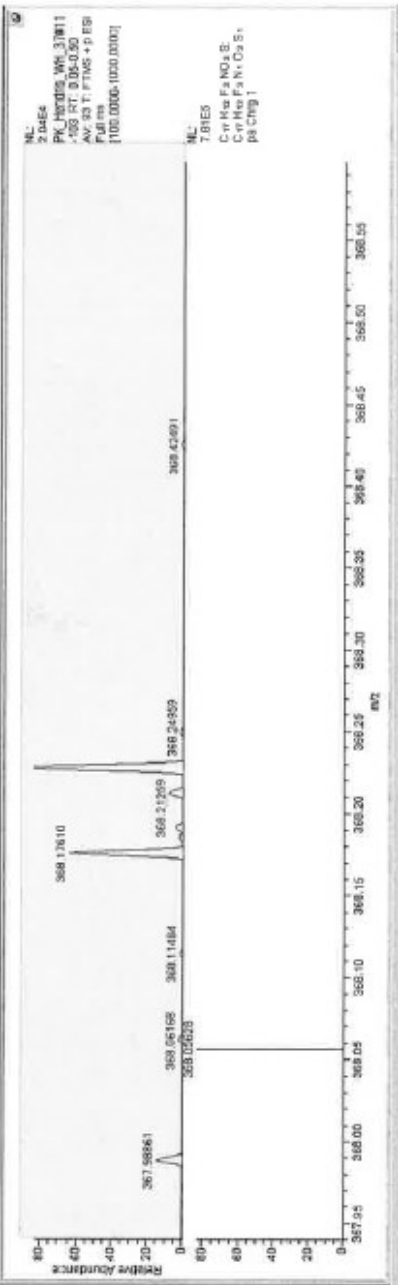

| Element | Mass | Abundance |
|---------|------|-----------|
| C       | 12   | 100       |
| H       | 1    | 100       |
| N       | 14   | 100       |
| O       | 16   | 100       |
| S       | 32   | 100       |
| Cl      | 35.5 | 100       |
| Br      | 79   | 100       |
| I       | 127  | 100       |
| Na      | 23   | 100       |
| K       | 39   | 100       |
| Ca      | 40   | 100       |
| Mg      | 24   | 100       |
| Fe      | 56   | 100       |
| Zn      | 65   | 100       |
| Cu      | 63.5 | 100       |
| Pb      | 207  | 100       |
| Ba      | 137  | 100       |
| As      | 75   | 100       |
| Sb      | 121  | 100       |
| Bi      | 209  | 100       |
| Po      | 209  | 100       |
| At      | 210  | 100       |
| Rn      | 222  | 100       |
| Ac      | 227  | 100       |
| Th      | 232  | 100       |
| Pa      | 231  | 100       |
| U       | 238  | 100       |
| Np      | 237  | 100       |
| Pu      | 244  | 100       |
| Am      | 243  | 100       |
| Cm      | 250  | 100       |
| Bk      | 249  | 100       |
| Cf      | 251  | 100       |
| Es      | 252  | 100       |
| Fm      | 257  | 100       |
| Mn      | 55   | 100       |
| Cr      | 52   | 100       |
| V       | 51   | 100       |
| Ti      | 48   | 100       |
| Sc      | 45   | 100       |
| Y       | 89   | 100       |
| Zr      | 91   | 100       |
| Nb      | 93   | 100       |
| Mo      | 96   | 100       |
| Tc      | 98   | 100       |
| Ru      | 101  | 100       |
| Rh      | 103  | 100       |
| Pd      | 106  | 100       |
| Ag      | 108  | 100       |
| Cd      | 112  | 100       |
| In      | 115  | 100       |
| Sn      | 119  | 100       |
| Sb      | 122  | 100       |
| Te      | 128  | 100       |
| I       | 127  | 100       |
| Xe      | 131  | 100       |
| Ba      | 137  | 100       |
| La      | 139  | 100       |
| Ce      | 140  | 100       |
| Pr      | 141  | 100       |
| Nd      | 144  | 100       |
| Pm      | 145  | 100       |
| Sm      | 150  | 100       |
| Eu      | 152  | 100       |
| Gd      | 157  | 100       |
| Tb      | 159  | 100       |
| Dy      | 163  | 100       |
| Ho      | 165  | 100       |
| Er      | 167  | 100       |
| Tm      | 169  | 100       |
| Yb      | 173  | 100       |
| Lu      | 175  | 100       |
| Hf      | 178  | 100       |
| Ta      | 181  | 100       |
| W       | 184  | 100       |
| Re      | 187  | 100       |
| Os      | 190  | 100       |
| Ir      | 193  | 100       |
| Pt      | 195  | 100       |
| Au      | 197  | 100       |
| Hg      | 201  | 100       |
| Tl      | 205  | 100       |
| Pb      | 207  | 100       |
| Bi      | 209  | 100       |
| Po      | 209  | 100       |
| At      | 210  | 100       |
| Rn      | 222  | 100       |
| Ac      | 227  | 100       |
| Th      | 232  | 100       |
| Pa      | 231  | 100       |
| U       | 238  | 100       |
| Np      | 237  | 100       |
| Pu      | 244  | 100       |
| Am      | 243  | 100       |
| Cm      | 250  | 100       |
| Bk      | 249  | 100       |
| Cf      | 251  | 100       |
| Es      | 252  | 100       |
| Fm      | 257  | 100       |

## 6. Physicochemical properties of several ligand candidates

| Structure                                                                                                                        | clogP <sup>a</sup> | HBA <sup>a</sup> | HBD <sup>a</sup> | PSA <sup>a</sup> | logBB <sup>b</sup> |
|----------------------------------------------------------------------------------------------------------------------------------|--------------------|------------------|------------------|------------------|--------------------|
| 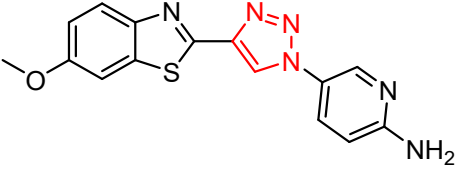 <p style="text-align: center;"><b>30</b></p>   | 2.35               | 7                | 2                | 91.76            | -0.862             |
|  <p style="text-align: center;"><b>31</b></p>   | 2.73               | 7                | 1                | 77.76            | -0.597             |
|  <p style="text-align: center;"><b>32</b></p>   | 2.19               | 7                | 2                | 88.76            | -0.842             |
|  <p style="text-align: center;"><b>64</b></p> | 3.87               | 5                | 0                | 52.84            | -0.005             |
|  <p style="text-align: center;"><b>67</b></p> | 4.82               | 5                | 0                | 52.84            | 0,090              |
|  <p style="text-align: center;"><b>69</b></p> | 3.71               | 5                | 0                | 52.84            | -0.008             |
|  <p style="text-align: center;"><b>70</b></p> | 3.44               | 6                | 1                | 73.07            | -0,420             |

|                                                                                                                                  |      |   |   |       |        |
|----------------------------------------------------------------------------------------------------------------------------------|------|---|---|-------|--------|
| 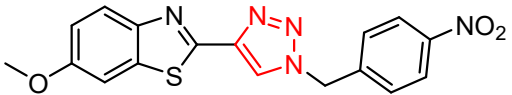 <p style="text-align: center;"><b>71</b></p>   | 3.67 | 8 | 0 | 98.67 | -0.763 |
|  <p style="text-align: center;"><b>72</b></p>   | 3.88 | 8 | 0 | 98.67 | -0.732 |
|  <p style="text-align: center;"><b>73</b></p>   | 3.46 | 6 | 0 | 76.64 | -0,469 |
|  <p style="text-align: center;"><b>75</b></p>   | 4.47 | 4 | 0 | 43.61 | 0.173  |
|  <p style="text-align: center;"><b>89</b></p> | 1.48 | 6 | 1 | 73.07 | -0.717 |
|  <p style="text-align: center;"><b>90</b></p> | 1.75 | 6 | 1 | 73.07 | -0.674 |
|  <p style="text-align: center;"><b>91</b></p> | 3.54 | 6 | 1 | 73.07 | -0.404 |
|  <p style="text-align: center;"><b>92</b></p> | 4.05 | 6 | 1 | 73.07 | -0.327 |
|  <p style="text-align: center;"><b>93</b></p> | 1.37 | 7 | 1 | 82.31 | -0,871 |



|                                               |      |    |    |       |        |
|-----------------------------------------------|------|----|----|-------|--------|
| <p style="text-align: center;"><b>110</b></p> | 1.74 | 5  | 1  | 64.12 | -0,546 |
| <p style="text-align: center;"><b>111</b></p> | 2.76 | 5  | 1  | 75.02 | -0.552 |
| <p style="text-align: center;"><b>115</b></p> | 2.36 | 5  | 2  | 71.45 | -0.560 |
| <p style="text-align: center;"><b>127</b></p> | 3.32 | 5  | 0  | 72.22 | -0.425 |
| <p style="text-align: center;"><b>128</b></p> | 3.70 | 4  | 0  | 48.43 | -0.015 |
| <p style="text-align: center;"><b>129</b></p> | 4.46 | 4  | 0  | 48.43 | 0.100  |
| Required <sup>c</sup>                         | ≤5   | ≤7 | ≤3 | ≤90   | >-1    |

<sup>a</sup>Calculated using Cheminformatics (<http://www.molinspiration.com/>).

<sup>b</sup>LogBB =  $-0.0148 \times \text{TPSA} + 0.152 \times \text{cLogP} + 0.139$ .<sup>14</sup>

<sup>c</sup>Parameters required to fulfill physicochemical properties (drug-like molecules) according to Lipinski's Rules.<sup>15</sup>

## 6. References

1. P. T. S. Lau and T. E. Gomp, *J. Org. Chem.*, 1970, **35**, 4103-4108.
2. G. Colombano, C. Albani, G. Ottonello, A. Ribeiro, R. Scarpelli, G. Tarozzo, J. Daglian, K. M. Jung, D. Piomelli and T. Bandiera, *Chem. Med. Chem.*, 2015, **10**, 380-395.
3. S. Lal, H. S. Rzepa and S. Díez-González, *Catal.*, 2014, **4**, 2274-2287.
4. T. Suzuki, Y. Ota, M. Ri, M. Bando, A. Gotoh, Y. Itoh, H. Tsumoto, P. R. Tatum, T. Mizukami, H. Nakagawa, S. Iida, R. Ueda, K. Shirahige and N. Miyata, *J. Med. Chem.*, 2012, **55**, 9562-9575.
5. B. Ourri, O. Tillement, T. Tu, E. Jeanneau, U. Darbost and I. Bonnamour, *New. J. Chem.*, 2016, **40**, 9477-9485.
6. Y. Yan, T. M. Deaton, J. Zhang, H. He, J. Hayat, P. Pageni, K. Matyjaszewski and C. Tang, *Macromolecules.*, 2015, **48**, 1644-1650.
7. T. Masuya, M. Murai, H. Morisaka and H. Miyoshi, *Biochemistry.*, 2014, **53**, 7816-7823.
8. L. Diaz, J. Casas, J. Bujons, A. Llebaria and A. Delgado, *J. Med. Chem.*, 2011, **54**, 2069-2079.
9. R. Sommer, J. Neres, J. Piton, N. Dhar, A. van der Sar, R. Mukherjee, T. Laroche, P. J. Dyson, J. D. McKinney, W. Bitter, V. Makarov and S. T. Cole, *Chem. Biol.*, 2018, **13**, 3184-3192.
10. Y. Jia, H. Qin, N. Wang, Z. X. Jiang and Z. Yang, *J. Org. Chem.*, 2018, **83**, 2808-2817.
11. C. Dyrager, R. P. Vieira, S. Nyström, K. P. R. Nilsson and T. Storr, *New. J. Chem.*, 2017, **41**, 1566-1573.
12. G. C. Meroni, P.; Meda, C.; Maggi, A.; Santaniello, E, *Arkivoc.*, 2009, **11**, 22-30.
13. Z. J. Bin, L.; Wei, C.; Yunxia, W.; Zhen, S., *Chin. J. Chem.*, 2010, **28**, 111-114.
14. D.E. Clark., *J. Pharm. Sci.*, 1999, **88**, 815-821.
15. C.A. Lipinski., *Drug Discov. Today Technol.*, 2004, **1**, 337-341.
